# Supplementary material
Source: MDPI journal article supplement (https://www.mdpi.com/2073-4352/9/4/184)

# checkCIF/PLATON report

You have not supplied any structure factors. As a result the full set of tests cannot be run.

THIS REPORT IS FOR GUIDANCE ONLY. IF USED AS PART OF A REVIEW PROCEDURE FOR PUBLICATION, IT SHOULD NOT REPLACE THE EXPERTISE OF AN EXPERIENCED CRYSTALLOGRAPHIC REFEREE.

No syntax errors found.      CIF dictionary      Interpreting this report

## Datablock: JJJ

---

Bond precision:    C-C = 0.0213 A                      Wavelength=0.71073

Cell:                      a=13.425(3)              b=11.817(2)              c=15.660(3)  
                                alpha=90              beta=90              gamma=90  
Temperature:              293 K

|                | Calculated                   | Reported          |
|----------------|------------------------------|-------------------|
| Volume         | 2484.4(8)                    | 2484.4(9)         |
| Space group    | P n a 21                     | P n a 21          |
| Hall group     | P 2c -2n                     | P 2c -2n          |
| Moiety formula | C12 H24 O6, C6 H6 F2 N, F6 P | ?                 |
| Sum formula    | C18 H30 F8 N O6 P            | C18 H30 F8 N O6 P |
| Mr             | 539.40                       | 539.40            |
| Dx,g cm-3      | 1.442                        | 1.442             |
| Z              | 4                            | 4                 |
| Mu (mm-1)      | 0.203                        | 0.203             |
| F000           | 1120.0                       | 1120.0            |
| F000'          | 1121.35                      |                   |
| h,k,lmax       | 17,15,20                     | 17,15,20          |
| Nref           | 5697[ 2954]                  | 5528              |
| Tmin,Tmax      |                              | 0.730,1.000       |
| Tmin'          |                              |                   |

Correction method= # Reported T Limits: Tmin=0.730 Tmax=1.000  
AbsCorr = MULTI-SCAN

Data completeness= 1.87/0.97                      Theta(max)= 27.467

R(reflections)= 0.1370( 3147)                      wR2(reflections)= 0.2955( 5528)

S = 1.208                      Npar= 309

---

The following ALERTS were generated. Each ALERT has the format

**test-name\_ALERT\_alert-type\_alert-level.**

Click on the hyperlinks for more details of the test.

---

### Alert level B

|                   |      |                                           |         |       |
|-------------------|------|-------------------------------------------|---------|-------|
| PLAT241_ALERT_2_B | High | 'MainMol' Ueq as Compared to Neighbors of | C7      | Check |
| PLAT242_ALERT_2_B | Low  | 'MainMol' Ueq as Compared to Neighbors of | 05      | Check |
| PLAT340_ALERT_3_B | Low  | Bond Precision on C-C Bonds .....         | 0.02125 | Ang.  |

---

### Alert level C

ABSTY02\_ALERT\_1\_C An \_exptl\_absorpt\_correction\_type has been given without  
a literature citation. This should be contained in the  
\_exptl\_absorpt\_process\_details field.

Absorption correction given as multi-scan

|                   |                                                  |        |        |
|-------------------|--------------------------------------------------|--------|--------|
| PLAT053_ALERT_1_C | Minimum Crystal Dimension Missing (or Error) ... | Please | Check  |
| PLAT054_ALERT_1_C | Medium Crystal Dimension Missing (or Error) ...  | Please | Check  |
| PLAT055_ALERT_1_C | Maximum Crystal Dimension Missing (or Error) ... | Please | Check  |
| PLAT082_ALERT_2_C | High R1 Value .....                              | 0.14   | Report |
| PLAT084_ALERT_3_C | High wR2 Value (i.e. > 0.25) .....               | 0.30   | Report |
| PLAT213_ALERT_2_C | Atom C7 has ADP max/min Ratio .....              | 3.7    | prolat |
| PLAT234_ALERT_4_C | Large Hirshfeld Difference O3 --C23              | 0.21   | Ang.   |
| PLAT234_ALERT_4_C | Large Hirshfeld Difference C20 --C24             | 0.20   | Ang.   |
| PLAT234_ALERT_4_C | Large Hirshfeld Difference C2 --C3               | 0.16   | Ang.   |
| PLAT241_ALERT_2_C | High 'MainMol' Ueq as Compared to Neighbors of   | C11    | Check  |
| PLAT241_ALERT_2_C | High 'MainMol' Ueq as Compared to Neighbors of   | C18    | Check  |
| PLAT241_ALERT_2_C | High 'MainMol' Ueq as Compared to Neighbors of   | C22    | Check  |
| PLAT241_ALERT_2_C | High 'MainMol' Ueq as Compared to Neighbors of   | C23    | Check  |
| PLAT242_ALERT_2_C | Low 'MainMol' Ueq as Compared to Neighbors of    | 01     | Check  |
| PLAT242_ALERT_2_C | Low 'MainMol' Ueq as Compared to Neighbors of    | 02     | Check  |
| PLAT242_ALERT_2_C | Low 'MainMol' Ueq as Compared to Neighbors of    | 03     | Check  |
| PLAT242_ALERT_2_C | Low 'MainMol' Ueq as Compared to Neighbors of    | 06     | Check  |
| PLAT244_ALERT_4_C | Low 'Solvent' Ueq as Compared to Neighbors of    | C3     | Check  |
| PLAT250_ALERT_2_C | Large U3/U1 Ratio for Average U(i,j) Tensor .... | 2.4    | Note   |
| PLAT334_ALERT_2_C | Small Aver. Benzene C-C Dist C1 -C6              | 1.37   | Ang.   |
| PLAT360_ALERT_2_C | Short C(sp3)-C(sp3) Bond C7 - C8                 | 1.34   | Ang.   |
| PLAT410_ALERT_2_C | Short Intra H...H Contact H7A ..H8A              | 1.98   | Ang.   |
| PLAT410_ALERT_2_C | Short Intra H...H Contact H7B ..H8B              | 1.98   | Ang.   |

---

### Alert level G

|                   |                                                  |       |        |
|-------------------|--------------------------------------------------|-------|--------|
| PLAT002_ALERT_2_G | Number of Distance or Angle Restraints on AtSite | 2     | Note   |
| PLAT003_ALERT_2_G | Number of Uiso or Uij Restrained non-H Atoms ... | 2     | Report |
| PLAT007_ALERT_5_G | Number of Unrefined Donor-H Atoms .....          | 3     | Report |
| PLAT032_ALERT_4_G | Std. Uncertainty on Flack Parameter Value High . | 0.400 | Report |
| PLAT072_ALERT_2_G | SHELXL First Parameter in WGHT Unusually Large   | 0.12  | Report |
| PLAT172_ALERT_4_G | The CIF-Embedded .res File Contains DFIX Records | 1     | Report |
| PLAT186_ALERT_4_G | The CIF-Embedded .res File Contains ISOR Records | 1     | Report |
| PLAT199_ALERT_1_G | Reported _cell_measurement_temperature .... (K)  | 293   | Check  |
| PLAT200_ALERT_1_G | Reported _diffrn_ambient_temperature .... (K)    | 293   | Check  |
| PLAT244_ALERT_4_G | Low 'Solvent' Ueq as Compared to Neighbors of    | P1    | Check  |
| PLAT860_ALERT_3_G | Number of Least-Squares Restraints .....         | 14    | Note   |

---

0 **ALERT level A** = Most likely a serious problem - resolve or explain

3 **ALERT level B** = A potentially serious problem, consider carefully

24 **ALERT level C** = Check. Ensure it is not caused by an omission or oversight

11 **ALERT level G** = General information/check it is not something unexpected

6 ALERT type 1 CIF construction/syntax error, inconsistent or missing data

20 ALERT type 2 Indicator that the structure model may be wrong or deficient  
 3 ALERT type 3 Indicator that the structure quality may be low  
 8 ALERT type 4 Improvement, methodology, query or suggestion  
 1 ALERT type 5 Informative message, check

---

## Validation response form

Please find below a validation response form (VRF) that can be filled in and pasted into your CIF.

```
# start Validation Reply Form
_vrf_ABSTY02_JJJ
;
PROBLEM: An _exptl_absorpt_correction_type has been given without
RESPONSE: ...
;
_vrf_PLAT053_JJJ
;
PROBLEM: Minimum Crystal Dimension Missing (or Error) ...      Please Check
RESPONSE: ...
;
_vrf_PLAT054_JJJ
;
PROBLEM: Medium Crystal Dimension Missing (or Error) ...      Please Check
RESPONSE: ...
;
_vrf_PLAT055_JJJ
;
PROBLEM: Maximum Crystal Dimension Missing (or Error) ...      Please Check
RESPONSE: ...
;
_vrf_PLAT082_JJJ
;
PROBLEM: High R1 Value .....      0.14 Report
RESPONSE: ...
;
_vrf_PLAT084_JJJ
;
PROBLEM: High wR2 Value (i.e. > 0.25) .....      0.30 Report
RESPONSE: ...
;
_vrf_PLAT213_JJJ
;
PROBLEM: Atom C7          has ADP max/min Ratio .....      3.7 prolat
RESPONSE: ...
;
_vrf_PLAT234_JJJ
;
PROBLEM: Large Hirshfeld Difference O3      --C23      0.21 Ang.
RESPONSE: ...
;
_vrf_PLAT241_JJJ
;
PROBLEM: High 'MainMol' Ueq as Compared to Neighbors of      C11 Check
RESPONSE: ...
;
_vrf_PLAT242_JJJ
;
PROBLEM: Low 'MainMol' Ueq as Compared to Neighbors of      01 Check
RESPONSE: ...
;
```

```

_vrf_PLAT244_JJJ
;
PROBLEM: Low      'Solvent' Ueq as Compared to Neighbors of      C3 Check
RESPONSE: ...
;
_vrf_PLAT250_JJJ
;
PROBLEM: Large U3/U1 Ratio for Average U(i,j) Tensor ....      2.4 Note
RESPONSE: ...
;
_vrf_PLAT334_JJJ
;
PROBLEM: Small Aver. Benzene C-C Dist C1      -C6      1.37 Ang.
RESPONSE: ...
;
_vrf_PLAT360_JJJ
;
PROBLEM: Short  C(sp3)-C(sp3) Bond  C7      - C8      .      1.34 Ang.
RESPONSE: ...
;
_vrf_PLAT410_JJJ
;
PROBLEM: Short Intra H...H Contact  H7A      ..H8A      1.98 Ang.
RESPONSE: ...
;
# end Validation Reply Form

```

---

It is advisable to attempt to resolve as many as possible of the alerts in all categories. Often the minor alerts point to easily fixed oversights, errors and omissions in your CIF or refinement strategy, so attention to these fine details can be worthwhile. In order to resolve some of the more serious problems it may be necessary to carry out additional measurements or structure refinements. However, the purpose of your study may justify the reported deviations and the more serious of these should normally be commented upon in the discussion or experimental section of a paper or in the "special\_details" fields of the CIF. checkCIF was carefully designed to identify outliers and unusual parameters, but every test has its limitations and alerts that are not important in a particular case may appear. Conversely, the absence of alerts does not guarantee there are no aspects of the results needing attention. It is up to the individual to critically assess their own results and, if necessary, seek expert advice.

### Publication of your CIF in IUCr journals

A basic structural check has been run on your CIF. These basic checks will be run on all CIFs submitted for publication in IUCr journals (*Acta Crystallographica*, *Journal of Applied Crystallography*, *Journal of Synchrotron Radiation*); however, if you intend to submit to *Acta Crystallographica Section C* or *E* or *IUCrData*, you should make sure that full publication checks are run on the final version of your CIF prior to submission.

### Publication of your CIF in other journals

Please refer to the *Notes for Authors* of the relevant journal for any special instructions relating to CIF submission.

---

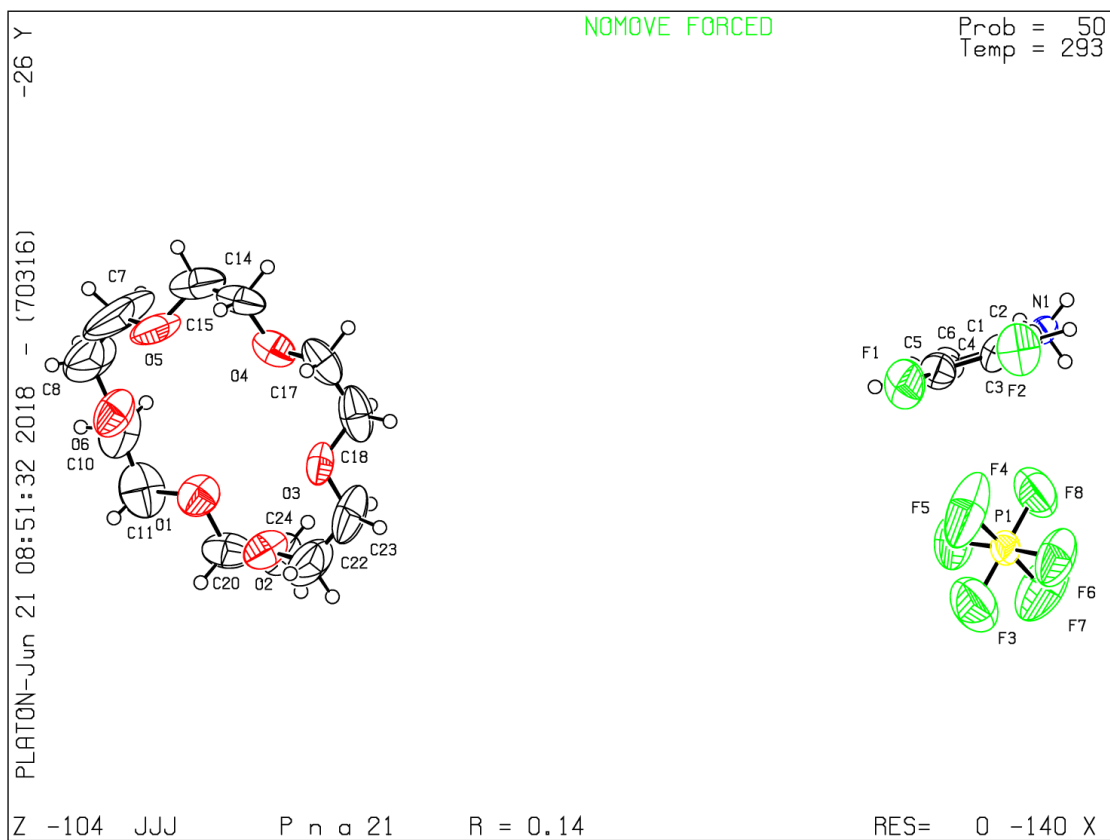

Supplement: s1 [file s1 › checkcif-1-293K.pdf]
