# Supplementary material
Source: MDPI journal article supplement (https://www.mdpi.com/2073-4352/9/4/184)
Supplement: s1 [file s1]

Archive with 5 entries (5 files):
- checkcif-1-293K.pdf
- checkcif-1-323K.pdf
- cif-293K.cif
- cif-323K .cif
- Supporting Information .docx
