# Supplementary material
Source: MDPI journal article supplement (https://www.mdpi.com/2073-4352/9/4/184)
Supplement: s1 [file s1 › cif-293K.cif]

 
data_JJJ

_audit_update_record
;
2018-06-21 # Formatted by publCIF
;
 
_audit_creation_method            'SHELXL-2014/7'
_shelx_SHELXL_version_number      '2014/7'
_chemical_name_systematic         ?
_chemical_name_common             ?
_chemical_melting_point           ?
_chemical_formula_moiety          ?
_chemical_formula_sum
 'C18 H30 F8 N O6 P' 
_chemical_formula_weight          539.40

loop_
 _atom_type_symbol
 _atom_type_description
 _atom_type_scat_dispersion_real
 _atom_type_scat_dispersion_imag
 _atom_type_scat_source
 'C'  'C'   0.0033   0.0016
 'International Tables Vol C Tables 4.2.6.8 and 6.1.1.4'
 'H'  'H'   0.0000   0.0000
 'International Tables Vol C Tables 4.2.6.8 and 6.1.1.4'
 'N'  'N'   0.0061   0.0033
 'International Tables Vol C Tables 4.2.6.8 and 6.1.1.4'
 'O'  'O'   0.0106   0.0060
 'International Tables Vol C Tables 4.2.6.8 and 6.1.1.4'
 'F'  'F'   0.0171   0.0103
 'International Tables Vol C Tables 4.2.6.8 and 6.1.1.4'
 'P'  'P'   0.1023   0.0942
 'International Tables Vol C Tables 4.2.6.8 and 6.1.1.4'
 
_space_group_crystal_system       orthorhombic
_space_group_IT_number            33
_space_group_name_H-M_alt         'P n a 21'
_space_group_name_Hall            'P 2c -2n'
 
_shelx_space_group_comment
;
The symmetry employed for this shelxl refinement is uniquely defined
by the following loop, which should always be used as a source of
symmetry information in preference to the above space-group names.
They are only intended as comments.
;
 
loop_
 _space_group_symop_operation_xyz
 'x, y, z'
 '-x, -y, z+1/2'
 'x+1/2, -y+1/2, z'
 '-x+1/2, y+1/2, z+1/2'
 
_cell_length_a                    13.425(3)
_cell_length_b                    11.817(2)
_cell_length_c                    15.660(3)
_cell_angle_alpha                 90
_cell_angle_beta                  90
_cell_angle_gamma                 90
_cell_volume                      2484.4(9)
_cell_formula_units_Z             4
_cell_measurement_temperature     293(2)
_cell_measurement_reflns_used     11511
_cell_measurement_theta_min       3.01
_cell_measurement_theta_max       27.48
 
_exptl_crystal_description        block
_exptl_crystal_colour             colorless
_exptl_crystal_density_meas       ?
_exptl_crystal_density_method     ?
_exptl_crystal_density_diffrn     1.442         
_exptl_crystal_F_000              1120
_exptl_transmission_factor_min    ?
_exptl_transmission_factor_max    ?
_exptl_crystal_size_max           ?
_exptl_crystal_size_mid           ?
_exptl_crystal_size_min           ?
_exptl_absorpt_coefficient_mu     0.203
_shelx_estimated_absorpt_T_min    ?
_shelx_estimated_absorpt_T_max    ?
_exptl_absorpt_correction_type    multi-scan
_exptl_absorpt_correction_T_min   0.7301
_exptl_absorpt_correction_T_max   1.0000
_exptl_absorpt_process_details    ?
_exptl_absorpt_special_details    ?
_diffrn_ambient_temperature       293(2)
_diffrn_radiation_wavelength      0.71073
_diffrn_radiation_type            MoK\a
_diffrn_source                    ?
_diffrn_measurement_device_type   'rigaku saturn 724'
_diffrn_measurement_method        ?
_diffrn_detector_area_resol_mean  ?
_diffrn_reflns_number             15251
_diffrn_reflns_av_unetI/netI      0.0906
_diffrn_reflns_av_R_equivalents   0.0654
_diffrn_reflns_limit_h_min        -16
_diffrn_reflns_limit_h_max        17
_diffrn_reflns_limit_k_min        -15
_diffrn_reflns_limit_k_max        15
_diffrn_reflns_limit_l_min        -19
_diffrn_reflns_limit_l_max        20
_diffrn_reflns_theta_min          3.035
_diffrn_reflns_theta_max          27.467
_diffrn_reflns_theta_full         25.242
_diffrn_measured_fraction_theta_max   0.990
_diffrn_measured_fraction_theta_full  0.998
_diffrn_reflns_Laue_measured_fraction_max    0.990
_diffrn_reflns_Laue_measured_fraction_full   0.998
_diffrn_reflns_point_group_measured_fraction_max   0.990
_diffrn_reflns_point_group_measured_fraction_full  0.998
_reflns_number_total              5528
_reflns_number_gt                 3147
_reflns_threshold_expression      'I > 2\s(I)'
_reflns_Friedel_coverage          0.930
_reflns_Friedel_fraction_max      0.991
_reflns_Friedel_fraction_full     0.999
 
_reflns_special_details
;
 Reflections were merged by SHELXL according to the crystal
 class for the calculation of statistics and refinement.
 
 _reflns_Friedel_fraction is defined as the number of unique
 Friedel pairs measured divided by the number that would be
 possible theoretically, ignoring centric projections and
 systematic absences.
;
 
_computing_data_collection        ?
_computing_cell_refinement        ?
_computing_data_reduction         ?
_computing_structure_solution     ?
_computing_structure_refinement 'SHELXL-2014/7 (Sheldrick, 2014)'
_computing_molecular_graphics     ?
_computing_publication_material   ?
_refine_special_details
;
 Refined as a 2-component inversion twin.
;
_refine_ls_structure_factor_coef  Fsqd
_refine_ls_matrix_type            full
_refine_ls_weighting_scheme       calc
_refine_ls_weighting_details
'w=1/[\s^2^(Fo^2^)+(0.1170P)^2^+0.9847P] where P=(Fo^2^+2Fc^2^)/3'
_atom_sites_solution_primary      ?
_atom_sites_solution_secondary    ?
_atom_sites_solution_hydrogens    geom
_refine_ls_hydrogen_treatment     constr
_refine_ls_extinction_method      none
_refine_ls_extinction_coef        .
_refine_ls_abs_structure_details
;
 Refined as an inversion twin.
;
_refine_ls_abs_structure_Flack    0.1(4)
_chemical_absolute_configuration  ?
_refine_ls_number_reflns          5528
_refine_ls_number_parameters      309
_refine_ls_number_restraints      14
_refine_ls_R_factor_all           0.2212
_refine_ls_R_factor_gt            0.1370
_refine_ls_wR_factor_ref          0.2955
_refine_ls_wR_factor_gt           0.2590
_refine_ls_goodness_of_fit_ref    1.208
_refine_ls_restrained_S_all       1.214
_refine_ls_shift/su_max           0.005
_refine_ls_shift/su_mean          0.001
 
loop_
 _atom_site_label
 _atom_site_type_symbol
 _atom_site_fract_x
 _atom_site_fract_y
 _atom_site_fract_z
 _atom_site_U_iso_or_equiv
 _atom_site_adp_type
 _atom_site_occupancy
 _atom_site_site_symmetry_order  
 _atom_site_calc_flag
 _atom_site_refinement_flags_posn
 _atom_site_refinement_flags_adp
 _atom_site_refinement_flags_occupancy
 _atom_site_disorder_assembly
 _atom_site_disorder_group
P1 P 0.0219(3) 0.9670(2) 0.8718(2) 0.0642(9) Uani 1 1 d . . . . .
C1 C 0.4248(6) 0.9838(8) 0.9653(6) 0.039(2) Uani 1 1 d . . . . .
O3 O 0.3728(7) 0.1811(7) 0.1344(5) 0.076(2) Uani 1 1 d . . . . .
C17 C 0.5029(12) 0.2998(11) 0.0862(10) 0.089(4) Uani 1 1 d . . . . .
H17A H 0.4663 0.3157 0.0342 0.107 Uiso 1 1 calc R U . . .
H17B H 0.5413 0.3665 0.1011 0.107 Uiso 1 1 calc R U . . .
O4 O 0.5682(7) 0.2060(7) 0.0729(6) 0.080(3) Uani 1 1 d . . . . .
C6 C 0.4255(8) 0.8843(8) 0.9188(7) 0.053(3) Uani 1 1 d . . . . .
H6 H 0.4539 0.8188 0.9409 0.064 Uiso 1 1 calc R U . . .
C2 C 0.3820(7) 1.0801(8) 0.9334(6) 0.046(2) Uani 1 1 d . . . . .
H2 H 0.3813 1.1461 0.9658 0.055 Uiso 1 1 calc R U . . .
O1 O 0.4926(7) -0.1873(8) 0.1836(6) 0.086(3) Uani 1 1 d . . . . .
C14 C 0.7110(12) 0.1338(19) 0.0062(10) 0.108(6) Uani 1 1 d . . . . .
H14A H 0.7626 0.1525 -0.0348 0.130 Uiso 1 1 calc R U . . .
H14B H 0.7420 0.1256 0.0618 0.130 Uiso 1 1 calc R U . . .
O6 O 0.6183(8) -0.1869(9) 0.0435(7) 0.096(3) Uani 1 1 d . . . . .
O5 O 0.6655(7) 0.0308(10) -0.0173(8) 0.107(4) Uani 1 1 d . . . . .
C18 C 0.4319(13) 0.2725(13) 0.1566(10) 0.098(5) Uani 1 1 d . . . . .
H18A H 0.4688 0.2549 0.2082 0.118 Uiso 1 1 calc R U . . .
H18B H 0.3901 0.3377 0.1681 0.118 Uiso 1 1 calc R U . . .
C3 C 0.3401(8) 1.0789(9) 0.8536(5) 0.052(3) Uani 1 1 d . . . . .
C5 C 0.3831(9) 0.8852(11) 0.8386(9) 0.074(3) Uani 1 1 d . . . . .
H5 H 0.3837 0.8195 0.8059 0.088 Uiso 1 1 calc R U . . .
C20 C 0.4071(11) -0.2054(15) 0.2339(10) 0.092(5) Uani 1 1 d . . . . .
H20A H 0.4262 -0.2412 0.2871 0.110 Uiso 1 1 calc R U . . .
H20B H 0.3621 -0.2561 0.2041 0.110 Uiso 1 1 calc R U . . .
C15 C 0.6372(11) 0.2259(13) 0.0093(10) 0.088(4) Uani 1 1 d . . . . .
H15A H 0.6707 0.2972 0.0200 0.106 Uiso 1 1 calc R U . . .
H15B H 0.6035 0.2314 -0.0454 0.106 Uiso 1 1 calc R U . . .
C4 C 0.3406(9) 0.9800(13) 0.8071(8) 0.072(3) Uani 1 1 d . . . . .
C7 C 0.731(2) -0.054(2) -0.014(3) 0.244(18) Uani 1 1 d D U . . .
H7A H 0.7770 -0.0382 0.0318 0.293 Uiso 1 1 calc R U . . .
H7B H 0.7694 -0.0516 -0.0669 0.293 Uiso 1 1 calc R U . . .
C11 C 0.5423(15) -0.2880(13) 0.1539(12) 0.114(6) Uani 1 1 d . . . . .
H11A H 0.4990 -0.3290 0.1152 0.137 Uiso 1 1 calc R U . . .
H11B H 0.5572 -0.3368 0.2020 0.137 Uiso 1 1 calc R U . . .
C8 C 0.7002(16) -0.161(2) -0.004(2) 0.164(10) Uani 1 1 d D U . . .
H8A H 0.7556 -0.2035 0.0195 0.197 Uiso 1 1 calc R U . . .
H8B H 0.6885 -0.1917 -0.0611 0.197 Uiso 1 1 calc R U . . .
C10 C 0.6346(14) -0.2581(16) 0.1099(11) 0.107(5) Uani 1 1 d . . . . .
H10A H 0.6798 -0.2224 0.1501 0.129 Uiso 1 1 calc R U . . .
H10B H 0.6663 -0.3265 0.0890 0.129 Uiso 1 1 calc R U . . .
F5 F 0.0850(7) 0.8533(7) 0.8651(6) 0.114(3) Uani 1 1 d . . . . .
F2 F 0.2971(6) 1.1710(6) 0.8224(5) 0.096(2) Uani 1 1 d . . . . .
F4 F 0.0597(14) 0.9969(8) 0.7821(8) 0.195(8) Uani 1 1 d . . . . .
N1 N 0.4724(5) 0.9870(6) 1.0500(5) 0.0403(18) Uani 1 1 d . . . . .
H1A H 0.5016 1.0539 1.0575 0.060 Uiso 1 1 calc R U . . .
H1B H 0.5178 0.9324 1.0534 0.060 Uiso 1 1 calc R U . . .
H1C H 0.4264 0.9767 1.0902 0.060 Uiso 1 1 calc R U . . .
F6 F -0.0458(8) 1.0769(7) 0.8781(6) 0.131(4) Uani 1 1 d . . . . .
F3 F -0.0663(8) 0.9019(10) 0.8324(9) 0.167(5) Uani 1 1 d . . . . .
F1 F 0.2968(6) 0.9804(8) 0.7281(5) 0.104(3) Uani 1 1 d . . . . .
O2 O 0.3235(7) -0.0494(8) 0.1767(7) 0.088(3) Uani 1 1 d . . . . .
F7 F -0.0184(10) 0.9331(12) 0.9606(7) 0.160(5) Uani 1 1 d . . . . .
F8 F 0.1080(9) 1.0305(14) 0.9097(14) 0.241(10) Uani 1 1 d . . . . .
C22 C 0.2573(13) 0.0438(19) 0.1826(15) 0.131(7) Uani 1 1 d . . . . .
H22A H 0.2093 0.0286 0.2274 0.157 Uiso 1 1 calc R U . . .
H22B H 0.2209 0.0501 0.1293 0.157 Uiso 1 1 calc R U . . .
C23 C 0.3048(15) 0.1502(17) 0.2000(11) 0.123(7) Uani 1 1 d . . . . .
H23A H 0.2544 0.2085 0.2055 0.147 Uiso 1 1 calc R U . . .
H23B H 0.3402 0.1452 0.2539 0.147 Uiso 1 1 calc R U . . .
C24 C 0.3558(13) -0.0991(16) 0.2522(10) 0.101(5) Uani 1 1 d . . . . .
H24A H 0.2992 -0.1135 0.2891 0.121 Uiso 1 1 calc R U . . .
H24B H 0.4006 -0.0481 0.2817 0.121 Uiso 1 1 calc R U . . .
 
loop_
 _atom_site_aniso_label
 _atom_site_aniso_U_11
 _atom_site_aniso_U_22
 _atom_site_aniso_U_33
 _atom_site_aniso_U_23
 _atom_site_aniso_U_13
 _atom_site_aniso_U_12
P1 0.084(2) 0.0427(13) 0.0658(19) -0.0061(15) 0.0211(18) -0.0076(15)
C1 0.016(4) 0.052(6) 0.050(6) 0.003(5) 0.014(4) -0.006(4)
O3 0.090(6) 0.071(6) 0.066(5) -0.023(4) 0.016(5) 0.016(5)
C17 0.122(11) 0.046(7) 0.099(11) -0.001(8) -0.035(10) -0.003(8)
O4 0.086(6) 0.067(5) 0.087(6) 0.010(5) -0.016(5) -0.019(5)
C6 0.050(6) 0.039(5) 0.071(7) -0.006(5) -0.007(6) 0.003(5)
C2 0.048(5) 0.037(5) 0.052(6) -0.011(5) 0.005(5) 0.012(4)
O1 0.099(7) 0.075(6) 0.082(6) 0.022(5) 0.014(6) 0.007(5)
C14 0.066(9) 0.170(18) 0.088(11) 0.035(11) 0.004(8) -0.037(12)
O6 0.099(8) 0.088(7) 0.102(7) 0.011(6) 0.022(6) 0.041(6)
O5 0.060(5) 0.113(8) 0.146(10) 0.021(7) 0.047(6) -0.005(6)
C18 0.128(13) 0.083(10) 0.084(10) -0.028(8) -0.050(10) 0.039(10)
C3 0.065(6) 0.068(7) 0.022(5) 0.010(5) -0.002(5) 0.016(5)
C5 0.071(7) 0.069(8) 0.081(9) -0.037(7) -0.008(7) -0.007(6)
C20 0.091(10) 0.107(12) 0.076(9) 0.040(9) -0.010(8) -0.031(9)
C15 0.077(9) 0.094(11) 0.094(10) 0.020(8) -0.011(8) -0.045(9)
C4 0.055(7) 0.092(10) 0.070(9) -0.017(8) -0.013(6) 0.001(7)
C7 0.14(2) 0.18(3) 0.41(5) 0.05(3) 0.19(3) 0.05(2)
C11 0.157(17) 0.067(10) 0.117(14) 0.022(10) -0.018(13) 0.028(11)
C8 0.113(16) 0.110(16) 0.27(3) -0.008(16) 0.086(18) 0.032(13)
C10 0.121(13) 0.111(13) 0.091(11) 0.008(10) -0.013(10) 0.063(11)
F5 0.140(7) 0.092(5) 0.109(6) -0.009(5) -0.001(6) 0.048(5)
F2 0.121(6) 0.090(5) 0.078(5) 0.012(4) -0.030(4) 0.028(4)
F4 0.35(2) 0.093(7) 0.145(9) 0.043(7) 0.138(12) 0.080(10)
N1 0.035(4) 0.042(4) 0.045(4) 0.005(3) 0.002(4) 0.009(3)
F6 0.174(9) 0.089(5) 0.132(8) 0.008(5) 0.054(7) 0.053(6)
F3 0.116(7) 0.153(9) 0.234(14) -0.083(10) -0.038(9) 0.008(7)
F1 0.103(5) 0.151(8) 0.058(4) -0.025(5) -0.031(4) 0.008(5)
O2 0.076(6) 0.095(7) 0.094(7) 0.018(6) 0.020(5) 0.009(5)
F7 0.198(11) 0.191(11) 0.092(6) 0.050(7) 0.044(7) 0.078(10)
F8 0.104(7) 0.230(14) 0.39(2) -0.217(17) 0.034(11) -0.040(8)
C22 0.099(12) 0.123(16) 0.170(19) -0.006(14) 0.056(13) 0.033(12)
C23 0.146(16) 0.110(14) 0.113(14) -0.016(11) 0.038(13) 0.067(13)
C24 0.101(11) 0.114(13) 0.087(11) -0.007(10) 0.026(9) 0.000(11)
 
_geom_special_details
;
 All esds (except the esd in the dihedral angle between two l.s. planes)
 are estimated using the full covariance matrix.  The cell esds are taken
 into account individually in the estimation of esds in distances, angles
 and torsion angles; correlations between esds in cell parameters are only
 used when they are defined by crystal symmetry.  An approximate (isotropic)
 treatment of cell esds is used for estimating esds involving l.s. planes.
;
 
loop_
 _geom_bond_atom_site_label_1
 _geom_bond_atom_site_label_2
 _geom_bond_distance
 _geom_bond_site_symmetry_2
 _geom_bond_publ_flag
P1 F8 1.500(12) . ?
P1 F4 1.534(11) . ?
P1 F3 1.542(10) . ?
P1 F7 1.545(10) . ?
P1 F6 1.588(8) . ?
P1 F5 1.593(8) . ?
C1 C2 1.370(13) . ?
C1 C6 1.382(13) . ?
C1 N1 1.473(12) . ?
O3 C18 1.384(18) . ?
O3 C23 1.422(19) . ?
C17 O4 1.429(16) . ?
C17 C18 1.49(2) . ?
O4 C15 1.380(16) . ?
C6 C5 1.378(16) . ?
C2 C3 1.371(13) . ?
O1 C20 1.408(16) . ?
O1 C11 1.441(18) . ?
C14 O5 1.41(2) . ?
C14 C15 1.47(2) . ?
O6 C10 1.356(18) . ?
O6 C8 1.37(2) . ?
O5 C7 1.34(3) . ?
C3 F2 1.326(11) . ?
C3 C4 1.376(16) . ?
C5 C4 1.351(18) . ?
C20 C24 1.46(2) . ?
C4 F1 1.370(14) . ?
C7 C8 1.34(2) . ?
C11 C10 1.46(2) . ?
O2 C24 1.389(18) . ?
O2 C22 1.418(19) . ?
C22 C23 1.44(3) . ?
 
loop_
 _geom_angle_atom_site_label_1
 _geom_angle_atom_site_label_2
 _geom_angle_atom_site_label_3
 _geom_angle
 _geom_angle_site_symmetry_1
 _geom_angle_site_symmetry_3
 _geom_angle_publ_flag
F8 P1 F4 89.5(12) . . ?
F8 P1 F3 179.6(11) . . ?
F4 P1 F3 90.1(10) . . ?
F8 P1 F7 92.5(10) . . ?
F4 P1 F7 177.8(9) . . ?
F3 P1 F7 87.9(9) . . ?
F8 P1 F6 90.4(8) . . ?
F4 P1 F6 93.3(5) . . ?
F3 P1 F6 89.6(6) . . ?
F7 P1 F6 87.5(6) . . ?
F8 P1 F5 92.2(7) . . ?
F4 P1 F5 87.5(5) . . ?
F3 P1 F5 87.7(5) . . ?
F7 P1 F5 91.6(6) . . ?
F6 P1 F5 177.2(6) . . ?
C2 C1 C6 121.2(9) . . ?
C2 C1 N1 119.2(8) . . ?
C6 C1 N1 119.6(9) . . ?
C18 O3 C23 112.8(12) . . ?
O4 C17 C18 109.4(11) . . ?
C15 O4 C17 112.6(11) . . ?
C5 C6 C1 118.1(10) . . ?
C1 C2 C3 119.7(9) . . ?
C20 O1 C11 115.7(13) . . ?
O5 C14 C15 110.8(12) . . ?
C10 O6 C8 115.4(16) . . ?
C7 O5 C14 110.8(18) . . ?
O3 C18 C17 110.5(11) . . ?
F2 C3 C2 120.4(9) . . ?
F2 C3 C4 120.3(9) . . ?
C2 C3 C4 119.3(10) . . ?
C4 C5 C6 120.9(11) . . ?
O1 C20 C24 111.3(12) . . ?
O4 C15 C14 110.4(12) . . ?
C5 C4 F1 120.9(12) . . ?
C5 C4 C3 120.9(11) . . ?
F1 C4 C3 118.2(12) . . ?
O5 C7 C8 121(2) . . ?
O1 C11 C10 110.2(13) . . ?
C7 C8 O6 121.5(17) . . ?
O6 C10 C11 112.0(13) . . ?
C24 O2 C22 118.0(13) . . ?
O2 C22 C23 114.5(15) . . ?
O3 C23 C22 111.9(13) . . ?
O2 C24 C20 110.1(13) . . ?
 
loop_
 _geom_hbond_atom_site_label_D 
 _geom_hbond_atom_site_label_H 
 _geom_hbond_atom_site_label_A 
 _geom_hbond_distance_DH 
 _geom_hbond_distance_HA 
 _geom_hbond_distance_DA 
 _geom_hbond_angle_DHA 
 _geom_hbond_site_symmetry_A 
N1 H1C O2  0.89 1.96 2.850(12) 178.3 1_566
N1 H1B O6  0.89 1.96 2.841(11) 172.0 1_566
N1 H1B O1  0.89 2.50 2.949(11) 111.5 1_566
N1 H1A O4  0.89 2.02 2.912(11) 179.3 1_566
 
_refine_diff_density_max    0.380
_refine_diff_density_min   -0.226
_refine_diff_density_rms    0.070

_shelx_res_file
;

    JJJ.res created by SHELXL-2014/7

TITL JJJ in Pna2(1)
CELL 0.71073  13.4251  11.8173  15.6595  90.000  90.000  90.000
ZERR   4   0.0027   0.0024   0.0031   0.000   0.000   0.000
LATT -1
SYMM -X, -Y, 0.5+Z
SYMM 0.5+X, 0.5-Y, Z
SYMM 0.5-X, 0.5+Y, 0.5+Z
SFAC C  H  N  O  F  P
UNIT 72 104 4 24 32 4
L.S. 14
ACTA
BOND
FMAP 2
PLAN 5
HTAB N1 O2_$2
HTAB N1 O6_$2
HTAB N1 O1_$2
HTAB N1 O4_$2
EQIV $2 x, y+1, z+1
HTAB C8 F1_$1
EQIV $1 x+1/2, -y+1/2, z-1
twin
isor c7 c8
dfix 1.5 c7 c8
HTAB
WGHT    0.117000    0.984700
BASF   0.14045
FVAR       0.13443
MOLE 1
P1    6    0.021894    0.967039    0.871834    11.00000    0.08404    0.04274 =
         0.06578   -0.00613    0.02106   -0.00760
C1    1    0.424800    0.983763    0.965277    11.00000    0.01603    0.05195 =
         0.04990    0.00334    0.01433   -0.00583
O3    4    0.372789    0.181086    0.134398    11.00000    0.09027    0.07143 =
         0.06577   -0.02311    0.01578    0.01566
C17   1    0.502884    0.299808    0.086245    11.00000    0.12196    0.04571 =
         0.09883   -0.00072   -0.03495   -0.00348
AFIX  23
H17A  2    0.466287    0.315745    0.034208    11.00000   -1.20000
H17B  2    0.541320    0.366472    0.101091    11.00000   -1.20000
AFIX   0
O4    4    0.568225    0.205959    0.072904    11.00000    0.08564    0.06689 =
         0.08659    0.01048   -0.01561   -0.01904
C6    1    0.425533    0.884333    0.918795    11.00000    0.04963    0.03889 =
         0.07118   -0.00639   -0.00707    0.00309
AFIX  43
H6    2    0.453851    0.818783    0.940947    11.00000   -1.20000
AFIX   0
C2    1    0.381993    1.080107    0.933407    11.00000    0.04751    0.03690 =
         0.05226   -0.01147    0.00545    0.01249
AFIX  43
H2    2    0.381338    1.146071    0.965792    11.00000   -1.20000
AFIX   0
O1    4    0.492552   -0.187326    0.183552    11.00000    0.09922    0.07510 =
         0.08239    0.02167    0.01397    0.00661
C14   1    0.711009    0.133793    0.006205    11.00000    0.06592    0.17014 =
         0.08796    0.03522    0.00396   -0.03691
AFIX  23
H14A  2    0.762619    0.152535   -0.034773    11.00000   -1.20000
H14B  2    0.742021    0.125576    0.061808    11.00000   -1.20000
AFIX   0
O6    4    0.618291   -0.186878    0.043527    11.00000    0.09869    0.08810 =
         0.10200    0.01104    0.02202    0.04125
O5    4    0.665516    0.030768   -0.017303    11.00000    0.06008    0.11337 =
         0.14618    0.02078    0.04685   -0.00454
C18   1    0.431888    0.272471    0.156593    11.00000    0.12838    0.08321 =
         0.08380   -0.02822   -0.04963    0.03859
AFIX  23
H18A  2    0.468796    0.254897    0.208167    11.00000   -1.20000
H18B  2    0.390095    0.337668    0.168107    11.00000   -1.20000
AFIX   0
C3    1    0.340101    1.078908    0.853551    11.00000    0.06545    0.06837 =
         0.02159    0.01019   -0.00242    0.01603
C5    1    0.383069    0.885157    0.838649    11.00000    0.07073    0.06896 =
         0.08133   -0.03698   -0.00820   -0.00703
AFIX  43
H5    2    0.383663    0.819549    0.805854    11.00000   -1.20000
AFIX   0
C20   1    0.407075   -0.205403    0.233872    11.00000    0.09149    0.10706 =
         0.07624    0.03983   -0.01012   -0.03123
AFIX  23
H20A  2    0.426201   -0.241248    0.287130    11.00000   -1.20000
H20B  2    0.362098   -0.256068    0.204067    11.00000   -1.20000
AFIX   0
C15   1    0.637182    0.225864    0.009268    11.00000    0.07705    0.09379 =
         0.09411    0.02032   -0.01143   -0.04475
AFIX  23
H15A  2    0.670735    0.297167    0.019957    11.00000   -1.20000
H15B  2    0.603452    0.231353   -0.045354    11.00000   -1.20000
AFIX   0
C4    1    0.340588    0.980027    0.807094    11.00000    0.05487    0.09215 =
         0.06979   -0.01724   -0.01325    0.00058
C7    1    0.731125   -0.054341   -0.014429    11.00000    0.14358    0.17551 =
         0.41304    0.05034    0.18744    0.04615
AFIX  23
H7A   2    0.777011   -0.038179    0.031838    11.00000   -1.20000
H7B   2    0.769430   -0.051575   -0.066909    11.00000   -1.20000
AFIX   0
C11   1    0.542348   -0.287967    0.153887    11.00000    0.15720    0.06748 =
         0.11680    0.02194   -0.01820    0.02846
AFIX  23
H11A  2    0.498994   -0.329017    0.115210    11.00000   -1.20000
H11B  2    0.557204   -0.336782    0.202030    11.00000   -1.20000
AFIX   0
C8    1    0.700183   -0.161347   -0.004416    11.00000    0.11260    0.11010 =
         0.27021   -0.00815    0.08569    0.03234
AFIX  23
H8A   2    0.755571   -0.203453    0.019510    11.00000   -1.20000
H8B   2    0.688515   -0.191674   -0.061101    11.00000   -1.20000
AFIX   0
C10   1    0.634641   -0.258087    0.109929    11.00000    0.12058    0.11107 =
         0.09053    0.00783   -0.01307    0.06251
AFIX  23
H10A  2    0.679777   -0.222424    0.150120    11.00000   -1.20000
H10B  2    0.666282   -0.326479    0.089015    11.00000   -1.20000
AFIX   0
F5    5    0.085039    0.853275    0.865098    11.00000    0.14039    0.09167 =
         0.10898   -0.00919   -0.00080    0.04795
F2    5    0.297059    1.171036    0.822411    11.00000    0.12054    0.08999 =
         0.07794    0.01193   -0.02981    0.02840
F4    5    0.059697    0.996855    0.782141    11.00000    0.34670    0.09261 =
         0.14469    0.04328    0.13826    0.07976
N1    3    0.472369    0.987021    1.049974    11.00000    0.03452    0.04169 =
         0.04468    0.00452    0.00237    0.00878
AFIX 137
H1A   2    0.501599    1.053883    1.057478    11.00000   -1.50000
H1B   2    0.517839    0.932407    1.053434    11.00000   -1.50000
H1C   2    0.426420    0.976741    1.090201    11.00000   -1.50000
AFIX   0
F6    5   -0.045784    1.076933    0.878061    11.00000    0.17364    0.08899 =
         0.13174    0.00767    0.05416    0.05253
F3    5   -0.066294    0.901888    0.832352    11.00000    0.11560    0.15276 =
         0.23388   -0.08332   -0.03777    0.00795
F1    5    0.296752    0.980406    0.728097    11.00000    0.10271    0.15087 =
         0.05838   -0.02515   -0.03120    0.00761
O2    4    0.323494   -0.049425    0.176728    11.00000    0.07560    0.09486 =
         0.09426    0.01811    0.01983    0.00862
F7    5   -0.018400    0.933142    0.960623    11.00000    0.19772    0.19083 =
         0.09231    0.05042    0.04422    0.07832
F8    5    0.108018    1.030520    0.909698    11.00000    0.10391    0.22959 =
         0.38978   -0.21671    0.03395   -0.03959
C22   1    0.257330    0.043757    0.182587    11.00000    0.09880    0.12317 =
         0.17026   -0.00556    0.05622    0.03301
AFIX  23
H22A  2    0.209300    0.028573    0.227422    11.00000   -1.20000
H22B  2    0.220934    0.050071    0.129289    11.00000   -1.20000
AFIX   0
C23   1    0.304813    0.150160    0.199999    11.00000    0.14595    0.10980 =
         0.11281   -0.01578    0.03830    0.06671
AFIX  23
H23A  2    0.254394    0.208499    0.205509    11.00000   -1.20000
H23B  2    0.340212    0.145176    0.253868    11.00000   -1.20000
AFIX   0
C24   1    0.355792   -0.099142    0.252164    11.00000    0.10113    0.11437 =
         0.08669   -0.00695    0.02574    0.00046
AFIX  23
H24A  2    0.299153   -0.113499    0.289066    11.00000   -1.20000
H24B  2    0.400645   -0.048053    0.281692    11.00000   -1.20000
AFIX   0
HKLF 4

REM  JJJ in Pna2(1)
REM R1 =  0.1370 for    3147 Fo > 4sig(Fo)  and  0.2212 for all    5528 data
REM    309 parameters refined using     14 restraints

END

WGHT      0.1100      1.2517

REM Instructions for potential hydrogen bonds
HTAB C8 F5_$1
HTAB N1 O4_$2
HTAB N1 O1_$2
HTAB N1 O6_$2
HTAB N1 O2_$2

REM Highest difference peak  0.380,  deepest hole -0.226,  1-sigma level  0.070
Q1    1   0.0827  0.9820  0.9640  11.00000  0.05    0.38
Q2    1   0.0344  1.0592  0.8712  11.00000  0.05    0.37
Q3    1   0.0021  0.8838  0.8755  11.00000  0.05    0.36
Q4    1   0.0149  1.0413  0.8905  11.00000  0.05    0.35
Q5    1   0.0456  1.0940  0.8754  11.00000  0.05    0.34
;
_shelx_res_checksum   45801

_shelx_hkl_file
;
   0   0   3    0.11    0.06
   0   0  -3    0.24    0.09
   0   0  -4   30.91    0.83
   0   0  -5   -0.04    0.12
   0   0  -6  123.98    2.85
   0   0  -7   -0.10    0.15
   0   0   8   27.95    1.12
   0   0  -8   19.20    0.79
   0   0  -9    0.15    0.16
   0   0   9    0.09    0.28
   0   0 -10   26.51    1.10
   0   0  10   31.36    1.49
   0   0  11    0.05    0.34
   0   0 -11    0.33    0.23
   0   0  12    4.70    0.64
   0   0 -12    2.01    0.39
   0   0  13    0.54    0.41
   0   0 -13    0.16    0.24
   0   0  14    3.31    0.67
   0   0 -15    0.05    0.27
   0   0  15    0.39    0.44
   0   0  16    2.77    0.85
   0   0 -16    2.88    0.56
   0   0  17    0.71    0.67
   0   0  18   -0.36    0.67
   0   0  19    0.48    0.75
  -1   0   2    0.19    0.04
  -1   0   2    0.20    0.07
  -1   0   2    0.25    0.03
   1   0  -2    0.25    0.07
   1   0   2    0.26    0.04
   1   0   2    0.19    0.07
  -1   0  -2    0.17    0.03
   1   0   3    0.07    0.05
   1   0  -3    0.07    0.09
  -1   0   3    0.11    0.05
  -1   0   3    0.13    0.05
  -1   0  -3    0.02    0.11
   1   0  -4   -0.05    0.10
  -1   0  -4    0.02    0.15
  -1   0   4    0.05    0.10
  -1   0  -4    0.33    0.07
  -1   0  -5    0.22    0.07
   1   0  -5    0.10    0.10
  -1   0   5   -0.03    0.11
  -1   0  -5   -0.05    0.12
   1   0  -6    0.32    0.14
  -1   0  -6    0.10    0.16
  -1   0  -6    0.41    0.10
  -1   0   6    0.01    0.13
   1   0  -7   -0.05    0.18
  -1   0  -7    0.30    0.12
  -1   0   7    0.49    0.18
  -1   0  -7   -0.07    0.22
  -1   0   8    0.22    0.22
   1   0  -8    0.01    0.18
  -1   0  -8    0.38    0.14
  -1   0   9    0.08    0.21
  -1   0  -9   -0.15    0.23
   1   0  -9    0.04    0.20
  -1   0  -9    0.35    0.15
  -1   0  10   -0.01    0.24
  -1   0 -10    0.38    0.17
   1   0 -10    0.00    0.23
   1   0  10    0.13    0.35
  -1   0  11    0.51    0.31
  -1   0 -11    0.38    0.21
   1   0  11   -0.19    0.35
   1   0 -11    0.14    0.27
  -1   0  12    0.01    0.29
  -1   0 -12    0.52    0.23
   1   0  12    0.02    0.41
   1   0 -12    0.12    0.29
  -1   0  13    0.31    0.38
   1   0  13    0.94    0.45
  -1   0 -13    0.17    0.25
   1   0 -13    0.08    0.28
   1   0  14    0.00    0.46
   1   0 -14    0.57    0.29
  -1   0  14   -0.03    0.37
  -1   0 -14    0.16    0.27
  -1   0 -15   -0.04    0.32
  -1   0  15    0.39    0.45
   1   0  15    0.34    0.47
   1   0  16    0.35    0.59
  -1   0  16    0.05    0.62
   1   0 -16    1.56    0.42
   1   0  17   -0.14    0.54
  -1   0  17   -0.13    0.44
   1   0  18    0.69    0.72
  -1   0  18    0.27    0.62
  -1   0  19    0.90    0.77
   1   0  20    1.22    0.98
   2   0   0  327.46    3.22
  -2   0   0  343.01    4.07
  -2   0  -1   31.75    0.65
  -2   0   1   31.78    0.36
   2   0  -1   32.38    0.36
   2   0   1   32.72    0.60
  -2   0  -1   30.99    0.59
   2   0  -1   34.20    0.71
   2   0   1   30.18    0.64
   2   0  -2  100.30    1.91
   2   0   2   93.02    1.32
   2   0  -2   94.83    0.89
  -2   0  -2   90.43    1.73
  -2   0  -2   90.64    1.36
  -2   0   2   95.93    0.83
   2   0  -3  595.26    8.72
  -2   0  -3  602.84    8.94
   2   0  -3  586.93    5.50
  -2   0   3  600.55    5.33
   2   0   3  594.15    6.40
  -2   0   4  386.82    4.80
  -2   0  -4  391.39    7.22
   2   0   4  392.61    4.89
   2   0  -4  383.12    6.68
   2   0   5   25.60    0.63
  -2   0   5   24.96    0.66
   2   0  -5   25.40    0.91
  -2   0  -5   24.48    0.99
  -2   0   6   60.34    1.43
  -2   0  -6   61.92    1.99
   2   0  -6   62.57    1.81
   2   0   6   60.81    1.30
  -2   0  -7   38.79    1.57
   2   0   7   38.95    1.04
   2   0  -7   39.76    1.44
  -2   0   7   39.27    1.16
   2   0   8    3.62    0.27
   2   0  -8    3.79    0.45
  -2   0  -8    3.43    0.51
  -2   0   8    3.50    0.33
  -2   0  -9   58.96    2.46
   2   0   9   58.90    1.63
  -2   0   9   60.28    1.98
   2   0  -9   62.60    2.22
  -2   0 -10   84.94    3.22
   2   0  10   83.55    2.26
  -2   0  10   84.81    2.75
   2   0 -10   84.83    2.92
  -2   0  11    3.16    0.49
   2   0 -11    2.48    0.52
   2   0  11    2.41    0.33
   2   0  11    2.79    0.70
   2   0  12   16.82    1.43
   2   0 -12   15.52    1.10
   2   0  12   15.73    0.78
  -2   0  12   15.88    1.09
   2   0  13    1.06    0.57
   2   0  13    0.71    0.26
   2   0 -13    0.88    0.44
  -2   0  13    0.97    0.38
   2   0  14    0.19    0.56
   2   0  14    0.63    0.25
  -2   0  14    0.34    0.38
   2   0 -14    0.68    0.45
   2   0 -15    1.01    0.43
  -2   0  15    1.50    0.51
   2   0  15    0.80    0.30
   2   0  15    0.77    0.68
  -2   0  16    0.71    0.45
   2   0 -16    0.45    0.41
   2   0  17    1.66    0.74
   2   0 -17    0.74    0.51
  -2   0  17    0.98    0.63
  -2   0  18    4.60    0.75
   2   0  18    1.75    1.07
   2   0  19    2.35    1.10
   2   0  20    1.02    1.00
   3   0   0   -0.01    0.05
   3   0   0    0.08    0.09
   3   0  -1    0.19    0.12
   3   0  -1    0.02    0.04
   3   0   1    0.28    0.10
  -3   0   1    0.18    0.05
  -3   0  -1    0.04    0.10
   3   0   2    0.03    0.08
   3   0  -2   -0.01    0.12
   3   0  -2    0.06    0.03
  -3   0   2    0.01    0.03
  -3   0  -2    0.33    0.11
  -3   0  -3    0.06    0.15
   3   0  -3   -0.04    0.16
  -3   0   3    0.17    0.04
   3   0  -3    0.12    0.04
   3   0   3    0.01    0.08
  -3   0   4    0.04    0.04
   3   0   4    0.04    0.07
   3   0  -4   -0.01    0.15
  -3   0  -4   -0.02    0.16
  -3   0   5    0.00    0.06
   3   0  -5   -0.02    0.16
   3   0   5    0.07    0.09
  -3   0  -5   -0.01    0.18
  -3   0   6    0.00    0.08
   3   0   6   -0.06    0.08
   3   0  -6    0.46    0.18
   3   0  -7    0.06    0.22
  -3   0   7   -0.03    0.10
  -3   0  -7   -0.10    0.19
   3   0   7   -0.06    0.12
  -3   0  -8   -0.01    0.28
   3   0   8   -0.08    0.13
  -3   0   8   -0.01    0.15
   3   0  -8    0.00    0.22
  -3   0   9   -0.10    0.16
   3   0  -9   -0.18    0.28
  -3   0  -9   -0.12    0.32
   3   0   9   -0.08    0.17
  -3   0  10    0.13    0.21
   3   0  10    0.32    0.17
   3   0 -10    0.52    0.30
  -3   0 -10   -0.18    0.39
  -3   0 -11    0.12    0.26
  -3   0  11   -0.05    0.19
   3   0 -11    0.18    0.27
   3   0  11    0.01    0.15
   3   0 -12    0.03    0.29
   3   0  12   -0.19    0.39
  -3   0  12   -0.03    0.21
   3   0 -13    0.83    0.44
  -3   0  13    0.25    0.31
   3   0  13    0.84    0.25
   3   0  13    0.15    0.57
   3   0 -14    0.46    0.39
  -3   0  14    0.55    0.33
   3   0  14    0.51    0.29
   3   0  14   -0.30    0.57
   3   0  15    0.34    0.58
   3   0 -15    0.01    0.42
  -3   0  15    0.56    0.35
  -3   0  16    0.74    0.44
   3   0 -16    1.52    0.53
   3   0  16    0.74    0.76
   3   0  17   -0.43    0.70
  -3   0  17    0.32    0.51
   3   0 -17    1.19    0.47
   3   0  18   -0.45    0.74
   4   0   0   14.98    0.57
   4   0   1   75.22    1.68
   4   0  -1   77.66    1.88
  -4   0  -1   77.51    1.66
  -4   0   1   74.10    1.20
  -4   0   2   28.48    0.48
   4   0   2   27.77    0.80
   4   0  -2   24.42    0.41
   4   0  -2   27.10    0.93
  -4   0  -2   27.24    0.88
   4   0  -3  318.63    2.86
  -4   0   3  314.66    2.68
  -4   0  -3  316.81    6.29
   4   0   3  319.86    5.17
   4   0  -3  339.67    6.97
   4   0   4    5.56    0.29
  -4   0   4    5.67    0.15
  -4   0  -4    5.56    0.46
   4   0  -4    5.42    0.47
   4   0  -5   34.46    1.36
   4   0   5   34.78    0.94
  -4   0  -5   36.89    1.51
  -4   0   5   35.44    0.64
   4   0  -6   43.36    1.74
   4   0   6   42.53    1.14
  -4   0   6   41.17    0.86
  -4   0  -6   44.99    1.78
   4   0   7   14.67    0.57
   4   0  -7   14.38    0.94
  -4   0  -7   14.22    0.92
  -4   0   7   14.87    0.52
  -4   0   8    1.25    0.18
   4   0  -8    0.76    0.43
  -4   0  -8    1.41    0.40
   4   0   8    1.54    0.25
   4   0  -9    7.36    0.77
   4   0   9    7.07    0.42
  -4   0  -9    7.79    0.87
  -4   0   9    6.45    0.44
   4   0 -10   31.62    1.63
  -4   0 -10   30.34    1.84
  -4   0  10   31.94    1.21
   4   0  10   30.69    1.09
   4   0 -11    2.49    0.57
  -4   0  11    2.02    0.32
  -4   0 -11    1.68    0.64
   4   0  11    2.34    0.30
   4   0  12    0.90    0.23
   4   0 -12    0.73    0.48
  -4   0  12    0.60    0.27
   4   0  13    3.90    0.86
  -4   0  13    2.96    0.45
   4   0 -13    2.76    0.61
   4   0  13    3.02    0.39
   4   0  14    1.19    0.32
  -4   0  14    1.28    0.38
   4   0 -14    0.92    0.58
   4   0  14    2.05    0.75
   4   0  15    2.84    0.79
  -4   0  15    0.97    0.47
   4   0 -15    1.10    0.65
  -4   0  16    0.75    0.43
   4   0 -16    0.67    0.60
   4   0  17    0.43    0.76
   4   0 -17    0.84    0.65
   4   0  18    0.11    0.65
   4   0  19    0.27    0.80
  -5   0   0    0.33    0.12
   5   0   0   -0.04    0.16
   5   0   1    0.09    0.14
   5   0  -1    0.07    0.14
  -5   0   1   -0.02    0.09
  -5   0  -1    0.47    0.13
   5   0   2    0.02    0.14
  -5   0  -2   -0.03    0.14
  -5   0   2    0.10    0.06
   5   0  -2    0.02    0.17
  -5   0  -3   -0.03    0.18
   5   0   3    0.03    0.12
   5   0  -3    0.14    0.19
  -5   0   3    0.07    0.05
   5   0   4    0.12    0.14
   5   0  -4    0.20    0.25
  -5   0  -4    0.01    0.21
  -5   0   4    0.09    0.04
  -5   0  -5    0.11    0.23
   5   0   5   -0.03    0.13
  -5   0   5    0.01    0.04
   5   0  -5    0.11    0.22
  -5   0   6    0.00    0.06
  -5   0  -6   -0.01    0.26
   5   0   6    0.02    0.12
   5   0  -6    0.18    0.19
  -5   0  -7    0.16    0.32
   5   0  -7   -0.11    0.23
  -5   0   7    0.06    0.08
   5   0   7    0.34    0.14
   5   0  -8    0.03    0.29
  -5   0   8    0.10    0.10
   5   0   8    0.01    0.13
  -5   0  -8   -0.06    0.30
  -5   0  -9    0.68    0.34
  -5   0   9   -0.05    0.11
   5   0   9    0.13    0.15
   5   0  -9    0.12    0.30
  -5   0 -10   -0.01    0.26
   5   0  10   -0.05    0.16
  -5   0  10    0.03    0.12
   5   0 -10    0.09    0.28
  -5   0 -11   -0.31    0.42
   5   0 -11   -0.08    0.37
   5   0  11    0.32    0.17
   5   0  12    0.40    0.22
   5   0 -12    0.06    0.40
  -5   0  12    0.81    0.25
   5   0 -13   -0.16    0.53
   5   0  13    1.12    0.56
   5   0  13    0.93    0.30
  -5   0  13    0.74    0.27
   5   0  14    1.07    0.60
   5   0 -14   -0.27    0.47
   5   0  15    0.20    0.66
   5   0 -15    0.65    0.53
   5   0 -16    0.21    0.42
   5   0  16   -0.24    0.52
   5   0 -17   -0.39    0.55
   5   0  17   -0.02    0.68
   5   0  18    0.43    0.66
   5   0  19    0.06    0.66
   6   0   0    3.89    0.41
  -6   0   0    4.26    0.28
  -6   0   1   18.07    0.59
   6   0   1   16.17    0.76
  -6   0  -1   16.59    0.72
   6   0  -1   16.43    0.84
  -6   0  -2   17.25    0.81
   6   0  -2   16.24    0.90
   6   0   2   16.15    0.75
  -6   0   2   17.21    0.50
  -6   0   3    7.09    0.24
  -6   0  -3    7.13    0.57
   6   0  -3    6.82    0.62
   6   0   3    7.41    0.50
  -6   0  -4    2.71    0.49
  -6   0   4    2.52    0.11
   6   0  -4    2.98    0.52
   6   0   4    3.09    0.35
  -6   0   5    0.90    0.06
   6   0   5    1.08    0.26
  -6   0  -5    1.34    0.42
   6   0  -5    1.22    0.34
  -6   0   6    6.90    0.18
  -6   0  -6    8.83    0.82
   6   0  -6    8.24    0.76
   6   0   6    7.70    0.46
   6   0   7    7.47    0.47
  -6   0   7    6.85    0.22
  -6   0  -7    8.14    0.82
   6   0  -7    7.25    0.75
   6   0  -8    3.23    0.64
   6   0   8    3.59    0.34
  -6   0  -8    3.22    0.65
  -6   0   8    3.22    0.19
   6   0   9   15.94    0.73
   6   0  -9   15.83    1.21
  -6   0   9   13.55    0.46
  -6   0  -9   14.79    1.16
  -6   0 -10    5.04    0.78
   6   0  10    4.17    0.38
  -6   0  10    3.81    0.28
   6   0 -10    4.19    0.76
  -6   0 -11    3.33    0.79
   6   0 -11    3.61    0.74
   6   0  11    3.23    0.36
   6   0 -12    1.92    0.68
   6   0  12    2.06    0.34
  -6   0 -12    2.54    0.60
   6   0 -13    5.32    0.90
   6   0  13    7.00    1.15
   6   0  13    4.98    0.55
   6   0  14    1.35    0.68
   6   0 -14   -0.04    0.57
   6   0  15    1.62    0.70
   6   0 -15    0.99    0.74
   6   0 -16    1.20    0.77
   6   0  16    1.70    0.90
   6   0 -17    1.10    0.77
   6   0  18    1.60    1.02
  -7   0   0   -0.01    0.11
   7   0   0    0.10    0.20
   7   0  -1    0.02    0.24
  -7   0  -1   -0.06    0.17
  -7   0   1    0.21    0.11
   7   0   1   -0.10    0.21
   7   0   2    0.03    0.20
   7   0  -2    0.77    0.25
  -7   0   2    0.05    0.10
  -7   0  -2    0.02    0.18
  -7   0   3    0.28    0.09
  -7   0  -3   -0.04    0.28
   7   0   3    0.52    0.24
   7   0  -3    0.88    0.31
   7   0   4    0.16    0.23
  -7   0  -4    0.61    0.31
   7   0  -4    0.73    0.32
  -7   0   4    0.14    0.06
   7   0   5   -0.09    0.18
  -7   0  -5    0.04    0.30
   7   0  -5    0.63    0.32
   7   0  -6    0.11    0.28
  -7   0  -6    0.00    0.29
   7   0   6   -0.06    0.15
  -7   0  -7    0.21    0.31
   7   0   7    0.26    0.20
  -7   0  -7    0.53    0.37
   7   0  -7   -0.02    0.29
   7   0  -8    0.18    0.44
  -7   0  -8    0.31    0.44
   7   0   8    0.53    0.21
  -7   0  -9    0.72    0.50
   7   0  -9    0.87    0.51
   7   0  10   -0.01    0.19
  -7   0 -10    0.73    0.41
   7   0  11    0.87    0.26
   7   0 -11   -0.10    0.55
  -7   0 -11    1.21    0.58
  -7   0 -12    0.27    0.36
   7   0  12   -0.12    0.19
   7   0 -12   -0.12    0.44
   7   0  13   -0.05    0.57
   7   0 -13    0.35    0.48
   7   0  14    0.16    0.41
   7   0 -14   -0.13    0.43
   7   0  15    0.40    0.58
   7   0 -15   -0.14    0.52
   7   0  16    0.35    0.76
   7   0 -16    0.56    0.68
   7   0  17    0.92    0.78
   7   0 -17    0.01    0.72
   7   0  18    0.05    0.70
   8   0   0    0.00    0.29
  -8   0   0    0.33    0.16
  -8   0  -1    4.16    0.42
  -8   0   1    3.50    0.32
   8   0  -1    3.32    0.55
   8   0   1    3.90    0.49
  -8   0   2    7.83    0.40
  -8   0  -2    8.41    0.60
   8   0  -2    7.86    0.77
   8   0   2    8.37    0.66
  -8   0   3    2.55    0.19
   8   0   3    2.59    0.44
  -8   0  -3    2.99    0.46
   8   0  -3    3.27    0.52
   8   0  -4    3.33    0.48
  -8   0   4    2.04    0.14
  -8   0  -4    3.08    0.55
   8   0   4    2.48    0.41
   8   0  -5    8.86    0.97
  -8   0  -5    9.52    0.98
   8   0   5    9.57    0.70
  -8   0  -6    2.08    0.58
   8   0  -6    1.89    0.54
   8   0   6    1.55    0.34
  -8   0  -7    2.07    0.61
   8   0  -7    2.05    0.59
   8   0   7    1.99    0.39
   8   0  -8    2.33    0.61
  -8   0  -8    2.94    0.67
   8   0   8    2.09    0.36
   8   0   9    3.34    0.44
  -8   0  -9    4.55    0.81
   8   0  -9    5.17    0.81
  -8   0 -10    1.55    0.63
   8   0  10    1.13    0.33
   8   0 -10    2.13    0.65
  -8   0 -11    0.02    0.45
   8   0  11    0.03    0.20
   8   0 -11    0.19    0.42
   8   0 -12    3.37    1.01
  -8   0 -12    4.10    0.83
   8   0  12    4.20    0.47
   8   0  13   -0.29    0.63
   8   0 -13   -0.22    0.56
   8   0 -14    1.42    0.68
   8   0  14    0.22    0.65
   8   0  15    0.59    0.92
   8   0 -15    1.91    0.83
   8   0  16   -0.56    0.55
   8   0 -16    0.51    0.52
   8   0  17    0.41    0.57
   8   0 -17   -0.33    0.65
   9   0   0   -0.01    0.26
  -9   0   0   -0.02    0.16
   9   0  -1    0.09    0.26
  -9   0   1   -0.03    0.13
   9   0   1    0.07    0.24
   9   0   2    0.05    0.24
  -9   0   2    0.04    0.14
   9   0  -2   -0.01    0.29
  -9   0  -2    0.03    0.24
   9   0  -3   -0.18    0.37
   9   0   3   -0.16    0.29
  -9   0   3    0.40    0.14
   9   0   4    0.47    0.27
  -9   0  -4    0.20    0.39
   9   0  -4    0.42    0.44
  -9   0  -5    0.21    0.35
   9   0   5    0.13    0.28
   9   0  -5    0.28    0.41
   9   0  -6    0.48    0.41
   9   0   6    0.06    0.28
   9   0   7    0.12    0.25
   9   0  -7   -0.08    0.40
  -9   0  -7    0.63    0.42
   9   0   8    0.07    0.17
  -9   0  -8   -0.24    0.31
   9   0   9   -0.16    0.24
   9   0  -9    0.03    0.46
  -9   0  -9    1.54    0.46
   9   0  10    0.19    0.29
   9   0 -11   -0.23    0.54
   9   0  11    0.06    0.30
  -9   0 -11    0.98    0.52
  -9   0 -12   -0.29    0.48
   9   0  13    0.59    0.72
   9   0 -13    0.38    0.68
   9   0 -14    0.00    0.59
   9   0  14   -0.35    0.64
   9   0 -15    0.65    0.73
   9   0  15    0.17    0.83
   9   0 -16    1.70    1.00
   9   0  16    1.55    1.05
   9   0 -17    0.03    0.72
   9   0  17    0.28    0.77
 -10   0   0    1.68    0.32
  10   0   0    1.49    0.54
  10   0   1    2.85    0.66
 -10   0  -1    4.24    0.51
  10   0  -1    3.96    0.70
 -10   0   1    3.83    0.39
 -10   0   2    1.12    0.26
 -10   0  -2    1.34    0.40
  10   0  -2    1.14    0.53
  10   0   2    0.76    0.48
  10   0   3    6.44    0.75
 -10   0   3    5.98    0.38
 -10   0  -3    7.37    0.82
  10   0  -3    6.74    0.76
  10   0  -4    2.46    0.60
  10   0   4    0.88    0.39
 -10   0  -4    0.91    0.52
  10   0   5    0.16    0.33
  10   0  -5    0.93    0.53
 -10   0  -5    0.83    0.49
  10   0  -6    0.87    0.63
  10   0   6    1.48    0.40
 -10   0  -6    1.43    0.65
  10   0  -7    2.25    0.62
  10   0   7    2.14    0.47
 -10   0  -7    3.22    0.79
  10   0   8    1.59    0.41
  10   0  -8    2.51    0.70
 -10   0  -8    2.38    0.76
 -10   0  -9    1.05    0.68
  10   0   9    1.15    0.43
  10   0  -9    1.36    0.70
  10   0  10    0.51    0.37
  10   0 -10    1.35    0.69
 -10   0 -10    1.84    0.69
 -10   0 -11    0.91    0.62
  10   0  11    0.18    0.38
  10   0 -11    0.50    0.62
  10   0 -12    1.06    0.75
  10   0  13    1.64    0.98
  10   0 -13    1.74    0.92
  10   0 -14    1.52    0.81
  10   0  14   -0.08    0.88
  10   0  15    1.04    0.91
  10   0 -15    0.71    0.82
  10   0  16    0.76    0.74
  10   0 -16   -0.46    0.70
 -11   0   0    0.39    0.28
  11   0   0    0.37    0.46
 -11   0  -1   -0.16    0.25
 -11   0   1    0.28    0.23
 -11   0  -2    0.12    0.32
  11   0   2    0.35    0.36
  11   0  -2    0.22    0.45
  11   0  -3   -0.32    0.47
  11   0   3    0.76    0.41
 -11   0  -3    0.27    0.38
  11   0   4    0.79    0.35
 -11   0  -4   -0.13    0.42
  11   0  -4   -0.20    0.51
  11   0  -5   -0.15    0.43
 -11   0  -5    0.70    0.41
  11   0   6    0.67    0.43
  11   0  -6    0.25    0.55
 -11   0  -6    0.66    0.56
  11   0   7   -0.21    0.30
  11   0  -7    0.92    0.47
 -11   0  -8   -0.30    0.61
  11   0   8    1.24    0.43
 -11   0  -9    1.30    0.73
 -11   0 -10   -0.47    0.64
  11   0 -11    0.57    0.76
 -11   0 -11    0.97    0.60
  11   0  12    1.28    0.73
  11   0 -12   -0.41    0.67
  11   0  13    0.26    0.68
  11   0 -13   -0.41    0.61
  11   0  14    0.74    0.92
  11   0  15    0.42    0.85
  11   0 -15    0.28    0.73
  12   0   0    0.41    0.53
 -12   0   0    0.49    0.31
 -12   0  -1    3.84    0.63
 -12   0   1    3.10    0.43
  12   0  -1    3.21    0.83
  12   0   1    3.47    0.81
  12   0   2    0.82    0.51
  12   0  -2    0.89    0.55
 -12   0  -2   -0.24    0.43
 -12   0  -3    5.11    0.89
  12   0  -3    4.95    1.09
  12   0   3    5.34    0.93
  12   0   4    1.14    0.56
  12   0  -4    0.35    0.69
 -12   0  -4    1.21    0.60
 -12   0  -5    1.05    0.67
  12   0  -5    1.47    0.71
  12   0   5    0.63    0.50
  12   0  -6    1.72    0.71
 -12   0  -6    2.80    0.81
  12   0   6    2.76    0.64
  12   0  -7    1.15    0.76
 -12   0  -7    1.32    0.75
  12   0   7    1.54    0.55
  12   0  -8    1.02    0.69
 -12   0  -8    1.26    0.73
  12   0   8    0.43    0.46
  12   0   9    1.91    0.52
 -12   0  -9    2.09    0.82
  12   0  -9    1.54    0.89
  12   0 -10    2.38    0.96
 -12   0 -10    1.00    0.78
  12   0  10    2.75    0.63
  12   0  11    0.42    0.77
  12   0 -12    1.17    0.72
  12   0  12    0.86    0.94
  12   0  13    0.41    0.92
  12   0 -13    1.16    0.88
  12   0 -14    0.47    0.78
  12   0  14    0.01    0.81
 -13   0   0    0.60    0.31
  13   0   0    0.01    0.59
  13   0  -1    0.28    0.51
  13   0   1   -0.02    0.62
 -13   0  -1    1.17    0.37
 -13   0  -2    0.89    0.45
  13   0  -2    0.44    0.66
  13   0   2    1.23    0.62
 -13   0  -3    0.40    0.46
  13   0  -3    0.57    0.54
  13   0   3    0.56    0.57
 -13   0  -4   -0.10    0.55
  13   0   4    1.28    0.55
  13   0  -4    0.37    0.68
 -13   0  -5    1.18    0.59
  13   0  -5   -0.44    0.65
  13   0   6    0.33    0.59
  13   0  -6    2.10    0.78
 -13   0  -7    0.90    0.76
  13   0  -7    3.29    0.92
 -13   0  -8    0.70    0.83
  13   0  -8    1.22    0.77
  13   0   8    1.32    0.60
  13   0   9    0.95    0.52
  13   0  10    1.96    1.04
  13   0 -11    2.36    1.08
  13   0 -12   -0.24    0.64
  13   0  12    0.36    0.67
  13   0  13    1.45    0.94
  13   0 -13   -0.34    0.91
  14   0   0    1.20    0.74
  14   0  -1    1.31    0.74
  14   0   1    0.86    0.73
  14   0  -2    1.39    0.79
  14   0   2    0.06    0.68
 -14   0  -2    1.37    0.55
  14   0   3   -0.25    0.53
 -14   0  -3    1.08    0.51
  14   0  -3    0.32    0.73
  14   0  -4    0.45    0.73
  14   0   4    1.17    0.67
  14   0  -5   -0.44    0.70
  14   0   5    1.05    0.60
 -14   0  -6    0.15    0.62
  14   0   6    1.51    0.68
  14   0  -6    1.26    0.80
  14   0  -7    1.14    0.82
 -14   0  -7    1.28    0.66
  14   0   7    0.28    0.69
  14   0  -8    0.36    0.64
  14   0   8    0.01    0.54
  14   0  -9    1.18    0.76
  14   0   9    0.80    1.05
  14   0  10    0.52    0.88
  14   0  11    0.52    0.93
  15   0   0    1.00    0.78
  15   0  -1    0.24    0.70
  15   0  -2    1.32    0.90
  15   0   2    1.22    0.79
  15   0   4    0.35    0.60
  15   0  -4    0.04    0.67
  15   0  -5    0.52    0.89
  15   0   5    1.54    0.88
  15   0   5    1.50    0.68
  15   0  -6    2.08    0.82
  15   0   6    0.44    0.62
  15   0   6   -0.35    0.85
  15   0  -7    1.20    0.87
  15   0   7   -0.32    0.75
  15   0   7    2.52    0.97
  15   0  -8    0.82    0.79
  15   0   8    0.04    0.93
  15   0   9   -0.33    0.85
  15   0  -9   -0.02    0.74
  15   0  10    0.28    1.09
  15   0 -10    1.97    1.07
  16   0   0   -0.49    0.82
  16   0  -1    0.48    0.79
  16   0   1    0.30    0.71
  16   0  -2   -0.11    0.70
  16   0   3    2.28    0.99
  16   0  -4   -0.02    0.60
  16   0  -5    2.67    0.98
  16   0   5   -0.23    0.84
  17   0   0    0.25    0.84
  17   0  -1    0.08    1.08
  17   0   1    2.23    1.03
  17   0   2    1.04    1.02
  17   0  -2    1.50    1.03
  17   0   3    1.83    1.02
  17   0  -3    2.21    1.17
   0  -1   2   -0.01    0.07
   0   1  -2    0.15    0.06
   0   1   2    0.08    0.07
   0  -1  -2    0.03    0.02
   0  -1   2    0.12    0.05
   0  -1  -2    0.05    0.07
   0   1  -2    0.08    0.07
   0   1   2    0.07    0.03
   0   1  -3  106.70    1.93
   0   1   3  102.94    1.93
   0  -1  -3  104.00    1.26
   0   1   3  101.39    1.22
   0   1  -3  103.54    1.80
   0   1   4    0.06    0.05
   0  -1  -4    0.02    0.05
   0   1  -4    0.05    0.10
   0   1  -4    0.00    0.10
   0   1   4    0.09    0.12
   0   1  -5    1.09    0.17
   0   1  -5    1.13    0.19
   0  -1  -5    1.19    0.13
   0   1   5    1.16    0.21
   0   1   6    0.08    0.15
   0   1  -6   -0.03    0.14
   0  -1  -6   -0.01    0.10
   0   1  -6    0.29    0.14
   0   1  -7    5.04    0.44
   0   1  -7    4.01    0.41
   0   1   7    4.57    0.40
   0  -1  -7    4.47    0.27
   0   1   8    0.70    0.28
   0   1  -8    0.09    0.24
   0  -1  -8    0.37    0.18
   0   1  -8    0.71    0.28
   0   1  -9    2.83    0.39
   0   1   9    2.58    0.47
   0  -1  -9    3.14    0.31
   0   1  -9    2.92    0.48
   0  -1 -10    0.03    0.14
   0   1 -10   -0.09    0.22
   0   1  10    0.01    0.26
   0   1 -10    0.16    0.22
   0  -1 -11    2.65    0.34
   0   1 -11    3.24    0.49
   0   1  11    3.40    0.56
   0   1 -11    2.61    0.54
   0   1  12   -0.05    0.33
   0  -1 -12   -0.08    0.17
   0   1 -12   -0.03    0.23
   0  -1  12    0.01    0.33
   0  -1  13    5.02    0.80
   0   1  13    4.41    0.77
   0   1 -13    3.88    0.57
   0  -1 -13    3.93    0.47
   0   1  14   -0.08    0.34
   0   1 -14    0.12    0.24
   0  -1 -14   -0.07    0.18
   0  -1  15    3.28    0.84
   0   1 -15    4.11    0.64
   0  -1 -15    3.24    0.50
   0   1  15    3.43    0.78
   0   1  16    0.37    0.50
   0   1 -16   -0.27    0.35
   0  -1  16    0.76    0.49
   0   1  17   -0.02    0.63
   0   1 -17    0.31    0.42
   0  -1  17    1.21    0.60
   0   1  18    1.11    0.68
   0  -1  18    0.03    0.68
   0   1  19    0.31    0.71
   0  -1  19    0.34    0.73
   1   1  -2  391.70    5.39
   1  -1   2  393.34    4.70
  -1   1   2  390.39    4.42
  -1   1   2  379.70    4.16
   1   1  -2  386.10    3.52
   1   1   2  389.68    5.24
   1  -1  -2  381.18    4.62
  -1   1  -2  404.81    5.12
  -1  -1   2  388.17    3.46
   1   1  -3  483.93    7.18
   1   1  -3  479.37    5.31
  -1   1   3  474.88    5.98
   1   1   3  479.48    7.20
   1   1   3  473.23    3.06
  -1   1  -3  478.99    6.73
  -1  -1   3  474.24    5.12
  -1   1   4  215.57    3.62
  -1  -1  -4  216.76    2.20
   1   1  -4  217.99    4.10
   1   1   4  210.31    2.28
  -1   1  -4  218.05    3.64
   1   1   4  215.80    4.17
  -1   1  -4  217.64    4.12
   1   1  -5    5.11    0.26
   1   1  -5    7.23    0.42
  -1  -1  -5    6.67    0.20
  -1   1   5    7.29    0.37
  -1   1  -5    6.73    0.35
   1   1   5    6.46    0.44
  -1   1  -5    7.21    0.42
   1   1  -6    4.20    0.28
   1   1  -6    3.62    0.36
  -1  -1  -6    3.68    0.19
  -1   1   6    3.49    0.30
  -1   1  -6    3.43    0.29
   1   1   6    2.99    0.37
  -1   1  -6    3.69    0.36
   1   1  -7    1.54    0.24
   1   1  -7    1.42    0.32
  -1  -1  -7    1.73    0.18
  -1   1   7    1.64    0.27
  -1   1  -7    1.54    0.33
  -1   1  -7    1.50    0.25
   1   1   7    1.78    0.34
  -1  -1  -8   69.16    1.63
   1   1  -8   68.59    2.25
  -1   1   8   69.34    2.25
   1   1  -8   68.60    2.10
  -1   1  -8   71.09    2.52
   1   1   8   66.87    2.40
  -1   1  -8   71.49    2.12
   1   1  -9   23.48    1.08
  -1  -1  -9   23.51    0.84
   1   1  -9   25.39    1.22
  -1   1   9   23.20    1.20
  -1   1  -9   25.30    1.13
   1   1   9   21.86    1.30
  -1   1  -9   24.20    1.33
   1   1 -10   32.28    1.58
  -1   1  10   29.88    1.50
   1   1 -10   28.78    1.29
  -1  -1 -10   29.45    1.02
   1   1  10   28.73    1.56
  -1   1 -10   30.00    1.31
  -1   1 -10   29.99    1.62
  -1  -1 -11    1.42    0.27
   1   1 -11    1.13    0.39
  -1   1  11    1.31    0.42
   1  -1 -11    0.22    0.25
  -1   1 -11    1.02    0.33
   1   1  11    0.97    0.47
  -1  -1  11    1.20    0.42
  -1   1 -11    0.75    0.46
  -1  -1 -12    9.01    0.61
  -1   1  12    8.05    0.78
   1   1 -12    7.70    0.80
  -1   1 -12    8.90    0.76
   1  -1 -12    6.35    0.60
  -1  -1  12    8.77    0.86
   1   1  12    8.42    0.93
  -1   1 -12    8.48    0.92
   1   1 -13    2.56    0.55
  -1  -1 -13    3.23    0.45
  -1   1  13    3.15    0.59
   1  -1  13    3.81    0.76
  -1  -1  13    2.91    0.57
   1   1  13    4.00    0.70
   1  -1 -13    3.06    0.43
  -1   1 -13    2.95    0.51
  -1   1  14    4.74    0.72
  -1  -1 -14    4.67    0.47
   1  -1  14    4.95    0.95
   1   1 -14    4.82    0.67
   1   1  14    4.41    0.79
   1  -1 -14    4.01    0.55
  -1   1 -14    4.30    0.60
  -1  -1  14    4.67    0.72
   1  -1  15    0.98    0.68
   1   1 -15    0.95    0.53
  -1   1  15    1.41    0.53
   1  -1 -15    0.79    0.40
  -1   1 -15    1.38    0.49
  -1  -1  15    1.46    0.52
   1   1  15    1.93    0.70
   1  -1  16    0.87    0.60
  -1   1  16    1.28    0.59
   1   1 -16    0.55    0.45
  -1  -1  16    1.19    0.52
   1   1  16   -0.13    0.68
   1  -1  17    1.06    0.67
   1   1 -17    0.59    0.46
  -1  -1  17   -0.38    0.61
   1   1  17    1.52    0.70
  -1   1  18    0.91    0.64
  -1  -1  18    2.37    0.75
   1   1  18   -0.20    0.82
   1  -1  19   -0.54    0.81
  -1   1  19    1.18    0.72
   1   1  19    1.21    0.80
   1   1  20    1.02    0.84
   2  -1   0   25.26    0.53
  -2  -1   0   25.27    0.57
  -2  -1   0   26.63    0.49
   2  -1   0   27.64    0.62
  -2   1   0   27.95    0.55
   2   1   0   26.98    0.58
   2   1  -1   19.11    0.26
   2  -1   1   19.26    0.48
  -2  -1  -1   17.54    0.36
  -2   1   1   18.36    0.38
   2   1  -1   19.80    0.55
  -2   1  -1   19.61    0.51
   2   1   1   19.22    0.39
  -2  -1   1   19.30    0.28
   2   1   1   18.98    0.49
   2  -1  -1   18.51    0.40
   2  -1  -1   18.81    0.48
  -2  -1  -2   32.34    0.49
   2   1  -2   33.39    0.87
   2   1  -2   33.34    0.34
  -2   1   2   33.22    0.62
   2  -1   2   32.67    0.75
   2  -1  -2   33.41    0.62
   2   1   2   32.27    0.84
   2   1   2   31.86    0.49
  -2   1  -2   31.82    0.80
   2  -1  -2   31.41    0.75
  -2  -1   2   32.30    0.33
  -2   1   3  163.95    2.38
   2  -1   3  165.20    2.75
   2   1  -3  167.63    3.35
  -2  -1  -3  165.26    1.69
   2   1  -3  165.87    1.76
   2  -1  -3  165.81    2.89
   2   1   3  163.53    1.66
  -2  -1   3  166.30    1.71
  -2   1  -3  163.85    3.24
   2   1   3  171.30    3.41
   2  -1   4  132.73    2.51
   2   1  -4  131.83    3.02
   2   1  -4  135.62    1.96
  -2   1   4  138.80    2.38
   2  -1  -4  145.53    2.91
   2   1   4  131.88    1.64
   2   1   4  136.66    3.18
  -2   1  -4  134.17    3.05
   2   1   4  134.10    1.52
   2   1  -5   73.70    2.06
  -2   1   5   70.53    1.53
   2  -1   5   68.72    1.60
   2   1  -5   71.83    1.40
   2   1   5   73.12    2.13
   2  -1  -5   72.11    1.79
  -2   1  -5   69.76    1.99
   2   1   5   70.89    1.05
  -2   1   6   13.36    0.54
   2   1  -6   13.05    0.70
   2   1  -6   12.67    0.46
   2  -1   6   12.41    0.54
   2   1   6   13.48    0.36
   2  -1  -6   13.66    0.62
  -2   1  -6   13.57    0.72
   2   1   6   13.42    0.78
   2   1  -7    2.98    0.24
  -2   1   7    4.08    0.35
   2   1  -7    4.01    0.45
   2  -1   7    3.70    0.29
   2  -1  -7    4.36    0.38
   2   1   7    4.37    0.52
   2   1   7    3.94    0.21
  -2   1  -7    4.55    0.48
   2   1  -8    4.19    0.55
   2  -1   8    4.88    0.36
  -2   1   8    4.99    0.41
   2   1   8    4.99    0.27
  -2   1  -8    4.92    0.63
   2   1   8    4.39    0.61
   2  -1  -8    4.33    0.42
   2  -1   9    1.51    0.30
  -2   1   9    1.79    0.31
   2   1  -9    1.92    0.42
   2   1   9    1.22    0.46
   2   1   9    0.98    0.19
  -2  -1   9    1.78    0.28
  -2   1  -9    1.00    0.50
   2  -1  -9    1.20    0.35
   2  -1  10    2.77    0.37
   2   1 -10    3.15    0.50
  -2   1  10    3.23    0.43
  -2  -1  10    4.74    0.42
   2  -1 -10    3.17    0.41
   2   1  10    2.63    0.27
   2   1  10    2.43    0.60
  -2   1 -10    2.92    0.62
  -2   1  11    1.64    0.40
   2   1 -11    1.78    0.50
   2  -1  11    2.47    0.37
  -2   1 -11    1.89    0.59
   2  -1 -11    1.85    0.42
   2   1  11    1.86    0.57
   2   1  11    1.25    0.25
  -2  -1  11    1.75    0.37
   2   1 -12    7.51    0.89
  -2   1  12    7.56    0.76
   2  -1  12    7.28    0.59
  -2   1 -12    7.37    0.92
   2  -1 -12    7.70    0.72
  -2  -1  12    7.38    0.69
   2   1  12    7.44    0.50
   2   1  12    7.64    0.95
  -2   1  13    0.42    0.37
   2  -1  13    1.05    0.30
   2   1 -13    1.34    0.50
   2   1  13    0.89    0.54
   2  -1 -13    0.69    0.35
  -2   1 -13    0.56    0.54
   2   1  13    0.74    0.25
  -2  -1  13    0.56    0.35
   2   1 -14    0.37    0.38
   2  -1  14    0.60    0.29
   2  -1  14    0.32    0.56
   2  -1 -14    0.17    0.38
  -2  -1  14    0.00    0.35
   2   1  14    1.41    0.54
  -2   1  15    0.19    0.38
   2  -1  15    0.33    0.53
   2  -1  15    0.12    0.34
   2  -1 -15    0.66    0.36
   2   1  15    0.23    0.58
  -2  -1  15    0.61    0.38
   2   1 -16    0.36    0.43
   2  -1  16    0.24    0.27
  -2   1  16    0.05    0.37
   2  -1  16    0.12    0.54
   2  -1 -16    0.06    0.30
   2   1  16   -0.37    0.54
   2   1 -17   -0.28    0.42
   2  -1  17    0.08    0.60
  -2  -1  17   -0.08    0.48
   2   1  17   -0.44    0.62
   2  -1  18    0.39    0.89
  -2   1  18    1.39    0.71
   2   1  18   -0.28    0.92
  -2  -1  18    3.57    0.74
   2  -1  19    1.25    0.93
   2   1  19    1.22    0.92
   2   1  20    1.31    1.06
   3  -1   0 1319.60   16.33
   3   1   0 1316.90   15.64
  -3   1   0 1327.04   14.33
   3  -1   1  230.37    3.78
   3   1  -1  230.24    4.06
   3   1  -1  231.02    2.35
  -3   1   1  230.50    3.06
   3   1  -1  227.64    2.40
   3  -1  -1  223.84    3.86
   3   1   1  241.16    3.79
  -3   1  -1  230.35    3.75
   3   1   1  231.64    3.44
  -3  -1  -2  180.87    3.45
   3   1  -2  198.44    1.03
   3  -1   2  205.10    3.42
  -3   1   2  203.58    2.62
   3   1  -2  200.05    3.85
   3   1   2  203.62    2.81
  -3   1  -2  199.52    3.61
   3  -1  -2  200.81    3.65
   3   1  -3   91.50    2.26
  -3   1   3   88.30    1.41
   3  -1   3   90.12    1.86
  -3  -1  -3   85.68    2.08
   3   1   3   92.62    1.46
   3  -1  -3   88.64    2.04
  -3   1  -3   87.61    2.12
   3   1  -4   13.51    0.67
  -3  -1  -4   12.96    0.60
   3  -1   4   12.86    0.50
  -3   1   4   14.17    0.40
  -3   1  -4   14.21    0.68
  -3  -1   4   13.08    0.25
  -3  -1   4   12.82    0.24
   3  -1  -4   12.72    0.58
   3   1   4   13.48    0.34
  -3  -1  -5    0.52    0.23
  -3   1   5    1.47    0.13
   3   1  -5    0.90    0.28
   3  -1   5    0.70    0.16
   3   1   5    0.82    0.10
  -3  -1   5    0.82    0.09
   3  -1  -5    1.06    0.25
  -3   1  -5    0.93    0.23
   3  -1   6   23.93    0.81
   3   1  -6   24.31    1.13
  -3   1   6   24.28    0.76
  -3   1  -6   23.45    1.10
   3   1   6   23.85    0.57
   3   1   6   23.82    1.10
  -3  -1   6   22.55    0.61
   3  -1  -6   24.12    0.99
   3   1  -7    4.82    0.57
   3  -1   7    4.75    0.36
  -3   1   7    5.06    0.35
   3   1   7    4.27    0.55
  -3  -1   7    4.99    0.31
  -3   1  -7    4.44    0.57
   3   1   7    5.43    0.25
   3  -1  -7    5.13    0.50
   3   1  -8   44.01    1.89
   3  -1   8   46.73    1.46
  -3   1   8   43.24    1.36
   3   1   8   44.83    1.06
   3  -1  -8   44.04    1.73
  -3   1  -8   45.03    2.05
  -3  -1   8   42.28    1.29
   3   1   8   43.70    1.93
  -3   1   9    8.25    0.57
   3   1  -9    8.87    0.81
   3  -1   9    8.95    0.60
   3   1   9    8.92    0.41
  -3   1  -9    9.41    0.92
   3  -1  -9    8.48    0.66
   3   1   9    9.32    0.92
  -3  -1   9    9.19    0.55
  -3   1  10    5.42    0.52
   3   1 -10    4.91    0.62
   3  -1  10    5.62    0.47
   3   1  10    4.79    0.76
   3  -1 -10    4.76    0.60
  -3   1 -10    5.27    0.76
  -3  -1  10    4.32    0.40
   3   1  10    4.98    0.33
  -3   1  11    6.35    0.58
   3  -1  11    6.91    0.54
   3   1 -11    6.47    0.80
   3  -1 -11    6.39    0.70
   3   1  11    6.45    0.40
   3   1  11    5.62    0.88
  -3   1 -11    7.12    0.91
  -3  -1  11    5.81    0.50
  -3   1  12    1.65    0.38
   3  -1  12    1.35    0.34
   3   1 -12    1.68    0.54
   3  -1 -12    2.71    0.48
   3   1  12    1.59    0.27
  -3   1 -12    1.19    0.59
   3   1  12    1.11    0.62
  -3  -1  12    1.33    0.33
  -3   1  13    0.69    0.36
   3  -1  13    0.85    0.32
   3   1 -13    0.71    0.52
   3   1  13    1.29    0.61
  -3  -1  13    0.72    0.34
   3  -1 -13    0.62    0.40
  -3   1 -13    1.87    0.58
   3   1  13    0.97    0.22
   3   1 -14    3.88    0.78
  -3   1  14    4.41    0.62
   3  -1  14    3.89    0.53
  -3  -1  14    4.47    0.58
  -3   1 -14    4.50    0.77
   3  -1 -14    3.89    0.70
   3   1  14    3.93    0.79
   3  -1  15    0.36    0.34
   3   1 -15    0.90    0.56
   3  -1  15    1.11    0.65
   3  -1 -15    0.71    0.41
   3   1  15    0.15    0.64
  -3  -1  15    0.59    0.37
   3   1 -16    1.21    0.51
   3  -1  16    0.68    0.68
  -3  -1  16   -0.16    0.39
   3  -1 -16   -0.02    0.50
   3   1  16    1.13    0.63
   3   1 -17    0.13    0.42
   3  -1  17   -0.09    0.60
   3   1  17    0.41    0.63
   3  -1  18    1.62    0.76
   3   1 -18    1.00    0.71
   3   1  18    0.08    0.90
   3  -1  19    0.38    0.91
   3   1  19    1.11    0.92
   4  -1   0   33.34    1.00
   4   1   0   32.72    0.97
  -4   1   0   34.78    0.87
  -4  -1  -1    0.72    0.16
   4  -1   1    0.89    0.20
  -4   1   1    1.04    0.11
   4   1  -1    0.93    0.09
   4   1  -1    1.14    0.22
   4  -1  -1    0.67    0.20
  -4   1  -1    0.85    0.17
   4  -1   2    6.26    0.37
  -4  -1  -2    5.85    0.36
   4   1  -2    6.11    0.13
   4   1  -2    5.73    0.38
  -4   1   2    5.77    0.24
   4   1  -2    5.79    0.12
   4   1   2    5.94    0.27
   4  -1  -2    5.99    0.39
  -4   1  -2    5.80    0.36
   4  -1   3    5.93    0.36
  -4   1   3    5.79    0.22
   4   1  -3    5.68    0.44
  -4  -1  -3    6.48    0.43
  -4   1  -3    5.54    0.43
   4   1   3    5.74    0.26
   4  -1  -3    5.78    0.37
  -4  -1  -4   18.34    0.86
  -4   1   4   19.80    0.51
   4  -1   4   18.32    0.67
   4   1  -4   18.81    0.91
   4  -1  -4   17.82    0.80
  -4   1  -4   19.18    0.89
   4   1   4   18.61    0.53
   4   1  -5   78.68    2.58
  -4   1   5   77.70    1.50
   4  -1   5   79.71    1.96
  -4  -1  -5   80.03    2.54
   4  -1  -5   85.73    2.55
  -4   1  -5   76.49    2.46
   4   1   5   81.46    1.56
  -4  -1   5   77.84    0.88
  -4  -1  -6   15.75    1.00
  -4   1   6   17.70    0.58
   4  -1   6   16.55    0.70
   4   1  -6   16.89    1.01
  -4   1  -6   15.56    0.99
   4   1   6   16.62    0.52
   4  -1  -6   16.64    0.91
  -4  -1   6   16.37    0.40
   4  -1   7   10.11    0.58
  -4   1   7    9.71    0.44
   4   1  -7   10.37    0.85
  -4  -1  -7    9.87    0.74
  -4  -1   7    9.58    0.36
  -4   1  -7   10.30    0.85
   4   1   7   10.18    0.40
   4  -1  -7    9.51    0.68
   4   1  -8   41.48    1.96
  -4   1   8   39.46    1.18
   4  -1   8   42.23    1.40
   4   1   8   41.25    1.05
   4   1   8   43.16    2.12
  -4  -1   8   41.89    1.13
  -4   1  -8   44.26    2.10
   4  -1  -8   41.96    1.79
  -4   1   9    0.22    0.17
   4   1  -9    0.09    0.34
  -4  -1   9    0.08    0.17
   4   1   9    0.03    0.39
   4   1   9    0.31    0.13
  -4   1  -9    0.47    0.40
   4  -1  -9    0.18    0.31
   4  -1  10    2.51    0.35
  -4   1  10    2.85    0.34
   4   1 -10    3.01    0.59
   4   1  10    2.24    0.25
   4   1  10    2.52    0.55
   4  -1 -10    2.74    0.52
  -4  -1  10    2.20    0.31
  -4   1 -10    2.50    0.55
  -4   1  11    0.54    0.24
   4  -1  11    0.51    0.24
   4   1 -11    0.35    0.40
  -4  -1  11    0.66    0.20
   4   1  11    0.02    0.18
  -4   1 -11    0.54    0.48
   4  -1 -11    0.46    0.38
   4   1  11    0.34    0.48
   4  -1  12    0.62    0.29
  -4   1  12    0.98    0.31
   4   1 -12    1.15    0.44
  -4  -1  12    0.55    0.26
   4   1  12    1.56    0.59
  -4   1 -12    0.01    0.57
   4  -1 -12    1.06    0.46
   4   1  12    1.04    0.22
   4   1 -13    0.21    0.36
  -4   1  13   -0.18    0.23
   4  -1  13    0.09    0.21
   4   1  13    0.22    0.41
  -4   1 -13    0.34    0.40
   4  -1 -13   -0.04    0.29
   4  -1  14    0.92    0.34
  -4   1  14    0.93    0.42
   4   1 -14    0.76    0.57
  -4  -1  14    0.85    0.34
   4  -1 -14    1.37    0.51
   4   1  14    0.95    0.70
   4   1 -15    1.46    0.70
  -4   1  15    1.51    0.46
   4  -1  15    1.87    0.83
   4  -1  15    0.80    0.39
   4  -1 -15    1.58    0.58
   4   1  15    1.29    0.77
  -4  -1  15    1.45    0.39
   4  -1  16    0.01    0.65
   4   1 -16    0.63    0.49
   4   1  16   -0.20    0.61
   4   1 -17    0.93    0.66
   4  -1 -17    1.24    0.58
   4   1  17    0.35    0.81
   4  -1  18    0.93    0.85
   4   1 -18    0.74    0.68
   4   1  18    0.16    0.86
   4  -1  19    0.62    0.77
  -5  -1   0   41.18    1.00
   5   1   0   39.75    1.26
   5  -1   0   41.45    1.33
  -5   1   0   39.51    1.05
  -5   1   1    0.84    0.13
   5   1  -1    0.50    0.23
  -5  -1  -1    0.73    0.16
   5  -1   1    0.82    0.22
   5  -1  -1    1.27    0.23
  -5   1  -1    0.83    0.18
   5   1   1    0.97    0.20
   5   1  -2   36.17    0.60
   5  -1   2   36.94    1.20
   5   1  -2   37.08    1.34
  -5  -1  -2   36.83    1.19
  -5   1   2   35.69    0.83
  -5   1  -2   35.46    1.20
   5  -1  -2   34.33    1.24
   5   1   2   35.41    1.05
   5   1  -3   24.20    1.10
  -5   1   3   25.26    0.62
  -5  -1  -3   25.36    1.03
   5  -1   3   24.39    0.91
  -5   1  -3   24.34    1.02
   5   1   3   24.41    0.76
   5  -1  -3   24.32    0.99
   5  -1   4   15.10    0.70
  -5   1   4   14.40    0.41
   5   1  -4   15.08    0.87
  -5  -1  -4   14.50    0.83
   5   1   4   14.81    0.54
   5  -1  -4   14.20    0.82
  -5   1  -4   14.69    0.78
  -5   1   5    5.98    0.27
   5  -1   5    6.08    0.46
   5   1  -5    5.53    0.63
  -5  -1  -5    5.00    0.61
  -5   1  -5    5.60    0.60
   5   1   5    6.09    0.33
   5  -1  -5    5.21    0.58
  -5   1   6   28.04    0.74
   5  -1   6   28.66    1.07
   5   1  -6   28.16    1.46
  -5  -1  -6   29.45    1.47
   5  -1  -6   29.14    1.45
  -5   1  -6   28.18    1.34
   5   1   6   28.62    0.87
   5  -1   7   16.21    0.74
  -5  -1  -7   15.63    1.10
   5   1  -7   15.55    1.10
  -5   1   7   15.27    0.55
   5   1   7   15.75    0.59
  -5   1  -7   15.21    1.07
   5  -1  -7   14.70    1.00
  -5  -1   7   14.99    0.35
  -5   1   8    5.67    0.36
   5  -1   8    5.67    0.49
   5   1  -8    6.16    0.75
  -5  -1  -8    3.97    0.62
  -5  -1   8    5.68    0.26
   5  -1  -8    5.72    0.65
  -5   1  -8    6.38    0.82
   5   1   8    6.61    0.36
   5  -1   9   10.75    0.68
  -5   1   9   10.82    0.54
   5   1  -9   10.49    0.99
   5  -1  -9   11.19    0.93
  -5   1  -9   11.76    1.07
   5   1   9   10.19    0.48
   5   1   9   11.09    1.08
  -5  -1   9    9.92    0.42
  -5   1  10    8.97    0.54
   5   1 -10    9.56    0.98
   5  -1  10    8.87    0.61
  -5   1 -10   10.22    1.08
   5   1  10    8.43    0.42
   5  -1 -10    8.57    0.83
  -5  -1  10    8.48    0.44
   5   1  10    8.92    0.92
  -5   1  11    3.48    0.37
   5   1 -11    2.53    0.72
   5  -1  11    3.43    0.42
   5   1  11    3.73    0.32
  -5   1 -11    4.06    0.68
  -5  -1  11    3.82    0.34
   5  -1 -11    3.41    0.69
   5   1  11    3.76    0.86
   5   1 -12    2.07    0.67
   5  -1  12    2.33    0.39
  -5   1  12    2.12    0.33
   5   1  12    3.07    0.76
   5  -1 -12    2.34    0.64
  -5  -1  12    2.01    0.28
  -5   1 -12    2.44    0.76
   5  -1  13    0.93    0.33
  -5   1  13    1.08    0.29
   5   1 -13    1.55    0.53
  -5  -1  13    0.97    0.30
   5  -1 -13    0.57    0.54
   5   1  13    1.15    0.68
  -5   1 -13    1.76    0.64
   5   1 -14    0.12    0.56
   5  -1  14    0.36    0.30
  -5   1  14    0.69    0.33
   5   1  14   -0.09    0.63
  -5   1 -14    1.23    0.62
   5  -1 -14    0.89    0.52
   5   1 -15    0.13    0.53
   5   1  15    1.31    0.59
   5  -1 -15   -0.30    0.48
   5  -1  16   -0.12    0.62
   5   1 -16    1.40    0.63
   5   1  16    0.24    0.70
   5   1 -17   -0.42    0.64
   5  -1  17   -0.30    0.57
   5  -1 -17    0.99    0.47
   5   1 -18   -0.09    0.68
   5  -1  18    2.01    0.85
   5   1  18    0.21    0.86
   5  -1  19   -0.37    1.00
   5   1  19    2.00    1.01
   6  -1   0    0.09    0.15
  -6   1   0    0.21    0.11
  -6  -1   0    0.01    0.10
   6   1   0   -0.05    0.19
   6  -1   1   20.66    0.93
   6   1  -1   20.04    0.94
  -6  -1  -1   20.65    0.77
  -6   1   1   20.63    0.68
  -6   1  -1   20.20    0.82
  -6  -1   1   18.48    0.57
   6  -1  -1   19.93    0.93
   6   1   1   20.02    0.89
   6   1  -2   44.73    0.90
  -6  -1  -2   47.34    1.55
  -6   1   2   46.10    1.14
   6   1  -2   46.73    1.81
   6  -1   2   44.00    1.53
   6  -1  -2   42.00    1.61
   6   1   2   44.37    1.43
  -6   1  -2   43.16    1.47
   6   1  -3    3.91    0.10
   6   1  -3    4.73    0.53
  -6   1   3    4.63    0.24
   6  -1   3    4.03    0.43
  -6  -1  -3    4.47    0.46
   6  -1  -3    5.09    0.52
  -6   1  -3    3.83    0.48
   6   1   3    4.68    0.37
   6   1  -4    1.10    0.38
   6  -1   4    1.00    0.29
  -6   1   4    0.92    0.13
  -6  -1  -4    1.42    0.35
  -6   1  -4    1.49    0.35
   6  -1  -4    0.92    0.36
   6   1   4    0.93    0.20
   6   1  -5   13.66    0.97
   6  -1   5   13.85    0.71
  -6  -1  -5   14.56    0.97
  -6   1   5   13.46    0.42
   6  -1  -5   13.04    0.93
  -6   1  -5   13.13    0.92
   6   1   5   13.93    0.59
   6   1  -6   13.41    1.04
   6  -1   6   13.82    0.73
  -6   1   6   12.99    0.42
  -6  -1  -6   13.08    1.01
   6   1   6   13.17    0.58
   6  -1  -6   13.26    1.00
  -6   1  -6   12.95    0.96
   6   1  -7    4.01    0.67
  -6   1   7    3.86    0.25
   6  -1   7    4.48    0.43
  -6  -1  -7    4.25    0.66
   6   1   7    4.03    0.31
  -6   1  -7    4.09    0.63
   6  -1  -7    3.81    0.61
  -6  -1  -8    0.99    0.42
   6   1  -8    1.16    0.41
   6  -1   8    1.09    0.28
  -6   1   8    1.37    0.17
   6  -1  -8    1.12    0.45
  -6   1  -8    1.70    0.54
   6   1   8    1.00    0.20
   6  -1   9    5.37    0.47
   6   1  -9    5.24    0.82
  -6   1   9    4.94    0.33
  -6   1  -9    5.59    0.86
   6  -1  -9    5.23    0.75
   6   1   9    5.48    0.35
   6   1   9    5.77    0.88
   6   1 -10    0.49    0.47
  -6   1  10    0.31    0.19
   6  -1  10    0.17    0.24
   6  -1 -10    0.71    0.43
   6   1  10    0.52    0.20
  -6   1 -10    1.50    0.51
   6   1  10    1.00    0.51
   6   1 -11    2.08    0.61
   6  -1  11    2.02    0.34
  -6   1  11    1.33    0.23
  -6   1 -11    1.38    0.53
   6   1  11    2.30    0.69
   6   1  11    1.20    0.26
   6  -1 -11    1.61    0.53
   6  -1  12    0.66    0.28
  -6   1  12   -0.08    0.24
   6   1 -12    1.11    0.48
  -6   1 -12    1.09    0.49
   6  -1 -12    0.88    0.47
   6   1  12    0.50    0.57
   6  -1  13    0.32    0.32
   6   1 -13    1.51    0.59
   6   1  13    1.03    0.67
  -6   1 -13    1.17    0.53
   6  -1 -13    0.82    0.54
   6  -1  14    0.29    0.30
   6   1 -14   -0.10    0.60
   6   1  14    0.83    0.52
   6  -1 -14    1.06    0.54
  -6   1 -14    0.32    0.49
   6   1 -15   -0.43    0.49
   6   1  15    0.62    0.55
  -6   1 -15    0.09    0.31
   6   1 -16    0.61    0.79
   6  -1  16    1.57    0.91
   6  -1 -16    1.01    0.70
   6   1  16    2.03    0.86
   6   1 -17    0.20    0.66
   6   1  17    0.70    0.83
   6  -1 -17    1.29    0.70
   6  -1  18   -0.32    0.68
   6   1 -18   -0.08    0.64
   6   1  18    0.18    0.66
   7   1   0    0.45    0.23
  -7  -1   0    0.02    0.12
  -7   1   0    0.08    0.14
   7   1  -1    2.43    0.42
  -7  -1  -1    2.74    0.32
  -7   1   1    2.40    0.23
   7  -1   1    2.03    0.39
   7  -1  -1    2.40    0.37
  -7   1  -1    2.55    0.34
   7   1   1    2.18    0.39
  -7  -1   1    2.24    0.20
   7   1  -2    8.87    0.73
   7  -1   2    7.46    0.63
  -7  -1  -2    7.68    0.54
  -7   1   2    7.50    0.40
   7   1  -2    7.75    0.32
   7  -1  -2    7.78    0.69
  -7   1  -2    6.76    0.57
   7   1   2    8.30    0.60
  -7  -1  -3   25.12    1.19
   7   1  -3   23.22    0.47
   7   1  -3   24.59    1.22
   7  -1   3   24.44    1.09
  -7   1   3   24.96    0.75
   7  -1  -3   25.48    1.31
   7   1   3   24.13    1.00
  -7   1  -3   24.98    1.21
   7  -1   4   16.51    0.91
  -7  -1  -4   16.76    1.02
   7   1  -4   16.72    1.11
  -7   1   4   16.68    0.52
   7   1   4   16.60    0.80
   7  -1  -4   16.74    1.06
  -7   1  -4   15.41    0.99
   7  -1   5   16.83    0.91
   7   1  -5   15.89    1.10
  -7  -1  -5   17.27    1.13
  -7   1   5   15.24    0.47
   7  -1  -5   16.68    1.11
  -7   1  -5   16.53    1.10
   7   1   5   16.05    0.74
  -7  -1  -6    3.37    0.60
   7   1  -6    3.45    0.58
  -7   1   6    2.89    0.19
   7  -1   6    2.99    0.39
   7   1   6    2.90    0.32
  -7   1  -6    3.57    0.58
   7  -1  -6    4.47    0.63
   7   1  -7   17.21    1.27
  -7  -1  -7   16.27    1.26
   7  -1   7   16.54    0.92
  -7   1   7   15.30    0.47
   7  -1  -7   16.62    1.20
   7   1   7   17.04    0.78
  -7   1  -7   15.93    1.10
  -7  -1  -8    5.39    0.67
   7  -1   8    4.99    0.48
  -7   1   8    4.31    0.25
   7   1  -8    5.06    0.80
   7   1   8    4.81    0.39
   7  -1  -8    4.89    0.61
  -7   1  -8    5.47    0.84
   7   1  -9    0.94    0.49
   7  -1   9    0.41    0.26
   7   1   9    0.50    0.20
   7  -1  -9    0.25    0.44
  -7   1  -9    0.30    0.50
   7   1   9    1.01    0.44
   7  -1  10    0.53    0.29
   7   1 -10    0.08    0.48
   7   1  10    0.33    0.19
   7   1  10    0.25    0.53
   7  -1 -10    0.88    0.46
  -7   1 -10    0.30    0.49
   7   1 -11    1.56    0.69
   7  -1  11    1.94    0.37
   7  -1 -11    0.42    0.65
  -7   1 -11    1.74    0.73
   7   1  11    2.24    0.71
   7   1  11    1.71    0.31
   7   1 -12    1.03    0.62
   7  -1  12    0.52    0.37
   7   1  12    1.27    0.69
  -7   1 -12    1.69    0.65
   7  -1 -12    0.84    0.59
   7   1 -13    0.91    0.71
   7  -1  13    1.35    0.38
   7   1  13    1.84    0.78
   7  -1 -13    1.30    0.70
  -7   1 -13    0.83    0.59
   7   1 -14    1.38    0.60
  -7   1 -14    1.41    0.59
   7  -1 -14    0.59    0.60
   7   1  14   -0.50    0.74
   7   1 -15    0.40    0.55
  -7   1 -15   -0.10    0.48
   7   1  15   -0.48    0.60
   7  -1 -15   -0.36    0.52
   7   1 -16   -0.02    0.68
   7  -1  16    1.36    0.80
   7   1  16    0.15    0.75
   7  -1  17    1.71    0.97
   7   1 -17    0.89    0.82
   7   1  17    2.23    0.92
   7  -1 -17   -0.32    0.68
   7  -1  18   -0.18    0.95
   7   1 -18    0.83    0.89
   7   1  18    1.97    0.95
   8  -1   0    0.07    0.28
  -8  -1   0    0.35    0.16
   8   1   0   -0.21    0.28
  -8   1   0    0.54    0.21
  -8  -1  -1    1.12    0.25
   8   1  -1    1.54    0.40
  -8   1   1    1.32    0.25
   8  -1   1    1.04    0.37
  -8   1  -1    1.11    0.27
   8  -1  -1    1.35    0.33
  -8  -1   1    0.98    0.20
   8   1   1    1.25    0.37
  -8  -1  -2    0.42    0.24
   8   1  -2    0.27    0.14
  -8   1   2    0.50    0.17
   8   1  -2    0.62    0.38
   8  -1   2    0.94    0.31
   8   1   2    0.44    0.30
  -8   1  -2    0.44    0.28
   8  -1  -2    0.93    0.37
  -8   1   3    3.21    0.26
   8   1  -3    2.92    0.17
   8   1  -3    3.30    0.62
  -8  -1  -3    2.89    0.44
   8  -1   3    3.66    0.49
  -8   1  -3    3.89    0.50
   8   1   3    3.21    0.46
   8  -1  -3    4.37    0.58
  -8   1   4    1.91    0.20
   8  -1   4    2.45    0.43
   8   1  -4    2.33    0.54
  -8  -1  -4    1.69    0.49
   8  -1  -4    2.59    0.45
  -8   1  -4    1.95    0.43
   8   1   4    2.08    0.39
   8  -1   5   12.37    0.85
  -8   1   5   11.24    0.43
   8   1  -5   11.77    1.03
  -8  -1  -5   12.11    1.00
   8   1   5   11.58    0.73
  -8   1  -5   11.15    0.97
   8  -1  -5   12.52    1.02
   8   1  -6    3.42    0.64
   8  -1   6    3.49    0.51
  -8  -1  -6    3.71    0.65
  -8   1  -6    3.41    0.64
   8   1   6    2.82    0.37
   8  -1  -6    4.13    0.69
  -8  -1  -7    0.85    0.48
   8  -1   7    0.58    0.33
   8   1  -7    1.06    0.49
  -8   1  -7    1.12    0.49
   8  -1  -7    0.76    0.46
   8   1   7    0.44    0.23
   8   1  -8    2.13    0.64
   8  -1   8    1.65    0.41
  -8  -1  -8    1.61    0.51
  -8   1  -8    2.02    0.56
   8   1   8    1.71    0.34
   8  -1  -8    2.44    0.60
   8   1  -9    0.90    0.46
   8  -1   9    1.22    0.35
   8   1   9    0.65    0.31
   8  -1  -9    0.94    0.51
   8   1   9    0.98    0.62
  -8   1  -9    1.11    0.62
   8   1 -10    0.17    0.48
   8  -1  10   -0.15    0.26
   8   1  10    0.25    0.55
   8  -1 -10    0.24    0.38
   8   1  10    0.53    0.20
  -8   1 -10    0.23    0.51
   8   1 -11    0.22    0.43
   8  -1  11    0.00    0.22
   8  -1 -11   -0.04    0.39
  -8   1 -11    0.09    0.44
   8   1  11   -0.06    0.44
   8   1 -12   -0.17    0.51
   8  -1  12   -0.13    0.27
   8   1  12   -0.27    0.57
  -8   1 -12   -0.09    0.54
   8  -1 -12   -0.32    0.51
   8  -1  13    0.56    0.31
   8   1 -13   -0.37    0.57
   8   1  13    0.07    0.62
   8  -1 -13    0.19    0.58
   8   1 -14    0.04    0.62
  -8   1 -14    0.23    0.65
   8   1  14   -0.10    0.67
   8  -1 -14    1.15    0.62
   8   1 -15    1.18    0.63
  -8   1 -15   -0.03    0.36
   8   1  15    0.27    0.67
   8  -1 -15   -0.05    0.59
   8  -1 -16    0.06    0.66
   8   1  16    0.59    0.74
   8  -1  17    0.90    1.00
   8   1 -17    0.27    0.89
   8  -1 -17    1.56    0.85
   9   1   0    2.32    0.54
  -9   1   0    3.41    0.39
   9  -1   0    1.92    0.52
  -9  -1   0    2.55    0.31
   9  -1   1    1.18    0.43
  -9  -1  -1    1.56    0.30
  -9   1   1    1.47    0.28
   9   1  -1    1.00    0.46
  -9   1  -1    1.58    0.35
   9   1   1    1.23    0.44
   9  -1  -1    1.40    0.40
  -9  -1  -2    2.01    0.38
   9   1  -2    2.62    0.59
   9  -1   2    2.03    0.47
   9   1  -2    1.98    0.23
  -9   1   2    1.95    0.27
   9  -1  -2    2.19    0.56
   9   1   2    2.02    0.47
  -9   1  -2    2.89    0.43
   9  -1   3    5.16    0.65
  -9   1   3    5.65    0.39
   9   1  -3    6.74    0.81
  -9  -1  -3    5.65    0.65
   9  -1  -3    6.25    0.77
   9   1   3    5.14    0.64
  -9   1  -3    5.09    0.58
   9  -1   4    1.23    0.42
  -9  -1  -4    1.10    0.41
   9   1  -4    1.14    0.51
  -9   1   4    0.92    0.18
  -9   1  -4    1.09    0.39
   9  -1  -4    0.91    0.51
   9   1   4    1.01    0.34
  -9  -1  -5   12.67    1.10
   9  -1   5   12.38    0.94
   9   1  -5   12.75    1.16
  -9   1  -5   10.69    1.03
   9   1   5   12.35    0.85
   9  -1   6    0.69    0.38
   9   1  -6    0.27    0.49
  -9  -1  -6    0.97    0.49
   9  -1  -6    0.91    0.53
   9   1   6    0.76    0.33
  -9   1  -6    1.01    0.48
   9   1  -7    3.03    0.71
  -9  -1  -7    2.49    0.58
   9  -1   7    2.12    0.51
   9   1   7    1.92    0.41
  -9   1  -7    3.47    0.74
   9  -1  -7    3.19    0.70
   9   1  -8    2.16    0.52
   9  -1   8    1.43    0.43
  -9  -1  -8    0.85    0.52
  -9   1  -8    2.19    0.67
   9   1   8    0.78    0.31
   9  -1  -8    1.75    0.61
   9   1  -9    1.00    0.53
   9  -1   9    0.08    0.31
  -9   1  -9    1.29    0.55
   9   1   9    0.38    0.57
   9  -1  -9    0.49    0.48
   9   1   9    0.18    0.24
   9  -1  10    1.92    0.44
   9   1 -10    2.77    0.79
  -9   1 -10    2.29    0.79
   9   1  10    1.91    0.85
   9   1  10    1.73    0.34
   9  -1 -10    2.07    0.73
   9  -1  11    0.91    0.40
   9   1 -11    1.60    0.76
  -9   1 -11    1.19    0.74
   9  -1 -11    1.84    0.71
   9   1  11    1.75    0.79
   9   1 -12   -0.30    0.50
   9  -1  12   -0.10    0.27
  -9   1 -12   -0.19    0.41
   9   1  12    0.35    0.41
   9   1 -13    0.10    0.55
  -9   1 -13   -0.30    0.63
   9  -1 -13   -0.17    0.56
   9   1  13    1.55    0.64
   9   1 -14   -0.31    0.73
  -9   1 -14    0.91    0.74
   9   1  14    0.47    0.76
   9  -1 -14    1.22    0.72
   9   1 -15    0.49    0.91
   9  -1 -15    1.76    0.85
   9   1  15    1.50    0.78
   9  -1  16    1.18    0.87
   9   1 -16    1.22    0.81
   9   1  16   -0.49    0.82
   9  -1 -16    0.26    0.69
   9   1 -17   -0.27    0.85
   9  -1  17    2.15    0.90
   9   1  17   -0.01    0.85
   9  -1 -17   -0.09    0.73
 -10   1   0    3.61    0.46
  10  -1   0    4.55    0.69
  10   1   0    4.05    0.69
  10   1  -1    1.09    0.45
 -10  -1  -1    0.73    0.31
 -10   1   1    0.65    0.25
  10  -1   1   -0.05    0.43
  10   1  -1    0.46    0.25
  10  -1  -1    1.04    0.47
  10   1   1    0.62    0.42
 -10   1  -1    0.58    0.36
  10  -1   2    1.34    0.46
 -10  -1  -2    0.96    0.35
 -10   1   2    1.49    0.31
  10   1  -2    1.66    0.48
  10   1  -2    1.02    0.22
  10  -1  -2    1.27    0.54
 -10   1  -2    1.27    0.40
  10   1   2    1.54    0.48
  10   1  -3    0.99    0.47
 -10  -1  -3    0.76    0.32
  10  -1   3    0.77    0.37
 -10   1   3   -0.03    0.20
  10   1   3    0.70    0.36
  10  -1  -3    0.15    0.44
 -10   1  -3   -0.09    0.34
 -10   1   4    0.88    0.20
  10  -1   4    0.91    0.44
  10   1  -4    0.80    0.55
 -10  -1  -4    1.87    0.48
 -10   1  -4    1.47    0.47
  10  -1  -4    0.44    0.54
  10   1   4    0.99    0.44
  10  -1   5    0.29    0.38
  10   1  -5    0.18    0.50
 -10   1  -5    0.68    0.44
  10  -1  -5    0.70    0.49
  10   1   5    0.59    0.37
 -10  -1  -6    0.93    0.46
  10  -1   6    0.81    0.45
  10   1  -6    1.40    0.57
 -10   1  -6    0.48    0.57
  10  -1  -6    1.04    0.62
  10   1   6    0.83    0.39
 -10  -1  -7    0.84    0.52
  10   1  -7   -0.01    0.62
  10  -1   7    1.90    0.42
 -10   1  -7    1.83    0.65
  10   1   7    1.08    0.36
  10  -1  -7    0.98    0.64
  10  -1   8    0.43    0.35
 -10   1  -8   -0.17    0.50
  10   1   8    0.07    0.26
  10   1   8    0.76    0.53
  10  -1  -8   -0.07    0.48
  10  -1   9    0.18    0.38
  10   1  -9    1.47    0.55
  10  -1  -9    0.95    0.61
  10   1   9    1.07    0.69
 -10   1  -9    1.61    0.64
  10   1   9    0.54    0.32
  10   1 -10    2.41    0.64
  10  -1  10    0.54    0.37
  10  -1 -10    0.11    0.58
 -10   1 -10    0.70    0.63
  10   1  10   -0.16    0.69
  10   1  10    0.30    0.30
  10  -1  11    0.01    0.37
  10   1 -11   -0.01    0.65
  10  -1 -11    0.41    0.64
  10   1  11    1.45    0.70
 -10   1 -11    1.54    0.66
  10  -1  12    1.14    0.51
  10   1 -12    1.42    0.81
  10  -1 -12    1.83    0.75
  10   1  12    1.38    0.83
 -10   1 -12    0.10    0.79
  10   1 -13    0.50    0.73
  10  -1 -13    2.60    0.74
  10   1  13   -0.20    0.80
 -10   1 -13    0.08    0.74
  10  -1 -14   -0.47    0.62
  10   1  14    0.27    0.64
  10  -1  15   -0.29    0.74
  10  -1 -15   -0.08    0.68
  10   1  15   -0.14    0.73
  10   1 -16    0.40    0.82
  10  -1  16   -0.32    0.88
  10   1  16    1.03    0.86
  10  -1 -16    0.33    0.78
  11   1   0   -0.04    0.27
  11  -1   0    0.53    0.48
 -11   1   0    0.99    0.29
 -11   1   1    4.30    0.47
  11   1  -1    3.40    0.86
  11  -1   1    4.24    0.76
  11   1  -1    4.38    0.47
  11  -1  -1    4.10    0.82
 -11   1  -1    4.73    0.64
  11   1   1    4.33    0.74
  11   1  -2   -0.40    0.56
 -11   1   2    0.96    0.23
  11  -1  -2    0.05    0.52
 -11   1  -2    0.57    0.37
  11   1   2    0.36    0.46
  11  -1   3    0.77    0.41
 -11   1   3    0.32    0.21
 -11  -1  -3    0.40    0.31
  11   1  -3    0.13    0.40
  11   1   3    0.19    0.42
  11  -1  -3    0.24    0.41
 -11   1  -3    0.28    0.37
  11   1  -4    2.18    0.72
  11  -1   4    1.76    0.58
 -11  -1  -4    2.22    0.50
 -11   1  -4    2.35    0.66
  11   1   4    0.82    0.57
  11  -1  -4    2.03    0.71
  11  -1   5    3.59    0.72
 -11  -1  -5    3.08    0.68
  11   1  -5    3.76    0.92
  11   1   5    4.56    0.70
  11  -1  -5    4.44    0.97
 -11   1  -5    4.90    0.86
  11   1  -6    0.08    0.52
  11  -1   6    0.73    0.41
  11   1   6   -0.17    0.33
  11  -1  -6    0.57    0.56
 -11   1  -6    0.88    0.53
  11  -1   7    2.60    0.52
  11   1  -7    2.17    0.79
  11  -1  -7    1.69    0.68
  11   1   7    1.57    0.51
  11   1   7    2.15    0.82
 -11   1  -7    2.55    0.81
  11   1  -8    0.87    0.57
  11  -1   8    1.22    0.51
  11   1   8    0.30    0.38
  11   1   8    0.80    0.72
  11  -1  -8    1.53    0.67
 -11   1  -8    0.98    0.65
  11   1  -9   -0.35    0.62
 -11   1  -9    0.49    0.63
  11  -1  -9    0.71    0.59
  11   1   9   -0.32    0.68
  11   1   9    0.65    0.33
  11  -1  10    0.24    0.50
  11   1 -10    0.10    0.70
  11   1  10    1.48    0.80
 -11   1 -10    1.19    0.69
  11  -1 -10    0.78    0.66
  11   1 -11    0.18    0.71
  11  -1  11    0.51    0.43
  11  -1 -11    2.73    0.71
 -11   1 -11   -0.39    0.70
  11   1  11   -0.18    0.76
  11   1 -12    0.54    0.72
  11   1  12    0.66    0.61
 -11   1 -12    0.04    0.71
  11   1 -13    0.15    0.81
  11  -1 -13    2.59    0.80
 -11   1 -13   -0.52    0.84
  11   1  13    0.61    0.85
  11   1 -14    0.52    0.79
  11  -1 -14    1.06    0.87
 -11   1 -14    1.77    0.74
  11   1  14    0.25    0.94
  11   1 -15    1.69    0.90
  11  -1  15    0.13    0.79
  11  -1 -15    0.47    0.87
  11   1  15    0.42    0.95
  12   1   0    0.29    0.28
  12   1   0    0.50    0.50
 -12   1   0    0.13    0.30
  12  -1   0    0.96    0.50
  12   1  -1    1.04    0.55
  12  -1   1   -0.05    0.49
 -12   1   1    0.16    0.26
 -12   1  -1   -0.01    0.35
  12   1   1    0.38    0.47
  12  -1  -1    0.54    0.50
  12   1   1    0.42    0.30
  12   1  -2    1.74    0.71
 -12   1   2    1.00    0.31
  12  -1   2    2.01    0.62
  12   1   2    0.82    0.45
  12  -1  -2    1.15    0.56
  12   1   2    1.44    0.61
 -12   1  -2    1.31    0.51
  12   1  -3    2.25    0.69
  12  -1   3    0.27    0.60
  12  -1  -3    1.01    0.69
 -12   1  -3    1.20    0.63
  12   1   3    1.24    0.58
  12   1   3    1.06    0.57
  12  -1   4    0.17    0.51
  12   1  -4    1.12    0.61
  12   1   4    0.39    0.54
  12   1   4    0.88    0.46
 -12   1  -4   -0.01    0.59
  12  -1  -4    0.47    0.60
  12  -1   5    0.98    0.51
  12   1  -5    1.00    0.54
  12   1   5    1.07    0.60
  12  -1  -5    1.12    0.70
  12   1   5   -0.28    0.51
 -12   1  -5    0.56    0.66
  12  -1   6    0.31    0.44
  12   1  -6    0.83    0.65
  12   1   6    0.74    0.44
  12   1   6    0.29    0.58
 -12   1  -6    0.69    0.61
  12  -1  -6    1.34    0.70
  12  -1   7    0.85    0.49
  12   1   7    0.56    0.70
  12  -1  -7    0.17    0.66
  12   1  -8   -0.01    0.61
  12   1   8    0.21    0.36
 -12   1  -8    0.25    0.58
  12   1   8   -0.10    0.63
  12  -1  -8    0.69    0.58
  12  -1   9    0.83    0.50
  12   1  -9    1.29    0.70
  12  -1  -9    0.23    0.67
  12   1   9    0.05    0.79
  12   1   9    0.60    0.40
 -12   1  -9   -0.31    0.69
  12   1 -10   -0.08    0.71
  12   1  10   -0.07    0.80
 -12   1 -10    1.02    0.56
  12   1 -11    0.05    0.77
  12   1  11    0.16    0.76
 -12   1 -11    1.36    0.75
  12   1 -12    0.22    0.71
  12   1  12    0.25    0.75
 -12   1 -12    0.53    0.73
  12   1 -13   -0.07    0.90
 -12   1 -13    1.04    0.73
  12   1  13    1.46    0.91
  12  -1  14   -0.21    0.62
  12  -1 -14    0.23    0.60
  12   1  14   -0.01    0.59
 -13   1   0    0.76    0.43
  13   1   0    1.57    0.70
  13  -1   0    0.74    0.67
  13   1  -1    1.79    0.74
 -13   1   1    0.57    0.39
  13  -1   1    1.87    0.68
 -13   1  -1    0.80    0.49
  13  -1  -1    1.50    0.71
  13   1   1    0.99    0.41
  13   1   1    1.62    0.66
  13  -1   2    1.22    0.67
  13   1  -2    1.97    0.77
  13   1   2    0.87    0.46
 -13   1  -2    1.25    0.60
  13  -1  -2    0.94    0.71
  13   1   2    0.37    0.63
  13  -1   3    2.49    0.81
  13   1  -3    2.08    0.90
 -13   1  -3    2.47    0.70
  13   1   3    1.61    0.78
  13   1   3    3.08    0.75
  13  -1  -3    1.79    0.85
  13  -1   4    0.92    0.60
  13   1  -4    0.44    0.71
  13  -1  -4    1.03    0.72
 -13   1  -4    0.52    0.56
  13   1   4    0.32    0.62
  13   1   4    1.27    0.59
  13  -1   5    2.30    0.65
  13   1  -5    1.18    0.82
  13  -1  -5   -0.17    0.87
 -13   1  -5    1.06    0.78
  13   1   5    1.97    0.75
  13   1   5    1.30    0.65
  13  -1   6    0.43    0.58
  13   1  -6    0.88    0.66
 -13   1  -6    2.11    0.70
  13   1   6   -0.13    0.54
  13   1   6    0.32    0.68
  13  -1  -6   -0.09    0.73
  13   1  -7    0.13    0.65
  13  -1   7    0.16    0.45
 -13   1  -7    0.31    0.63
  13  -1  -7    0.02    0.64
  13   1   7    1.33    0.62
  13   1  -8    1.01    0.62
  13  -1   8    1.24    0.49
  13   1   8    0.46    0.80
  13   1   8   -0.01    0.50
  13   1  -9    1.16    0.91
 -13   1  -9    1.63    0.85
  13   1   9    1.52    0.95
  13  -1  10    1.03    0.62
  13   1 -10    1.81    0.88
  13  -1 -10    0.62    0.82
  13   1  10   -0.35    0.95
 -13   1 -10    1.33    0.82
  13   1 -11    1.41    0.82
 -13   1 -11    0.74    0.83
  13  -1 -11    0.39    0.88
  13   1  11   -0.05    0.92
  13   1 -12    0.14    1.01
  13   1  12    0.15    1.01
 -13   1 -12    2.44    0.79
  13  -1 -12    1.59    0.97
  13   1 -13    0.21    0.93
  13   1  13    1.55    0.97
  13  -1 -13    0.39    0.94
  14  -1   0    0.26    0.55
  14   1   0   -0.01    0.57
  14  -1   1    0.21    0.70
  14   1  -1    1.59    0.76
  14  -1  -1    1.85    0.70
  14   1   1    0.27    0.73
 -14   1  -1    0.31    0.54
  14  -1   2    1.12    0.74
  14   1  -2    2.19    0.81
  14   1   2    0.93    0.51
  14  -1  -2    2.03    0.78
  14   1   2    1.33    0.70
 -14   1  -2    0.13    0.64
  14  -1   3    1.54    0.73
  14   1  -3    1.63    0.75
 -14   1  -3    0.82    0.59
  14   1   3    0.41    0.61
  14   1   3    1.05    0.68
  14  -1  -3    1.06    0.78
  14   1  -4    1.23    0.77
  14   1   4    0.06    0.61
 -14   1  -4    0.01    0.70
  14   1   4    1.25    0.57
  14  -1  -4    1.80    0.79
  14  -1   5    0.99    0.67
  14   1  -5    1.28    0.78
  14   1   5    2.38    0.57
  14   1   5    0.21    0.61
 -14   1  -5   -0.12    0.75
  14  -1  -5   -0.48    0.85
  14   1  -6    1.05    0.79
  14  -1   6    1.73    0.66
  14   1   6    1.50    0.59
  14  -1  -6    0.01    0.83
 -14   1  -6    1.03    0.73
  14   1   6    0.07    0.79
  14  -1   7   -0.23    0.65
  14   1  -7   -0.50    0.81
  14   1   7    0.63    0.80
  14   1   7    1.91    0.55
  14  -1  -7    1.14    0.81
  14  -1   8    1.15    0.75
  14   1  -8    2.53    0.97
 -14   1  -8    4.52    0.84
  14   1   8   -0.29    0.84
  14  -1  -8   -0.16    0.93
  14  -1   9    1.18    0.73
  14  -1  -9    0.90    0.93
  14   1   9    1.46    0.97
 -14   1 -10    0.95    0.83
  14  -1 -10    0.67    0.85
  14   1  10   -0.02    0.91
  14   1 -11    1.43    1.10
  14  -1 -11    2.57    1.10
  14   1  11    1.40    1.14
 -14   1 -11    1.16    0.85
  15   1   0    1.34    0.89
  15   1  -1    0.09    0.81
  15   1   1    0.85    0.83
  15  -1  -1    1.92    0.82
  15  -1   2    2.76    0.81
  15   1  -2    0.05    0.74
  15  -1  -2    1.60    0.69
  15   1   2    1.51    0.89
  15   1  -3    0.57    0.87
  15  -1  -3    1.77    0.90
  15   1  -4    1.39    0.93
  15  -1   4    3.28    0.83
  15  -1  -4   -0.04    1.02
 -15   1  -4    1.22    0.72
  15  -1   5    3.85    0.86
  15   1  -5    1.42    0.95
 -15   1  -5    2.03    0.89
  15  -1  -5    1.24    1.03
  15   1   5    1.40    0.72
  15   1   5    0.56    0.76
  15  -1   6    2.67    0.86
  15   1  -6    2.05    0.77
 -15   1  -6    1.16    0.93
  15   1   6    0.20    0.78
  15  -1  -6    2.06    0.96
  15   1   6    1.19    0.81
  15   1  -7   -0.36    0.78
  15   1   7    1.26    0.77
  15  -1  -7    0.15    0.63
  15  -1   8    1.75    0.81
  15  -1  -8   -0.10    0.90
  15   1   8    1.32    0.97
 -15   1  -8    1.39    0.89
  15  -1  -9   -0.61    0.69
 -15   1  -9    0.06    0.66
  15   1   9    0.32    0.72
  15   1 -10    1.26    1.05
 -15   1 -10    1.43    0.82
  16   1   0    0.05    0.84
  16  -1   0    1.41    0.83
  16   1  -1   -0.42    0.80
  16  -1   1    0.67    0.80
  16  -1  -1    1.50    0.78
  16  -1   2    1.38    0.86
  16   1  -2    0.55    0.91
  16  -1   3    0.17    0.86
  16   1  -3    1.63    0.93
  16   1   3    1.15    0.79
  16   1  -4    1.75    1.00
  16  -1   4    1.17    0.94
  16   1   4    1.58    0.84
  16   1  -5    1.89    0.94
  16  -1   5    1.35    0.85
  16  -1  -5   -0.50    0.95
  16   1  -6    2.30    1.06
  16  -1   6    1.41    0.97
  16   1  -7    0.40    1.04
 -16   1  -7    1.59    1.02
  16  -1  -7    1.56    0.98
  17  -1   0    0.03    0.89
  17   1   0    1.37    0.90
  17   1  -1    0.42    0.98
  17  -1   1    1.24    0.93
  17  -1  -1    1.47    1.04
  17   1  -2    1.19    0.96
  17   1   2   -0.40    0.85
  17  -1  -2    1.97    1.01
  17   1  -3    1.88    1.03
  17  -1   3    2.10    1.00
  17   1   3    1.24    0.91
  17  -1  -3   -0.17    1.06
   0   2   0  248.06    3.32
   0  -2   0  240.59    3.26
   0  -2   0  250.53    3.13
   0   2   1    0.03    0.07
   0   2  -1    0.19    0.09
   0   2  -1    0.02    0.07
   0   2   1    0.10    0.05
   0   2  -2 1075.28   12.01
   0   2   2 1061.66    8.47
   0   2  -2 1069.13   13.34
   0   2   2 1071.40   12.91
   0   2   3    0.09    0.11
   0   2   3    0.01    0.03
   0   2  -3    0.00    0.11
   0   2  -3   -0.02    0.09
   0  -2  -3    0.05    0.04
   0   2   4   80.06    1.91
   0  -2  -4   85.47    1.20
   0   2  -4   78.65    1.74
   0   2  -4   82.96    2.05
   0   2   4   80.87    1.09
   0   2   5    0.04    0.14
   0   2  -5   -0.02    0.11
   0  -2  -5    0.08    0.06
   0   2  -5   -0.04    0.12
   0   2  -6    6.69    0.50
   0   2   6    7.34    0.51
   0   2  -6    6.85    0.45
   0  -2  -6    6.77    0.27
   0  -2  -7    0.07    0.09
   0   2  -7   -0.08    0.18
   0   2  -7   -0.01    0.20
   0   2   7    0.22    0.21
   0   2  -8    8.77    0.66
   0  -2  -8    8.18    0.39
   0   2   8    7.92    0.67
   0   2  -8    7.57    0.60
   0  -2  -9   -0.02    0.13
   0   2   9   -0.18    0.27
   0   2  -9   -0.05    0.23
   0   2  -9   -0.17    0.25
   0   2  10   21.84    1.30
   0  -2 -10   22.60    0.90
   0   2 -10   20.95    1.23
   0   2 -10   22.30    1.30
   0   2  11    0.06    0.33
   0  -2 -11    0.25    0.18
   0   2 -11    0.02    0.28
   0   2 -12   15.97    1.11
   0   2 -12   15.86    1.13
   0   2  12   14.99    1.22
   0  -2 -12   14.04    0.70
   0   2 -13   -0.26    0.32
   0   2 -13   -0.10    0.38
   0   2  13   -0.16    0.40
   0  -2 -13    0.59    0.23
   0   2 -14    1.54    0.49
   0   2 -14    1.08    0.56
   0   2  14    1.22    0.61
   0   2  15    0.06    0.57
   0   2 -15    0.80    0.50
   0  -2  15    0.96    0.58
   0  -2  16    1.82    0.71
   0   2 -16    1.33    0.56
   0   2  16    1.40    0.69
   0  -2  17    0.60    0.56
   0   2  17    0.38    0.56
   0   2 -17   -0.11    0.41
   0  -2  18    1.20    0.65
   0   2  18    0.26    0.74
   0   2  19   -0.29    0.65
   0  -2  19    0.63    0.64
   0   2  20    2.04    0.99
   1   2   0    6.92    0.24
  -1   2   0    6.51    0.27
  -1  -2   0    6.57    0.24
   1  -2   0    6.57    0.26
   1   2   0    6.73    0.24
   1  -2   1   77.25    1.46
  -1   2   1   74.56    1.38
   1   2  -1   70.31    1.17
  -1  -2  -1   74.87    1.11
   1   2  -1   83.01    1.64
   1  -2  -1   74.87    1.26
  -1   2  -1   74.66    1.42
  -1  -2   1   73.54    1.24
   1   2   1   76.63    1.42
   1   2   1   75.49    1.07
   1   2  -2    1.42    0.23
  -1  -2  -2    1.72    0.07
  -1   2   2    1.65    0.18
   1  -2   2    1.71    0.19
  -1   2  -2    1.73    0.15
   1   2   2    1.57    0.19
   1   2  -3    6.98    0.42
  -1  -2  -3    6.42    0.08
   1  -2   3    5.72    0.34
  -1  -2  -3    6.45    0.07
  -1   2   3    6.51    0.33
  -1   2  -3    6.70    0.35
   1   2   3    6.36    0.33
  -1   2   4    7.26    0.40
   1   2  -4    7.23    0.47
  -1   2  -4    6.86    0.39
  -1   2  -4    6.60    0.35
   1  -2  -4    7.02    0.26
   1   2   4    6.66    0.42
  -1   2   5    1.62    0.22
  -1  -2  -5    1.39    0.06
   1   2  -5    1.31    0.29
   1   2  -5    1.78    0.15
   1   2   5    1.85    0.28
  -1   2  -5    1.71    0.24
  -1   2  -5    1.85    0.23
   1  -2  -5    1.77    0.18
   1   2   5    1.46    0.06
   1   2  -6    8.88    0.43
  -1   2   6    8.06    0.49
   1   2  -6    9.62    0.63
  -1  -2  -6    8.08    0.22
   1   2   6    8.28    0.58
  -1   2  -6    8.34    0.52
  -1   2  -6    8.13    0.51
   1  -2  -6    8.61    0.35
   1   2  -7   32.25    1.12
  -1  -2  -7   32.70    0.69
  -1   2   7   33.17    1.28
   1   2  -7   35.57    1.52
  -1   2  -7   34.76    1.36
   1   2   7   33.27    1.43
  -1   2  -7   34.64    1.38
   1  -2  -7   33.46    0.99
   1   2  -8   13.42    0.68
   1   2  -8   13.20    0.83
  -1  -2  -8   13.10    0.42
  -1   2   8   13.15    0.83
  -1   2  -8   14.13    0.83
  -1   2  -8   12.66    0.85
   1  -2  -8   13.49    0.58
   1   2   8   13.62    0.92
   1   2  -9    5.74    0.53
   1   2  -9    6.04    0.65
  -1  -2  -9    5.92    0.30
  -1   2   9    5.87    0.60
   1  -2  -9    5.87    0.39
  -1   2  -9    6.73    0.65
  -1   2  -9    6.12    0.61
   1   2   9    6.66    0.71
  -1   2  10    5.46    0.64
   1   2 -10    5.66    0.66
   1   2 -10    5.92    0.62
  -1  -2 -10    5.71    0.33
  -1   2 -10    6.85    0.69
   1   2  10    6.00    0.75
   1  -2 -10    5.40    0.47
  -1   2 -10    6.14    0.61
   1   2 -11    6.99    0.71
  -1   2  11    6.59    0.72
  -1  -2 -11    6.76    0.40
   1   2 -11    5.86    0.74
  -1   2 -11    7.09    0.85
  -1   2 -11    7.02    0.72
   1  -2 -11    6.50    0.48
   1   2  11    7.16    0.84
  -1  -2 -12    1.55    0.27
   1   2 -12    1.96    0.53
  -1   2  12    1.98    0.53
   1   2 -12    0.90    0.49
   1  -2 -12    1.82    0.36
  -1   2 -12    1.79    0.53
   1   2  12    2.09    0.59
  -1   2 -12    1.70    0.48
   1   2 -13   -0.03    0.33
   1   2 -13    0.29    0.23
  -1   2  13    0.22    0.29
   1   2  13   -0.17    0.36
  -1   2 -13   -0.25    0.36
  -1   2 -13   -0.13    0.26
   1   2 -14   -0.10    0.46
  -1   2  14    0.41    0.44
   1   2  14    0.90    0.53
  -1   2 -14    1.29    0.49
   1  -2 -14    0.03    0.26
  -1  -2  14    0.80    0.42
  -1   2 -14    0.67    0.39
  -1   2  15    2.87    0.70
   1   2 -15    1.80    0.67
  -1  -2  15    2.29    0.68
  -1   2 -15    1.81    0.54
   1   2  15    2.11    0.77
  -1   2  16    1.22    0.60
   1  -2  16    1.24    0.72
   1   2 -16    0.84    0.56
   1   2  16   -0.17    0.69
  -1  -2  16    0.85    0.52
   1  -2  17    1.84    0.71
   1   2 -17    0.58    0.62
  -1   2  17    1.55    0.65
  -1  -2  17   -0.02    0.61
   1   2  17   -0.16    0.72
   1  -2  18    1.12    0.65
   1   2 -18   -0.22    0.56
   1   2  18    1.32    0.72
   1  -2  19    1.25    0.90
   1   2  19    1.77    0.94
   1   2  20   -0.43    0.72
   2   2   0    1.08    0.13
   2  -2   0    1.31    0.16
   2   2   0    1.07    0.11
  -2   2   0    1.18    0.15
  -2   2   1   68.18    1.34
   2   2  -1   65.59    1.04
   2  -2   1   70.30    1.48
   2   2  -1   68.27    1.52
   2   2   1   64.74    1.33
   2  -2  -1   67.97    1.39
  -2  -2   1   64.17    1.07
  -2   2  -1   66.99    1.43
   2   2   1   68.31    1.17
   2  -2   2  480.64    7.16
  -2  -2  -2  455.77    4.57
   2   2  -2  475.47    7.79
   2   2  -2  474.85    4.83
  -2   2   2  475.76    6.44
  -2  -2   2  466.48    5.02
  -2   2  -2  456.15    7.23
   2  -2  -2  470.92    6.67
   2   2   2  480.27    7.51
   2   2   2  475.62    4.69
  -2  -2  -3   92.80    0.87
   2   2  -3   93.15    1.39
   2  -2   3   93.76    2.03
   2   2  -3   94.57    2.28
  -2   2   3   92.35    1.85
  -2   2  -3   91.14    2.14
   2   2   3   91.56    0.89
   2  -2  -3   92.93    1.83
   2   2   3   94.43    2.20
   2   2  -4   62.74    1.15
   2  -2   4   63.90    1.63
   2   2  -4   63.10    1.85
  -2   2   4   64.08    1.50
   2   2   4   63.74    1.80
  -2   2  -4   61.42    1.70
   2  -2  -4   62.90    1.44
   2   2  -5   25.88    0.67
   2  -2   5   22.53    0.82
  -2   2   5   22.70    0.77
   2   2  -5   22.85    0.98
  -2   2  -5   21.34    0.91
   2  -2  -5   22.99    0.75
   2   2   5   22.99    0.99
   2   2  -6    1.07    0.16
  -2   2   6    1.13    0.22
   2  -2   6    1.17    0.22
   2   2  -6    1.35    0.33
   2  -2  -6    1.17    0.18
  -2   2  -6    1.64    0.30
   2   2   6    1.03    0.05
   2   2   6    0.81    0.31
   2   2  -7    0.77    0.37
  -2   2   7    1.61    0.30
   2   2  -7    1.49    0.19
   2  -2   7    1.25    0.28
   2  -2  -7    0.66    0.19
   2   2   7    1.32    0.32
   2   2   7    1.34    0.08
  -2   2  -7    1.77    0.37
   2   2  -8    6.46    0.64
   2  -2   8    5.76    0.50
  -2   2   8    5.94    0.47
   2   2   8    6.25    0.22
  -2   2  -8    7.00    0.66
   2   2   8    6.61    0.59
   2   2  -9   12.07    0.72
  -2   2   9   17.53    0.94
   2   2  -9   17.52    1.11
   2  -2   9   17.61    0.90
  -2   2  -9   17.75    1.14
   2   2   9   17.61    0.47
   2   2   9   17.79    1.14
   2   2 -10    9.06    0.60
  -2   2  10    8.12    0.69
   2   2 -10    9.22    0.86
   2  -2  10    8.62    0.67
   2   2  10    7.16    0.31
  -2   2 -10    8.68    0.83
   2   2  10    8.12    0.88
   2   2 -11    2.27    0.41
   2  -2  11    1.86    0.39
   2   2 -11    2.11    0.57
  -2   2  11    1.71    0.45
   2   2  11    2.20    0.20
   2  -2 -11    0.58    0.31
  -2   2 -11    2.26    0.63
   2   2  11    2.33    0.61
  -2   2  12   16.10    1.04
   2   2 -12   15.61    1.23
   2  -2  12   15.29    1.02
   2   2  12   16.28    1.36
   2  -2 -12   14.37    0.87
  -2   2 -12   16.57    1.37
   2   2 -13    1.10    0.55
   2  -2  13    0.80    0.38
  -2   2  13    1.28    0.48
   2  -2 -13    1.53    0.39
  -2   2 -13    0.45    0.61
  -2  -2  13    1.05    0.42
   2   2  13    1.95    0.64
   2   2 -14    0.88    0.49
   2  -2  14    1.40    0.40
  -2   2  14    1.56    0.51
   2   2  14    0.97    0.64
  -2  -2  14    0.91    0.49
   2  -2 -14    0.78    0.38
  -2   2 -14    1.59    0.63
   2   2 -15   -0.09    0.55
  -2   2  15    1.36    0.48
   2  -2  15   -0.19    0.38
  -2   2 -15    0.57    0.58
   2  -2 -15    0.75    0.38
   2   2  15    1.58    0.63
  -2  -2  15    0.82    0.42
   2  -2  16    0.40    0.75
   2  -2  16    0.92    0.50
   2   2 -16    1.04    0.62
  -2   2  16    1.40    0.50
  -2  -2  16    0.54    0.55
   2   2  16    0.82    0.70
   2   2 -17    1.30    0.65
  -2   2  17    1.04    0.60
   2  -2  17   -0.27    0.79
  -2  -2  17    0.71    0.52
   2   2  17    1.65    0.77
  -2   2  18    1.46    0.71
   2  -2  18    1.84    0.93
   2   2 -18    1.28    0.68
   2   2  18    1.13    0.79
   2  -2  19    1.83    0.99
   2   2  20    1.65    1.09
   3  -2   0  128.34    2.61
  -3   2   0  127.99    2.42
   3   2   0  128.85    2.52
   3  -2   1   10.38    0.47
   3   2  -1   10.90    0.30
   3   2  -1   10.79    0.46
  -3   2   1   10.94    0.41
   3   2   1   11.27    0.44
   3   2   1   11.08    0.38
   3  -2  -1   10.24    0.47
  -3   2  -1   10.91    0.46
   3   2  -2   30.12    0.97
   3   2  -2   29.27    0.51
   3  -2   2   28.71    0.89
  -3   2   2   29.05    0.76
  -3  -2   2   29.87    0.54
   3   2   2   28.37    0.64
   3   2   2   29.76    0.92
   3  -2  -2   29.23    0.89
  -3   2  -2   30.43    0.96
  -3   2   3    7.88    0.33
   3  -2   3    8.11    0.43
   3   2  -3    8.65    0.51
   3   2  -3    8.39    0.20
   3   2   3    8.28    0.48
  -3   2  -3    8.16    0.47
   3   2   3    7.52    0.22
   3  -2  -3    7.77    0.41
   3  -2   4   13.45    0.59
   3   2  -4   13.53    0.32
   3   2  -4   13.25    0.71
  -3   2   4   13.22    0.47
   3   2   4   12.94    0.27
   3   2   4   12.88    0.67
  -3   2  -4   12.59    0.64
   3  -2  -4   12.94    0.58
   3   2  -5    0.63    0.10
   3   2  -5    0.65    0.24
   3  -2   5    1.04    0.22
  -3   2   5    0.59    0.16
   3   2   5    0.66    0.06
   3   2   5    0.61    0.28
  -3   2  -5    1.15    0.28
   3  -2  -5    0.51    0.20
   3  -2   6   15.83    0.75
   3   2  -6   15.70    0.51
  -3   2   6   15.60    0.67
   3   2  -6   15.80    0.93
   3   2   6   16.99    0.31
  -3   2  -6   15.35    0.92
   3   2   6   15.02    0.90
   3  -2  -6   16.95    0.77
   3   2  -7    0.47    0.13
   3   2  -7    0.32    0.30
   3  -2   7    0.35    0.23
  -3   2   7    0.33    0.17
   3   2   7    0.13    0.30
   3   2   7    0.19    0.05
  -3   2  -7    0.05    0.31
   3  -2  -7    0.57    0.23
   3  -2   8    2.35    0.39
   3   2  -8    2.27    0.29
   3   2  -8    2.77    0.51
  -3   2   8    2.60    0.30
   3   2   8    2.39    0.12
   3  -2  -8    2.47    0.38
   3   2   8    2.40    0.52
  -3   2  -8    2.41    0.52
   3   2  -9    2.73    0.54
   3   2  -9    1.92    0.31
   3  -2   9    1.94    0.36
  -3   2   9    2.36    0.39
   3   2   9    2.73    0.55
   3   2   9    2.03    0.14
  -3   2  -9    2.43    0.53
   3  -2  -9    2.48    0.41
  -3   2  10    4.23    0.46
   3  -2  10    4.09    0.51
   3   2 -10    4.69    0.66
   3   2  10    3.73    0.21
  -3   2 -10    3.76    0.67
   3   2  10    3.82    0.70
   3  -2 -10    3.97    0.51
  -3   2  11    3.88    0.53
   3   2 -11    3.85    0.73
   3  -2  11    4.12    0.51
   3  -2 -11    4.01    0.55
   3   2  11    4.51    0.77
  -3   2 -11    4.80    0.70
  -3  -2  11    4.62    0.46
  -3   2  12    0.26    0.37
   3   2 -12    0.64    0.49
   3  -2  12    0.90    0.35
  -3  -2  12    0.03    0.27
  -3   2 -12    0.31    0.52
   3   2  12    0.99    0.49
   3  -2 -12    0.51    0.31
  -3   2  13    0.57    0.42
   3   2 -13    1.25    0.63
   3  -2  13    1.05    0.45
  -3  -2  13    1.56    0.37
   3  -2 -13    1.09    0.38
   3   2  13    1.57    0.66
  -3   2 -13    1.60    0.66
   3   2 -14    1.18    0.50
  -3   2  14    0.66    0.44
   3  -2  14    0.01    0.36
   3   2  14    0.18    0.59
  -3  -2  14    0.01    0.32
   3  -2 -14    0.89    0.34
  -3   2 -14    1.46    0.58
  -3   2  15    1.86    0.51
   3   2 -15    0.73    0.57
   3  -2  15    0.84    0.40
  -3  -2  15    1.18    0.39
   3   2  15   -0.17    0.69
  -3   2 -15    1.38    0.64
   3  -2 -15   -0.15    0.38
   3   2 -16    1.32    0.58
  -3   2  16    0.89    0.47
  -3  -2  16    0.78    0.42
   3   2  16   -0.24    0.71
  -3   2 -16   -0.13    0.52
   3  -2  17    4.20    0.99
   3   2 -17    0.10    0.76
   3  -2  18    0.46    0.67
   3   2 -18   -0.19    0.58
   3   2  18    0.36    0.68
   3  -2  19    1.07    0.80
   3   2  19   -0.42    0.82
  -4   2   0   56.32    1.36
   4  -2   0   57.21    1.51
   4   2   0   45.11    1.06
   4   2   0   56.11    1.45
   4  -2   1   26.24    0.89
  -4   2   1   26.83    0.79
   4   2  -1   28.43    0.63
   4   2  -1   27.87    0.98
   4   2   1   27.50    0.84
   4   2   1   26.54    0.82
   4  -2  -1   26.34    0.94
  -4   2  -1   26.09    0.88
  -4   2   2   27.49    0.77
   4   2  -2   26.64    0.47
   4  -2   2   27.01    0.92
   4   2  -2   26.58    1.03
   4   2   2   28.83    0.95
   4  -2  -2   27.19    0.99
   4   2   2   29.00    0.78
  -4   2  -2   26.41    0.96
  -4   2   3   37.31    0.93
   4  -2   3   37.65    1.20
   4   2  -3   35.39    0.45
   4   2  -3   37.21    1.36
   4   2   3   37.15    0.86
   4  -2  -3   36.94    1.21
  -4   2  -3   35.14    1.22
   4   2   3   36.17    1.23
  -4  -2   3   33.95    0.48
  -4   2   4   13.33    0.49
   4  -2   4   13.13    0.65
   4   2  -4   13.12    0.80
   4   2  -4   13.27    0.23
   4   2   4   13.41    0.75
   4  -2  -4   12.58    0.68
   4   2   4   12.64    0.39
  -4   2  -4   12.33    0.71
   4   2  -5   10.37    0.78
   4  -2   5   11.56    0.63
  -4   2   5   11.27    0.47
   4   2  -5   11.00    0.26
   4   2   5   10.66    0.32
   4   2   5   10.86    0.76
   4  -2  -5    9.82    0.64
  -4   2  -5   10.40    0.66
   4  -2   6   31.67    1.17
  -4   2   6   31.21    0.96
   4   2  -6   28.15    0.60
   4   2  -6   30.87    1.48
   4   2   6   29.64    0.61
   4  -2  -6   30.36    1.25
  -4   2  -6   31.01    1.36
  -4   2   7   26.26    0.93
   4   2  -7   24.92    1.42
   4  -2   7   24.69    1.10
   4  -2  -7   26.89    1.28
  -4   2  -7   24.56    1.41
   4   2   7   25.25    0.57
   4   2   7   23.70    1.29
   4   2  -8   33.81    1.77
   4  -2   8   35.78    1.42
  -4   2   8   35.87    1.23
   4   2   8   35.08    1.80
   4  -2  -8   35.06    1.52
  -4   2  -8   33.51    1.63
   4   2   8   33.67    0.71
  -4  -2   8   33.74    0.97
  -4   2   9    4.12    0.38
   4  -2   9    2.59    0.41
   4   2  -9    3.17    0.62
   4   2   9    2.60    0.54
  -4  -2   9    3.05    0.29
   4   2   9    3.01    0.16
  -4   2  -9    3.32    0.51
   4  -2  -9    3.20    0.48
  -4   2  10    5.19    0.49
   4  -2  10    4.95    0.52
   4   2 -10    5.44    0.74
   4   2  10    5.10    0.78
   4  -2 -10    5.29    0.58
  -4   2 -10    4.72    0.76
  -4  -2  10    4.70    0.39
  -4   2  11    0.95    0.28
   4  -2  11    0.76    0.35
   4   2 -11    1.00    0.51
   4  -2 -11    0.61    0.40
  -4   2 -11    1.12    0.56
   4   2  11    0.72    0.52
  -4  -2  11    0.61    0.25
  -4   2  12    3.35    0.49
   4   2 -12    4.36    0.82
   4  -2  12    5.10    0.57
  -4   2 -12    4.73    0.94
   4  -2 -12    4.85    0.63
   4   2  12    3.90    0.85
  -4  -2  12    4.69    0.48
  -4   2  13    4.30    0.53
   4  -2  13    4.72    0.60
   4   2 -13    4.72    0.88
  -4   2 -13    5.63    0.94
   4  -2 -13    4.16    0.62
  -4  -2  13    3.77    0.45
   4   2  13    4.72    0.93
   4   2 -14    0.02    0.56
   4  -2  14    0.80    0.38
  -4   2 -14    0.23    0.59
   4  -2 -14    0.81    0.37
   4   2  14   -0.09    0.57
  -4  -2  14    0.08    0.28
   4  -2  15   -0.11    0.33
   4   2 -15    0.66    0.54
  -4   2 -15    0.16    0.54
   4  -2 -15    0.12    0.35
   4   2  15    0.85    0.59
   4   2 -16    1.25    0.70
   4  -2  16    1.00    0.43
   4  -2 -16    1.49    0.51
   4   2  16    0.96    0.86
   4   2 -17    0.98    0.63
   4  -2  17   -0.24    0.79
   4   2 -18    1.01    0.77
   4  -2  18    0.41    0.95
   4   2  18    1.64    0.94
   4  -2  19   -0.27    0.77
   4   2  19    0.89    0.82
  -5   2   0   14.37    0.58
   5  -2   0   14.05    0.67
   5   2   0   14.80    0.50
   5  -2   1    8.18    0.53
   5   2  -1    8.42    0.54
  -5   2   1    8.70    0.42
   5   2  -1    8.43    0.30
   5  -2  -1    8.81    0.56
   5   2   1    8.65    0.42
   5   2   1    8.57    0.49
  -5   2  -1    8.60    0.51
  -5   2   2   11.37    0.45
   5  -2   2   11.31    0.61
   5   2  -2   10.99    0.66
   5   2  -2   10.98    0.28
   5   2   2   11.05    0.58
   5   2   2   11.76    0.51
   5  -2  -2   10.84    0.64
  -5   2  -2   10.74    0.61
   5   2  -3    3.87    0.09
   5  -2   3    4.27    0.41
  -5   2   3    4.43    0.26
   5   2  -3    4.76    0.50
  -5   2  -3    4.60    0.42
   5   2   3    4.16    0.40
   5   2   3    4.56    0.28
   5  -2  -3    4.45    0.44
  -5   2   4   32.56    0.93
   5  -2   4   33.15    1.25
   5   2  -4   33.02    1.48
   5   2   4   33.62    1.42
  -5   2  -4   31.42    1.33
   5  -2  -4   32.47    1.36
   5   2   4   33.88    0.93
   5   2  -5   25.94    1.37
   5  -2   5   25.36    1.11
  -5   2   5   27.14    0.83
   5   2   5   27.12    0.77
  -5   2  -5   25.86    1.30
   5  -2  -5   25.48    1.21
   5   2   5   25.92    1.32
   5  -2   6   16.03    0.85
   5   2  -6   14.64    1.08
   5  -2  -6   15.22    0.94
   5   2   6   13.87    1.05
  -5   2  -6   15.11    0.96
   5   2   6   15.85    0.50
   5  -2   7    2.88    0.43
  -5   2   7    2.91    0.31
   5   2  -7    2.93    0.58
   5   2   7    3.32    0.58
  -5   2  -7    2.56    0.55
   5   2   7    2.77    0.19
   5  -2  -7    2.56    0.52
  -5  -2   7    2.41    0.12
   5  -2   8    6.08    0.55
   5   2  -8    6.33    0.66
  -5   2   8    5.39    0.37
  -5  -2   8    4.89    0.24
  -5   2  -8    5.17    0.73
   5   2   8    5.51    0.77
   5   2   8    5.43    0.26
   5  -2  -8    5.76    0.65
   5   2  -9    1.03    0.54
  -5   2   9    1.96    0.26
   5  -2   9    1.49    0.37
   5   2   9    1.51    0.16
  -5   2  -9    1.37    0.54
   5   2   9    1.46    0.57
   5  -2  -9    1.43    0.43
  -5  -2   9    1.18    0.17
   5  -2  10    0.88    0.33
  -5   2  10    1.05    0.27
   5   2 -10    1.32    0.57
  -5  -2  10    1.21    0.20
   5   2  10    0.87    0.55
   5  -2 -10    1.27    0.46
  -5   2 -10    1.59    0.45
   5   2 -11    0.30    0.45
   5  -2  11   -0.03    0.30
  -5   2  11    0.43    0.23
  -5  -2  11    0.40    0.18
  -5   2 -11    0.16    0.49
   5  -2 -11    0.02    0.33
   5   2  11    0.24    0.46
   5  -2  12    1.34    0.42
   5   2 -12    2.83    0.71
  -5   2  12    2.28    0.36
   5  -2 -12    1.82    0.54
   5   2  12    1.91    0.73
  -5   2 -12    2.14    0.64
   5   2 -13    0.04    0.54
   5  -2  13    0.37    0.38
  -5   2  13    0.53    0.28
  -5   2 -13    0.91    0.59
   5  -2 -13    0.37    0.47
   5   2  13    0.80    0.58
  -5   2  14    1.23    0.40
   5   2 -14    1.79    0.72
   5  -2  14    1.47    0.44
   5  -2 -14    1.07    0.59
   5   2  14    1.54    0.76
  -5   2 -14    2.75    0.80
   5  -2  15    0.56    0.35
  -5   2  15    0.56    0.33
   5   2 -15    0.33    0.58
  -5   2 -15   -0.26    0.51
   5  -2 -15    0.16    0.43
   5   2  15    0.92    0.62
   5   2 -16    0.05    0.78
  -5   2 -16    2.33    0.79
   5  -2 -16    1.02    0.50
   5   2  16    0.19    0.81
   5  -2  17    1.10    0.70
   5   2 -17   -0.20    0.64
   5   2  17   -0.25    0.70
   5  -2  18    0.45    0.91
   5   2 -18    0.43    0.75
   5   2  18    1.34    0.92
   5  -2  19    0.97    1.09
   5   2  19    1.65    1.06
   6   2   0   19.00    0.91
   6  -2   0   18.52    0.94
   6   2   0   19.46    0.68
  -6   2   0   20.00    0.80
   6  -2   1    1.85    0.34
  -6   2   1    1.38    0.21
   6   2  -1    1.35    0.34
   6   2  -1    1.67    0.17
   6   2   1    1.56    0.21
   6   2   1    1.25    0.31
   6  -2  -1    1.60    0.35
  -6   2  -1    1.15    0.29
   6  -2   2    1.33    0.32
   6   2  -2    0.97    0.33
  -6   2   2    1.20    0.18
   6   2  -2    1.00    0.10
   6   2   2    1.21    0.23
  -6   2  -2    1.10    0.29
   6   2   2    1.26    0.25
   6  -2  -2    1.52    0.33
   6  -2   3    6.95    0.56
   6   2  -3    6.30    0.14
  -6   2   3    6.85    0.38
   6   2  -3    6.55    0.63
   6   2   3    6.59    0.56
  -6   2  -3    5.95    0.48
   6  -2  -3    7.03    0.60
   6   2   3    6.95    0.41
  -6   2   4    2.07    0.24
   6   2  -4    1.91    0.47
   6  -2   4    1.68    0.38
   6   2   4    1.82    0.24
   6   2   4    1.84    0.41
  -6   2  -4    2.26    0.43
   6  -2  -4    2.23    0.36
   6  -2   5   10.55    0.73
  -6   2   5   11.13    0.48
   6   2  -5   10.36    0.90
   6   2   5   10.50    0.48
  -6   2  -5   10.93    0.88
   6   2   5   10.92    0.87
   6  -2  -5   11.00    0.77
   6   2  -6   16.61    1.15
  -6   2   6   15.94    0.62
   6  -2   6   15.99    0.88
  -6   2  -6   16.24    1.14
   6   2   6   15.59    1.12
   6   2   6   14.97    0.60
   6  -2  -6   15.45    1.03
   6  -2   7    0.97    0.28
  -6   2   7    0.78    0.20
   6   2  -7    0.60    0.37
   6   2   7    0.67    0.17
   6   2   7    0.22    0.44
  -6   2  -7    0.79    0.43
   6  -2  -7    0.57    0.43
   6   2  -8    2.07    0.60
  -6   2   8    2.19    0.23
   6  -2   8    2.21    0.38
   6  -2  -8    1.93    0.51
   6   2   8    2.29    0.61
   6   2   8    1.78    0.21
  -6   2  -8    2.02    0.58
   6   2  -9    7.64    0.94
   6  -2   9    7.38    0.66
  -6   2   9    6.96    0.45
   6   2   9    6.52    0.93
   6  -2  -9    7.12    0.79
   6   2   9    6.31    0.34
  -6   2  -9    7.64    0.91
   6   2 -10    5.75    0.90
   6  -2  10    5.56    0.56
   6  -2 -10    5.41    0.76
  -6   2 -10    5.17    0.86
   6   2  10    6.01    0.92
   6   2 -11    1.62    0.59
  -6   2  11    0.68    0.25
   6  -2  11    1.06    0.35
  -6   2 -11    0.97    0.62
   6  -2 -11    0.38    0.51
   6   2  11    0.94    0.60
   6   2 -12    0.90    0.60
   6  -2  12    0.91    0.37
  -6   2  12    0.86    0.27
   6   2  12    0.60    0.63
   6  -2 -12    0.81    0.55
  -6   2 -12    0.62    0.55
  -6   2  13    0.57    0.30
   6   2 -13    0.80    0.66
   6  -2  13    1.14    0.39
  -6   2 -13    1.86    0.70
   6   2  13    0.78    0.69
   6  -2 -13    1.90    0.57
   6   2 -14    1.23    0.72
   6  -2  14    1.06    0.43
   6   2  14    0.65    0.73
   6  -2 -14    1.23    0.58
  -6   2 -14    0.34    0.74
   6   2 -15    0.29    0.59
   6  -2  15    0.54    0.37
   6   2  15    0.69    0.65
  -6   2 -15   -0.44    0.64
   6  -2 -15    0.15    0.47
   6   2 -16    2.08    0.82
   6   2  16    0.31    0.90
  -6   2 -16    0.39    0.85
   6  -2 -16    1.65    0.67
   6   2 -17    2.52    1.04
   6   2  17    1.98    1.10
   6  -2  18    0.73    0.72
   6   2 -18   -0.47    0.66
   7   2   0    6.93    0.62
   7   2   0    6.36    0.38
   7  -2   0    7.14    0.57
  -7   2   0    6.65    0.46
   7  -2   1    1.17    0.31
  -7   2   1    1.29    0.27
   7   2  -1    1.56    0.37
   7   2  -1    1.21    0.18
   7   2   1    1.09    0.22
   7   2   1    1.28    0.35
   7  -2  -1    1.09    0.36
  -7   2  -1    1.14    0.30
   7   2  -2    8.32    0.31
   7   2  -2    8.78    0.67
   7  -2   2    9.50    0.72
  -7   2   2    9.45    0.47
   7   2   2    9.29    0.59
   7   2   2    9.11    0.62
   7  -2  -2    8.73    0.73
  -7   2  -2    8.93    0.65
   7  -2   3   13.18    0.86
  -7   2   3   13.66    0.56
   7   2  -3   13.54    0.95
   7   2  -3   13.05    0.28
   7  -2  -3   13.86    0.95
   7   2   3   15.11    0.74
   7   2   3   13.84    0.85
  -7   2  -3   13.76    0.91
  -7   2   4    6.72    0.40
   7  -2   4    7.51    0.65
   7   2  -4    6.97    0.80
   7   2   4    7.43    0.64
   7   2   4    6.99    0.50
  -7   2  -4    6.95    0.70
   7  -2  -4    6.50    0.74
   7   2  -5   27.75    1.66
   7  -2   5   28.02    1.29
  -7   2   5   28.72    0.92
  -7   2  -5   28.82    1.56
   7   2   5   28.03    1.05
   7   2   5   29.35    1.57
   7  -2  -5   28.89    1.58
   7  -2   6    3.03    0.50
  -7   2   6    3.11    0.27
   7   2  -6    2.69    0.56
   7  -2  -6    3.42    0.59
   7   2   6    3.21    0.31
   7   2   6    3.29    0.64
  -7   2  -6    2.96    0.53
  -7   2   7    1.53    0.21
   7  -2   7    1.78    0.37
   7   2  -7    1.56    0.57
  -7   2  -7    1.53    0.54
   7   2   7    1.16    0.25
   7  -2  -7    2.18    0.54
   7   2   7    1.79    0.56
   7   2  -8    8.03    0.97
   7  -2   8    7.20    0.65
  -7   2   8    7.01    0.43
   7  -2  -8    8.51    0.94
   7   2   8    6.94    0.44
   7   2   8    8.04    0.95
  -7   2  -8    7.78    0.94
   7  -2   9    1.08    0.34
   7   2  -9    0.82    0.57
  -7   2   9    0.92    0.23
   7  -2  -9    1.09    0.49
   7   2   9    0.84    0.20
   7   2   9    1.81    0.60
  -7   2  -9    0.58    0.53
   7  -2  10    0.80    0.35
  -7   2  10    0.38    0.21
   7   2 -10    0.79    0.53
   7   2  10    0.59    0.55
  -7   2 -10    0.71    0.44
   7  -2 -10    0.59    0.46
   7  -2  11    2.51    0.52
   7   2 -11    1.91    0.79
  -7   2  11    2.07    0.34
   7  -2 -11    3.33    0.70
   7   2  11    3.10    0.83
  -7   2 -11    3.02    0.83
   7  -2  12   -0.21    0.27
   7   2 -12    0.23    0.47
  -7   2 -12   -0.31    0.52
   7   2  12    0.18    0.47
   7  -2 -12    0.97    0.43
   7  -2  13    0.31    0.38
   7   2 -13   -0.06    0.58
   7   2  13    1.07    0.59
  -7   2 -13    0.06    0.61
   7  -2 -13    0.31    0.51
   7  -2  14    0.68    0.42
   7   2 -14   -0.19    0.65
   7  -2 -14   -0.12    0.63
   7   2  14    0.54    0.66
  -7   2 -14    1.41    0.67
   7   2 -15    0.58    0.69
   7   2  15    1.06    0.71
   7  -2 -15   -0.12    0.53
  -7   2 -15    0.69    0.71
   7   2 -16   -0.04    0.69
   7   2  16    0.66    0.69
  -7   2 -16    0.27    0.70
   7   2 -17    0.59    0.75
  -7   2 -17   -0.03    0.42
   7   2  17    1.30    0.81
   7   2 -18    0.47    0.91
   7   2  18    0.52    0.93
   8   2   0    1.44    0.40
   8   2   0    0.83    0.24
   8  -2   0    0.96    0.39
  -8   2   0    0.88    0.25
   8   2  -1    4.19    0.32
   8   2  -1    3.99    0.58
  -8   2   1    3.79    0.37
   8  -2   1    4.37    0.58
   8  -2  -1    3.73    0.58
   8   2   1    4.08    0.51
  -8   2  -1    4.70    0.47
   8   2  -2    5.41    0.27
   8  -2   2    6.56    0.66
   8   2  -2    6.60    0.71
  -8   2   2    6.55    0.43
   8  -2  -2    5.84    0.69
   8   2   2    6.20    0.58
  -8   2  -2    6.48    0.61
   8   2   2    6.40    0.57
   8  -2   3    3.54    0.54
  -8   2   3    3.52    0.32
   8   2  -3    3.02    0.59
   8   2   3    3.09    0.41
   8   2   3    3.48    0.52
   8  -2  -3    2.68    0.59
  -8   2  -3    3.57    0.53
   8   2  -4    3.50    0.56
   8  -2   4    3.95    0.56
  -8   2   4    3.15    0.32
  -8   2  -4    4.66    0.62
   8   2   4    3.68    0.59
   8  -2  -4    3.79    0.64
   8   2   4    3.87    0.45
  -8   2   5    4.52    0.34
   8   2  -5    4.20    0.78
   8  -2   5    5.58    0.62
   8   2   5    5.68    0.46
   8  -2  -5    5.34    0.75
   8   2   5    4.29    0.71
  -8   2  -5    4.85    0.75
  -8   2   6    0.85    0.19
   8  -2   6    1.12    0.35
   8   2  -6    1.19    0.53
  -8   2  -6    1.25    0.49
   8  -2  -6    1.45    0.40
   8   2   6    1.29    0.49
   8   2   6    1.05    0.26
  -8   2   7    5.29    0.35
   8  -2   7    5.06    0.65
   8   2  -7    5.92    0.88
   8   2   7    5.47    0.88
   8   2   7    5.34    0.44
  -8   2  -7    5.17    0.70
   8  -2  -7    6.59    0.87
   8   2  -8   -0.18    0.52
  -8   2   8    0.70    0.17
   8  -2   8    0.19    0.33
   8   2   8    0.18    0.54
  -8   2  -8    0.39    0.51
   8   2   8    0.71    0.25
   8  -2  -8    1.52    0.52
   8   2  -9    6.65    1.04
   8  -2   9    6.86    0.75
   8   2   9    7.03    1.05
   8  -2  -9    6.37    0.91
   8   2   9    6.12    0.48
  -8   2  -9    7.42    1.02
   8  -2  10    1.32    0.42
   8   2 -10    1.50    0.71
   8  -2 -10    1.70    0.61
  -8   2 -10    1.15    0.73
   8   2  10    1.81    0.61
   8  -2  11   -0.07    0.31
   8   2 -11    0.00    0.51
  -8   2 -11    0.45    0.57
   8  -2 -11    1.17    0.49
   8   2  11    0.27    0.55
   8  -2  12    0.63    0.39
   8   2 -12    0.20    0.66
   8   2  12    1.24    0.70
   8  -2 -12    1.39    0.56
  -8   2 -12    0.38    0.58
   8  -2  13    0.60    0.38
   8   2 -13    0.31    0.70
   8   2  13   -0.23    0.56
  -8   2 -13    0.43    0.57
   8  -2 -13    2.18    0.63
   8  -2  14    0.23    0.41
   8   2 -14    1.15    0.71
   8   2  14    0.90    0.71
  -8   2 -14    1.20    0.60
   8  -2 -14    0.32    0.56
   8  -2 -14    0.33    0.56
   8   2 -15    1.86    0.83
  -8   2 -15    1.37    0.77
   8  -2 -15    0.57    0.76
   8   2  15    0.10    0.83
   8   2 -16    1.06    0.87
   8  -2 -16    0.66    0.69
   8   2  16    1.56    0.90
   8   2 -17    0.10    0.70
  -9   2   0    0.40    0.25
   9   2   0    0.27    0.36
   9   2   0    0.34    0.18
   9  -2   0   -0.16    0.35
   9  -2   1    0.11    0.31
   9   2  -1    0.01    0.16
  -9   2   1    0.20    0.20
   9   2  -1    0.12    0.33
   9   2   1   -0.26    0.31
  -9   2  -1    0.70    0.26
   9  -2  -1    0.24    0.33
  -9   2   2    5.49    0.42
   9  -2   2    5.15    0.70
   9   2  -2    5.25    0.73
   9   2  -2    4.72    0.29
   9   2   2    5.35    0.53
  -9   2  -2    4.89    0.57
   9   2   2    5.36    0.57
   9  -2  -2    5.51    0.73
   9   2  -3    1.28    0.52
  -9   2   3    1.42    0.24
   9  -2   3    0.85    0.47
   9   2   3    1.40    0.36
   9  -2  -3    1.48    0.52
   9   2   3    1.22    0.44
  -9   2  -3    1.24    0.46
   9   2  -4    1.26    0.52
   9  -2   4    1.83    0.46
  -9   2   4    0.83    0.22
   9   2   4    1.35    0.34
   9  -2  -4    2.40    0.55
   9   2   4    0.87    0.41
  -9   2  -4    1.02    0.50
  -9   2   5    3.23    0.33
   9  -2   5    3.67    0.62
   9   2  -5    3.25    0.76
   9   2   5    3.32    0.68
  -9   2  -5    3.03    0.67
   9  -2  -5    3.77    0.60
   9   2   5    3.16    0.43
   9  -2   6    1.10    0.44
   9   2  -6    1.48    0.45
  -9   2   6    0.49    0.19
   9  -2  -6    1.19    0.51
  -9   2  -6    1.59    0.50
   9   2   6    0.51    0.51
   9   2   6    0.52    0.28
   9   2  -7    0.68    0.47
   9  -2   7   -0.02    0.33
   9   2   7    1.01    0.44
   9  -2  -7    0.68    0.46
   9   2   7   -0.10    0.22
  -9   2  -7   -0.21    0.43
   9  -2   8    0.37    0.37
   9   2  -8    1.11    0.52
   9   2   8    0.07    0.51
   9   2   8    0.12    0.22
   9  -2  -8    0.46    0.50
  -9   2  -8    0.57    0.50
   9  -2   9    0.84    0.35
   9   2  -9   -0.10    0.58
   9  -2  -9    0.91    0.53
   9   2   9    1.39    0.58
   9   2   9    0.25    0.23
  -9   2  -9   -0.12    0.55
   9   2 -10    0.34    0.68
   9  -2  10    0.98    0.44
   9  -2 -10    0.93    0.58
  -9   2 -10    0.49    0.67
   9   2  10    0.77    0.65
   9   2 -11    4.73    0.76
   9  -2  11   -0.24    0.48
  -9   2 -11    0.41    0.73
   9   2  11    1.09    0.61
   9   2 -12   -0.17    0.53
   9   2  12    0.22    0.56
  -9   2 -12    0.31    0.55
   9  -2  13   -0.01    0.41
   9   2 -13    0.41    0.66
  -9   2 -13   -0.21    0.63
   9  -2 -13    0.08    0.56
   9   2  13    0.89    0.51
   9   2 -14    0.03    0.73
  -9   2 -14    2.08    0.72
   9   2  14   -0.38    0.60
   9  -2 -14    0.53    0.64
   9   2 -15   -0.01    0.77
   9   2  15    1.48    0.80
   9  -2 -15    0.33    0.70
   9   2 -16    0.32    0.91
   9   2  16   -0.29    0.93
   9  -2 -16    0.41    0.75
  -9   2 -16    3.27    0.90
   9   2 -17    1.19    0.75
   9  -2  17   -0.38    0.74
  10   2   0    0.91    0.51
  10  -2   0    0.53    0.48
 -10   2   0    1.03    0.32
  10   2   0    0.98    0.25
  10   2  -1    4.61    0.71
 -10   2   1    3.66    0.43
  10  -2   1    3.53    0.66
  10   2  -1    3.81    0.32
  10   2   1    1.96    0.37
  10  -2  -1    3.53    0.68
 -10   2  -1    3.64    0.50
  10   2   1    4.48    0.70
 -10   2   2    0.06    0.18
  10  -2   2   -0.15    0.36
  10   2  -2    0.07    0.13
 -10   2  -2    0.20    0.28
  10   2   2    0.83    0.28
  10   2   2    0.14    0.33
 -10   2   3   10.81    0.67
  10  -2   3   11.16    1.04
  10   2  -3   11.45    1.13
  10   2   3   11.28    0.97
 -10   2  -3   11.85    1.06
  10  -2  -3   11.84    1.18
  10   2   3   11.68    0.91
 -10   2   4    0.98    0.25
  10  -2   4    0.92    0.50
  10   2  -4    1.05    0.56
  10  -2  -4    1.21    0.47
 -10   2  -4    0.98    0.50
  10   2   4    0.79    0.42
  10   2   4    0.83    0.50
 -10   2   5    1.37    0.28
  10  -2   5    2.55    0.54
  10   2  -5    1.37    0.55
  10  -2  -5    1.75    0.55
  10   2   5    1.89    0.59
 -10   2  -5    1.51    0.61
  10   2   5    1.63    0.46
  10  -2   6    0.99    0.50
  10   2  -6    1.64    0.64
  10   2   6    0.82    0.59
  10  -2  -6    0.97    0.61
 -10   2  -6    1.09    0.56
  10   2   6    0.99    0.35
  10   2  -7    2.49    0.80
  10  -2   7    2.38    0.63
  10   2   7    2.04    0.42
  10  -2  -7    2.57    0.83
 -10   2  -7    3.44    0.74
  10   2   7    2.12    0.77
  10  -2   8    1.29    0.50
  10   2  -8    0.97    0.70
  10  -2  -8    0.98    0.69
 -10   2  -8    0.38    0.64
  10   2   8    1.38    0.68
  10   2   8    0.83    0.32
  10   2  -9    2.13    0.83
  10  -2   9    2.11    0.55
  10  -2  -9    2.75    0.81
  10   2   9    3.21    0.84
  10   2   9    1.66    0.38
 -10   2  -9    3.19    0.90
  10  -2  10   -0.18    0.35
  10   2 -10    1.18    0.59
  10  -2 -10    0.04    0.53
 -10   2 -10    0.58    0.60
  10   2  10    0.30    0.60
  10  -2  11    0.12    0.38
  10   2 -11    0.24    0.56
  10  -2 -11    1.57    0.60
 -10   2 -11    0.39    0.70
  10   2  11    0.55    0.70
  10  -2  12    1.56    0.50
  10   2 -12   -0.21    0.72
  10  -2 -12    2.22    0.73
  10   2  12    0.32    0.80
 -10   2 -12   -0.37    0.78
  10   2 -13    0.55    0.79
 -10   2 -13    1.71    0.82
  10   2  13    0.37    0.80
  10   2 -14   -0.27    0.67
  10  -2 -14   -0.28    0.63
  10   2  14    0.06    0.65
  10   2 -15    0.40    0.90
  10  -2 -15    0.26    0.87
 -10   2 -15    1.04    0.87
  10   2  15    1.49    0.90
  10   2 -16   -0.61    0.67
 -10   2 -16   -0.23    0.52
  10  -2 -16    0.39    0.55
  10   2  16    0.15    0.67
  11  -2   0    0.03    0.49
 -11   2   0    0.65    0.32
  11   2   0    0.95    0.51
  11   2   0    0.46    0.24
  11   2  -1    0.64    0.29
 -11   2   1    1.62    0.36
  11   2  -1    1.64    0.59
  11  -2   1    1.24    0.57
  11   2   1    1.12    0.33
  11  -2  -1    1.15    0.61
  11   2   1    2.06    0.56
 -11   2  -1    1.15    0.46
  11  -2   2    2.03    0.58
  11   2  -2    1.97    0.66
 -11   2   2    1.56    0.37
 -11   2  -2    1.30    0.51
  11   2   2    1.88    0.60
  11   2   2    1.36    0.47
  11  -2  -2    1.19    0.65
 -11   2   3    0.47    0.28
  11   2  -3    0.70    0.50
  11  -2   3    0.36    0.43
  11  -2  -3    0.59    0.51
 -11   2  -3   -0.02    0.36
  11   2   3    0.35    0.39
  11   2   3   -0.05    0.39
 -11   2   4    1.51    0.34
  11  -2   4    0.74    0.61
  11   2  -4    2.26    0.68
  11  -2  -4    1.18    0.68
  11   2   4    2.41    0.57
 -11   2  -4    1.61    0.61
  11   2   4    1.65    0.55
  11   2  -5    2.52    0.76
  11  -2   5    2.37    0.63
 -11   2  -5    1.24    0.66
  11   2   5    1.77    0.68
  11  -2  -5    2.24    0.78
  11   2   5    2.08    0.55
  11   2  -6    2.22    0.85
  11  -2   6    2.51    0.68
  11   2   6    2.63    0.51
 -11   2  -6    3.05    0.77
  11  -2  -6    2.41    0.69
  11   2   6    3.17    0.80
  11  -2   7    0.25    0.42
  11   2   7    0.19    0.59
  11  -2  -7    0.53    0.54
  11   2   7    0.61    0.34
 -11   2  -7    0.53    0.58
  11   2  -8    2.43    0.83
  11  -2   8    2.48    0.61
  11   2   8    2.15    0.81
  11  -2  -8    1.96    0.88
 -11   2  -8    1.99    0.86
  11   2   8    1.31    0.44
  11  -2   9   -0.06    0.45
 -11   2  -9    0.38    0.64
  11   2   9    0.98    0.64
  11  -2  -9    0.43    0.60
  11  -2  10    0.00    0.49
  11   2 -10   -0.45    0.65
  11   2  10    0.77    0.70
  11  -2 -10    1.71    0.65
  11   2 -11    0.04    0.69
  11   2  11   -0.18    0.70
 -11   2 -11    1.35    0.65
 -11   2 -11   -0.06    0.53
  11   2 -12    0.19    0.77
  11  -2  12    1.41    0.57
 -11   2 -12    0.25    0.80
  11   2  12    0.54    0.81
  11   2 -13    0.06    0.59
  11   2  13   -0.50    0.62
 -11   2 -13    0.21    0.63
  11   2 -14    0.50    0.83
 -11   2 -14    1.39    0.84
  11   2  14   -0.12    0.83
  11   2 -15   -0.37    0.78
  11  -2 -15   -0.01    0.67
  11  -2 -15    1.09    0.77
 -11   2 -15   -0.09    0.80
  11   2  15    0.85    0.81
  12  -2   0    1.79    0.61
 -12   2   0    0.62    0.42
  12   2   0    0.95    0.60
  12   2   0    1.08    0.31
  12  -2   1    2.42    0.70
  12   2  -1    2.56    0.75
 -12   2   1    1.71    0.46
  12   2   1    1.67    0.40
  12  -2  -1    2.34    0.76
 -12   2  -1    2.19    0.55
  12   2   1    3.30    0.74
  12   2  -2    0.50    0.59
 -12   2   2    1.45    0.37
  12  -2   2    0.78    0.54
 -12   2  -2    0.10    0.45
  12   2   2    0.47    0.35
  12   2   2    0.20    0.49
  12  -2  -2    0.54    0.60
  12  -2   3    3.80    0.76
  12   2  -3    2.72    0.89
  12   2   3    3.30    0.69
  12   2   3    3.86    0.80
  12  -2  -3    3.20    0.87
 -12   2  -3    2.60    0.64
  12   2  -4   -0.35    0.44
  12   2   4    0.29    0.32
  12   2   4   -0.30    0.30
  12  -2  -4    0.02    0.44
 -12   2  -4    0.13    0.37
  12   2  -5    1.31    0.70
  12  -2   5    1.67    0.53
 -12   2  -5    0.48    0.54
  12   2   5    1.37    0.63
  12   2   5    0.86    0.47
  12  -2  -5    1.21    0.73
  12  -2   6    4.82    0.88
  12   2  -6    6.31    1.15
 -12   2  -6    5.19    0.98
  12   2   6    4.78    0.73
  12   2   6    5.19    1.02
  12  -2  -6    4.29    1.18
  12   2  -7    0.90    0.67
  12  -2   7    0.46    0.45
  12   2   7   -0.34    0.63
 -12   2  -7    0.78    0.66
  12   2   7    0.63    0.39
  12  -2  -7    0.75    0.72
  12  -2   8    1.59    0.58
 -12   2  -8    1.43    0.76
  12   2   8    0.58    0.41
  12   2   8    0.30    0.74
  12  -2  -8    0.26    0.74
  12   2  -9    2.21    0.91
  12  -2   9    1.20    0.69
  12   2   9    1.37    0.92
  12  -2  -9    2.31    0.86
  12   2 -10   -0.42    0.76
  12  -2  10    1.24    0.49
 -12   2 -10    0.80    0.77
  12  -2 -10    0.22    0.73
  12   2 -11    1.15    0.89
  12  -2  11    1.61    0.62
  12   2  11    0.44    0.93
  12  -2 -11    1.05    0.84
  12   2 -12    0.22    0.85
 -12   2 -12    0.08    0.81
  12  -2 -12    1.73    0.85
  12   2 -13   -0.01    0.68
  12   2  13    1.65    0.91
  12  -2 -13    1.47    0.89
  12   2 -14    0.65    0.91
  12   2  14    0.36    0.93
 -12   2 -14    1.06    0.94
  13  -2   0    1.05    0.63
  13   2   0   -0.23    0.61
 -13   2   0    0.81    0.41
 -13   2   1    0.18    0.29
  13  -2   1   -0.19    0.49
  13   2  -1    1.14    0.49
  13   2   1   -0.19    0.26
  13  -2   2   -0.38    0.55
  13   2  -2    1.17    0.63
  13  -2  -2    0.63    0.61
  13   2   2    0.26    0.40
 -13   2  -2    1.19    0.51
  13   2   2   -0.07    0.58
  13   2  -3    0.41    0.66
  13  -2   3    0.21    0.60
  13   2   3    1.46    0.53
 -13   2  -3    0.50    0.46
  13  -2  -3    0.36    0.55
  13   2   3    0.66    0.44
  13   2  -4   -0.37    0.64
  13   2   4    0.09    0.50
 -13   2  -4    0.04    0.55
  13   2   4    1.52    0.53
  13  -2  -4    1.13    0.65
  13   2  -5    1.24    0.69
  13  -2   5    1.81    0.67
  13   2   5    0.98    0.54
  13  -2  -5    1.49    0.78
  13   2   5    1.17    0.61
 -13   2  -5    1.68    0.77
  13  -2   6    0.80    0.54
  13   2  -6   -0.48    0.72
  13   2   6   -0.03    0.62
  13  -2  -6    0.93    0.73
 -13   2  -6    0.76    0.65
  13   2  -7    0.49    0.81
  13  -2   7    1.51    0.63
 -13   2  -7    0.43    0.79
  13   2   7    0.58    0.74
  13  -2  -7    0.71    0.83
  13   2   7    1.08    0.55
  13   2  -8    1.70    0.82
  13   2   8    0.31    0.69
  13  -2  -8    0.85    0.82
  13  -2   9    1.18    0.65
  13  -2  -9    0.28    0.87
 -13   2  -9    1.46    0.83
  13   2   9    1.03    0.86
  13   2 -10   -0.17    0.52
  13  -2 -10   -0.13    0.67
  13   2  10   -0.36    0.71
  13  -2 -11    1.33    0.89
  13   2  11    0.00    0.92
 -13   2 -11    1.51    0.93
  13   2 -12    0.14    0.80
  13  -2 -12    1.86    0.86
 -13   2 -12   -0.56    0.81
  13   2 -13    0.11    0.86
 -13   2 -13    0.16    0.93
  13  -2 -13    1.94    0.96
  14   2   0    1.04    0.80
 -14   2   0    0.60    0.50
  14  -2   0    3.68    0.80
  14   2  -1    0.03    0.70
  14  -2   1    1.42    0.68
  14   2   1    1.13    0.58
 -14   2  -1   -0.35    0.55
  14  -2  -1    1.76    0.73
  14   2  -2   -0.13    0.67
  14  -2  -2    1.16    0.66
  14   2   2   -0.02    0.65
 -14   2  -2    0.70    0.52
  14   2  -3    1.05    0.56
  14  -2   3    1.10    0.61
 -14   2  -3   -0.31    0.57
  14   2   3    0.22    0.44
  14   2   3    0.02    0.64
  14  -2  -3    1.17    0.67
  14   2  -4    1.95    0.81
  14   2   4    0.48    0.58
  14   2   4    2.29    0.74
 -14   2  -4    0.01    0.73
  14  -2  -4    2.59    0.81
  14  -2   5    1.02    0.56
  14   2  -5    0.27    0.68
 -14   2  -5    0.11    0.52
  14   2   5   -0.21    0.53
  14  -2  -5   -0.11    0.68
  14   2  -6   -0.48    0.87
  14  -2   6    0.69    0.59
  14   2   6    0.77    0.74
  14   2   6    2.03    0.59
 -14   2  -6    1.67    0.70
  14  -2  -6    0.21    0.88
  14   2  -7    1.30    0.70
  14  -2   7   -0.26    0.50
 -14   2  -7    0.18    0.67
  14   2   7    0.41    0.67
  14   2  -8    0.98    0.70
  14  -2   8    1.65    0.60
  14  -2  -8    0.37    0.85
 -14   2  -8   -0.01    0.80
  14   2   8    0.08    0.84
  14   2  -9    1.50    0.73
  14  -2   9    1.07    0.68
  14   2   9    0.31    0.85
  14  -2  -9   -0.54    0.90
  14   2 -10    0.74    0.85
 -14   2 -10    2.75    0.99
  14  -2 -10    0.40    0.96
  14   2 -11   -0.24    1.05
 -14   2 -11    2.56    1.03
  14  -2 -11    2.72    1.08
  15   2   0    1.77    0.89
  15   2  -1    0.67    0.64
  15  -2   1    0.85    0.60
  15   2   1   -0.40    0.60
  15  -2  -1   -0.44    0.62
  15   2  -2    1.58    0.86
  15  -2   2    1.22    0.85
  15  -2  -2    1.96    0.87
 -15   2  -2    1.22    0.78
  15  -2   3    1.12    0.85
  15   2  -3    1.44    0.94
  15  -2  -3    2.57    0.90
 -15   2  -3    1.18    0.73
  15   2   3    1.86    0.82
  15   2  -4    1.01    0.92
  15   2   4    2.61    0.85
 -15   2  -4    1.83    0.90
  15  -2  -4    0.38    0.91
  15  -2   5    1.44    0.68
  15   2  -5    0.19    0.81
 -15   2  -5   -0.06    0.78
  15  -2  -5    0.06    0.83
  15   2  -6    0.22    0.82
  15  -2  -6    0.59    0.83
 -15   2  -6   -0.46    0.73
  15   2   6    1.05    0.61
  15   2  -7    1.12    1.18
  15  -2   7    1.47    0.96
  15  -2  -7    2.20    1.13
 -15   2  -7    6.72    1.09
  15   2   8    1.15    0.81
  15  -2  -8   -0.15    0.87
  15   2  -9    0.52    0.60
  15   2   9   -0.30    0.52
  15  -2  -9   -0.09    0.57
  16  -2   1    1.44    0.90
  16   2  -1    1.57    0.91
  16  -2  -1   -0.33    0.91
  16   2   1    2.09    0.91
  16   2  -2    1.47    0.93
  16  -2   2    2.02    0.86
  16  -2  -2    1.58    0.93
  16   2   2   -0.17    0.88
  16  -2   3   -0.36    0.91
  16   2  -3    2.41    0.96
  16   2   3    1.45    0.76
  16  -2   4    2.59    0.84
  16   2  -4   -0.01    0.95
  16   2   4   -0.08    0.70
  16   2  -5    2.75    1.21
  16  -2  -5    2.31    1.18
  16   2  -6    0.21    0.91
  16  -2  -6    0.86    0.87
  16  -2   7    1.23    0.92
  16   2  -7    1.66    1.04
 -16   2  -7    1.83    0.97
  16  -2  -7   -0.48    1.00
  17   2   0    0.78    0.91
  17   2  -1    1.01    1.03
  17  -2   1    1.81    0.93
  17  -2  -1    0.72    1.01
  17   2  -2    0.09    0.60
  17  -2  -2    0.32    0.58
  17   2   2   -0.44    0.59
   0   3   0   -0.01    0.12
   0  -3   0    0.10    0.09
   0  -3  -1   78.15    1.45
   0   3   1   85.53    1.79
   0   3  -1   81.98    1.70
   0   3  -1   86.49    1.85
   0   3  -2    0.01    0.12
   0   3  -2   -0.03    0.10
   0   3   2   -0.08    0.12
   0   3   3    9.36    0.48
   0   3  -3    9.12    0.47
   0   3  -3    9.14    0.39
   0  -3  -3    9.13    0.26
   0   3  -4    0.04    0.12
   0  -3  -4    0.03    0.05
   0   3   4    0.24    0.13
   0   3  -4    0.19    0.15
   0   3   5    2.83    0.35
   0  -3  -5    2.61    0.13
   0   3  -5    3.11    0.37
   0   3  -5    2.76    0.29
   0   3  -6    0.38    0.17
   0   3  -6    0.06    0.21
   0  -3  -6    0.02    0.08
   0   3   7    6.24    0.57
   0  -3  -7    6.50    0.28
   0   3  -7    6.72    0.53
   0   3  -7    7.19    0.60
   0   3  -8    0.24    0.21
   0   3  -8   -0.06    0.24
   0   3   8    0.14    0.23
   0  -3  -8   -0.01    0.08
   0   3  -9   12.46    0.92
   0   3   9   11.51    0.91
   0  -3  -9   12.06    0.47
   0   3  -9   12.01    0.78
   0   3 -10   -0.14    0.33
   0   3 -10    0.00    0.30
   0   3  10    0.45    0.33
   0  -3 -10    0.34    0.14
   0   3 -11    2.61    0.57
   0  -3 -11    2.59    0.29
   0   3 -11    2.90    0.50
   0   3  11    3.07    0.59
   0   3 -12   -0.19    0.37
   0  -3 -12    0.25    0.16
   0   3  12   -0.25    0.36
   0   3 -12    0.04    0.35
   0   3 -13    0.91    0.55
   0   3  13    1.68    0.58
   0   3 -13    1.20    0.51
   0   3  14   -0.12    0.42
   0   3 -14   -0.04    0.41
   0   3 -15    0.61    0.53
   0   3  15    1.78    0.64
   0   3 -16    0.74    0.46
   0   3 -16    0.18    0.55
   0   3  16    0.48    0.49
   0   3  17   -0.05    0.49
   0  -3  17    0.24    0.47
   0   3  18   -0.18    0.47
   0  -3  18    0.16    0.48
   1   3   0  120.05    2.22
   1   3   0  122.51    2.34
   1  -3   0  121.26    2.31
  -1   3   0  121.37    2.42
   1   3  -1   24.09    0.68
   1   3  -1   22.52    0.72
  -1   3   1   23.23    0.74
   1  -3   1   23.99    0.76
   1   3   1   24.07    0.75
   1   3   1   24.06    0.59
  -1   3  -1   22.33    0.73
   1  -3  -1   23.91    0.66
   1   3  -2   62.40    1.63
   1   3  -2   60.71    1.27
  -1  -3  -2   60.43    0.99
  -1   3   2   60.75    1.48
   1  -3   2   58.62    1.49
   1   3   2   61.23    1.54
   1  -3  -2   61.04    1.21
  -1   3  -2   60.43    1.48
   1   3  -3  103.95    2.57
   1   3  -3  100.85    1.99
  -1  -3  -3  101.22    1.23
  -1   3   3   99.78    2.29
   1  -3   3   97.80    2.27
   1   3   3  108.65    2.56
  -1   3  -3  100.14    2.28
   1   3  -4    2.08    0.32
  -1  -3  -4    1.96    0.07
  -1  -3  -4    2.02    0.07
   1   3  -4    2.07    0.20
  -1   3   4    2.53    0.27
   1   3   4    2.58    0.29
   1  -3  -4    2.10    0.15
   1   3  -5    8.24    0.40
  -1   3   5    8.31    0.50
   1   3  -5    8.64    0.59
   1  -3  -5    8.18    0.33
   1   3   5    8.03    0.52
  -1   3  -5    8.64    0.54
  -1   3  -5    8.18    0.50
  -1  -3  -6    1.61    0.07
   1   3  -6    1.92    0.37
   1   3  -6    2.12    0.25
  -1   3   6    1.55    0.33
   1   3   6    2.05    0.36
  -1   3  -6    2.22    0.33
   1  -3  -6    1.63    0.19
  -1   3  -6    1.88    0.31
  -1  -3  -7   30.97    0.52
  -1   3   7   31.20    1.34
   1   3  -7   30.64    1.16
   1   3  -7   30.34    1.40
   1   3   7   30.60    1.39
   1  -3  -7   29.52    0.86
  -1   3  -7   30.11    1.30
  -1   3  -7   30.93    1.31
  -1   3   8    5.83    0.53
   1   3  -8    5.45    0.60
   1   3  -8    5.46    0.48
  -1  -3  -8    4.25    0.17
  -1   3  -8    4.64    0.57
   1   3   8    5.43    0.61
   1  -3  -8    5.01    0.33
  -1   3  -8    5.68    0.58
  -1  -3  -9    3.29    0.18
  -1   3   9    3.83    0.51
   1   3  -9    3.94    0.59
   1   3  -9    3.66    0.46
  -1   3  -9    3.16    0.54
  -1   3  -9    3.85    0.48
   1   3   9    4.11    0.60
   1  -3  -9    3.79    0.32
   1   3 -10    1.28    0.35
   1   3 -10    1.56    0.51
  -1   3  10    1.42    0.45
  -1   3 -10    2.51    0.48
  -1   3 -10    2.08    0.42
   1   3  10    1.45    0.52
   1  -3 -10    1.76    0.23
   1   3 -11    2.72    0.49
   1   3 -11    3.36    0.62
  -1   3  11    2.55    0.56
   1   3  11    2.68    0.64
   1  -3 -11    2.41    0.30
  -1   3 -11    3.29    0.60
  -1   3 -11    3.85    0.59
  -1   3  12    1.96    0.55
   1   3 -12    1.60    0.59
   1   3 -12    2.40    0.57
  -1   3 -12    2.23    0.57
  -1   3 -12    1.70    0.56
   1  -3 -12    1.85    0.33
   1   3  12    1.81    0.60
  -1   3  13    2.44    0.65
   1   3 -13    2.07    0.69
   1   3 -13    2.97    0.57
  -1   3 -13    2.71    0.68
  -1   3 -13    3.56    0.76
   1  -3 -13    2.55    0.41
   1   3  13    3.54    0.74
   1   3 -14   -0.15    0.52
  -1   3  14    0.12    0.42
  -1   3 -14    1.54    0.52
  -1   3 -14    0.51    0.41
   1   3  14    0.97    0.54
   1   3 -15    0.83    0.66
   1   3 -15    3.22    0.59
   1   3  15    0.24    0.71
  -1   3  16    0.00    0.55
   1  -3  16    0.80    0.57
   1   3 -16    1.15    0.66
   1   3  16    0.71    0.71
  -1   3 -16    2.50    0.67
  -1  -3  16    1.08    0.65
   1  -3  17    1.05    0.74
  -1   3  17    1.96    0.62
   1   3 -17    0.97    0.66
  -1  -3  17   -0.41    0.67
   1   3  17   -0.09    0.73
   1   3 -18   -0.17    0.67
  -1   3  18    1.90    0.66
   1  -3  18   -0.12    0.75
   1   3  18    0.47    0.74
  -1  -3  18    0.66    0.66
   1  -3  19    0.82    0.89
  -1   3  19    2.12    0.85
   1   3  19   -0.09    0.83
   2   3   0   56.37    1.27
   2   3   0   57.68    1.38
   2  -3   0   57.89    1.42
  -2   3   0   55.48    1.38
   2   3  -1   69.73    1.38
   2   3  -1   72.98    1.80
  -2   3   1   72.05    1.69
   2  -3   1   70.05    1.70
   2   3   1   75.11    1.50
   2   3   1   70.21    1.65
  -2   3  -1   70.98    1.72
   2  -3  -1   70.60    1.60
   2   3  -2   42.42    1.32
  -2   3   2   41.47    1.14
   2  -3   2   40.96    1.18
   2   3   2   43.05    1.27
   2   3   2   40.82    0.80
   2  -3  -2   41.90    1.08
  -2   3  -2   41.35    1.18
  -2   3   3    0.29    0.16
   2   3  -3    0.17    0.08
   2   3  -3    0.28    0.21
   2  -3   3    0.33    0.15
   2   3   3    0.46    0.18
   2   3   3    0.30    0.06
   2  -3  -3    0.47    0.12
  -2   3  -3    0.23    0.18
   2   3  -4    0.57    0.11
   2   3  -4    0.60    0.25
  -2   3   4    0.39    0.19
   2  -3   4    0.25    0.22
   2   3   4    0.41    0.23
   2  -3  -4    0.77    0.15
  -2   3  -4    1.37    0.24
   2   3  -5    4.02    0.25
   2  -3   5    3.37    0.38
   2   3  -5    3.78    0.46
  -2   3   5    3.72    0.37
   2   3   5    3.73    0.37
  -2   3  -5    2.88    0.40
  -2   3   6   32.44    1.18
   2  -3   6   30.04    1.18
   2   3  -6   35.53    1.50
   2   3  -6   24.31    0.81
   2   3   6   31.66    1.30
  -2   3  -6   29.77    1.22
   2   3  -7    8.88    0.81
   2  -3   7    8.11    0.60
  -2   3   7    8.62    0.60
   2   3   7    8.89    0.76
  -2   3  -7    8.55    0.63
   2  -3  -7    8.92    0.47
   2  -3   8    2.62    0.38
  -2   3   8    3.16    0.42
   2   3  -8    2.62    0.58
   2   3   8    3.42    0.47
  -2   3  -8    2.92    0.52
   2  -3  -8    2.72    0.28
   2   3  -9    6.55    0.48
   2   3  -9    7.89    0.84
   2  -3   9    6.69    0.65
  -2   3   9    7.94    0.68
   2   3   9    7.15    0.80
   2  -3  -9    6.98    0.48
  -2   3  -9    7.07    0.76
   2   3 -10    1.67    0.54
  -2   3  10    1.72    0.47
   2  -3  10    2.15    0.45
   2   3 -10    1.86    0.35
   2   3  10    1.49    0.54
   2  -3 -10    1.72    0.29
  -2   3 -10    2.20    0.53
  -2   3  11    2.98    0.59
   2   3 -11    3.16    0.46
   2  -3  11    2.69    0.53
   2   3 -11    3.77    0.67
   2   3  11    2.89    0.67
   2  -3 -11    3.01    0.38
  -2   3 -11    3.53    0.64
   2   3 -12    2.53    0.64
  -2   3  12    2.89    0.51
   2  -3  12    2.07    0.47
   2   3 -12    2.02    0.45
   2   3  12    3.00    0.67
   2  -3 -12    1.71    0.35
  -2   3 -12    2.28    0.62
   2   3 -13   -0.19    0.46
  -2   3  13   -0.09    0.43
   2   3 -13   -0.17    0.31
   2  -3  13    0.83    0.39
   2   3  13    0.91    0.51
   2  -3 -13    0.74    0.25
  -2   3 -13   -0.13    0.46
   2   3 -14    3.40    0.67
  -2   3  14    3.61    0.78
   2  -3  14    4.46    0.71
   2   3 -14    3.74    0.86
   2   3  14    4.30    0.91
   2  -3 -14    2.74    0.55
  -2   3 -14    4.17    0.91
   2   3 -15    1.19    0.55
  -2   3  15    0.83    0.51
   2  -3  15   -0.18    0.46
  -2  -3  15   -0.25    0.42
   2   3  15    0.93    0.59
  -2   3 -15    1.01    0.60
  -2   3  16    0.90    0.57
   2  -3  16    0.86    0.49
   2   3  16   -0.45    0.63
  -2   3 -16    1.63    0.63
  -2  -3  16   -0.05    0.46
   2  -3  17    0.79    0.49
   2   3 -17    0.14    0.69
  -2   3  17    1.25    0.66
   2   3  17    1.14    0.74
  -2   3 -17   -0.33    0.71
  -2  -3  17    1.11    0.57
  -2   3  18    1.53    0.57
   2   3 -18   -0.45    0.68
   2  -3  18    0.13    0.76
   2   3  18    0.33    0.77
   2  -3  19    0.41    0.96
   2   3  19    1.50    0.94
   3   3   0    7.46    0.33
   3  -3   0    7.49    0.39
  -3   3   0    7.42    0.42
   3   3   0    7.59    0.38
  -3   3   1   31.52    0.97
   3   3  -1   31.73    1.05
   3  -3   1   30.70    1.02
   3   3   1   31.37    0.85
   3   3   1   33.01    1.00
   3  -3  -1   31.49    1.01
  -3   3  -1   31.02    0.98
   3  -3   2   85.46    2.20
   3   3  -2   88.23    1.59
   3   3  -2   85.79    2.34
  -3   3   2   86.06    2.00
   3   3   2   85.48    1.63
   3   3   2   81.81    2.05
   3  -3  -2   85.71    2.08
  -3   3  -2   83.57    2.15
  -3   3   3   17.43    0.67
   3   3  -3   17.58    0.79
   3   3  -3   18.00    0.48
   3  -3   3   17.23    0.75
   3   3   3   17.62    0.44
   3   3   3   17.95    0.79
   3  -3  -3   18.85    0.69
  -3   3  -3   19.07    0.82
   3  -3   4   49.53    1.57
   3   3  -4   48.80    1.02
   3   3  -4   48.38    1.75
  -3   3   4   51.18    1.43
   3   3   4   50.38    1.70
   3  -3  -4   48.19    1.42
  -3   3  -4   48.72    1.65
   3   3   4   48.47    0.73
  -3   3   5   14.07    0.66
   3   3  -5   15.07    0.48
   3   3  -5   15.37    0.89
   3  -3   5   14.04    0.74
   3   3   5   14.80    0.85
   3  -3  -5   14.53    0.65
  -3   3  -5   14.59    0.75
   3   3  -6    4.25    0.54
   3   3  -6    3.88    0.26
  -3   3   6    3.80    0.35
   3  -3   6    3.81    0.43
   3   3   6    3.80    0.53
   3  -3  -6    3.58    0.37
  -3   3  -6    3.57    0.48
   3   3  -7   28.62    0.94
   3   3  -7   25.35    1.40
  -3   3   7   25.27    1.08
   3  -3   7   25.95    1.20
   3   3   7   27.15    1.41
   3  -3  -7   26.11    1.03
  -3   3  -7   26.25    1.36
   3  -3   8    7.38    0.65
   3   3  -8    6.76    0.77
  -3   3   8    6.96    0.59
   3   3  -8    7.13    0.42
   3   3   8    6.84    0.77
   3  -3  -8    7.30    0.53
  -3   3  -8    7.33    0.77
  -3   3   9    1.37    0.30
   3   3  -9    0.93    0.48
   3   3  -9    0.93    0.26
   3  -3   9    0.86    0.37
   3  -3  -9    0.88    0.27
  -3   3  -9    1.28    0.46
   3   3   9    0.73    0.47
   3   3 -10   19.83    1.47
   3  -3  10   19.11    1.11
  -3   3  10   18.08    1.07
   3   3 -10   20.55    0.97
   3   3  10   19.12    1.41
   3  -3 -10   17.75    0.99
  -3   3 -10   19.83    1.38
   3   3 -11    3.25    0.71
   3   3 -11    1.88    0.36
  -3   3  11    2.20    0.43
   3  -3  11    2.33    0.49
   3   3  11    2.49    0.65
  -3   3 -11    2.14    0.64
   3   3 -12    2.10    0.37
   3   3 -12    2.55    0.74
   3  -3  12    2.27    0.50
  -3   3  12    2.16    0.45
  -3   3 -12    2.80    0.68
   3   3  12    1.61    0.57
   3   3 -13    0.93    0.64
  -3   3  13    0.84    0.49
   3  -3  13    2.46    0.53
   3  -3 -13    1.55    0.37
   3   3  13    1.00    0.67
  -3   3 -13    1.70    0.70
  -3   3  14    1.69    0.57
   3   3 -14    2.49    0.72
   3  -3  14    1.16    0.52
  -3  -3  14    2.13    0.48
   3  -3 -14    2.18    0.44
   3   3  14    2.34    0.80
  -3   3 -14    2.60    0.81
   3   3 -15    0.34    0.64
  -3   3  15    0.26    0.51
   3  -3  15    1.82    0.54
  -3  -3  15    0.72    0.42
   3   3  15    1.32    0.68
  -3   3 -15    3.31    0.68
   3  -3 -15    0.20    0.39
   3   3 -16   -0.45    0.61
   3  -3  16    0.22    0.53
   3   3  16    1.02    0.68
  -3   3 -16    1.47    0.64
   3   3 -17    0.12    0.72
  -3   3  17    0.98    0.56
   3   3  17    1.26    0.81
   3   3 -18    1.05    1.00
   3  -3  18    1.06    1.17
   3   3  18    8.34    1.14
   3   3  19   -0.09    0.69
   4   3   0    2.03    0.26
  -4   3   0    2.46    0.27
   4   3   0    1.35    0.16
   4  -3   0    2.23    0.30
   4   3  -1   33.10    0.83
   4  -3   1   32.05    1.14
  -4   3   1   33.00    1.07
   4   3  -1   32.43    1.16
   4   3   1   31.35    0.95
  -4   3  -1   32.84    1.14
   4  -3  -1   32.70    1.16
   4   3   1   32.22    0.97
   4   3  -2    5.50    0.25
   4   3  -2    5.14    0.47
  -4   3   2    4.98    0.36
   4  -3   2    5.45    0.43
   4   3   2    5.23    0.29
   4  -3  -2    5.77    0.44
  -4   3  -2    4.88    0.44
   4   3   2    5.07    0.40
   4  -3   3   13.66    0.72
   4   3  -3   13.43    0.80
  -4   3   3   13.41    0.57
   4   3   3   13.91    0.73
   4  -3  -3   13.89    0.70
  -4   3  -3   13.61    0.76
   4   3   3   12.53    0.44
  -4   3   4    1.46    0.26
   4   3  -4    1.64    0.12
   4  -3   4    1.31    0.33
   4   3  -4    1.39    0.32
   4  -3  -4    0.96    0.30
  -4   3  -4    1.65    0.35
   4   3   4    1.48    0.35
   4   3   4    1.61    0.13
   4  -3   5   10.98    0.67
   4   3  -5   11.03    0.72
  -4   3   5   11.70    0.56
   4   3  -5   10.07    0.32
   4   3   5   10.19    0.27
   4  -3  -5   10.50    0.64
  -4   3  -5    9.40    0.66
   4   3   5   10.85    0.78
   4   3  -6   14.50    1.02
   4   3  -6   14.85    0.48
  -4   3   6   14.95    0.68
   4  -3   6   15.50    0.85
   4  -3  -6   14.12    0.81
  -4   3  -6   13.43    0.91
   4   3   6   15.34    0.92
   4   3  -7    3.20    0.25
   4  -3   7    3.19    0.46
   4   3  -7    3.62    0.59
  -4   3   7    3.64    0.35
   4  -3  -7    2.60    0.38
   4   3   7    2.79    0.60
  -4   3  -7    3.74    0.57
   4  -3   8    7.26    0.65
   4   3  -8    7.17    0.83
  -4   3   8    7.51    0.55
   4   3  -8    7.06    0.41
   4  -3  -8    7.26    0.61
   4   3   8    6.72    0.72
  -4   3  -8    6.86    0.80
   4   3  -9    4.10    0.35
  -4   3   9    4.27    0.44
   4  -3   9    4.05    0.55
   4   3  -9    4.27    0.69
  -4   3  -9    4.77    0.70
   4   3   9    3.36    0.62
   4  -3  -9    3.75    0.48
   4   3 -10    5.11    0.84
   4   3 -10    4.86    0.41
  -4   3  10    5.44    0.53
   4  -3  10    4.92    0.63
   4  -3 -10    4.65    0.59
   4   3  10    5.61    0.84
  -4   3 -10    4.24    0.81
   4   3 -11    7.87    1.00
  -4   3  11    7.15    0.64
   4  -3  11    6.58    0.77
   4   3  11    6.64    1.02
   4  -3 -11    5.59    0.74
  -4   3 -11    7.20    0.95
   4   3 -12    0.46    0.51
  -4   3  12    0.52    0.31
   4  -3  12    0.20    0.34
  -4  -3  12    0.69    0.27
   4   3  12    0.02    0.52
   4  -3 -12    0.16    0.37
  -4   3 -12    0.19    0.49
   4  -3  13    0.06    0.36
   4   3 -13    0.01    0.51
  -4   3  13    0.89    0.32
   4   3  13    0.81    0.47
  -4  -3  13    0.32    0.32
   4  -3 -13    0.26    0.36
  -4   3 -13    0.36    0.57
  -4   3  14    1.16    0.47
   4  -3  14    0.77    0.49
   4   3 -14    1.55    0.71
  -4  -3  14    0.72    0.34
   4  -3 -14    0.93    0.41
  -4   3 -14    1.09    0.74
   4   3  14    1.13    0.70
   4   3 -15    0.50    0.61
   4  -3  15    0.36    0.41
   4   3  15    0.15    0.66
   4  -3 -15    0.64    0.38
  -4   3 -15    1.25    0.66
   4   3 -16    2.09    0.83
  -4   3  16    2.85    0.63
   4  -3  16    1.92    0.55
  -4   3 -16    1.90    0.93
   4   3  16    0.53    0.92
   4   3 -17   -0.45    0.73
  -4   3  17    0.97    0.50
  -4   3 -17    0.66    0.75
   4   3  17    1.49    0.84
   4   3 -18   -0.39    0.60
   4   3  18   -0.46    0.76
  -4   3 -18   -0.08    0.59
   4  -3  19   -0.05    0.79
   4   3  19    0.31    0.72
  -5   3   0    2.60    0.33
   5  -3   0    2.07    0.39
   5   3   0    2.80    0.36
   5   3  -1   16.39    0.54
  -5   3   1   16.75    0.74
   5  -3   1   16.85    0.84
   5   3  -1   15.90    0.84
   5   3   1   16.36    0.73
  -5   3  -1   16.32    0.81
   5  -3  -1   16.66    0.87
   5   3   1   15.94    0.68
   5   3  -2   40.80    1.60
   5   3  -2   41.30    0.89
  -5   3   2   42.54    1.34
   5  -3   2   40.29    1.52
   5   3   2   42.82    1.28
   5   3   2   41.84    1.43
   5  -3  -2   40.90    1.53
  -5   3  -2   44.11    1.61
   5   3  -3    6.01    0.23
   5   3  -3    6.62    0.55
  -5   3   3    6.37    0.42
   5  -3   3    6.61    0.57
   5   3   3    6.47    0.54
   5  -3  -3    6.93    0.55
   5   3   3    6.28    0.36
  -5   3  -3    6.37    0.56
   5   3  -4    8.66    0.68
   5   3  -4    8.45    0.24
  -5   3   4    8.52    0.46
   5  -3   4    8.44    0.64
   5   3   4    8.05    0.37
   5   3   4    8.73    0.70
   5  -3  -4    8.61    0.64
  -5   3  -4    8.99    0.70
   5   3  -5    0.69    0.08
  -5   3   5    0.67    0.23
   5  -3   5    0.81    0.31
   5   3  -5    0.66    0.39
   5   3   5    0.72    0.12
   5  -3  -5    0.37    0.32
  -5   3  -5    1.09    0.34
   5   3   5    0.64    0.36
   5   3  -6   27.77    0.58
   5   3  -6   28.55    1.56
  -5   3   6   28.37    1.04
   5  -3   6   29.57    1.32
   5   3   6   26.71    0.64
   5   3   6   27.62    1.39
   5  -3  -6   28.65    1.34
  -5   3  -6   28.98    1.50
   5   3  -7    1.09    0.13
  -5   3   7    0.85    0.24
   5  -3   7    0.96    0.36
   5   3  -7    0.89    0.45
   5   3   7    0.76    0.10
   5  -3  -7    0.82    0.36
   5   3   7    1.25    0.45
  -5   3  -7    1.10    0.45
   5   3  -8    4.84    0.24
   5   3  -8    5.71    0.79
  -5   3   8    5.87    0.44
   5  -3   8    5.74    0.62
   5   3   8    5.82    0.78
  -5   3  -8    6.19    0.79
   5  -3  -8    6.39    0.69
   5   3  -9    4.23    0.80
  -5   3   9    4.47    0.44
   5  -3   9    4.89    0.54
   5   3   9    5.42    0.82
  -5   3  -9    3.84    0.77
   5  -3  -9    4.83    0.63
  -5   3  10    8.86    0.68
   5  -3  10    9.64    0.76
   5   3 -10    9.41    1.08
  -5  -3  10    7.71    0.43
   5   3  10    9.01    1.10
   5  -3 -10    9.18    0.84
  -5   3 -10    8.96    1.06
   5   3 -11    5.49    0.93
  -5   3  11    4.44    0.51
   5  -3  11    4.04    0.69
   5   3  11    5.35    0.95
   5  -3 -11    4.27    0.72
  -5   3 -11    5.98    0.89
   5   3 -12    4.48    0.87
  -5   3  12    3.68    0.53
   5  -3  12    3.30    0.59
   5   3  12    3.87    0.77
   5  -3 -12    3.34    0.60
  -5   3 -12    2.99    0.85
  -5   3  13    1.05    0.35
   5   3 -13    1.16    0.63
   5  -3  13    0.39    0.48
   5   3  13    0.93    0.66
  -5   3 -13    0.51    0.71
   5  -3 -13    0.79    0.52
   5   3 -14    0.54    0.74
  -5   3  14    1.99    0.43
   5  -3  14    0.97    0.44
   5   3  14    0.95    0.71
   5  -3 -14    0.17    0.45
  -5   3 -14    0.21    0.72
   5   3 -15    0.03    0.74
  -5   3  15    0.94    0.39
   5  -3 -15    0.00    0.43
   5   3  15    1.32    0.71
  -5   3 -15    1.31    0.72
   5   3 -16    1.56    0.77
   5   3  16    4.11    0.97
  -5   3 -16    1.49    1.00
   5   3 -17    1.60    0.81
   5   3  17    0.30    0.89
  -5   3 -17    1.18    0.86
   5   3 -18    1.14    0.76
   5   3  18    0.42    0.88
  -5   3 -18    0.20    0.68
   5   3  19    2.73    1.24
   6  -3   0    0.01    0.28
  -6   3   0    0.01    0.23
   6   3   0    0.17    0.25
   6   3   0    0.41    0.12
   6  -3   1    3.46    0.49
  -6   3   1    3.40    0.35
   6   3  -1    3.70    0.48
   6   3  -1    3.66    0.27
   6  -3  -1    3.39    0.43
   6   3   1    3.25    0.38
   6   3   1    3.78    0.32
  -6   3   2    2.40    0.32
   6   3  -2    1.96    0.45
   6   3  -2    2.64    0.19
   6  -3   2    2.04    0.45
   6   3   2    2.59    0.34
  -6   3  -2    2.69    0.43
   6   3   2    2.13    0.29
   6  -3  -2    2.94    0.45
  -6   3   3    1.09    0.23
   6   3  -3    1.11    0.11
   6   3  -3    1.03    0.41
   6  -3   3    1.11    0.35
  -6   3  -3    0.78    0.35
   6   3   3    0.94    0.20
   6   3   3    1.41    0.34
   6  -3  -3    1.61    0.37
  -6   3   4   18.13    0.74
   6   3  -4   17.77    0.33
   6  -3   4   18.81    1.04
   6   3  -4   18.08    1.18
   6  -3  -4   19.33    1.07
   6   3   4   18.90    1.09
  -6   3  -4   18.38    1.07
   6   3   4   18.89    0.74
   6  -3   5    0.29    0.33
   6   3  -5    0.81    0.41
  -6   3   5    0.47    0.19
   6   3   5    0.59    0.16
   6   3   5    0.67    0.38
   6  -3  -5    0.76    0.37
  -6   3  -5    1.04    0.36
  -6   3   6    8.73    0.50
   6   3  -6    8.94    0.93
   6  -3   6    8.52    0.73
  -6   3  -6    8.44    0.87
   6   3   6    9.20    0.85
   6   3   6    8.81    0.39
   6  -3  -6    9.34    0.79
  -6   3   7    0.70    0.23
   6   3  -7    0.91    0.40
   6  -3   7    0.93    0.36
   6   3   7    0.76    0.15
   6   3   7    0.91    0.45
   6  -3  -7    0.62    0.41
  -6   3  -7    0.72    0.46
  -6   3   8    3.86    0.37
   6  -3   8    3.73    0.56
   6   3  -8    4.11    0.76
  -6   3  -8    3.78    0.74
   6   3   8    3.93    0.73
   6  -3  -8    4.02    0.66
   6  -3   9    0.52    0.31
   6   3  -9   -0.15    0.48
  -6   3   9    0.37    0.21
   6  -3  -9    0.21    0.34
  -6   3  -9    0.93    0.46
   6   3   9    0.23    0.47
  -6   3  10    2.70    0.39
   6   3 -10    3.19    0.77
   6  -3  10    3.00    0.53
  -6   3 -10    3.10    0.76
   6   3  10    3.25    0.77
   6  -3 -10    2.88    0.64
  -6   3  11    0.70    0.27
   6   3 -11    0.54    0.58
   6  -3  11    0.75    0.39
   6   3  11   -0.12    0.60
   6  -3 -11    1.02    0.40
  -6   3 -11    0.53    0.58
  -6   3  12    0.97    0.34
   6  -3  12    1.64    0.52
   6   3 -12    1.54    0.59
   6  -3 -12    1.54    0.59
  -6   3 -12    1.90    0.70
   6   3  12    1.68    0.60
   6  -3  13    1.12    0.49
   6   3 -13    1.92    0.76
  -6   3  13    1.43    0.38
  -6   3 -13    1.07    0.66
   6  -3 -13    1.39    0.63
   6   3  13    1.04    0.74
  -6   3  14    0.16    0.31
   6   3 -14    1.27    0.64
  -6   3 -14    1.22    0.69
   6   3  14    0.68    0.67
   6  -3 -14    0.38    0.46
   6   3 -15    0.34    0.67
   6  -3  15    0.72    0.46
   6   3  15    1.31    0.70
  -6   3 -15    0.35    0.67
   6  -3 -15   -0.13    0.41
   6   3 -16    1.50    0.86
   6   3  16    2.64    0.80
   6  -3 -16    0.14    0.56
  -6   3 -16   -0.47    0.82
   6   3 -17    0.05    0.94
  -6   3 -17    1.40    0.88
   6   3  17    1.87    0.94
   6   3 -18    0.19    0.79
  -6   3 -18    1.94    0.86
   6   3  18   -0.19    0.74
   7   3   0    1.70    0.34
   7   3   0    1.63    0.22
   7  -3   0    1.86    0.44
  -7   3   1    5.77    0.45
   7  -3   1    5.21    0.63
   7   3  -1    5.41    0.63
   7   3  -1    5.20    0.33
  -7   3  -1    6.63    0.56
   7   3   1    5.39    0.49
   7   3   1    5.77    0.41
   7  -3  -1    5.27    0.64
  -7   3   2    2.56    0.32
   7   3  -2    2.56    0.19
   7   3  -2    2.22    0.52
   7  -3   2    2.92    0.50
  -7   3  -2    2.85    0.47
   7   3   2    2.94    0.41
   7  -3  -2    2.30    0.50
   7   3   2    2.94    0.36
   7   3  -3    6.17    0.24
   7  -3   3    6.24    0.67
   7   3  -3    6.13    0.74
  -7   3   3    6.48    0.45
  -7   3  -3    6.43    0.67
   7   3   3    6.68    0.46
   7   3   3    6.86    0.59
   7  -3  -3    6.41    0.59
   7  -3   4   18.34    1.11
   7   3  -4   18.54    1.25
  -7   3   4   18.48    0.79
   7   3   4   19.07    1.18
   7   3   4   18.27    0.78
  -7   3  -4   18.10    1.14
   7  -3  -4   18.57    1.19
   7  -3   5   10.64    0.83
  -7   3   5    9.55    0.53
   7   3  -5   10.39    0.97
   7  -3  -5    9.19    0.93
   7   3   5    9.55    0.57
  -7   3  -5    9.42    0.91
   7   3   5    9.69    0.89
   7   3  -6    4.44    0.63
   7  -3   6    4.02    0.58
  -7   3   6    3.45    0.32
   7   3   6    3.07    0.33
   7  -3  -6    4.29    0.65
  -7   3  -6    4.03    0.68
   7   3   6    3.34    0.66
  -7   3   7    6.57    0.45
   7  -3   7    7.11    0.73
   7   3  -7    6.70    0.95
  -7   3  -7    7.20    0.92
   7   3   7    6.89    0.40
   7   3   7    7.17    0.91
   7  -3  -7    7.83    0.86
  -7   3   8    9.81    0.57
   7   3  -8   10.44    1.17
   7  -3   8   10.61    0.84
   7   3   8    8.97    0.44
  -7   3  -8   10.84    1.12
   7   3   8   10.39    1.10
   7  -3  -8   11.00    1.00
   7   3  -9    0.27    0.60
  -7   3   9    0.71    0.24
   7  -3   9    0.78    0.42
  -7   3  -9    0.17    0.56
   7   3   9    0.71    0.56
   7  -3  -9    1.71    0.53
   7   3 -10    4.95    0.81
  -7   3  10    4.56    0.45
   7  -3  10    4.82    0.72
  -7   3 -10    5.43    0.80
   7  -3 -10    4.75    0.82
   7   3  10    4.68    0.93
   7   3 -11    1.80    0.76
  -7   3  11    1.61    0.31
   7  -3  11    2.13    0.54
  -7   3 -11    1.10    0.71
   7   3  11    1.63    0.74
   7  -3 -11    1.11    0.60
  -7   3  12    0.86    0.33
   7   3 -12    2.03    0.73
   7  -3  12    1.08    0.47
   7  -3 -12    1.70    0.61
   7   3  12    1.43    0.76
  -7   3 -12    1.31    0.63
   7   3 -13    0.24    0.58
   7  -3  13    0.08    0.41
   7   3  13    0.34    0.58
   7  -3 -13   -0.01    0.50
  -7   3 -13    0.77    0.62
   7   3 -14    1.15    0.64
   7  -3  14   -0.12    0.45
   7   3  14    0.58    0.61
   7  -3 -14   -0.25    0.53
  -7   3 -14    0.77    0.67
   7   3 -15    0.78    0.74
   7  -3  15    0.94    0.53
   7  -3 -15   -0.10    0.65
  -7   3 -15    0.35    0.62
   7   3 -16    1.89    0.79
   7  -3 -16   -0.03    0.60
   7   3  16    0.25    0.69
  -7   3 -16    1.31    0.86
   7   3 -17    0.61    0.93
   7   3  17    1.07    0.96
  -7   3 -17    1.12    0.89
   7   3 -18    0.54    0.84
   7   3  18    0.63    0.80
  -7   3 -18   -0.45    0.79
   8   3   0    0.68    0.19
   8  -3   0    0.70    0.40
  -8   3   0    0.81    0.29
   8   3   0    0.92    0.37
   8  -3   1    1.88    0.51
  -8   3   1    2.93    0.36
   8   3  -1    2.10    0.23
   8   3  -1    2.44    0.48
   8   3   1    2.03    0.44
  -8   3  -1    2.14    0.43
   8   3   1    1.05    0.31
   8  -3  -1    2.28    0.51
   8   3  -2   10.57    0.95
   8  -3   2    9.21    0.86
   8   3  -2    8.88    0.37
  -8   3   2   11.40    0.67
   8   3   2    9.60    0.75
   8  -3  -2    9.90    0.89
   8   3   2   10.43    0.73
  -8   3  -2   10.20    0.81
  -8   3   3    1.21    0.26
   8  -3   3    1.43    0.47
   8   3  -3    1.74    0.53
   8   3   3    1.79    0.39
  -8   3  -3    2.35    0.44
   8   3   3    1.29    0.31
   8  -3  -3    1.32    0.50
   8  -3   4    9.80    0.86
  -8   3   4    9.31    0.55
   8   3  -4   10.09    1.01
   8   3   4    9.73    0.85
   8  -3  -4    9.77    0.96
   8   3   4    9.48    0.62
  -8   3  -4    9.55    0.87
   8   3  -5    6.43    0.93
  -8   3   5    7.17    0.47
   8  -3   5    6.90    0.76
  -8   3  -5    6.69    0.86
   8   3   5    5.91    0.81
   8   3   5    7.58    0.57
   8  -3  -5    7.24    0.89
   8  -3   6    7.04    0.76
  -8   3   6    6.40    0.45
   8   3  -6    6.91    0.83
   8   3   6    6.41    0.48
  -8   3  -6    7.61    0.90
   8  -3  -6    7.45    0.89
   8   3   6    7.27    0.89
  -8   3   7    5.81    0.43
   8  -3   7    6.18    0.79
   8   3  -7    7.40    0.99
  -8   3  -7    7.46    0.97
   8   3   7    6.57    0.49
   8  -3  -7    7.58    0.93
   8   3   7    5.89    0.92
  -8   3   8    3.76    0.40
   8  -3   8    3.83    0.60
   8   3  -8    3.10    0.90
  -8   3  -8    3.71    0.84
   8   3   8    3.86    0.86
   8  -3  -8    4.29    0.79
   8   3   8    4.14    0.37
   8   3  -9    4.54    0.96
  -8   3   9    4.36    0.39
   8  -3   9    4.94    0.72
   8   3   9    5.32    0.97
  -8   3  -9    4.76    0.96
   8  -3  -9    5.52    0.93
   8  -3  10    0.24    0.41
  -8   3  10    0.38    0.23
   8   3 -10    0.17    0.58
   8   3  10    0.12    0.57
   8  -3 -10    1.21    0.50
  -8   3 -10   -0.01    0.42
   8  -3  11    1.52    0.54
   8   3 -11    1.69    0.62
   8   3  11    1.52    0.72
   8  -3 -11    0.88    0.63
  -8   3 -11    1.54    0.74
   8   3 -12    0.39    0.62
   8  -3  12   -0.13    0.44
   8   3  12    0.94    0.52
  -8   3 -12    1.23    0.67
   8  -3 -12   -0.01    0.55
   8   3 -13    0.33    0.49
   8  -3  13    0.17    0.34
  -8   3 -13   -0.19    0.42
   8  -3 -13   -0.17    0.39
   8  -3  14    0.94    0.43
   8   3 -14   -0.19    0.72
  -8   3 -14    0.16    0.70
   8   3  14    0.07    0.74
   8  -3 -15   -0.09    0.59
   8   3  15   -0.48    0.69
   8  -3 -16   -0.19    0.65
   8   3  16    1.21    0.79
  -8   3 -16    0.64    0.80
   8   3  17    1.37    1.07
  -8   3 -17    1.73    1.02
  -9   3   0   25.05    1.27
   9  -3   0   24.23    1.53
   9   3   0   25.82    1.47
   9   3   0   25.55    1.02
   9  -3   1    3.17    0.64
  -9   3   1    3.48    0.44
   9   3  -1    2.90    0.29
   9   3  -1    3.55    0.63
   9  -3  -1    3.63    0.62
   9   3   1    3.91    0.59
  -9   3  -1    3.66    0.48
   9   3  -2    1.13    0.17
   9   3  -2    1.99    0.53
  -9   3   2    1.73    0.31
   9  -3   2    0.90    0.51
   9  -3  -2    1.19    0.41
   9   3   2    1.01    0.37
  -9   3  -2    0.88    0.38
   9   3   2    1.15    0.34
  -9   3   3    5.82    0.49
   9  -3   3    5.75    0.79
   9   3  -3    6.88    0.88
   9  -3  -3    7.17    0.85
  -9   3  -3    6.45    0.74
   9   3   3    5.88    0.65
   9   3   3    6.37    0.65
   9  -3   4    0.17    0.33
   9   3  -4    0.22    0.38
  -9   3   4   -0.08    0.17
   9   3   4    0.30    0.23
   9  -3  -4   -0.23    0.38
   9   3   4    0.25    0.32
  -9   3  -4    0.17    0.35
   9   3  -5   13.32    1.31
  -9   3   5   11.83    0.65
   9  -3   5   13.62    1.10
   9  -3  -5   14.17    1.24
  -9   3  -5   13.76    1.24
   9   3   5   12.90    1.13
   9   3   5   12.66    0.82
   9   3  -6   12.04    1.33
   9  -3   6   12.79    1.10
  -9   3   6   11.19    0.67
   9   3   6   11.54    0.76
  -9   3  -6   13.73    1.28
   9  -3  -6   11.58    1.27
   9   3   6   12.83    1.22
  -9   3   7    3.39    0.34
   9  -3   7    4.16    0.72
   9   3  -7    4.11    0.90
  -9   3  -7    3.38    0.87
   9  -3  -7    4.29    0.87
   9   3   7    4.08    0.49
   9   3   7    4.49    0.86
   9   3  -8    0.09    0.54
   9  -3   8   -0.17    0.39
  -9   3   8   -0.09    0.17
   9   3   8    0.06    0.48
   9   3   8    0.59    0.20
   9  -3  -8    0.63    0.52
  -9   3  -8    0.34    0.48
   9   3  -9    0.17    0.68
   9  -3   9    0.78    0.44
  -9   3  -9    0.79    0.53
   9  -3  -9    1.89    0.67
   9   3   9    1.68    0.67
   9  -3  10    0.42    0.47
   9   3 -10    0.37    0.60
   9  -3 -10    1.14    0.58
  -9   3 -10    0.38    0.62
   9   3  10    0.60    0.66
   9   3 -11    0.47    0.71
   9  -3  11    0.74    0.43
  -9   3 -11    1.41    0.67
   9  -3 -11    0.64    0.59
   9   3  11   -0.04    0.69
   9  -3  12    0.25    0.44
   9  -3 -12    0.28    0.53
   9   3  12    0.23    0.63
   9  -3  13    0.50    0.42
  -9   3 -13    0.43    0.68
   9   3  13   -0.40    0.70
   9  -3  14    0.66    0.49
   9   3 -14    1.48    0.81
   9   3  14   -0.27    0.80
   9  -3 -14    1.80    0.75
  -9   3 -14   -0.23    0.79
   9   3 -15   -0.12    0.76
   9   3  15    1.07    0.74
   9  -3 -15   -0.27    0.62
  -9   3 -15    0.63    0.62
   9   3 -16    1.16    0.95
   9   3  16    0.47    0.89
   9  -3 -16    1.15    0.93
  -9   3 -16    0.62    0.93
  10   3   0    3.63    0.42
 -10   3   0    3.27    0.48
  10  -3   0    3.00    0.70
  10   3   0    3.14    0.65
  10   3  -1    1.21    0.48
  10  -3   1    0.21    0.47
  10   3  -1    0.55    0.20
 -10   3   1    1.01    0.34
  10   3   1    1.28    0.46
  10   3   1    0.85    0.27
  10  -3  -1    0.32    0.48
 -10   3  -1    0.54    0.34
 -10   3   2    1.76    0.43
  10  -3   2    2.24    0.64
  10   3  -2    2.29    0.62
  10   3   2    2.40    0.43
 -10   3  -2    2.32    0.57
  10  -3  -2    2.08    0.65
  10   3   2    2.82    0.50
  10   3  -3    1.37    0.64
  10  -3   3    1.20    0.57
 -10   3   3    1.59    0.32
  10   3   3    1.28    0.47
  10  -3  -3    1.51    0.60
 -10   3  -3    1.64    0.49
  10   3   3    1.62    0.44
  10   3  -4    5.17    0.93
  10  -3   4    5.54    0.84
 -10   3   4    4.79    0.47
  10  -3  -4    4.57    0.87
 -10   3  -4    5.55    0.83
  10   3   4    4.53    0.58
  10   3   4    4.77    0.76
  10   3  -5    1.27    0.63
 -10   3   5    0.81    0.24
  10  -3   5    0.85    0.53
  10   3   5    0.98    0.37
  10  -3  -5    1.15    0.62
 -10   3  -5    1.79    0.58
  10   3   5    0.64    0.47
  10   3  -6    1.32    0.65
  10  -3   6    0.70    0.50
 -10   3   6    0.75    0.27
  10   3   6    0.75    0.33
 -10   3  -6    0.67    0.58
  10  -3  -6    1.56    0.63
  10   3   6    0.82    0.56
  10  -3   7    1.72    0.60
  10   3  -7    1.97    0.77
  10   3   7    1.95    0.69
 -10   3  -7    1.09    0.69
  10   3   7    1.65    0.38
  10  -3  -7    1.91    0.75
  10  -3   8    1.10    0.52
  10   3  -8    0.97    0.73
  10   3   8    1.38    0.32
 -10   3  -8    0.75    0.68
  10  -3  -8    1.16    0.77
  10   3   8    0.98    0.69
  10  -3   9    2.74    0.61
  10   3  -9    3.02    0.93
  10  -3  -9    2.90    0.77
  10   3   9    1.49    0.86
 -10   3  -9    2.43    0.85
  10  -3  10    0.82    0.49
  10   3 -10    0.81    0.71
  10  -3 -10    1.74    0.72
 -10   3 -10    0.35    0.70
  10   3  10    1.08    0.73
  10  -3  11    0.56    0.42
  10   3 -11    0.25    0.66
  10   3  11    0.35    0.66
 -10   3 -11    0.32    0.68
  10  -3 -11    0.19    0.58
  10   3 -12   -0.07    0.75
  10  -3  12    0.79    0.55
 -10   3 -12    0.16    0.78
  10  -3 -12    1.67    0.60
  10   3  12    0.31    0.65
  10  -3  13    0.95    0.53
  10   3 -13   -0.32    0.85
  10   3  13   -0.03    0.90
  10  -3 -13    3.26    0.79
  10   3 -14    0.71    0.94
 -10   3 -14    2.41    0.93
  10   3  14    0.40    0.98
  10  -3 -15    3.06    0.91
  10   3  15   -0.45    1.09
  10   3 -16   -0.26    1.04
  10   3  16    1.81    1.01
 -10   3 -16    1.09    0.97
  11   3   0    0.67    0.26
  11   3   0    1.45    0.51
  11  -3   0    0.29    0.53
 -11   3   0    0.86    0.39
  11   3  -1    2.25    0.29
 -11   3   1    2.04    0.43
  11  -3   1    1.73    0.67
  11   3  -1    1.58    0.68
  11   3   1    2.51    0.40
  11   3   1    2.86    0.66
 -11   3  -1    2.70    0.56
  11  -3  -1    2.85    0.69
  11   3  -2    0.98    0.57
  11  -3   2    1.00    0.55
 -11   3   2    0.77    0.32
  11   3   2    0.82    0.40
 -11   3  -2    1.00    0.43
  11  -3  -2    1.36    0.59
  11   3   2    0.57    0.45
  11   3  -3    3.18    0.87
  11  -3   3    3.20    0.78
 -11   3   3    3.72    0.51
  11   3   3    3.63    0.61
  11  -3  -3    2.46    0.85
 -11   3  -3    3.35    0.64
  11   3   3    3.28    0.63
  11  -3   4    0.93    0.49
 -11   3   4    0.46    0.24
  11   3  -4   -0.12    0.57
  11   3   4    0.29    0.39
 -11   3  -4    0.41    0.50
  11  -3  -4    0.00    0.55
  11   3   4    0.44    0.46
  11   3  -5    3.33    0.91
 -11   3   5    2.67    0.47
  11  -3   5    4.01    0.80
  11   3   5    3.45    0.77
  11   3   5    3.66    0.58
  11  -3  -5    3.28    0.92
 -11   3  -5    4.55    0.83
  11   3  -6    0.95    0.60
  11  -3   6    0.38    0.51
  11   3   6    0.80    0.48
  11   3   6    0.03    0.35
  11  -3  -6    0.39    0.61
 -11   3  -6    0.92    0.59
  11   3  -7    2.68    1.01
  11  -3   7    3.44    0.75
  11   3   7    4.15    0.55
  11   3   7    3.95    0.93
  11  -3  -7    3.17    1.00
 -11   3  -7    4.91    0.95
  11   3  -8    0.84    0.67
  11  -3   8    1.07    0.54
  11   3   8    0.57    0.63
 -11   3  -8    0.14    0.65
  11  -3  -8   -0.12    0.71
  11   3  -9    0.20    0.66
  11  -3   9    0.22    0.54
  11   3   9    0.41    0.65
  11  -3  -9    0.39    0.71
 -11   3  -9    1.21    0.65
  11   3 -10    0.10    0.57
  11  -3  10    0.15    0.43
  11   3  10    0.38    0.56
  11  -3 -10   -0.24    0.55
  11   3 -11   -0.14    0.75
  11  -3  11    1.05    0.53
  11   3  11    2.42    0.83
  11  -3 -11    0.77    0.76
  11   3 -12    1.27    0.63
  11   3  12    0.33    0.80
  11  -3 -12   -0.33    0.69
  11   3 -13   -0.31    0.76
 -11   3 -13    0.53    0.74
  11   3  13    0.72    0.79
  11   3  14    0.13    1.00
  11  -3 -14    1.63    0.90
 -11   3 -15    0.33    0.86
  12  -3   0    0.70    0.48
  12   3   0    0.05    0.26
  12   3   0    0.44    0.48
 -12   3   0    0.10    0.33
  12   3  -1    0.81    0.54
 -12   3   1    0.57    0.34
  12  -3   1    0.56    0.53
  12   3   1    0.12    0.47
  12   3   1    0.02    0.29
  12  -3  -1    1.13    0.56
 -12   3  -1    1.03    0.42
 -12   3   2    0.84    0.39
  12  -3   2    1.73    0.62
  12   3  -2    0.76    0.66
  12   3   2    1.18    0.40
  12   3   2    1.11    0.60
 -12   3  -2    1.77    0.55
  12  -3  -2    1.30    0.67
 -12   3   3    0.54    0.24
  12   3  -3    0.30    0.55
  12  -3   3    0.45    0.47
  12   3   3   -0.10    0.43
 -12   3  -3   -0.14    0.45
  12   3   3   -0.27    0.39
  12  -3  -3    0.11    0.52
  12   3  -4    0.85    0.66
  12  -3   4    0.85    0.59
  12   3   4    0.83    0.50
  12  -3  -4    0.74    0.67
  12   3   4    0.91    0.49
 -12   3  -4    0.77    0.51
  12   3  -5    0.57    0.66
  12  -3   5    0.35    0.48
  12   3   5    0.92    0.39
  12   3   5   -0.35    0.54
 -12   3  -5    0.51    0.55
  12  -3  -5    0.67    0.63
  12  -3   6    1.33    0.61
  12   3  -6   -0.43    0.72
 -12   3  -6    1.01    0.65
  12   3   6    1.18    0.43
  12  -3  -6    0.31    0.73
  12   3   6    1.22    0.65
  12  -3   7    0.44    0.48
  12   3  -7   -0.43    0.66
  12   3   7    1.18    0.38
  12   3   7    0.08    0.62
  12  -3  -7   -0.44    0.63
 -12   3  -7    0.42    0.61
  12  -3   8    0.00    0.59
  12   3  -8    0.53    0.75
  12   3   8    1.48    0.69
  12  -3  -8    0.75    0.76
 -12   3  -8    0.58    0.66
  12   3  -9    0.01    0.68
  12  -3   9    1.04    0.52
  12   3   9   -0.07    0.66
 -12   3  -9   -0.09    0.62
  12  -3  -9    0.22    0.68
  12  -3  10    0.93    0.53
  12   3 -10   -0.05    0.75
  12   3  10    0.00    0.74
 -12   3 -10    0.23    0.75
  12  -3 -10    1.17    0.76
  12   3 -11   -0.04    0.66
  12  -3  11    0.03    0.56
 -12   3 -11    0.09    0.75
  12  -3 -11    1.35    0.70
  12   3 -12    0.24    0.76
  12   3  12   -0.25    0.85
  12  -3 -12    1.55    0.78
 -12   3 -12   -0.07    0.81
  12   3  13    2.68    1.20
 -12   3 -13    2.42    1.13
  12  -3 -13    1.50    1.15
  12   3 -14    2.31    1.05
  12  -3 -14    2.09    1.09
 -12   3 -14   -0.53    1.10
  13  -3   0    1.42    0.66
  13   3   0    0.42    0.64
 -13   3   0    0.79    0.43
  13  -3   1    0.08    0.63
  13   3  -1   -0.25    0.63
 -13   3   1    1.01    0.43
  13  -3  -1    0.50    0.67
  13   3   1    0.88    0.60
 -13   3  -1    1.22    0.44
 -13   3   2    1.02    0.45
  13   3  -2    1.29    0.71
  13  -3   2    1.55    0.69
 -13   3  -2    0.95    0.58
  13   3   2    1.25    0.66
  13   3   2    0.78    0.44
  13  -3  -2    1.27    0.60
  13   3  -3    3.41    0.95
  13  -3   3    2.62    0.83
  13   3   3    2.75    0.66
 -13   3  -3    2.93    0.74
  13  -3  -3    2.61    0.92
  13   3   3    1.81    0.77
  13  -3  -4    0.72    0.62
 -13   3  -4    0.40    0.53
  13   3   4    0.30    0.49
  13   3   4    0.06    0.49
  13   3  -5   -0.49    0.79
  13  -3   5    0.51    0.67
  13  -3  -5    0.61    0.77
 -13   3  -5    1.29    0.66
  13   3   5    0.58    0.63
  13   3   5    2.38    0.50
  13   3  -6    2.17    0.85
  13  -3   6    1.14    0.68
 -13   3  -6    0.64    0.64
  13   3   6    2.06    0.50
  13  -3  -6   -0.22    0.65
  13   3   6    0.93    0.75
  13  -3   7    0.76    0.53
 -13   3  -7   -0.11    0.56
  13   3   7   -0.24    0.58
  13   3  -8    0.32    0.83
  13  -3   8    1.41    0.67
  13  -3  -8    0.17    0.87
 -13   3  -8    1.34    0.80
  13   3   8    0.82    0.80
  13  -3   9    0.34    0.59
  13   3  -9    0.03    0.71
 -13   3  -9    0.43    0.73
  13  -3  -9    0.48    0.74
  13   3 -10   -0.35    0.86
  13  -3  10    1.33    0.60
  13  -3 -10    1.21    0.89
  13  -3  11    1.96    0.78
  13   3 -11    0.22    0.93
 -13   3 -11    0.67    1.00
  13   3  11    2.09    1.05
  13   3 -12   -0.09    1.00
  13  -3 -12    2.62    1.07
 -13   3 -12    2.73    1.06
  14  -3   0    0.45    0.67
  14   3   0   -0.09    0.66
 -14   3   0    1.00    0.47
  14  -3   1    0.98    0.75
  14   3   1    1.03    0.78
  14  -3  -1    2.72    0.81
  14   3  -2    0.83    0.74
  14   3   2    0.10    0.64
  14  -3  -2    1.36    0.73
  14  -3   3    0.87    0.68
  14   3   3    0.11    0.66
  14   3   3    0.91    0.47
  14  -3  -3    1.51    0.73
 -14   3  -3    0.63    0.59
  14   3  -4    1.24    0.86
  14  -3   4    2.01    0.73
  14  -3  -4    2.34    0.80
  14   3   4    0.49    0.70
  14   3   4    0.83    0.63
 -14   3  -4    0.56    0.69
  14   3  -5    1.31    0.74
 -14   3  -5    0.47    0.63
  14   3   5    0.96    0.51
  14  -3  -5   -0.39    0.56
  14   3  -6    1.27    0.85
  14  -3   6    0.20    0.70
  14   3   6    1.29    0.67
 -14   3  -6    1.32    0.76
  14  -3  -6    0.68    0.80
  14   3  -7    1.81    0.90
  14   3   7    1.21    0.83
 -14   3  -7    0.81    0.88
  14  -3  -7    0.59    0.93
  14   3  -8    1.32    0.90
  14  -3   8    0.29    0.70
  14   3   8    1.89    0.86
  14  -3   9    0.44    0.72
  14   3  -9   -0.11    0.93
 -14   3  -9    2.17    0.93
  14   3   9    2.20    0.91
  14  -3  -9   -0.32    0.91
  14   3 -10    0.30    1.00
  14  -3  10    1.00    0.67
 -14   3 -10    1.79    0.98
  14   3  10    1.05    1.05
  14  -3 -10    1.56    1.04
  14   3 -11   -0.16    0.88
  14  -3 -11    1.41    0.92
  15   3   0   -0.26    0.66
  15  -3   1    0.42    0.89
  15  -3  -1    2.83    0.88
  15   3   1    1.65    0.83
  15  -3   2    1.61    0.85
 -15   3  -2    1.30    0.66
  15  -3  -2    1.33    0.81
  15   3   2    0.78    0.79
  15  -3   3    1.42    0.74
  15  -3  -3    1.29    0.78
  15   3   3   -0.19    0.70
 -15   3  -3    0.54    0.65
  15   3  -4    0.27    0.86
  15  -3  -4    1.98    0.85
 -15   3  -4    0.41    0.69
  15   3  -5   -0.23    1.00
  15  -3   5    2.19    0.80
  15  -3  -5    2.43    0.91
 -15   3  -5    1.13    0.91
  15  -3   6    0.29    0.58
  15  -3  -6    0.41    0.76
 -15   3  -6   -0.11    0.60
  15  -3   7    1.65    0.82
  15   3  -7    0.88    0.98
  15  -3  -7    0.93    1.04
 -15   3  -7    1.47    0.98
  15  -3   8    2.05    0.81
  15   3  -8    0.08    0.88
  15  -3  -8    0.82    0.97
 -15   3  -8   -0.13    1.00
  15   3   8    2.31    0.98
  15   3  -9    0.23    0.90
  15  -3   9    1.47    0.63
  15  -3  -9    0.07    0.92
 -15   3  -9   -0.60    0.87
  16  -3   0    1.12    0.92
  16   3   0    1.39    0.91
  16  -3  -1    0.12    0.96
  16   3   1    2.90    0.93
  16  -3   2    1.88    1.02
  16   3   2    1.62    0.96
  16  -3   3   -0.20    0.84
  16   3  -3    1.08    0.89
  16  -3  -3    1.19    0.84
  16   3  -4    1.12    1.15
  16  -3   4    3.10    1.07
  16   3  -5    1.96    1.02
  16  -3   5    1.43    0.86
  16  -3  -5   -0.06    1.05
  16   3  -6   -0.21    0.99
  16  -3   6    1.21    0.82
 -16   3  -6    0.76    0.86
 -16   3  -7   -0.06    0.67
   0  -4   0  117.25    2.49
   0   4   0  120.53    2.75
   0   4  -1    0.03    0.12
   0  -4   1    0.03    0.10
   0   4   1    0.07    0.14
   0  -4  -1    0.07    0.11
   0   4  -2  135.02    2.98
   0   4  -2  135.23    3.22
   0   4   2  130.90    3.06
   0   4  -3    0.02    0.16
   0   4  -3    0.21    0.19
   0   4   3    0.35    0.19
   0  -4  -3    0.18    0.08
   0   4  -4   40.81    1.42
   0   4  -4   38.95    1.27
   0   4   4   40.64    1.43
   0  -4  -4   41.20    0.87
   0   4  -5   -0.13    0.16
   0   4  -5   -0.11    0.13
   0   4   5    0.55    0.15
   0  -4  -5   -0.05    0.06
   0   4   6    6.13    0.56
   0   4  -6    7.01    0.50
   0   4  -6    6.71    0.63
   0  -4  -6    6.39    0.25
   0  -4  -7    0.24    0.09
   0   4  -7    0.00    0.23
   0   4  -7    0.23    0.30
   0   4   7    0.85    0.30
   0  -4  -8    0.29    0.12
   0   4   8    0.77    0.33
   0   4  -8    0.50    0.33
   0   4  -8    0.21    0.25
   0   4   9    0.07    0.30
   0   4  -9   -0.08    0.30
   0   4  -9   -0.14    0.24
   0  -4  -9    0.11    0.09
   0   4 -10    8.75    0.80
   0   4  10    7.60    0.83
   0   4 -10    8.52    0.90
   0  -4 -10    8.05    0.36
   0   4  11    0.17    0.30
   0   4 -11   -0.10    0.28
   0   4 -11    0.01    0.31
   0   4 -12   10.64    1.04
   0   4  12   11.68    1.09
   0   4 -12    9.79    1.03
   0   4 -13    0.05    0.41
   0   4 -13    0.16    0.44
   0   4  14    2.27    0.74
   0   4 -14    3.00    0.78
   0   4 -14    2.53    0.77
   0   4  15    0.58    0.48
   0   4 -15   -0.31    0.48
   0   4  16    0.90    0.68
   0   4 -16    1.42    0.65
   0   4 -16    1.35    0.59
   0   4  17    0.18    0.62
   0   4 -17    0.38    0.49
   0   4 -17    0.25    0.48
   0   4  18    1.93    0.70
   0   4  18    0.08    0.70
   0  -4  18    0.11    0.77
   0   4  19    3.92    1.05
   1   4   0   23.09    0.77
   1   4   0   22.85    0.78
   1  -4   0   23.67    0.78
  -1   4   0   22.31    0.83
   1   4  -1    5.16    0.34
   1   4  -1    5.42    0.38
  -1   4   1    5.94    0.41
   1  -4   1    5.19    0.37
   1   4   1    4.95    0.36
   1  -4  -1    5.18    0.32
  -1   4  -1    5.17    0.37
   1   4   1    5.42    0.27
  -1   4   2   13.70    0.61
   1  -4   2   13.55    0.65
   1   4  -2   13.65    0.66
   1   4  -2   13.19    0.55
  -1  -4  -2   14.04    0.42
   1   4   2   14.31    0.66
   1  -4  -2   13.95    0.51
  -1   4  -2   13.44    0.63
   1   4  -3   18.21    0.65
   1   4  -3   17.71    0.83
  -1  -4  -3   18.34    0.46
  -1   4   3   17.14    0.72
   1  -4   3   17.75    0.77
   1   4   3   17.93    0.82
  -1   4  -3   18.02    0.79
   1   4  -4    6.63    0.40
   1   4  -4    7.23    0.57
  -1  -4  -4    6.40    0.20
  -1   4   4    6.61    0.50
   1  -4   4    6.37    0.43
   1   4   4    6.61    0.46
   1  -4  -4    7.30    0.31
  -1   4  -4    6.78    0.48
   1   4  -5   16.58    0.71
   1   4  -5   17.30    0.92
  -1   4   5   16.52    0.84
  -1  -4  -5   15.88    0.32
   1   4   5   17.35    0.91
   1  -4  -5   17.41    0.55
  -1   4  -5   17.60    0.85
   1   4  -6    8.80    0.51
   1   4  -6    9.12    0.68
  -1  -4  -6   10.18    0.24
  -1   4   6    9.03    0.66
   1  -4  -6    8.69    0.39
  -1   4  -6    8.87    0.63
  -1   4  -6    9.04    0.64
   1   4   6   10.42    0.75
   1   4  -7    1.32    0.29
   1   4  -7    1.61    0.43
  -1   4   7    1.21    0.29
   1  -4  -7    1.46    0.20
  -1   4  -7    1.80    0.40
  -1   4  -7    1.39    0.35
   1   4   7    1.39    0.40
   1   4  -8   -0.07    0.19
   1   4  -8    0.08    0.32
  -1   4   8    0.12    0.27
   1  -4  -8    0.38    0.14
  -1   4  -8    0.11    0.25
  -1   4  -8    0.18    0.31
   1   4   8    0.18    0.30
   1   4  -9    6.77    0.59
   1   4  -9    6.85    0.79
  -1   4   9    7.66    0.74
   1  -4  -9    6.39    0.40
  -1   4  -9    6.43    0.70
  -1   4  -9    7.35    0.77
   1   4   9    6.22    0.73
   1   4 -10    0.80    0.45
   1   4 -10    0.38    0.36
  -1   4  10    0.68    0.44
   1   4  10    0.81    0.35
   1  -4 -10    0.87    0.21
  -1   4 -10    0.37    0.43
  -1   4 -10    0.98    0.42
   1   4 -11    2.04    0.44
   1   4 -11    2.09    0.61
  -1   4  11    2.00    0.58
   1  -4 -11    1.72    0.27
  -1   4 -11    2.36    0.59
  -1   4 -11    2.06    0.56
   1   4  11    1.95    0.56
   1   4 -12    3.13    0.62
   1   4 -12    3.81    0.74
  -1   4  12    3.78    0.75
  -1   4 -12    3.53    0.75
   1   4  12    2.95    0.72
  -1   4 -12    3.67    0.71
   1   4 -13    2.44    0.63
   1   4 -13    3.17    0.79
  -1   4  13    3.23    0.68
  -1   4 -13    2.79    0.67
  -1   4 -13    3.51    0.66
   1   4  13    3.15    0.76
   1   4 -14    2.61    0.68
   1   4 -14    2.32    0.75
  -1   4  14    1.93    0.66
   1   4  14    1.21    0.73
  -1   4 -14    2.70    0.80
   1   4 -15    0.05    0.43
   1   4 -15    0.37    0.33
   1  -4  15   -0.32    0.38
  -1   4 -15   -0.11    0.42
   1   4  15    0.03    0.42
   1   4 -16    0.07    0.70
   1   4 -16    2.80    0.53
  -1   4  16   -0.45    0.71
   1  -4  16    0.59    0.59
   1   4  16    2.03    0.69
  -1   4 -16   -0.25    0.69
   1   4 -17    2.95    0.74
  -1   4  17    1.30    0.79
   1   4  17    0.28    0.77
  -1   4 -17    0.95    0.76
   1   4 -18    0.73    0.76
  -1   4  18    1.82    0.74
  -1   4 -18    0.58    0.61
   1   4  18   -0.12    0.74
   1  -4  19    0.73    1.01
   1   4  19    2.44    0.96
   2  -4   0   62.49    1.68
  -2   4   0   59.73    1.66
   2   4   0   61.57    1.57
   2   4   0   62.41    1.60
   2   4  -1   55.79    1.63
  -2   4   1   56.78    1.60
   2  -4   1   57.17    1.65
   2   4  -1   54.29    1.40
   2  -4  -1   58.82    1.56
  -2   4  -1   56.49    1.66
   2   4   1   57.75    1.38
   2   4   1   58.82    1.63
   2  -4   2   15.88    0.73
  -2   4   2   15.98    0.74
   2   4  -2   15.29    0.55
   2   4  -2   15.78    0.75
  -2   4  -2   15.78    0.73
   2  -4  -2   15.65    0.62
   2   4   2   16.58    0.50
   2   4   2   16.08    0.74
  -2   4   3   13.38    0.69
   2  -4   3   13.80    0.72
   2   4  -3   13.76    0.76
   2   4  -3   13.64    0.51
   2  -4  -3   13.34    0.54
  -2   4  -3   13.08    0.69
   2   4   3   13.94    0.70
   2   4  -4   17.25    0.61
   2   4  -4   17.08    0.92
   2  -4   4   16.79    0.86
  -2   4   4   16.14    0.78
  -2  -4  -4   17.04    0.35
   2  -4  -4   18.33    0.67
  -2   4  -4   17.00    0.86
   2   4   4   17.07    0.85
   2   4  -5    1.10    0.17
   2   4  -5    1.43    0.37
   2  -4   5    1.45    0.27
  -2   4   5    1.25    0.30
   2   4   5    1.19    0.34
  -2   4  -5    1.80    0.34
   2   4  -6    0.89    0.35
   2   4  -6    0.34    0.17
  -2   4   6    1.10    0.29
   2  -4   6    0.90    0.31
   2  -4  -6    0.65    0.17
  -2   4  -6    0.80    0.26
   2   4   6    0.17    0.32
   2   4  -7    7.04    0.70
  -2   4   7    7.33    0.61
   2  -4   7    6.30    0.61
   2   4  -7    6.21    0.41
  -2   4  -7    6.58    0.64
   2   4   7    6.74    0.66
   2  -4  -7    6.97    0.40
  -2   4   8    2.09    0.40
   2   4  -8    2.62    0.31
   2  -4   8    2.18    0.44
   2   4  -8    2.98    0.53
   2  -4  -8    2.49    0.30
  -2   4  -8    2.09    0.46
   2   4   8    2.29    0.52
   2   4  -9    2.33    0.34
   2  -4   9    1.79    0.48
   2   4  -9    2.41    0.56
   2  -4  -9    2.19    0.28
  -2   4  -9    2.42    0.52
   2   4   9    2.48    0.54
   2   4 -10   11.76    1.09
   2  -4  10   10.65    0.94
   2   4 -10   12.13    0.80
  -2   4  10   11.48    0.90
   2  -4 -10   11.15    0.69
   2   4  10   11.36    1.06
  -2   4 -10   11.61    1.06
  -2   4  11    1.78    0.51
   2   4 -11    2.14    0.45
   2   4 -11    2.44    0.62
   2  -4  11    1.62    0.53
   2  -4 -11    1.55    0.33
   2   4  11    1.74    0.61
  -2   4 -11    1.24    0.58
   2   4 -12    2.01    0.45
   2   4 -12    1.82    0.64
   2  -4  12    1.71    0.56
  -2   4  12    1.72    0.53
  -2   4 -12    2.19    0.62
   2   4  12    1.70    0.66
   2  -4 -12    1.54    0.29
  -2   4  13    1.12    0.49
   2   4 -13    1.29    0.55
   2   4 -13    1.09    0.68
   2  -4  13    2.07    0.60
   2   4  13    2.17    0.70
   2  -4 -13    1.34    0.32
  -2   4 -13    1.86    0.63
  -2   4  14   -0.10    0.35
   2   4 -14    0.20    0.40
   2  -4  14    0.00    0.31
  -2   4 -14   -0.16    0.43
   2   4  14    0.25    0.43
   2   4 -15    1.32    0.72
   2   4 -15    2.15    0.48
   2  -4  15    1.44    0.55
  -2   4  15    1.02    0.53
   2   4  15    0.98    0.73
  -2   4 -15    0.29    0.78
  -2   4  16    2.07    0.62
   2   4 -16    0.18    0.75
   2  -4  16    1.68    0.55
  -2   4 -16    1.22    0.75
   2   4  16    0.14    0.76
   2   4 -17    1.58    0.75
   2  -4  17    1.39    0.64
   2   4  17    0.11    0.74
  -2   4 -17    1.06    0.66
   2   4 -18    0.73    0.70
  -2   4  18    0.32    0.62
   2  -4  18    1.00    0.60
   2   4  18   -0.01    0.72
  -2   4 -18   -0.39    0.69
   2  -4  19   -0.15    0.92
   2   4  19    1.26    0.84
   3  -4   0   18.23    0.81
  -3   4   0   18.40    0.82
   3   4   0   18.62    0.77
   3   4   0   18.85    0.69
  -3   4   1   11.91    0.64
   3  -4   1   12.29    0.69
   3   4  -1   11.76    0.50
   3   4  -1   11.62    0.67
   3  -4  -1   11.98    0.63
  -3   4  -1   12.04    0.68
   3   4   1   12.41    0.62
   3   4   1   12.40    0.54
   3   4  -2   15.14    0.83
  -3   4   2   15.47    0.74
   3  -4   2   15.65    0.79
   3   4   2   14.57    0.73
   3  -4  -2   14.88    0.70
  -3   4  -2   14.80    0.72
   3   4   2   15.94    0.59
   3   4  -3   62.71    1.46
  -3   4   3   70.63    2.07
   3  -4   3   66.12    2.10
   3   4  -3   67.96    2.30
   3   4   3   71.84    2.24
   3   4   3   67.38    1.35
   3  -4  -3   67.53    1.89
  -3   4  -3   66.27    2.10
   3   4  -4    0.47    0.13
  -3   4   4    0.44    0.24
   3  -4   4    0.45    0.28
   3   4  -4    0.34    0.30
   3   4   4    0.71    0.25
   3  -4  -4    0.39    0.21
  -3   4  -4    1.08    0.28
   3   4   4    0.30    0.08
   3   4  -5   12.45    0.90
   3   4  -5   12.25    0.51
  -3   4   5   12.44    0.71
   3  -4   5   12.16    0.77
   3  -4  -5   13.17    0.66
  -3   4  -5   13.07    0.82
   3   4   5   11.73    0.72
   3   4  -6    1.42    0.19
  -3   4   6    1.38    0.29
   3  -4   6    1.22    0.36
   3   4  -6    1.14    0.44
   3   4   6    1.44    0.34
   3  -4  -6    1.05    0.28
  -3   4  -6    1.23    0.38
   3   4  -7    1.25    0.49
  -3   4   7    1.23    0.34
   3  -4   7    1.55    0.39
   3   4  -7    1.15    0.20
   3   4   7    1.49    0.44
   3  -4  -7    1.60    0.25
  -3   4  -7    1.25    0.40
   3   4  -8    9.15    0.53
   3   4  -8    9.79    0.99
  -3   4   8   10.23    0.69
   3  -4   8    9.05    0.79
   3   4   8   10.38    0.89
   3  -4  -8    7.21    0.55
  -3   4  -8    9.90    0.82
   3   4  -9    2.44    0.31
   3   4  -9    1.84    0.62
  -3   4   9    1.31    0.44
   3  -4   9    1.21    0.47
   3   4   9    1.06    0.54
  -3   4  -9    1.73    0.53
   3   4 -10    1.35    0.63
  -3   4  10    1.29    0.45
   3  -4  10    1.60    0.49
   3   4 -10    1.31    0.31
   3   4  10    1.76    0.55
   3  -4 -10    1.38    0.29
  -3   4 -10    1.67    0.56
   3   4 -11    2.05    0.70
  -3   4  11    1.77    0.55
   3  -4  11    2.65    0.55
   3   4 -11    2.23    0.39
   3   4  11    2.88    0.68
   3  -4 -11    2.70    0.39
  -3   4 -11    2.81    0.66
   3   4 -12    4.52    0.90
   3   4 -12    4.75    0.57
  -3   4  12    3.80    0.74
   3  -4  12    5.58    0.81
   3   4  12    4.97    0.89
   3  -4 -12    4.36    0.53
  -3   4 -12    4.83    0.89
   3   4 -13    3.27    0.50
  -3   4  13    2.74    0.69
   3   4 -13    3.52    0.84
   3  -4  13    3.15    0.76
   3   4  13    3.75    0.73
   3  -4 -13    2.65    0.46
  -3   4 -13    4.01    0.82
   3   4 -14    0.72    0.63
   3   4 -14    0.25    0.35
  -3   4  14    1.22    0.46
   3  -4  14    0.79    0.48
   3   4  14    1.12    0.64
  -3   4 -14    1.26    0.69
   3   4 -15    1.01    0.73
   3  -4  15    0.98    0.61
   3   4  15    0.58    0.75
  -3   4 -15    2.23    0.78
  -3   4  16    0.53    0.53
   3   4 -16    1.68    0.74
  -3   4 -16    1.10    0.75
   3   4 -17    0.10    0.72
   3   4  17   -0.38    0.72
  -3   4 -17    1.76    0.71
   3   4 -18    1.37    0.97
  -3   4  18    5.22    0.83
   3   4  18   -0.13    1.06
  -3   4 -18    1.22    1.00
   3   4 -19    0.55    0.91
   3   4  19    1.66    0.94
   4   4   0    6.82    0.44
   4   4   0    6.42    0.47
   4  -4   0    7.12    0.58
  -4   4   0    5.91    0.55
  -4   4   1   63.85    1.93
   4  -4   1   63.30    2.06
   4   4  -1   62.26    2.04
   4   4   1   62.37    1.76
   4  -4  -1   63.40    1.97
  -4   4  -1   65.15    2.09
   4   4   1   61.85    1.80
   4   4  -2   14.66    0.90
   4   4  -2   15.44    0.54
  -4   4   2   15.29    0.79
   4  -4   2   15.84    0.87
   4   4   2   15.38    0.63
   4   4   2   16.30    0.80
   4  -4  -2   15.30    0.82
  -4   4  -2   16.46    0.87
   4   4  -3    4.24    0.27
   4   4  -3    4.23    0.53
  -4   4   3    4.72    0.45
   4  -4   3    4.24    0.51
   4   4   3    4.26    0.47
   4   4   3    4.75    0.28
   4  -4  -3    4.44    0.46
  -4   4  -3    5.33    0.53
   4   4  -4   16.88    1.04
   4   4  -4   16.09    0.54
  -4   4   4   16.70    0.84
   4  -4   4   14.99    0.91
   4   4   4   16.10    0.48
   4   4   4   15.53    0.88
   4  -4  -4   16.17    0.84
  -4   4  -4   16.63    0.98
   4   4  -5    6.34    0.32
   4   4  -5    6.49    0.71
  -4   4   5    6.08    0.51
   4  -4   5    6.48    0.59
   4   4   5    6.01    0.20
   4   4   5    6.40    0.54
   4  -4  -5    6.50    0.50
  -4   4  -5    6.28    0.64
   4   4  -6   20.67    0.68
  -4   4   6   21.29    1.02
   4  -4   6   21.55    1.13
   4   4  -6   20.53    1.31
   4   4   6   19.80    1.20
   4  -4  -6   21.04    1.03
  -4   4  -6   20.37    1.20
   4   4  -7    3.96    0.30
  -4   4   7    4.13    0.48
   4  -4   7    4.58    0.56
   4   4  -7    3.70    0.68
   4   4   7    3.92    0.53
   4  -4  -7    4.25    0.48
  -4   4  -7    4.73    0.60
   4   4  -8    4.31    0.38
   4   4  -8    4.04    0.62
  -4   4   8    4.69    0.48
   4  -4   8    4.26    0.60
   4   4   8    4.30    0.70
   4  -4  -8    4.14    0.45
  -4   4  -8    4.12    0.68
   4   4  -9    1.02    0.51
  -4   4   9    0.61    0.31
   4   4  -9    0.78    0.21
   4  -4   9    1.73    0.41
   4   4   9    0.86    0.51
   4  -4  -9    0.55    0.33
  -4   4  -9    0.73    0.48
   4   4 -10   14.85    1.46
   4   4 -10   13.58    0.72
  -4   4  10   15.12    1.03
   4  -4  10   14.63    1.03
   4  -4 -10   14.81    0.93
  -4   4 -10   14.02    1.18
   4   4  10   14.98    1.34
   4   4 -11    3.02    0.43
   4   4 -11    1.78    0.81
  -4   4  11    1.29    0.49
   4  -4  11    2.86    0.59
   4   4  11    2.92    0.75
   4  -4 -11    1.99    0.48
  -4   4 -11    3.19    0.71
   4   4 -12    1.59    0.63
   4   4 -12    0.21    0.27
  -4   4  12    0.05    0.41
   4  -4  12    0.15    0.46
   4   4  12    1.25    0.57
   4  -4 -12    0.98    0.34
  -4   4 -12    0.73    0.55
   4   4 -13    1.69    0.63
   4   4 -13    0.66    0.29
  -4   4  13    0.54    0.46
   4  -4  13    0.79    0.51
  -4   4 -13    0.93    0.63
   4   4  13    0.87    0.65
   4   4 -14    0.67    0.63
   4  -4  14    0.83    0.43
   4   4  14   -0.41    0.65
   4  -4 -14    0.73    0.35
  -4   4 -14    0.35    0.65
   4   4 -15    0.31    0.63
  -4   4  15    0.37    0.49
   4  -4  15    0.88    0.51
   4   4  15   -0.14    0.64
  -4   4 -15    0.73    0.72
   4   4 -16    1.09    0.74
   4  -4  16    1.68    0.52
   4   4  16   -0.47    0.77
  -4   4 -16    0.13    0.79
   4   4 -17    3.76    0.89
  -4   4  17    0.00    0.70
   4  -4  17    1.14    0.61
   4   4  17    0.36    0.92
  -4   4 -17    4.28    0.93
   4   4 -18   -0.35    0.90
   4   4  18    1.46    0.96
  -4   4 -18    2.44    0.93
   4   4  19    2.58    1.17
  -4   4 -19    1.99    1.16
   5   4   0   32.06    1.07
  -5   4   0   31.91    1.34
   5   4   0   32.03    1.32
   5  -4   0   32.54    1.42
   5   4  -1   16.02    0.60
  -5   4   1   15.75    0.87
   5  -4   1   15.63    0.99
   5   4  -1   14.96    0.87
   5   4   1   15.95    0.79
   5   4   1   15.88    0.81
  -5   4  -1   15.37    0.90
   5  -4  -1   15.16    0.92
   5   4  -2   65.26    1.57
   5   4  -2   61.77    2.31
  -5   4   2   63.88    2.04
   5  -4   2   60.49    2.20
   5   4   2   61.33    1.75
   5  -4  -2   62.51    2.20
  -5   4  -2   63.25    2.26
   5   4   2   60.32    1.93
   5  -4   3    2.80    0.49
   5   4  -3    2.76    0.22
   5   4  -3    2.67    0.53
  -5   4   3    2.76    0.39
   5   4   3    2.98    0.25
   5   4   3    2.77    0.42
   5  -4  -3    3.50    0.46
  -5   4   4    5.55    0.48
   5   4  -4    6.04    0.65
   5  -4   4    5.45    0.59
   5   4  -4    5.66    0.27
   5   4   4    5.43    0.59
   5   4   4    5.21    0.31
   5  -4  -4    5.38    0.57
  -5   4  -4    5.02    0.61
   5  -4   5    7.98    0.72
   5   4  -5    8.01    0.31
   5   4  -5    7.91    0.82
  -5   4   5    7.51    0.53
   5   4   5    7.23    0.30
   5   4   5    7.82    0.74
  -5   4  -5    7.45    0.75
   5  -4  -5    8.30    0.67
   5   4  -6   18.02    1.26
   5   4  -6   17.71    0.54
  -5   4   6   19.69    0.91
   5  -4   6   17.81    1.10
   5   4   6   16.40    0.42
  -5   4  -6   18.95    1.17
   5  -4  -6   17.53    1.05
   5   4   6   19.85    1.14
   5  -4   7    4.59    0.60
   5   4  -7    4.92    0.75
   5   4  -7    4.43    0.28
  -5   4   7    4.34    0.43
   5   4   7    4.92    0.62
   5  -4  -7    4.32    0.57
  -5   4  -7    4.09    0.67
   5  -4   8    7.46    0.75
  -5   4   8    7.44    0.61
   5   4  -8    7.27    0.38
   5   4  -8    7.41    0.94
   5   4   8    7.67    0.90
  -5   4  -8    6.95    0.75
   5  -4  -8    7.51    0.72
  -5   4   9   20.99    1.07
   5   4  -9   21.33    1.66
   5   4  -9   19.60    0.76
   5  -4   9   22.25    1.36
  -5   4  -9   21.30    1.59
   5   4   9   20.89    1.45
   5  -4  -9   23.03    1.37
   5  -4  10    0.35    0.41
  -5   4  10    0.34    0.33
   5   4 -10    0.28    0.53
   5   4  10    0.33    0.43
  -5   4 -10   -0.25    0.51
   5  -4 -10    1.03    0.39
   5  -4  11    2.77    0.55
   5   4 -11    3.69    0.83
  -5   4  11    2.49    0.46
   5   4  11    2.02    0.84
   5  -4 -11    2.20    0.59
  -5   4 -11    3.81    0.78
   5  -4  12    0.71    0.55
   5   4 -12    1.61    0.73
  -5   4  12    1.08    0.46
   5   4  12    2.12    0.71
   5  -4 -12    1.14    0.46
  -5   4 -12    1.52    0.70
   5  -4  13    0.13    0.47
   5   4 -13    1.06    0.61
  -5   4 -13    0.32    0.56
   5  -4 -13    0.27    0.44
   5   4  13    0.27    0.58
   5  -4  14    0.07    0.50
   5   4 -14    0.42    0.69
   5   4  14    1.46    0.67
  -5   4 -14   -0.04    0.70
   5  -4 -14    0.81    0.49
   5  -4  15    1.23    0.53
   5   4 -15    1.31    0.73
  -5   4  15    0.87    0.46
   5   4  15    0.60    0.75
  -5   4 -15    2.03    0.82
   5  -4 -15    0.27    0.42
   5   4 -16    0.65    0.78
  -5   4  16    0.88    0.59
   5   4  16    1.62    0.66
  -5   4 -16    0.76    0.85
   5   4 -17   -0.34    0.64
   5   4  17    0.36    0.66
  -5   4 -17    0.47    0.68
   5   4 -18   -0.25    0.72
   5   4  18    1.00    0.87
  -5   4 -18    1.30    0.85
  -6   4   0   14.44    0.82
   6   4   0   14.26    0.88
   6  -4   0   14.26    0.95
   6  -4   1    7.49    0.74
   6   4  -1    8.44    0.72
   6   4  -1    7.74    0.41
  -6   4   1    7.76    0.64
   6  -4  -1    7.87    0.75
  -6   4  -1    7.68    0.71
   6   4   1    7.44    0.56
   6   4   1    8.57    0.58
   6   4  -2   15.14    0.57
  -6   4   2   16.00    0.86
   6  -4   2   14.65    1.00
   6   4  -2   15.88    1.01
   6  -4  -2   13.98    0.97
  -6   4  -2   14.30    0.96
   6   4   2   13.84    0.71
   6   4   2   13.55    0.79
   6   4  -3   24.93    0.70
   6   4  -3   24.15    1.38
  -6   4   3   24.11    1.09
   6  -4   3   24.47    1.30
  -6   4  -3   24.34    1.35
   6  -4  -3   23.70    1.28
   6   4   3   22.39    0.87
   6   4   3   23.23    1.20
  -6   4   4   10.76    0.67
   6   4  -4   10.50    0.94
   6   4  -4   10.50    0.36
   6  -4   4   10.12    0.74
   6  -4  -4   11.29    0.83
  -6   4  -4   10.99    0.86
   6   4   4   10.04    0.82
   6   4   4   10.06    0.48
   6   4  -5    2.48    0.55
   6   4  -5    2.11    0.15
  -6   4   5    2.49    0.33
   6  -4   5    2.29    0.49
   6  -4  -5    2.52    0.49
   6   4   5    1.90    0.22
   6   4   5    2.01    0.52
  -6   4  -5    2.56    0.52
   6   4  -6    7.22    0.75
  -6   4   6    7.51    0.53
   6  -4   6    8.06    0.75
  -6   4  -6    7.89    0.81
   6  -4  -6    8.50    0.80
   6   4   6    6.40    0.31
   6   4   6    8.24    0.84
  -6   4   7    2.88    0.40
   6  -4   7    3.26    0.56
   6   4  -7    1.64    0.64
   6  -4  -7    2.33    0.56
   6   4   7    3.22    0.65
  -6   4  -7    3.02    0.53
  -6   4   8    0.41    0.25
   6   4  -8    0.80    0.48
   6  -4   8    0.15    0.39
   6  -4  -8    0.21    0.39
  -6   4  -8    0.84    0.46
   6   4   8    0.14    0.38
   6   4  -9    4.22    0.98
  -6   4   9    5.80    0.58
   6  -4   9    4.68    0.79
   6  -4  -9    6.67    0.83
   6   4   9    5.63    0.94
  -6   4  -9    5.79    0.93
   6   4 -10    0.39    0.61
  -6   4  10    0.53    0.31
   6  -4  10    0.99    0.40
  -6   4 -10    1.85    0.57
   6  -4 -10    0.12    0.39
   6   4  10    0.10    0.58
  -6   4  11    1.09    0.36
   6  -4  11    0.86    0.53
   6   4 -11    0.87    0.56
   6  -4 -11    1.16    0.46
   6   4  11    1.09    0.55
  -6   4 -11    1.41    0.68
   6   4 -12    0.87    0.52
  -6   4  12    0.49    0.32
   6  -4  12    0.80    0.46
  -6   4 -12    0.31    0.60
   6  -4 -12    0.36    0.44
   6   4  12    0.67    0.62
   6  -4  13   -0.15    0.43
   6   4 -13    0.11    0.57
   6  -4 -13    0.80    0.40
   6   4  13    0.05    0.55
  -6   4 -13    0.06    0.45
   6   4 -14    0.22    0.84
  -6   4  14    1.11    0.40
  -6   4 -14    1.41    0.79
   6   4  14    1.01    0.76
   6   4 -15    1.25    0.91
   6  -4  15    1.43    0.55
   6   4  15    1.18    0.84
   6  -4 -15    1.20    0.62
  -6   4 -15    1.39    0.90
   6   4 -16    2.17    0.89
  -6   4 -16    1.14    0.91
   6   4  16    1.10    0.75
   6   4 -17    0.20    0.93
   6   4  17    1.71    0.97
  -6   4 -17    2.06    0.97
   6   4 -18    0.20    1.08
   6   4  18    3.78    1.11
  -6   4 -18    1.90    1.08
   7   4   0   25.50    1.29
   7   4   0   21.03    0.88
  -7   4   0   27.21    1.29
   7  -4   0   26.73    1.31
  -7   4   1   31.27    1.40
   7   4  -1   30.58    1.02
   7   4  -1   31.84    1.56
   7  -4   1   30.81    1.56
   7   4   1   29.26    1.13
   7  -4  -1   32.22    1.64
  -7   4  -1   31.33    1.51
   7   4   1   31.89    1.42
   7   4  -2   11.45    0.96
   7   4  -2   11.79    0.50
  -7   4   2   10.89    0.76
   7  -4   2   10.71    0.92
   7   4   2   11.10    0.67
   7   4   2   10.44    0.74
   7  -4  -2   11.13    0.95
  -7   4  -2   12.25    0.95
   7   4  -3    1.76    0.17
   7   4  -3    1.96    0.53
   7  -4   3    1.50    0.49
  -7   4   3    2.27    0.38
   7   4   3    1.36    0.29
   7   4   3    2.08    0.43
   7  -4  -3    2.41    0.50
  -7   4  -3    1.63    0.49
   7   4  -4    3.15    0.18
   7   4  -4    2.57    0.66
  -7   4   4    3.77    0.41
   7  -4   4    3.29    0.59
   7   4   4    3.02    0.32
   7   4   4    3.90    0.51
   7  -4  -4    4.91    0.59
  -7   4  -4    4.30    0.61
  -7   4   5    2.85    0.36
   7  -4   5    3.05    0.56
   7   4  -5    3.17    0.64
   7   4   5    2.42    0.26
   7   4   5    3.03    0.57
  -7   4  -5    2.08    0.58
   7  -4  -5    2.17    0.50
   7   4  -6    5.89    0.77
   7  -4   6    6.60    0.74
  -7   4   6    5.72    0.49
   7   4   6    5.39    0.36
   7   4   6    7.38    0.85
  -7   4  -6    6.13    0.80
   7  -4  -6    6.31    0.82
   7   4  -7    0.99    0.61
   7  -4   7    1.27    0.47
  -7   4   7    0.94    0.28
   7   4   7    0.75    0.55
  -7   4  -7    1.30    0.55
   7  -4  -7    0.85    0.51
   7   4  -8    0.43    0.50
   7  -4   8    0.18    0.40
  -7   4   8   -0.07    0.23
   7   4   8    0.35    0.47
  -7   4  -8    1.35    0.48
   7  -4  -8    0.35    0.42
   7  -4   9   14.84    1.15
  -7   4   9   14.63    0.95
   7   4  -9   14.18    1.51
   7   4   9   14.80    1.51
   7  -4  -9   13.83    1.25
  -7   4  -9   14.57    1.48
   7   4 -10    2.72    0.84
   7  -4  10    2.30    0.57
  -7   4  10    2.71    0.43
   7   4  10    3.44    0.85
  -7   4 -10    2.25    0.80
   7  -4 -10    1.85    0.74
   7   4 -11   -0.09    0.57
   7  -4  11   -0.04    0.43
  -7   4  11    0.51    0.26
   7   4  11    0.12    0.58
  -7   4 -11    0.10    0.54
   7  -4 -11    0.48    0.45
   7   4 -12    0.25    0.67
  -7   4  12    0.26    0.29
   7  -4  12    1.59    0.48
   7   4  12    0.19    0.63
  -7   4 -12    0.20    0.49
   7  -4 -12    0.53    0.43
   7   4 -13   -0.01    0.65
   7  -4  13   -0.04    0.49
  -7   4  13    0.17    0.32
   7   4  13    0.19    0.52
   7  -4 -13    1.21    0.54
  -7   4 -13    1.19    0.61
   7   4 -14   -0.51    0.73
   7  -4  14    0.71    0.47
   7   4  14    0.48    0.71
   7  -4 -14    1.01    0.60
   7  -4  15    0.96    0.57
   7   4  15   -0.50    0.75
  -7   4 -15    1.85    0.81
   7  -4 -15    0.25    0.68
   7   4 -16    2.39    1.06
   7   4  16    2.21    1.02
  -7   4 -16    0.90    1.06
   8  -4   0    0.06    0.39
   8   4   0    0.46    0.20
   8   4   0    0.72    0.31
  -8   4   0    0.12    0.33
   8   4  -1    2.50    0.29
   8   4  -1    2.31    0.54
   8  -4   1    2.90    0.58
  -8   4   1    2.60    0.41
   8   4   1    2.10    0.47
   8   4   1    2.24    0.32
   8  -4  -1    3.01    0.59
  -8   4  -1    2.51    0.53
   8   4  -2    3.33    0.64
   8   4  -2    3.37    0.27
  -8   4   2    3.16    0.42
   8  -4   2    3.47    0.63
   8   4   2    3.36    0.49
   8   4   2    3.33    0.43
   8  -4  -2    3.30    0.54
  -8   4  -2    3.30    0.58
   8   4  -3    3.90    0.25
   8   4  -3    3.99    0.74
   8  -4   3    3.96    0.67
  -8   4   3    4.71    0.50
   8   4   3    4.33    0.56
   8   4   3    3.97    0.45
  -8   4  -3    3.91    0.67
   8  -4  -3    3.71    0.67
  -8   4   4    2.19    0.35
   8   4  -4    2.20    0.64
   8  -4   4    2.67    0.56
   8   4   4    1.65    0.46
   8   4   4    1.85    0.33
   8  -4  -4    2.06    0.59
  -8   4  -4    1.79    0.58
   8   4  -5    1.07    0.47
  -8   4   5    1.13    0.30
   8  -4   5    1.18    0.49
   8   4   5    1.40    0.50
   8   4   5    1.22    0.30
   8  -4  -5    0.89    0.53
  -8   4  -5    0.68    0.50
   8   4  -6    0.99    0.60
  -8   4   6    0.54    0.31
   8  -4   6    1.12    0.50
   8   4   6    1.16    0.53
   8   4   6    1.02    0.26
   8  -4  -6    0.92    0.55
  -8   4  -6    1.35    0.55
   8   4  -7   12.04    1.33
   8  -4   7   11.42    1.05
  -8   4   7    9.90    0.67
   8   4   7    9.48    0.54
   8   4   7   11.02    1.20
   8  -4  -7   12.88    1.20
  -8   4  -7   12.62    1.22
   8   4  -8    0.34    0.63
  -8   4   8    0.58    0.30
   8  -4   8    0.52    0.47
   8   4   8    0.33    0.58
   8  -4  -8    1.52    0.55
  -8   4  -8    0.08    0.60
  -8   4   9    7.43    0.59
   8   4  -9    7.94    1.23
   8  -4   9    8.25    0.97
   8   4   9    7.60    1.19
   8  -4  -9    7.30    1.09
  -8   4  -9    7.20    1.18
   8   4 -10    0.43    0.62
  -8   4  10    0.34    0.24
   8  -4  10    0.20    0.45
   8   4  10    0.66    0.60
   8  -4 -10    0.49    0.55
  -8   4 -10    0.34    0.57
   8   4 -11    0.60    0.72
  -8   4  11    0.83    0.30
   8  -4  11    1.15    0.54
   8   4  11    0.45    0.70
   8  -4 -11    0.41    0.61
  -8   4 -11    1.57    0.68
   8   4 -12    0.31    0.56
   8  -4  12    0.53    0.53
   8   4  12   -0.17    0.57
   8  -4 -12    0.84    0.56
  -8   4 -12    2.23    0.67
   8   4 -13    0.01    0.81
   8  -4  13    1.31    0.61
   8   4  13    1.16    0.80
   8  -4 -13    1.05    0.62
  -8   4 -13    1.36    0.77
   8   4 -14    2.18    0.87
   8  -4  14    1.07    0.61
   8   4  14   -0.02    0.81
   8  -4 -14    0.60    0.77
  -8   4 -14    1.36    0.87
   8   4 -15    0.07    1.00
   8  -4  15    2.43    0.65
   8   4  15    1.73    0.99
   8  -4 -15    3.16    0.90
  -8   4 -15    0.72    0.86
   8   4 -16    1.69    0.91
   8   4  16   -0.07    0.85
  -8   4 -16    0.17    0.87
   8   4 -17    2.15    1.01
   8   4  17    0.41    0.91
  -8   4 -17   -0.53    0.93
   9  -4   0    0.16    0.43
   9   4   0    0.39    0.21
  -9   4   0    0.68    0.36
   9   4   0    0.40    0.39
   9  -4   1    4.70    0.78
   9   4  -1    4.18    0.37
  -9   4   1    4.73    0.64
   9   4  -1    5.44    0.74
   9   4   1    4.98    0.62
   9  -4  -1    4.23    0.78
  -9   4  -1    5.12    0.60
  -9   4   2    1.35    0.40
   9   4  -2    1.54    0.56
   9   4  -2    1.30    0.21
   9  -4   2    1.18    0.51
   9   4   2    1.16    0.39
   9   4   2    1.40    0.33
   9  -4  -2    0.92    0.54
  -9   4  -2    1.50    0.49
   9  -4   3    0.49    0.34
  -9   4   3    0.16    0.25
   9   4  -3    1.06    0.46
   9   4   3    0.13    0.28
   9   4   3    0.41    0.35
   9  -4  -3    0.72    0.43
  -9   4  -3    0.43    0.40
  -9   4   4    7.09    0.58
   9   4  -4    7.88    1.00
   9  -4   4    7.86    0.90
   9   4   4    6.95    0.62
   9   4   4    6.64    0.82
   9  -4  -4    6.99    0.96
  -9   4  -4    7.54    0.87
   9   4  -5    0.59    0.61
  -9   4   5    1.11    0.29
   9  -4   5    1.23    0.52
   9   4   5    0.45    0.28
   9   4   5    0.96    0.52
   9  -4  -5    1.64    0.59
  -9   4  -5    0.90    0.55
   9   4  -6    7.48    0.97
   9  -4   6    7.22    0.95
  -9   4   6    6.81    0.56
   9   4   6    6.06    0.50
   9   4   6    7.56    1.01
   9  -4  -6    7.26    0.90
  -9   4  -6    6.72    0.85
   9  -4   7    4.56    0.79
  -9   4   7    3.74    0.46
   9   4  -7    3.41    0.97
   9   4   7    3.69    0.39
   9   4   7    4.54    0.89
   9  -4  -7    5.49    0.94
  -9   4  -7    3.53    0.95
   9   4  -8    2.54    0.84
  -9   4   8    2.25    0.37
   9  -4   8    2.61    0.68
   9   4   8    2.84    0.81
   9  -4  -8    2.31    0.81
  -9   4  -8    2.58    0.82
   9  -4   9    1.06    0.51
   9   4  -9    0.95    0.65
  -9   4   9    0.41    0.27
   9   4   9    0.49    0.66
   9  -4  -9    1.47    0.68
  -9   4  -9    1.28    0.63
   9   4 -10    0.45    0.74
   9  -4  10    0.86    0.56
   9  -4 -10    1.49    0.72
   9   4  10    0.59    0.72
  -9   4 -10    1.81    0.71
   9  -4  11   -0.14    0.40
   9   4 -11    0.45    0.61
   9   4  11    0.16    0.60
   9  -4 -11   -0.27    0.54
  -9   4 -11    1.32    0.58
   9   4 -12    1.96    0.78
   9  -4  12    0.44    0.58
   9   4  12    0.83    0.74
   9  -4 -12    0.33    0.65
   9   4 -13    0.40    0.89
   9  -4  13    1.09    0.58
   9   4  13    1.47    0.87
   9  -4 -13    1.63    0.69
  -9   4 -13    1.51    0.90
   9   4 -14   -0.06    0.80
   9  -4  14    0.40    0.51
   9   4  14    1.83    0.79
   9  -4 -14    0.18    0.71
   9   4  15   -0.23    0.79
  -9   4 -15    1.09    0.85
   9   4 -16    0.44    0.88
  10   4   0    0.85    0.48
  10   4   0    0.61    0.23
 -10   4   0    0.63    0.41
  10  -4   0    0.59    0.50
  10   4  -1    2.69    0.59
  10   4  -1    1.53    0.26
 -10   4   1    1.76    0.48
  10  -4   1    1.36    0.51
  10   4   1    0.93    0.28
  10  -4  -1    1.59    0.58
 -10   4  -1    1.76    0.46
  10   4   1    1.79    0.48
  10   4  -2    0.65    0.51
 -10   4   2    0.55    0.33
  10  -4   2    1.14    0.52
  10  -4  -2    1.02    0.50
 -10   4  -2    0.92    0.37
  10   4   2    0.38    0.31
  10   4   2    0.39    0.39
  10   4  -3    8.00    1.04
 -10   4   3    6.73    0.66
  10  -4   3    7.79    0.85
  10   4   3    7.42    0.75
  10   4   3    7.40    0.81
 -10   4  -3    6.87    0.90
  10  -4  -3    7.08    0.99
  10   4  -4    0.31    0.52
 -10   4   4    0.05    0.26
  10  -4   4    0.40    0.48
  10   4   4    0.16    0.41
  10  -4  -4    0.95    0.50
 -10   4  -4    1.10    0.47
  10   4   4    0.05    0.33
  10   4  -5    0.35    0.59
 -10   4   5    0.70    0.27
  10  -4   5    0.37    0.53
  10   4   5    0.76    0.45
 -10   4  -5    0.90    0.56
  10  -4  -5    1.01    0.49
  10   4   5    0.59    0.31
  10  -4   6    1.23    0.60
 -10   4   6    1.13    0.31
  10   4  -6    1.60    0.73
 -10   4  -6    1.84    0.69
  10  -4  -6    1.12    0.69
  10   4   6    1.97    0.65
  10   4   6    1.15    0.34
  10   4  -7    2.29    0.81
 -10   4   7    1.72    0.34
  10  -4   7    2.23    0.63
  10   4   7    2.43    0.74
  10  -4  -7    1.30    0.79
 -10   4  -7    2.61    0.77
  10   4   7    1.60    0.32
  10  -4   8    0.26    0.52
  10   4  -8    0.11    0.62
  10  -4  -8    0.78    0.63
 -10   4  -8    1.50    0.61
  10   4   8    0.38    0.60
  10   4  -9    0.44    0.64
  10  -4   9    1.27    0.60
  10   4   9    1.07    0.74
 -10   4  -9    1.26    0.71
  10  -4  -9    1.86    0.78
  10   4 -10    1.76    0.86
  10  -4  10    0.79    0.64
  10   4  10    1.38    0.82
  10  -4 -10    1.05    0.86
 -10   4 -10    2.82    0.79
  10  -4  11    0.82    0.53
  10   4  11    1.30    0.77
  10  -4 -11    2.42    0.75
 -10   4 -11   -0.26    0.62
  10  -4  12    0.84    0.63
  10   4 -12    0.33    0.83
 -10   4 -12    1.24    0.79
  10   4  12    1.79    0.83
  10   4 -13    0.90    0.92
  10  -4  13    1.02    0.63
  10   4  13    1.48    0.93
  10  -4 -13    1.58    0.82
 -10   4 -13    1.39    0.94
  10   4 -14   -0.57    0.84
  10   4  14   -0.10    0.84
  10  -4 -14    1.21    0.67
 -10   4 -14    1.25    0.86
  10   4 -15    0.15    0.98
  10   4  15    0.23    1.00
  10  -4 -15    1.90    0.97
 -10   4 -15    1.98    1.01
  11  -4   0    2.19    0.72
  11   4   0    2.53    0.68
  11   4   0    2.14    0.35
 -11   4   0    2.11    0.55
  11  -4   1    1.24    0.57
 -11   4   1    1.09    0.36
  11   4  -1    0.77    0.50
  11  -4  -1   -0.13    0.56
  11   4   1    0.74    0.28
  11   4   1    0.43    0.50
 -11   4  -1    1.30    0.41
  11   4  -2    0.99    0.49
 -11   4   2   -0.09    0.34
  11  -4   2   -0.17    0.48
  11  -4  -2   -0.03    0.38
 -11   4  -2    0.96    0.40
  11   4   2   -0.28    0.41
  11   4   2    0.48    0.28
  11   4  -3    0.69    0.60
  11  -4   3    1.67    0.55
 -11   4   3    0.08    0.33
  11   4   3   -0.17    0.43
  11  -4  -3    0.85    0.58
 -11   4  -3    1.13    0.52
  11   4   3    1.27    0.43
 -11   4   4    4.47    0.56
  11  -4   4    5.37    0.89
  11   4  -4    4.77    0.97
 -11   4  -4    4.89    0.88
  11  -4  -4    5.08    1.01
  11   4   4    3.80    0.77
  11   4   4    3.82    0.61
  11   4  -5    0.18    0.49
  11  -4   5   -0.01    0.52
 -11   4   5    0.68    0.33
  11   4   5    0.11    0.48
  11  -4  -5    0.28    0.57
  11   4   5    0.46    0.32
 -11   4  -5    0.47    0.54
  11   4  -6    4.68    0.99
  11  -4   6    4.25    0.85
 -11   4   6    2.57    0.46
  11  -4  -6    4.58    0.94
 -11   4  -6    3.20    0.91
  11   4   6    4.50    0.86
  11   4   6    2.77    0.48
  11   4  -7    0.09    0.74
  11  -4   7    0.66    0.59
 -11   4  -7    0.97    0.66
  11  -4  -7    0.97    0.56
  11   4   7    0.81    0.63
  11   4  -8    1.15    0.71
  11  -4   8    0.27    0.57
  11   4   8    0.57    0.68
  11  -4  -8    1.16    0.71
 -11   4  -8    1.22    0.68
  11   4  -9    0.10    0.52
  11  -4   9    0.55    0.54
 -11   4  -9    1.59    0.66
  11   4   9    0.36    0.66
  11  -4  -9    0.01    0.73
  11  -4  10    1.32    0.64
  11   4 -10    0.16    0.78
  11  -4 -10    2.21    0.85
 -11   4 -10    0.43    0.76
  11   4  10    0.67    0.79
  11   4 -11    1.10    0.86
  11  -4  11    0.99    0.72
  11  -4 -11    3.38    0.91
 -11   4 -11    1.45    0.87
  11   4  11    1.42    0.93
  11  -4  12    1.08    0.55
  11   4 -12    0.87    0.86
  11   4  12    1.29    0.85
  11  -4 -12   -0.24    0.71
 -11   4 -12    0.67    0.87
  11   4 -13    0.41    0.92
  11  -4  13    0.98    0.62
  11   4  13    2.09    0.91
 -11   4 -13    0.07    0.93
  11   4 -14   -0.11    0.92
  11   4  14    1.75    0.91
 -11   4 -14    0.23    0.92
  12   4   0    1.34    0.67
  12  -4   0    1.49    0.69
 -12   4   0    1.46    0.45
  12   4  -1    0.88    0.65
  12  -4   1    1.27    0.62
 -12   4   1    1.96    0.40
  12   4   1    1.23    0.61
  12   4   1    0.35    0.30
  12  -4  -1    1.39    0.63
 -12   4  -1    0.87    0.46
 -12   4   2    0.27    0.40
  12  -4   2    2.18    0.56
  12   4   2    0.81    0.33
 -12   4  -2    0.27    0.44
  12   4   2    0.15    0.52
  12  -4  -2   -0.30    0.59
  12   4  -3    1.22    0.68
  12  -4   3    0.18    0.62
 -12   4   3    0.90    0.40
  12  -4  -3    0.23    0.67
  12   4   3    1.24    0.50
 -12   4  -3    1.01    0.51
  12   4   3    0.80    0.41
 -12   4   4    0.08    0.34
  12  -4   4    0.72    0.58
  12   4  -4   -0.04    0.66
  12   4   4    1.10    0.43
  12   4   4    0.95    0.40
  12  -4  -4    1.74    0.64
 -12   4  -4    0.17    0.59
  12  -4   5    0.38    0.61
  12   4  -5    0.59    0.68
  12   4   5    1.09    0.50
 -12   4  -5    0.14    0.61
  12  -4  -5    1.29    0.68
  12  -4   6    1.89    0.78
  12   4  -6    1.43    0.92
  12   4   6    2.40    0.72
  12  -4  -6    1.84    0.91
  12   4   6    2.88    0.51
 -12   4  -6    2.02    0.82
  12   4  -7    0.49    0.70
 -12   4  -7    0.25    0.62
  12   4   7    0.58    0.60
  12   4  -8   -0.09    0.52
  12  -4  -8   -0.36    0.52
  12   4   8    0.30    0.50
  12   4  -9    0.42    0.84
  12  -4   9    2.03    0.73
  12  -4  -9    3.74    0.99
 -12   4  -9    1.69    0.84
  12   4   9    0.54    0.87
  12  -4  10    0.50    0.61
  12   4 -10    0.15    0.60
  12   4  10   -0.13    0.75
  12  -4 -10    1.65    0.76
 -12   4 -10    0.10    0.69
  12   4 -11   -0.28    0.54
  12  -4  11   -0.01    0.38
  12  -4 -11   -0.59    0.54
 -12   4 -11    0.22    0.44
  12   4  11    0.52    0.55
  12  -4  12    1.22    0.73
  12   4 -12    1.96    0.91
  12   4  12    0.09    0.94
  12  -4 -12   -0.14    0.88
  12   4  13   -0.44    0.92
  12  -4 -13    1.76    0.88
 -12   4 -13    0.34    0.92
  13  -4   0    0.16    0.50
  13   4  -1    0.92    0.70
 -13   4   1    0.95    0.43
  13  -4   1    1.50    0.65
 -13   4  -1    0.89    0.55
  13   4   1    0.42    0.68
  13  -4  -1    1.16    0.70
 -13   4   2    0.64    0.42
  13  -4   2    1.00    0.62
  13   4  -2    0.51    0.67
  13   4   2    1.04    0.60
 -13   4  -2    1.28    0.55
  13   4   2    0.17    0.39
 -13   4   3    0.94    0.40
  13  -4   3    1.25    0.70
  13   4  -3    2.33    0.81
  13  -4  -3    1.33    0.78
  13   4   3    1.08    0.57
  13   4   3    0.94    0.46
 -13   4  -3    1.15    0.66
  13   4  -4    0.16    0.70
 -13   4  -4    1.03    0.57
  13   4   4    0.63    0.53
  13   4   4    0.90    0.48
  13   4  -5   -0.20    0.65
  13  -4   5   -0.07    0.57
 -13   4  -5    0.25    0.57
  13   4   5    0.42    0.50
  13  -4  -5    0.84    0.62
  13  -4   6    1.40    0.67
  13   4  -6    0.85    0.81
 -13   4  -6    0.17    0.73
  13   4   6    1.12    0.67
  13  -4   7    0.05    0.47
  13   4  -7    0.07    0.57
  13   4   7   -0.21    0.44
  13  -4   8    1.05    0.57
  13   4  -8   -0.03    0.60
  13  -4  -8   -0.15    0.73
  13   4   8   -0.17    0.64
  13   4  -9   -0.03    0.80
 -13   4  -9    1.39    0.76
  13  -4  -9    0.88    0.91
  13   4   9    0.82    0.81
  13  -4  10    1.34    0.67
  13   4 -10   -0.16    0.90
 -13   4 -10    1.49    0.86
  13   4  10    0.29    0.87
  13  -4 -10    2.15    0.96
  13  -4  11    1.73    0.79
  13   4 -11    0.07    0.88
  13  -4 -11    1.82    0.96
 -13   4 -11    0.53    1.00
  13   4  11   -0.30    0.94
  13   4 -12   -0.24    0.62
  13   4  12   -0.41    0.66
  13  -4 -12    0.81    0.63
 -13   4 -12   -0.14    0.66
  14   4   0    0.94    0.39
  14  -4   0   -0.37    0.36
 -14   4   0   -0.29    0.31
 -14   4   1    1.05    0.45
  14  -4  -1    0.09    0.60
 -14   4  -1    0.88    0.57
  14   4  -2    3.47    0.95
  14  -4   2    1.97    0.85
  14   4  -3    1.32    0.83
  14  -4   3    1.01    0.75
  14   4   3    0.23    0.71
  14  -4  -3    1.03    0.75
 -14   4  -3    2.42    0.69
  14  -4   4    0.16    0.63
  14   4  -4   -0.12    0.73
  14   4   4    0.50    0.52
 -14   4  -4    0.18    0.57
  14  -4  -4    1.29    0.71
  14   4   4    1.00    0.46
  14   4  -5    1.48    0.85
  14   4   5    0.94    0.57
  14  -4  -5    1.05    0.64
  14   4   5    0.53    0.54
  14   4  -6    1.36    0.91
  14  -4   6    0.31    0.76
  14   4   6    0.34    0.77
 -14   4  -6    3.27    0.81
  14  -4  -6    1.24    0.90
  14   4  -7   -0.06    0.95
  14  -4   7    1.18    0.75
 -14   4  -7    1.49    0.83
  14   4   7    1.11    0.70
  14  -4   8    1.40    0.77
  14   4  -8    0.35    0.90
  14   4   8    0.09    0.82
 -14   4  -8    1.21    0.80
  14  -4   9    1.95    0.85
  14   4  -9    0.41    0.96
  14   4   9    1.51    0.97
  14  -4  -9    0.40    1.05
 -14   4  -9    1.70    1.01
  14   4 -10   -0.22    0.80
  14  -4  10   -0.13    0.74
  14  -4 -10    2.20    0.91
  14   4  10    0.79    0.89
  15  -4   0    1.69    0.92
  15  -4   1    0.67    0.86
  15   4  -1    1.53    0.93
  15  -4  -1    1.66    0.90
  15   4   1    2.35    0.87
  15  -4   2    2.04    0.89
 -15   4  -2    1.73    0.77
  15  -4   3    2.54    0.85
  15   4  -3   -0.12    0.95
  15  -4  -3    1.60    0.85
  15   4   3    1.13    0.81
 -15   4  -3    1.23    0.75
  15   4  -4   -0.24    0.87
  15  -4  -4    1.52    0.80
 -15   4  -4    0.89    0.64
  15  -4   5    1.41    0.83
  15   4  -5    0.60    0.94
  15  -4  -5    1.65    0.93
  15   4  -6   -0.60    0.97
  15  -4   6    0.57    0.80
 -15   4  -6    1.85    0.73
  15  -4  -6    1.44    0.92
  15  -4   7    1.63    0.86
  15   4  -7    0.16    1.05
 -15   4  -7    2.20    0.95
  15  -4  -7    0.92    1.08
  15  -4   8    2.17    0.86
  15   4  -8   -0.38    1.08
  15  -4  -8    1.42    1.09
  16  -4   0    1.21    0.93
  16   4   1    3.87    1.12
  16  -4  -1    2.08    1.12
  16  -4   2    3.61    1.09
  16   4  -2    3.16    1.23
  16  -4  -2    3.79    1.17
  16  -4   3    1.30    0.89
  16   4  -3    0.84    1.02
  16   4  -4    1.75    0.95
  16  -4   4    0.01    0.79
  16  -4   5    1.98    1.04
  16   4  -5    3.11    1.27
 -16   4  -6    0.37    0.84
   0   5   0    0.20    0.16
   0  -5   0    0.05    0.16
   0   5  -1    1.97    0.32
   0  -5   1    1.64    0.30
   0   5   1    1.92    0.28
   0  -5  -1    2.38    0.27
   0   5   2   -0.11    0.24
   0   5  -2    0.13    0.21
   0  -5  -2    0.43    0.13
   0   5  -3   31.14    1.19
   0   5  -3   30.80    1.30
   0   5   3   29.72    1.26
   0  -5  -3   31.54    0.88
   0   5  -4    0.13    0.21
   0   5  -4    0.53    0.25
   0   5   4    0.17    0.20
   0  -5  -4    0.04    0.11
   0   5  -5   19.30    1.04
   0   5  -5   18.89    0.91
   0   5   5   18.20    0.93
   0  -5  -5   19.50    0.59
   0   5  -6   -0.07    0.16
   0   5  -6    0.05    0.23
   0   5   6    0.16    0.22
   0  -5  -6    0.00    0.08
   0   5  -7    2.83    0.58
   0   5  -7    3.22    0.44
   0   5   7    2.88    0.53
   0  -5  -7    3.09    0.20
   0   5  -8   -0.06    0.22
   0   5   8   -0.12    0.27
   0  -5  -8    0.06    0.08
   0   5  -8    0.09    0.30
   0   5  -9    0.49    0.28
   0   5  -9    0.07    0.39
   0   5   9    0.12    0.35
   0   5 -10    0.18    0.32
   0   5  10    0.32    0.35
   0   5 -10    0.02    0.32
   0   5 -11    2.54    0.55
   0   5 -11    3.05    0.73
   0   5  11    2.62    0.70
   0   5 -12    0.06    0.28
   0   5 -12   -0.27    0.35
   0   5  12    0.17    0.34
   0   5 -13    6.28    0.95
   0   5 -13    6.33    1.10
   0   5  13    8.37    1.13
   0   5 -14    0.95    0.61
   0   5  14    0.05    0.62
   0   5 -15    1.21    0.73
   0   5 -15    1.17    0.69
   0   5  15    1.19    0.75
   0   5 -16   -0.23    0.46
   0   5 -16    0.22    0.40
   0   5 -17    1.30    0.68
   0  -5  18   -0.31    0.55
   0   5  18    1.13    0.66
   0   5  19    1.81    0.96
   1   5   0   22.36    0.88
   1  -5   0   21.73    0.86
  -1   5   0   22.04    0.95
   1   5   0   21.06    0.89
   1   5  -1   11.38    0.60
  -1  -5  -1   10.85    0.48
  -1   5   1   11.62    0.68
   1  -5   1   11.10    0.66
   1   5  -1   11.44    0.65
   1   5   1   11.08    0.66
   1  -5  -1   11.23    0.56
  -1   5  -1   10.81    0.58
   1   5  -2   24.64    0.96
   1   5  -2   25.06    1.09
  -1   5   2   23.70    1.05
   1  -5   2   24.72    1.05
   1   5   2   24.89    1.07
   1  -5  -2   25.81    0.87
  -1   5  -2   25.50    1.07
   1   5  -3   22.54    0.94
  -1  -5  -3   22.69    0.67
  -1   5   3   22.58    1.07
   1  -5   3   21.24    1.02
   1   5  -3   23.36    1.09
   1   5   3   22.96    1.08
   1  -5  -3   22.15    0.74
  -1   5  -3   22.15    1.02
   1   5  -4   12.75    0.68
  -1  -5  -4   13.93    0.44
  -1   5   4   13.55    0.80
   1  -5   4   12.51    0.77
   1   5  -4   14.04    0.88
   1   5   4   13.45    0.75
   1  -5  -4   10.99    0.47
  -1   5  -4   12.88    0.75
   1   5  -5    9.95    0.60
   1   5  -5    9.86    0.80
  -1  -5  -5    9.81    0.32
  -1   5   5   11.09    0.74
   1  -5   5    9.22    0.69
   1   5   5    9.76    0.75
   1  -5  -5    9.97    0.44
  -1   5  -5   10.27    0.70
   1   5  -6   13.54    0.75
  -1  -5  -6   13.97    0.36
  -1   5   6   14.55    0.90
   1  -5   6   12.79    0.78
   1   5  -6   13.45    0.98
   1   5   6   14.08    0.94
   1  -5  -6   14.32    0.55
  -1   5  -6   14.35    0.86
   1   5  -7    1.79    0.48
  -1   5   7    2.15    0.44
   1   5  -7    1.57    0.34
   1   5   7    1.76    0.44
   1  -5  -7    1.57    0.22
  -1   5  -7    1.26    0.39
   1   5  -8    9.56    0.94
   1   5  -8    9.83    0.66
  -1   5   8    9.75    0.85
   1   5   8   10.99    0.96
   1  -5  -8   10.13    0.49
  -1   5  -8   10.11    0.79
   1   5  -9    0.77    0.46
  -1   5   9    0.24    0.40
   1   5  -9    1.07    0.28
   1   5   9    0.72    0.36
   1  -5  -9    0.71    0.19
  -1   5  -9    0.61    0.36
  -1   5  -9    0.48    0.36
   1   5 -10    0.10    0.27
  -1   5  10    0.85    0.36
   1   5 -10    0.23    0.42
   1   5  10    0.40    0.33
   1  -5 -10   -0.06    0.16
  -1   5 -10    1.06    0.36
  -1   5 -10    0.16    0.33
   1   5 -11    1.50    0.39
  -1   5  11    0.84    0.49
   1   5 -11    0.28    0.55
   1   5  11    0.19    0.56
   1   5 -12    6.01    1.02
   1   5 -12    6.54    0.80
  -1   5  12    5.52    0.90
   1   5  12    5.09    1.01
  -1   5 -12    6.34    0.90
   1   5 -13    2.71    0.64
   1   5 -13    1.87    0.78
  -1   5  13    1.79    0.60
   1   5  13    1.81    0.77
  -1   5 -13    1.63    0.71
   1   5 -14    1.79    0.85
   1   5 -14    3.22    0.72
  -1   5  14    2.03    0.73
   1  -5  14    2.60    0.74
   1   5  14    1.11    0.86
  -1   5 -14    2.70    0.74
   1   5 -15    0.78    0.55
   1   5 -15    1.30    0.73
  -1   5  15    1.22    0.65
   1  -5  15    1.03    0.62
   1   5  15    1.39    0.71
  -1   5 -15    0.06    0.68
   1   5 -16   -0.02    0.75
   1   5 -16    2.80    0.66
  -1   5  16    1.39    0.59
   1  -5  16   -0.17    0.66
   1   5  16    1.61    0.77
  -1   5 -16   -0.12    0.76
   1   5 -17    0.44    0.84
   1   5 -17    2.95    0.61
   1  -5  17    2.17    0.78
  -1   5  17    1.34    0.77
   1   5  17    1.10    0.86
  -1   5 -17   -0.18    0.85
   1   5 -18    0.24    0.90
  -1   5  18    1.83    0.82
   1  -5  18    1.38    0.79
   1   5  18    1.41    0.93
  -1   5  19   -0.40    0.74
   1   5  19    1.48    0.84
   2   5   0   53.28    1.70
   2   5   0   53.18    1.64
   2  -5   0   54.50    1.70
  -2   5   0   51.56    1.77
   2   5  -1    0.78    0.25
  -2   5   1    0.59    0.29
   2  -5   1    0.59    0.29
   2   5  -1    0.51    0.28
   2   5   1    0.85    0.27
   2   5   1    0.77    0.19
   2  -5  -1    0.58    0.26
  -2   5  -1    0.66    0.25
   2   5  -2    1.78    0.31
   2   5  -2    1.56    0.37
  -2   5   2    2.47    0.41
   2  -5   2    1.93    0.39
   2   5   2    2.27    0.39
   2  -5  -2    2.05    0.31
  -2   5  -2    2.39    0.39
   2   5   2    2.28    0.23
  -2  -5  -3   15.29    0.50
  -2   5   3   14.96    0.83
   2  -5   3   16.65    0.91
   2   5  -3   14.42    0.65
   2   5  -3   15.50    0.93
   2   5   3   16.06    0.89
   2  -5  -3   14.93    0.65
  -2   5  -3   15.52    0.88
  -2   5   4   14.96    0.87
   2  -5   4   14.24    0.88
   2   5  -4   14.41    0.85
   2   5  -4   14.38    0.68
  -2  -5  -4   14.51    0.43
   2  -5  -4   14.17    0.64
  -2   5  -4   14.30    0.86
   2   5   4   14.21    0.88
  -2   5   5    1.65    0.32
   2  -5   5    2.03    0.33
   2   5  -5    1.28    0.25
   2   5  -5    1.65    0.42
  -2  -5  -5    1.41    0.11
   2   5   5    1.44    0.40
  -2   5  -5    2.21    0.39
  -2   5   6    7.07    0.62
   2  -5   6    6.69    0.64
   2   5  -6    5.66    0.72
   2   5  -6    5.98    0.48
   2   5   6    6.59    0.72
   2  -5  -6    7.00    0.41
  -2   5  -6    7.18    0.66
   2   5  -7    1.55    0.28
  -2   5   7    1.30    0.41
   2  -5   7    1.02    0.41
   2   5  -7    1.47    0.41
   2   5   7    2.24    0.48
   2  -5  -7    1.64    0.22
  -2   5  -7    1.65    0.42
  -2   5   8    1.76    0.45
   2  -5   8    1.63    0.44
   2   5  -8    1.86    0.32
   2   5  -8    1.43    0.52
   2   5   8    1.04    0.42
   2  -5  -8    1.24    0.23
  -2   5  -8    1.53    0.43
  -2   5   9    6.08    0.70
   2  -5   9    4.98    0.73
   2   5  -9    4.85    0.48
   2   5  -9    5.52    0.79
   2   5   9    5.43    0.75
   2  -5  -9    5.62    0.49
  -2   5  -9    5.47    0.68
  -2   5  10    0.42    0.44
   2  -5  10    0.52    0.43
   2   5 -10    1.00    0.50
   2   5 -10    1.26    0.33
   2   5  10    0.51    0.38
   2  -5 -10    0.37    0.24
  -2   5 -10    0.42    0.46
  -2   5  11   11.51    1.14
   2  -5  11   13.57    1.16
   2   5 -11   14.40    1.02
   2   5 -11   13.17    1.31
   2   5  11   12.10    1.20
   2  -5 -11   11.94    0.73
  -2   5 -11   12.73    1.23
  -2   5  12    2.21    0.68
   2  -5  12    2.43    0.70
   2   5 -12    2.83    0.58
   2   5 -12    3.13    0.79
   2   5  12    1.85    0.74
  -2   5 -12    2.65    0.73
  -2   5  13    0.60    0.51
   2  -5  13    0.69    0.53
   2   5 -13   -0.36    0.59
   2   5 -13    0.83    0.38
  -2   5 -13    0.22    0.53
   2   5  13    0.42    0.56
  -2   5  14   -0.13    0.53
   2  -5  14    0.13    0.48
   2   5 -14   -0.18    0.43
   2   5 -14    1.05    0.62
  -2   5 -14    0.98    0.58
   2   5  14    2.14    0.59
   2   5 -15    1.37    0.53
   2   5 -15    0.02    0.67
  -2   5  15    0.10    0.61
   2  -5  15    0.71    0.61
   2   5  15    0.95    0.66
  -2   5 -15    1.15    0.70
   2   5 -16    1.06    0.56
  -2   5  16   -0.04    0.51
   2  -5  16   -0.36    0.49
   2   5  16   -0.06    0.55
  -2   5 -16    0.34    0.59
   2   5 -17   -0.11    0.75
  -2   5  17    1.00    0.66
  -2   5 -17    2.20    0.77
   2   5  17   -0.36    0.75
   2   5 -18    0.67    0.85
   2   5  18    0.10    0.87
  -2   5 -18    1.36    0.83
  -2   5 -19    1.47    1.00
   3   5   0    7.61    0.56
   3   5   0    8.18    0.56
   3  -5   0    7.01    0.62
  -3   5   0    8.44    0.67
   3   5  -1    0.54    0.25
   3   5  -1    0.15    0.22
  -3   5   1    0.44    0.30
   3  -5   1    0.49    0.31
   3   5   1    0.60    0.22
   3   5   1    0.14    0.27
   3  -5  -1    0.35    0.28
  -3   5  -1    0.19    0.26
   3   5  -2    5.82    0.39
   3   5  -2    6.31    0.65
  -3   5   2    5.85    0.57
   3  -5   2    5.86    0.58
   3   5   2    5.39    0.35
   3   5   2    5.79    0.56
   3  -5  -2    5.29    0.50
  -3   5  -2    6.07    0.61
   3   5  -3   15.46    0.64
   3   5  -3   15.99    1.03
  -3   5   3   14.94    0.90
   3  -5   3   14.26    0.90
   3   5   3   15.24    0.54
   3   5   3   13.88    0.87
   3  -5  -3   15.02    0.77
  -3   5  -3   14.88    0.92
   3   5  -4    5.69    0.69
   3   5  -4    3.38    0.33
  -3   5   4    4.74    0.52
   3  -5   4    5.38    0.57
   3   5   4    4.94    0.55
   3  -5  -4    5.57    0.42
  -3   5  -4    5.20    0.49
   3   5  -5    8.71    0.88
  -3  -5  -5    7.96    0.24
  -3   5   5    8.03    0.65
   3  -5   5    7.68    0.71
   3   5   5    8.74    0.79
   3  -5  -5    8.89    0.57
  -3   5  -5    7.73    0.77
   3   5  -6    3.94    0.55
   3   5  -6    2.20    0.26
  -3   5   6    3.35    0.47
   3  -5   6    2.84    0.51
   3   5   6    3.55    0.58
   3  -5  -6    3.17    0.35
  -3   5  -6    4.00    0.52
   3   5  -7    2.84    0.29
   3   5  -7    2.81    0.59
  -3   5   7    2.68    0.48
   3  -5   7    2.90    0.54
   3   5   7    3.31    0.54
   3  -5  -7    3.19    0.34
  -3   5  -7    2.87    0.53
   3   5  -8    6.96    0.86
   3   5  -8    6.55    0.48
  -3   5   8    7.17    0.70
   3  -5   8    7.11    0.68
   3   5   8    7.91    0.80
  -3   5  -8    6.71    0.79
   3   5  -9    5.30    0.84
   3   5  -9    6.16    0.51
  -3   5   9    6.36    0.70
   3  -5   9    4.36    0.77
   3   5   9    6.67    0.82
   3  -5  -9    6.98    0.51
  -3   5  -9    5.33    0.74
   3   5 -10    1.31    0.38
   3   5 -10    1.44    0.62
  -3   5  10    1.11    0.50
   3  -5  10    1.66    0.55
   3   5  10    1.89    0.58
   3  -5 -10    1.80    0.33
  -3   5 -10    0.85    0.58
   3   5 -11    7.39    0.62
   3   5 -11    7.37    1.09
  -3   5  11    7.34    0.89
   3  -5  11    8.61    0.99
   3   5  11    6.13    1.00
   3  -5 -11    6.58    0.57
  -3   5 -11    7.60    1.05
   3   5 -12    2.54    0.80
   3   5 -12    1.60    0.41
  -3   5  12    1.63    0.63
   3  -5  12    2.72    0.70
   3   5  12    2.85    0.72
   3  -5 -12    2.14    0.39
  -3   5 -12    1.55    0.71
   3   5 -13    1.17    0.67
   3   5 -13    0.40    0.39
  -3   5  13    1.50    0.48
   3  -5  13   -0.29    0.60
   3   5  13    1.58    0.63
  -3   5 -13    0.97    0.63
   3   5 -14    1.61    0.77
   3   5 -14    0.80    0.46
  -3   5  14    0.62    0.64
   3  -5  14    2.75    0.68
   3   5  14    1.50    0.70
  -3   5 -14    1.77    0.72
   3   5 -15    0.02    0.63
   3  -5  15    0.59    0.50
  -3   5 -15    0.36    0.62
   3   5 -16    0.75    0.79
  -3   5  16    0.03    0.57
   3  -5  16    0.57    0.69
   3   5  16    1.86    0.74
  -3   5 -16    2.90    0.83
   3   5 -17    0.24    0.84
  -3   5  17    2.21    0.71
   3  -5  17    0.16    0.77
  -3   5 -17    1.53    0.87
   3   5 -18    0.14    0.82
  -3   5  18    0.90    0.72
   3  -5  18    0.94    0.61
   3   5  18   -0.45    0.81
  -3   5 -18    1.35    0.84
   4   5   0   38.94    1.39
   4   5   0   38.53    1.46
   4  -5   0   37.75    1.49
  -4   5   0   37.78    1.53
   4   5  -1  113.88    3.48
   4   5  -1  118.52    2.93
  -4   5   1  110.97    3.41
   4  -5   1  110.94    3.44
   4   5   1  109.29    3.13
   4   5   1  121.28    3.25
   4  -5  -1  113.18    3.30
  -4   5  -1  114.20    3.52
   4   5  -2    7.10    0.42
   4   5  -2    7.20    0.71
  -4   5   2    7.17    0.65
   4  -5   2    7.85    0.72
   4   5   2    7.52    0.47
   4   5   2    6.86    0.63
   4  -5  -2    7.42    0.65
  -4   5  -2    7.75    0.72
   4   5  -3    8.34    0.43
   4   5  -3   10.02    0.85
  -4   5   3   10.87    0.72
   4  -5   3   10.43    0.70
   4   5   3   10.44    0.45
   4   5   3   10.17    0.71
   4  -5  -3    9.94    0.69
  -4   5  -3   10.19    0.78
  -4   5   4    8.78    0.70
   4   5  -4    8.64    0.81
   4   5  -4    8.22    0.43
   4  -5   4    8.12    0.64
   4   5   4    7.58    0.36
   4   5   4    8.13    0.77
   4  -5  -4    8.05    0.63
  -4   5  -4    7.75    0.67
   4   5  -5   14.84    1.00
  -4   5   5   14.40    0.88
   4  -5   5   14.29    0.99
   4   5  -5   14.36    0.60
   4   5   5   13.67    0.40
   4   5   5   15.03    1.03
   4  -5  -5   14.80    0.82
  -4   5  -5   16.12    1.07
  -4   5   6    3.79    0.50
   4  -5   6    3.93    0.59
   4   5  -6    4.05    0.30
   4   5  -6    3.43    0.67
   4   5   6    3.98    0.61
   4  -5  -6    3.98    0.49
  -4   5  -6    3.78    0.60
   4   5  -7    5.36    0.43
  -4   5   7    6.58    0.66
   4  -5   7    6.27    0.71
   4   5  -7    7.53    0.90
   4   5   7    5.80    0.64
   4  -5  -7    7.26    0.60
  -4   5  -7    5.23    0.72
  -4   5   8    1.64    0.43
   4  -5   8    1.53    0.48
   4   5  -8    0.94    0.61
   4   5  -8    1.26    0.23
   4   5   8    1.23    0.50
   4  -5  -8    1.61    0.34
  -4   5  -8    1.26    0.42
   4   5  -9    3.98    0.39
  -4   5   9    3.82    0.51
   4  -5   9    3.53    0.67
   4   5  -9    4.00    0.73
   4   5   9    3.36    0.59
   4  -5  -9    3.33    0.51
  -4   5  -9    3.30    0.71
  -4   5  10    1.08    0.41
   4  -5  10    1.02    0.51
   4   5 -10    0.71    0.29
   4   5 -10    2.15    0.71
   4   5  10    0.79    0.60
   4  -5 -10    1.81    0.42
  -4   5 -10    1.54    0.60
   4   5 -11    2.00    0.43
  -4   5  11    1.88    0.51
   4  -5  11    2.27    0.64
   4   5 -11    2.60    0.78
   4   5  11    2.16    0.75
  -4   5 -11    2.25    0.61
   4   5 -12    1.28    0.67
   4   5 -12    1.02    0.35
  -4   5  12    1.41    0.51
   4  -5  12    0.60    0.59
   4   5  12    1.26    0.67
   4  -5 -12    0.77    0.36
  -4   5 -12    1.26    0.62
   4   5 -13    2.38    0.76
  -4   5  13    1.13    0.58
   4  -5  13    1.35    0.65
   4   5  13    1.33    0.75
   4  -5 -13    1.66    0.44
  -4   5 -13    0.90    0.73
   4   5 -14    1.06    0.72
  -4   5  14    1.31    0.49
   4  -5  14    0.02    0.62
  -4   5 -14    1.39    0.71
   4   5 -15    0.70    0.78
  -4   5  15    2.67    0.59
   4  -5  15    0.88    0.65
   4   5  15    0.18    0.75
  -4   5 -15   -0.05    0.75
  -4   5  16    3.18    0.70
   4  -5  16    1.94    0.67
   4   5 -16    1.47    0.96
  -4   5 -16    0.98    0.98
   4   5 -17   -0.13    0.80
   4  -5  17   -0.04    0.66
  -4   5 -17    2.34    0.82
   4   5 -18   -0.54    0.91
   4   5  18    1.23    0.90
  -4   5 -18    2.31    0.96
   5   5   0    0.17    0.20
  -5   5   0    0.15    0.27
   5   5   0   -0.13    0.24
   5   5  -1   34.96    1.50
   5   5  -1   32.58    1.15
   5  -5   1   34.57    1.60
  -5   5   1   36.18    1.58
   5   5   1   34.30    1.31
   5   5   1   35.02    1.38
   5  -5  -1   35.19    1.61
  -5   5  -1   36.75    1.66
   5   5  -2    6.69    0.71
   5   5  -2    7.40    0.41
   5  -5   2    7.46    0.73
  -5   5   2    6.76    0.68
   5   5   2    7.05    0.56
   5   5   2    6.75    0.46
   5  -5  -2    7.08    0.68
  -5   5  -2    7.22    0.72
   5   5  -3   10.10    0.51
   5  -5   3   10.28    0.85
   5   5  -3    9.12    0.87
  -5   5   3   10.16    0.74
   5   5   3   10.88    0.77
   5   5   3   10.14    0.50
   5  -5  -3    9.44    0.79
  -5   5  -3    9.77    0.86
   5  -5   4    8.80    0.81
  -5   5   4    8.90    0.70
   5   5  -4    8.90    0.43
   5   5  -4    8.89    0.88
   5   5   4    9.04    0.81
   5   5   4    8.49    0.45
   5  -5  -4    9.37    0.76
   5  -5   5    8.41    0.81
   5   5  -5    8.06    0.43
   5   5  -5    8.07    0.88
  -5   5   5    8.51    0.68
  -5   5  -5    9.28    0.85
   5   5   5    8.68    0.78
   5  -5  -5    8.98    0.72
   5   5   5    7.24    0.33
   5  -5   6    1.54    0.42
   5   5  -6    1.92    0.23
  -5   5   6    2.22    0.40
   5   5  -6    1.60    0.58
  -5   5  -6    2.32    0.54
   5   5   6    1.91    0.51
   5  -5  -6    1.81    0.40
   5  -5   7    5.46    0.70
   5   5  -7    4.60    0.34
  -5   5   7    5.80    0.61
   5   5  -7    5.66    0.84
   5   5   7    4.94    0.63
   5  -5  -7    5.70    0.59
  -5   5  -7    4.95    0.73
   5   5  -8   10.93    0.57
   5   5  -8   12.82    1.08
   5  -5   8   10.79    1.03
  -5   5   8   11.47    0.81
  -5   5  -8    9.77    1.05
   5   5   8   11.94    1.02
   5  -5  -8   12.41    0.95
   5  -5   9    2.67    0.68
   5   5  -9    3.85    0.38
   5   5  -9    3.47    0.86
  -5   5   9    3.63    0.54
   5   5   9    3.10    0.79
  -5   5  -9    3.21    0.67
   5  -5  -9    3.83    0.59
   5  -5  10    4.67    0.80
   5   5 -10    5.29    1.05
  -5   5  10    4.20    0.67
  -5   5 -10    4.06    0.91
   5  -5 -10    3.91    0.65
   5   5  10    5.33    0.93
   5  -5  11    2.87    0.73
  -5   5  11    1.61    0.55
   5   5 -11    4.20    0.95
  -5   5 -11    4.42    0.84
   5   5  11    2.96    0.86
   5  -5 -11    3.74    0.58
   5  -5  12    0.23    0.46
   5   5 -12    1.51    0.71
  -5   5  12    0.58    0.39
  -5   5 -12    0.45    0.61
   5   5  12    1.26    0.63
   5  -5 -12    0.72    0.38
   5   5 -13    1.17    0.71
   5  -5  13    0.22    0.54
  -5   5  13    1.00    0.43
   5  -5 -13    1.34    0.42
  -5   5 -13    0.99    0.70
   5   5  13    0.69    0.59
   5   5 -14    1.59    0.73
   5  -5  14    0.46    0.62
  -5   5  14    0.66    0.46
  -5   5 -14    1.07    0.71
   5   5  14    1.21    0.73
   5  -5 -14    0.72    0.44
   5  -5  15    0.34    0.60
   5   5 -15    0.13    0.73
  -5   5 -15    0.66    0.72
   5   5  15    1.38    0.70
   5  -5  16   -0.18    0.60
   5   5 -16    1.39    0.82
  -5   5  16    1.09    0.51
   5   5  16    0.27    0.81
  -5   5 -16    2.30    0.87
   5  -5  17    1.48    0.73
   5   5 -17   -0.38    0.94
   5   5  17    2.13    0.85
   5   5 -18    1.03    0.96
  -5   5 -18    0.80    1.01
   6  -5   0    1.00    0.45
  -6   5   0    0.63    0.42
   6   5   0    1.17    0.37
   6   5   0    1.05    0.25
   6   5  -1    8.43    0.74
  -6   5   1    9.33    0.77
   6  -5   1    8.31    0.73
   6   5   1    8.09    0.60
   6   5   1    7.80    0.57
   6  -5  -1    8.22    0.69
  -6   5  -1    9.26    0.79
   6   5  -2    4.81    0.70
   6   5  -2    6.14    0.43
  -6   5   2    5.90    0.62
   6  -5   2    6.11    0.71
   6  -5  -2    4.77    0.68
  -6   5  -2    6.02    0.69
   6   5   2    5.21    0.45
   6   5   2    5.26    0.56
   6   5  -3   30.07    0.97
   6   5  -3   29.27    1.63
  -6   5   3   31.76    1.45
   6  -5   3   29.42    1.57
   6   5   3   28.79    1.09
   6   5   3   29.99    1.51
   6  -5  -3   30.26    1.57
  -6   5  -3   31.24    1.63
   6   5  -4    7.62    0.40
   6   5  -4    7.55    0.88
  -6   5   4    8.30    0.67
   6  -5   4    7.45    0.80
   6  -5  -4    8.68    0.78
   6   5   4    7.26    0.46
   6   5   4    6.80    0.74
  -6   5  -4    8.37    0.75
   6   5  -5    3.87    0.27
   6   5  -5    3.99    0.72
  -6   5   5    3.23    0.51
   6  -5   5    3.90    0.65
   6   5   5    3.58    0.29
   6   5   5    4.16    0.60
   6  -5  -5    4.29    0.59
  -6   5  -5    3.54    0.56
   6   5  -6    4.13    0.80
   6   5  -6    4.24    0.28
  -6   5   6    4.26    0.55
   6  -5   6    4.86    0.58
   6   5   6    4.17    0.71
   6  -5  -6    4.71    0.64
  -6   5  -6    3.99    0.73
   6   5  -7    4.64    0.73
  -6   5   7    4.71    0.55
   6  -5   7    3.82    0.73
   6   5   7    5.36    0.78
   6  -5  -7    4.06    0.72
  -6   5  -7    3.93    0.77
   6   5  -8    9.47    1.21
  -6   5   8   10.09    0.85
   6  -5   8    9.78    1.02
   6  -5  -8    9.34    0.93
  -6   5  -8    8.90    0.93
   6   5   8    9.55    1.09
   6   5  -9    0.13    0.44
  -6   5   9    0.21    0.34
   6  -5   9    0.34    0.44
   6   5   9    0.41    0.51
   6  -5  -9    0.80    0.38
  -6   5  -9   -0.13    0.52
   6   5 -10    1.25    0.78
  -6   5  10    1.44    0.42
   6  -5  10    2.31    0.64
   6  -5 -10    1.81    0.55
  -6   5 -10    3.17    0.77
   6   5  10    1.64    0.75
   6   5 -11    0.28    0.60
  -6   5  11    0.01    0.34
   6  -5  11    0.48    0.46
   6  -5 -11    0.19    0.39
  -6   5 -11    0.52    0.56
   6   5  11    1.15    0.56
   6   5 -12    0.66    0.74
  -6   5  12    1.20    0.38
   6  -5  12    0.15    0.53
  -6   5 -12    1.03    0.66
   6   5  12    0.14    0.64
   6  -5 -12    0.41    0.44
   6   5 -13    1.20    0.94
  -6   5  13    1.96    0.49
   6  -5  13    1.38    0.69
   6   5  13    2.04    0.81
   6  -5 -13    1.43    0.66
  -6   5 -13    1.64    0.79
   6   5 -14    2.38    0.86
  -6   5  14    1.35    0.51
   6  -5  14    1.49    0.64
   6   5  14   -0.30    0.77
   6  -5 -14   -0.09    0.61
  -6   5 -14    1.70    0.75
   6   5 -15    1.19    0.72
  -6   5 -15    1.64    0.85
   6   5 -16    1.91    0.86
   6  -5  16    1.10    0.68
   6   5  16    0.28    0.84
  -6   5 -16    0.34    0.93
   6   5 -17    1.29    0.95
   6   5  17    1.11    0.94
  -6   5 -17    0.67    0.99
   7   5   0    2.73    0.50
   7   5   0    2.01    0.33
  -7   5   0    2.67    0.52
   7  -5   0    1.99    0.59
   7   5  -1   17.96    1.20
   7   5  -1   17.13    0.76
  -7   5   1   17.66    1.13
   7  -5   1   17.20    1.27
   7   5   1   18.40    1.00
   7   5   1   16.83    0.87
   7  -5  -1   18.29    1.15
  -7   5  -1   17.28    1.20
   7   5  -2    6.28    0.71
   7   5  -2    5.89    0.45
  -7   5   2    6.41    0.67
   7  -5   2    6.12    0.81
   7   5   2    6.20    0.65
   7  -5  -2    6.10    0.68
  -7   5  -2    7.13    0.75
   7   5   2    6.19    0.52
   7   5  -3    0.69    0.50
  -7   5   3    1.15    0.35
   7  -5   3    1.35    0.49
   7   5  -3    1.14    0.22
   7   5   3    0.98    0.27
   7   5   3    1.43    0.39
   7  -5  -3    1.18    0.45
  -7   5  -3    1.34    0.49
   7   5  -4    6.04    0.34
   7   5  -4    5.97    0.84
  -7   5   4    6.54    0.64
   7  -5   4    5.78    0.77
   7   5   4    5.50    0.46
   7   5   4    5.00    0.60
   7  -5  -4    6.50    0.76
  -7   5  -4    5.93    0.70
   7   5  -5    3.10    0.73
  -7   5   5    3.35    0.50
   7  -5   5    3.41    0.66
   7   5   5    3.30    0.33
   7   5   5    3.13    0.65
   7  -5  -5    3.75    0.66
  -7   5  -5    3.27    0.67
   7   5  -6    3.26    0.77
  -7   5   6    3.77    0.51
   7  -5   6    2.98    0.65
   7   5   6    3.53    0.69
   7  -5  -6    3.00    0.68
  -7   5  -6    3.05    0.70
   7   5   6    2.69    0.27
   7   5  -7    4.17    0.87
  -7   5   7    3.79    0.51
   7  -5   7    4.29    0.75
   7   5   7    4.36    0.80
  -7   5  -7    3.86    0.79
   7  -5  -7    3.03    0.79
   7   5  -8   12.97    1.39
  -7   5   8   11.17    0.89
   7  -5   8   11.32    1.17
   7   5   8   10.20    1.26
   7  -5  -8   11.49    1.22
  -7   5  -8   10.85    1.30
  -7   5   9    3.09    0.55
   7  -5   9    2.74    0.75
   7   5  -9    3.43    0.91
  -7   5  -9    3.06    0.85
   7   5   9    3.05    0.88
   7  -5  -9    3.00    0.68
   7   5 -10    2.66    0.92
  -7   5  10    2.86    0.51
   7  -5  10    3.19    0.74
   7   5  10    3.03    0.84
   7  -5 -10    3.26    0.81
  -7   5 -10    2.35    0.88
  -7   5  11    0.32    0.36
   7  -5  11   -0.36    0.47
  -7   5 -11   -0.23    0.59
   7   5  11    0.02    0.57
   7  -5 -11    1.30    0.43
   7   5 -12    0.41    0.70
  -7   5  12    0.60    0.40
   7  -5  12   -0.23    0.52
   7   5  12    0.18    0.69
   7  -5 -12    1.84    0.56
  -7   5 -12    1.97    0.68
  -7   5  13    0.87    0.41
   7  -5  13    0.80    0.66
   7   5 -13    1.34    0.82
  -7   5 -13    1.13    0.62
   7   5  13    1.17    0.76
   7  -5 -13    1.69    0.55
   7   5 -14    0.23    0.93
   7  -5  14    1.39    0.69
   7   5  14    1.14    0.79
   7  -5 -14    1.76    0.69
   7  -5  15    1.77    0.63
   7   5 -15    1.36    0.99
  -7   5 -15    1.21    0.96
   7   5  15    0.34    0.88
   7   5 -16    0.88    0.80
   7  -5  16    0.16    0.63
   7   5  16    0.27    0.78
  -7   5 -16    0.70    0.86
  -7   5 -17    1.87    1.10
   8   5   0    3.84    0.60
   8   5   0    2.34    0.33
   8  -5   0    4.50    0.68
  -8   5   0    4.56    0.60
   8   5  -1    1.92    0.30
   8   5  -1    1.72    0.52
  -8   5   1    2.00    0.41
   8  -5   1    1.65    0.55
   8   5   1    1.53    0.32
   8   5   1    1.55    0.41
  -8   5  -1    0.82    0.50
   8  -5  -1    1.14    0.56
   8   5  -2   11.40    1.07
   8   5  -2   11.36    0.57
   8  -5   2   11.47    1.05
  -8   5   2   11.82    0.84
   8   5   2   11.13    0.83
   8   5   2   11.81    0.86
   8  -5  -2   11.71    1.08
  -8   5  -2   12.39    1.08
   8   5  -3    0.19    0.38
   8   5  -3    0.08    0.14
  -8   5   3    0.04    0.26
   8  -5   3    0.31    0.39
   8   5   3    0.73    0.29
   8   5   3   -0.04    0.25
   8  -5  -3    0.34    0.38
  -8   5  -3    0.37    0.38
   8   5  -4    9.74    1.09
  -8   5   4    9.84    0.76
   8  -5   4   10.71    1.06
  -8   5  -4   10.82    1.07
   8   5   4    8.92    0.61
   8   5   4    9.42    0.87
   8  -5  -4   10.19    1.01
   8   5  -5    4.45    0.86
  -8   5   5    4.41    0.54
   8  -5   5    4.66    0.78
   8   5   5    4.00    0.38
   8   5   5    4.78    0.74
  -8   5  -5    3.80    0.79
   8  -5  -5    4.68    0.80
   8   5  -6    4.53    0.89
  -8   5   6    4.46    0.56
   8  -5   6    5.12    0.77
  -8   5  -6    4.86    0.82
   8   5   6    3.88    0.78
   8   5   6    3.51    0.36
   8  -5  -6    4.04    0.81
   8   5  -7    2.06    0.85
  -8   5   7    2.85    0.46
   8  -5   7    3.76    0.75
   8   5   7    2.76    0.78
   8  -5  -7    3.59    0.81
  -8   5  -7    3.27    0.80
   8   5  -8    4.04    1.00
  -8   5   8    3.65    0.51
   8  -5   8    3.84    0.79
   8   5   8    3.79    0.91
   8  -5  -8    4.99    0.90
  -8   5  -8    3.94    0.94
   8   5  -9    1.94    0.81
  -8   5   9    1.41    0.39
   8  -5   9    1.65    0.65
   8   5   9    2.09    0.73
  -8   5  -9    1.70    0.77
   8  -5  -9    1.06    0.71
   8   5 -10    0.29    0.66
  -8   5  10    0.20    0.30
   8  -5  10    0.61    0.52
  -8   5 -10    0.98    0.62
   8   5  10    0.44    0.62
   8  -5 -10    1.22    0.62
   8   5 -11    1.26    0.86
  -8   5  11    1.65    0.42
   8  -5  11    2.11    0.69
  -8   5 -11    1.96    0.79
   8   5  11    1.94    0.83
   8  -5 -11    1.92    0.78
   8   5 -12   -0.41    0.72
   8  -5  12    0.16    0.56
   8   5  12    0.37    0.54
   8  -5 -12    0.35    0.59
  -8   5 -12    2.47    0.68
   8   5 -13    0.39    0.70
   8  -5  13    0.04    0.47
   8   5  13    1.31    0.67
   8  -5 -13    0.11    0.50
   8   5 -14   -0.46    0.82
   8  -5  14    0.77    0.54
  -8   5 -14    1.46    0.74
   8   5  14    0.13    0.76
   8   5 -15    1.54    1.03
   8  -5  15    0.58    0.67
   8   5  15    2.00    0.91
   8   5 -16   -0.60    0.94
   8   5  16   -0.58    0.81
  -8   5 -16    2.31    0.86
   9  -5   0    2.40    0.55
  -9   5   0    2.65    0.62
   9   5   0    3.26    0.60
   9   5  -1    2.42    0.66
   9   5  -1    2.07    0.29
  -9   5   1    3.07    0.57
   9  -5   1    2.94    0.69
   9   5   1    2.97    0.40
   9  -5  -1    3.02    0.67
  -9   5  -1    2.70    0.63
   9   5   1    3.03    0.55
  -9   5   2    4.61    0.65
   9   5  -2    4.04    0.32
   9  -5   2    5.05    0.81
   9   5  -2    4.85    0.81
   9   5   2    4.08    0.58
   9   5   2    5.42    0.54
   9  -5  -2    5.25    0.82
  -9   5  -2    5.27    0.77
   9  -5   3    0.84    0.44
   9   5  -3    0.84    0.55
  -9   5   3    0.85    0.34
   9   5   3    0.87    0.38
   9  -5  -3    0.83    0.52
  -9   5  -3    0.70    0.52
   9   5   3    0.91    0.33
   9   5  -4    0.65    0.57
  -9   5   4    1.14    0.35
   9  -5   4    0.93    0.53
   9   5   4    0.77    0.31
   9   5   4    0.58    0.39
   9  -5  -4    1.04    0.54
  -9   5  -4    0.91    0.44
   9  -5   5    2.17    0.65
   9   5  -5    1.60    0.70
  -9   5   5    1.57    0.40
   9   5   5    1.76    0.59
   9  -5  -5    2.03    0.66
  -9   5  -5    1.14    0.61
   9   5   5    1.22    0.36
   9   5  -6    2.16    0.74
   9  -5   6    1.46    0.67
  -9   5   6    1.80    0.40
   9   5   6    1.15    0.33
   9   5   6    2.77    0.65
   9  -5  -6    2.12    0.69
  -9   5  -6    1.16    0.67
   9  -5   7    6.81    0.96
   9   5  -7    5.65    1.12
  -9   5   7    4.74    0.60
   9  -5  -7    6.48    1.03
  -9   5  -7    6.84    1.06
   9   5   7    5.84    1.01
  -9   5   8    2.05    0.43
   9   5  -8    2.05    0.87
   9  -5   8    2.23    0.72
   9   5   8    2.69    0.81
   9  -5  -8    1.95    0.79
  -9   5  -8    3.25    0.82
   9   5  -9    0.48    0.62
  -9   5   9    0.62    0.30
   9  -5   9   -0.03    0.52
   9   5   9    0.45    0.60
   9  -5  -9    0.54    0.62
  -9   5  -9    0.55    0.51
  -9   5  10    0.78    0.34
   9  -5  10    1.01    0.60
   9   5 -10    0.74    0.74
   9   5  10    0.83    0.71
   9  -5 -10    1.11    0.74
  -9   5 -10    0.91    0.72
   9  -5  11    1.19    0.63
   9   5 -11    0.42    0.81
   9   5  11    0.32    0.78
   9  -5 -11    1.70    0.78
  -9   5 -11    1.49    0.74
   9   5 -12    0.23    0.57
   9  -5  12    0.24    0.52
   9   5  12   -0.11    0.69
   9  -5 -12    0.26    0.61
  -9   5 -12    1.12    0.66
   9  -5  13    0.27    0.52
   9   5 -13    1.21    0.75
   9   5  13    0.83    0.72
   9  -5 -13    0.07    0.63
  -9   5 -13    0.81    0.57
  -9   5 -13   -0.34    0.56
   9   5 -14    1.46    0.98
   9  -5  14    0.82    0.68
  -9   5 -14    1.87    0.93
   9   5  14    0.72    0.94
   9  -5 -14    2.28    0.76
   9   5 -15    0.26    0.95
   9   5  15    0.29    0.90
  -9   5 -15    1.68    0.95
   9   5  16    1.33    0.96
  -9   5 -16    0.33    0.84
  10   5   0    3.51    0.66
  10   5   0    2.40    0.34
  10  -5   0    2.25    0.74
 -10   5   0    3.02    0.65
  10   5  -1    0.17    0.19
 -10   5   1    0.07    0.36
  10  -5   1    0.03    0.42
  10   5  -1    0.08    0.40
  10   5   1   -0.06    0.35
  10  -5  -1    0.46    0.42
 -10   5  -1    0.65    0.38
  10   5   1   -0.05    0.21
  10   5  -2    1.46    0.66
 -10   5   2    1.25    0.51
  10  -5   2    2.67    0.67
  10   5   2    1.41    0.52
  10   5   2    1.70    0.40
  10  -5  -2    1.08    0.65
 -10   5  -2    2.30    0.59
  10   5  -3    0.00    0.48
 -10   5   3    0.96    0.33
  10  -5   3   -0.15    0.38
  10   5   3    0.19    0.28
  10   5   3   -0.08    0.30
  10  -5  -3    0.04    0.46
 -10   5  -3    0.41    0.43
  10   5  -4    1.23    0.68
 -10   5   4    0.81    0.38
  10  -5   4    1.35    0.62
  10   5   4    1.24    0.38
  10   5   4    1.05    0.53
  10  -5  -4    1.85    0.62
 -10   5  -4    2.57    0.59
 -10   5   5    0.62    0.29
  10  -5   5    0.17    0.40
  10   5  -5   -0.11    0.53
  10   5   5    0.26    0.28
 -10   5  -5    0.25    0.47
  10  -5  -5    0.02    0.52
  10   5   5    0.51    0.41
  10   5  -6    0.20    0.57
  10  -5   6    0.84    0.52
 -10   5   6    0.64    0.29
  10   5   6    0.18    0.25
  10   5   6   -0.06    0.50
  10  -5  -6    0.27    0.57
 -10   5  -6    0.94    0.55
  10   5  -7   -0.01    0.56
 -10   5   7    0.07    0.25
  10  -5   7    0.43    0.46
  10   5   7    0.66    0.48
  10  -5  -7   -0.03    0.53
 -10   5  -7    0.19    0.51
  10   5  -8    0.65    0.77
 -10   5   8    1.21    0.36
  10  -5   8    0.65    0.63
  10  -5  -8    1.52    0.73
 -10   5  -8    1.46    0.73
  10   5   8    1.46    0.69
  10  -5   9    0.17    0.63
  10   5  -9   -0.47    0.77
  10   5   9    1.49    0.74
  10  -5  -9    2.14    0.74
 -10   5  -9    2.46    0.73
  10   5 -10    1.83    0.71
  10  -5  10    0.81    0.69
  10   5  10    1.30    0.83
  10  -5 -10    0.96    0.91
 -10   5 -10    1.89    0.80
  10  -5  11    1.03    0.62
  10   5  11   -0.02    0.76
  10  -5 -11    1.19    0.82
  10   5 -12    1.38    0.82
  10  -5  12    0.05    0.66
  10  -5 -12    1.30    0.77
  10   5  12    0.39    0.82
  10   5 -13   -0.46    0.90
  10  -5  13    0.66    0.71
  10   5  13    0.30    0.91
  10  -5 -13    0.99    0.81
 -10   5 -13    2.90    0.84
  10  -5  14    0.70    0.73
  10   5 -15    1.28    0.87
  10   5  15    1.03    1.00
 -10   5 -15    0.76    1.04
  11   5   0    0.53    0.23
  11   5   0    0.08    0.50
 -11   5   0    0.98    0.39
  11  -5   0   -0.20    0.57
 -11   5   1    0.90    0.53
  11   5  -1    1.25    0.64
  11  -5   1    0.91    0.66
  11   5   1    0.81    0.53
  11  -5  -1    1.19    0.64
  11   5   1    1.77    0.34
 -11   5  -1    0.87    0.56
  11   5  -2    0.27    0.55
 -11   5   2    0.60    0.43
  11  -5   2    0.18    0.43
  11   5   2    0.15    0.31
  11   5   2    0.67    0.38
  11  -5  -2    0.13    0.53
 -11   5  -2    1.00    0.41
  11   5  -3    0.32    0.63
  11  -5   3    0.88    0.57
  11   5   3    0.32    0.36
  11  -5  -3    0.37    0.56
  11   5   3    0.80    0.35
 -11   5  -3    0.64    0.51
  11  -5   4    0.42    0.63
 -11   5   4    0.69    0.39
  11   5  -4    0.78    0.72
  11   5   4    1.59    0.40
  11   5   4    0.90    0.46
 -11   5  -4    1.19    0.59
  11  -5  -4    0.83    0.65
  11  -5   5    1.46    0.74
 -11   5   5    1.71    0.42
  11   5  -5    1.70    0.79
  11   5   5    1.30    0.42
  11  -5  -5    2.11    0.77
  11   5   5    1.53    0.57
 -11   5  -5    3.77    0.74
  11   5  -6    1.17    0.70
  11  -5   6    1.38    0.61
 -11   5   6    0.67    0.34
  11  -5  -6    0.17    0.67
  11   5   6    0.39    0.59
 -11   5  -6    1.39    0.68
  11   5  -7    1.15    0.61
  11  -5   7    0.12    0.61
  11   5   7    1.12    0.64
  11  -5  -7    1.36    0.71
 -11   5  -7    0.28    0.69
  11  -5   8   -0.05    0.57
  11   5  -8    0.00    0.74
  11   5   8    0.34    0.63
  11  -5  -8    1.07    0.70
 -11   5  -8    1.87    0.69
  11  -5   9   -0.11    0.55
  11   5  -9   -0.17    0.64
  11   5   9    0.62    0.63
  11  -5  -9    2.04    0.66
 -11   5  -9   -0.24    0.63
  11   5 -10    0.13    0.76
  11  -5  10    0.49    0.62
  11   5  10    0.94    0.76
  11  -5 -10    2.22    0.81
 -11   5 -10   -0.27    0.73
  11   5 -11    0.00    0.61
  11  -5  11   -0.28    0.52
  11   5  11    0.80    0.63
  11  -5  12   -0.49    0.60
  11   5 -12    0.13    0.72
  11  -5 -12    0.27    0.74
  11   5  12    1.62    0.76
  11  -5  13   -0.14    0.63
 -11   5 -13   -0.26    0.75
  11   5  13    1.48    0.79
  11   5 -14    0.50    1.09
  11   5  14    0.89    1.05
  11  -5 -14    2.27    1.07
 -11   5 -14    1.58    1.11
  12  -5   0    1.42    0.57
 -12   5   0   -0.16    0.41
  12   5   0    0.90    0.56
  12   5  -1   -0.32    0.59
  12  -5   1    1.53    0.60
  12   5   1    0.90    0.32
  12  -5  -1    0.76    0.50
 -12   5  -1    0.00    0.51
  12   5   1    0.94    0.55
  12   5  -2    1.78    0.75
  12  -5   2    1.60    0.73
 -12   5   2    3.49    0.55
  12   5   2    0.99    0.41
  12  -5  -2    1.38    0.72
 -12   5  -2    1.24    0.63
  12   5   2    1.00    0.62
 -12   5   3    1.19    0.43
  12   5  -3   -0.01    0.70
  12  -5   3    0.59    0.64
  12   5   3   -0.10    0.42
  12  -5  -3    0.50    0.68
 -12   5  -3    2.07    0.57
  12   5   3    1.19    0.45
  12   5  -4    0.50    0.65
  12  -5   4    0.18    0.55
  12   5   4    0.37    0.38
  12  -5  -4    0.96    0.60
  12   5   4    0.14    0.38
  12   5  -5    0.17    0.63
 -12   5   5    0.61    0.34
  12  -5   5   -0.19    0.56
  12   5   5    0.48    0.49
  12  -5  -5    0.80    0.59
 -12   5  -5    0.11    0.57
  12   5   5    0.05    0.34
  12   5  -6   -0.33    0.62
  12  -5   6    1.17    0.56
  12   5   6    0.36    0.47
 -12   5  -6   -0.37    0.59
  12  -5  -6    0.44    0.60
  12   5  -7    0.20    0.77
  12  -5   7   -0.18    0.67
  12   5   7    0.41    0.59
 -12   5  -7    3.68    0.73
  12   5  -8    0.12    0.64
  12  -5   8   -0.07    0.56
 -12   5  -8    0.73    0.63
  12   5   8    0.29    0.59
  12   5  -9    0.16    0.83
  12  -5   9    0.09    0.59
  12   5   9    1.45    0.67
  12  -5  -9    1.10    0.79
 -12   5  -9    1.81    0.77
  12   5 -10   -0.29    0.81
  12  -5  10    0.93    0.63
  12  -5 -10   -0.49    0.86
  12   5  10    1.74    0.80
  12   5 -11    0.01    0.93
  12  -5  11    0.73    0.74
  12  -5 -11    3.28    1.00
  12   5 -12    2.40    0.97
  12  -5  12    0.25    0.68
  12   5  12   -0.26    0.97
  12  -5 -12    1.91    1.00
 -12   5 -12    1.47    0.91
  12   5 -13    1.31    0.84
  12   5  13    1.59    1.02
 -12   5 -13    0.57    1.09
  13  -5   0    1.32    0.71
  13   5   0    1.31    0.69
  13  -5   1    1.71    0.65
  13   5  -1    0.68    0.67
  13  -5  -1    1.16    0.65
 -13   5  -1    0.89    0.48
  13   5   1   -0.29    0.51
  13  -5   2    0.92    0.68
 -13   5   2    1.23    0.50
  13  -5  -2    0.12    0.70
 -13   5  -2    0.77    0.54
  13   5   2    1.44    0.63
 -13   5   3    1.51    0.45
  13  -5   3    1.14    0.66
  13   5  -3   -0.40    0.66
  13  -5  -3    0.00    0.66
 -13   5  -3    1.50    0.55
  13   5   3   -0.07    0.37
  13  -5   4    0.93    0.68
  13   5  -4    0.18    0.76
 -13   5  -4    1.89    0.62
  13  -5  -4   -0.28    0.73
  13  -5   5    1.22    0.71
  13   5  -5    0.44    0.84
 -13   5  -5    0.88    0.66
  13   5   5    1.19    0.54
  13  -5   6    1.76    0.76
  13   5  -6   -0.20    0.83
  13  -5  -6    0.13    0.80
 -13   5  -6    2.24    0.80
  13   5   6    1.32    0.68
  13   5  -7    0.39    0.77
  13  -5   7    1.16    0.72
  13  -5  -7    0.58    0.80
 -13   5  -7    1.46    0.77
  13   5   7    0.73    0.72
  13  -5   8    0.77    0.82
  13   5  -8    0.66    0.87
  13  -5  -8    1.37    0.85
 -13   5  -8    0.47    0.80
  13   5   8    0.95    0.67
  13  -5   9    0.07    0.49
  13   5  -9   -0.37    0.72
  13  -5  -9    0.55    0.73
  13   5   9    0.32    0.63
  13  -5  10    2.68    0.81
  13   5 -10   -0.53    0.93
  13  -5 -10    2.01    1.02
 -13   5 -10   -0.34    0.91
  13   5  10    1.21    0.90
  13  -5  11   -0.39    0.83
  13   5 -11    1.73    0.97
  13  -5 -11    0.73    1.04
 -13   5 -11    1.57    0.92
  13   5  11    1.53    0.96
  14   5   0    1.25    0.81
 -14   5   0    1.48    0.65
  14   5  -1   -0.39    0.74
  14  -5   1    0.81    0.74
 -14   5   1    1.27    0.50
  14  -5  -1    2.56    0.77
  14   5   1    0.86    0.63
  14   5  -2   -0.06    0.75
  14  -5   2    1.85    0.70
  14   5   2    0.21    0.66
 -14   5  -2    1.13    0.65
  14  -5   3    1.73    0.68
  14   5  -3    0.06    0.80
  14   5   3    0.00    0.56
 -14   5  -3    1.09    0.67
  14  -5  -3    0.82    0.72
  14   5  -4   -0.40    0.79
  14  -5   4    1.18    0.67
  14  -5  -4    0.02    0.58
 -14   5  -4    1.10    0.59
  14   5  -5    1.04    1.00
  14   5   5    1.53    0.59
 -14   5  -5    1.81    0.88
  14  -5  -5    2.56    0.92
  14  -5   6    0.70    0.82
  14   5  -6    0.24    0.85
  14  -5  -6    1.35    0.89
  14   5   6    0.93    0.74
 -14   5  -6    2.98    0.85
  14   5  -7    1.25    0.91
  14  -5   7   -0.23    0.81
  14   5   7    1.98    0.82
  14  -5  -7    1.09    0.92
 -14   5  -7    2.28    0.89
  14  -5   8    0.46    0.87
  14   5  -8    1.85    0.98
  14   5   8    1.56    0.90
  14  -5  -8    0.75    0.81
 -14   5  -8    2.53    0.94
  14   5  -9    0.32    1.04
  14  -5   9    1.28    0.92
  14  -5  -9    0.91    1.09
 -14   5  -9    2.50    0.97
  14   5   9    1.39    0.96
  14   5  10    1.77    0.93
 -14   5 -10   -0.29    0.93
  15   5   0   -0.40    0.67
  15  -5   0    1.53    0.62
  15  -5   1    5.88    0.92
  15   5  -1   -0.35    0.98
  15  -5  -1   -0.09    0.95
  15  -5   2    1.60    0.72
  15   5  -2   -0.32    0.80
 -15   5  -2   -0.46    0.66
  15  -5  -2    2.04    0.74
  15   5   2   -0.10    0.60
  15   5  -3    0.60    1.00
  15  -5   3    1.68    0.87
 -15   5  -3    1.76    0.87
  15  -5  -3    3.16    0.96
  15   5  -4   -0.06    0.98
  15  -5  -4    1.95    0.91
 -15   5  -4    1.21    0.81
  15   5  -5   -0.15    0.94
  15  -5   5    1.70    0.80
  15  -5  -5    1.37    0.88
 -15   5  -5    0.20    0.79
  15  -5   6    1.62    0.93
  15   5  -6    0.00    1.03
 -15   5  -6    3.96    0.97
  15  -5  -6    0.93    1.06
  15   5  -7   -0.26    0.89
  15  -5   7    0.95    0.75
 -15   5  -7    2.10    0.89
  16   5   0    2.02    1.08
  16  -5   1    3.67    0.94
  16   5  -1    1.21    0.96
  16   5   1   -0.47    0.83
  16  -5  -1    1.31    0.96
  16   5  -2    1.17    0.98
  16  -5   2    1.47    1.03
  16  -5  -2    3.50    1.08
  16   5  -3   -0.08    1.07
  16  -5   3    1.06    0.89
  16  -5  -3    2.88    1.00
   0   6   0   55.26    1.94
   0  -6   0   57.33    1.87
   0   6  -1   -0.01    0.21
   0  -6   1    0.11    0.20
   0   6   1    0.01    0.21
   0  -6  -1    0.11    0.17
   0   6  -2   10.77    0.64
   0  -6   2   10.38    0.70
   0   6   2   11.23    0.78
   0  -6  -2   10.98    0.54
   0   6  -3    0.00    0.18
   0  -6   3    0.17    0.15
   0   6   3    0.22    0.19
   0  -6  -3   -0.10    0.09
   0   6  -4   23.98    1.23
   0   6  -4   26.95    1.23
   0   6   4   25.83    1.21
   0  -6  -4   27.06    0.86
   0  -6  -5   -0.04    0.09
   0   6   5    0.22    0.23
   0   6  -5   -0.18    0.24
   0   6  -5    0.08    0.19
   0   6  -6    1.28    0.44
   0   6  -6    0.85    0.36
   0   6   6    1.91    0.43
   0  -6  -6    1.00    0.19
   0   6  -7    0.04    0.22
   0   6  -7    0.07    0.27
   0   6   7   -0.08    0.26
   0  -6  -7    0.00    0.09
   0   6  -8    1.78    0.44
   0   6  -8    1.78    0.57
   0   6   8    1.81    0.54
   0  -6  -8    1.52    0.17
   0   6  -9    0.00    0.33
   0   6  -9    1.09    0.45
   0   6   9    0.29    0.42
   0   6 -10    0.06    0.38
   0   6  10    0.94    0.48
   0   6 -10    0.75    0.50
   0   6  11   -0.16    0.44
   0   6 -11    0.04    0.41
   0   6 -11    0.78    0.39
   0   6 -12    6.56    1.12
   0   6 -12    7.20    0.97
   0   6  12    6.41    1.03
   0   6 -13    1.39    0.53
   0   6  13   -0.29    0.58
   0   6 -14    1.11    0.57
   0   6 -14    0.96    0.54
   0   6  14   -0.38    0.60
   0   6 -15    1.82    0.68
   0   6  15    0.96    0.72
   0   6 -16   -0.28    0.48
   0   6  16    0.49    0.52
   0   6 -17    0.67    0.71
   0  -6  17    0.70    0.69
   0   6  17    0.08    0.69
   0  -6  18    0.05    0.81
   0   6  18    1.33    0.70
   1  -6   0    3.32    0.41
  -1   6   0    3.18    0.44
   1   6   0    3.38    0.45
  -1  -6   0    2.86    0.37
  -1  -6  -1   13.19    0.66
  -1   6   1   12.60    0.84
   1  -6   1   13.34    0.81
   1   6  -1   12.58    0.76
   1   6  -1   13.55    0.79
   1  -6  -1   12.71    0.66
  -1   6  -1   12.85    0.80
   1   6   1   12.02    0.77
  -1  -6  -2    5.46    0.36
  -1   6   2    5.08    0.57
   1  -6   2    5.86    0.58
   1   6  -2    5.51    0.51
   1   6  -2    5.14    0.55
   1   6   2    4.87    0.56
   1  -6  -2    6.33    0.46
  -1   6  -2    5.09    0.49
  -1  -6  -3    0.96    0.18
   1   6  -3    1.13    0.38
  -1   6   3    0.92    0.38
   1  -6   3    0.60    0.36
   1   6  -3    1.08    0.31
   1   6   3    1.47    0.38
   1  -6  -3    1.17    0.25
  -1   6  -3    1.69    0.36
  -1  -6  -4    6.29    0.32
   1   6  -4    6.22    0.65
   1   6  -4    5.66    0.54
  -1   6   4    6.12    0.62
   1  -6   4    5.39    0.64
   1   6   4    6.52    0.65
  -1   6  -4    6.19    0.63
  -1  -6  -5    7.89    0.35
   1   6  -5    8.28    0.81
   1   6  -5    8.10    0.59
  -1   6   5    7.82    0.64
   1  -6   5    7.70    0.72
   1   6   5    8.22    0.77
   1  -6  -5    7.93    0.46
  -1   6  -5    8.37    0.70
  -1  -6  -6   -0.02    0.09
   1   6  -6   -0.03    0.20
  -1   6   6    0.65    0.29
   1  -6   6   -0.16    0.29
   1   6  -6    0.86    0.33
   1   6   6   -0.01    0.31
   1  -6  -6    0.44    0.13
  -1   6  -6   -0.01    0.27
   1   6  -7    3.51    0.50
  -1   6   7    3.93    0.62
   1  -6   7    2.85    0.58
   1   6  -7    4.87    0.69
   1   6   7    3.26    0.53
   1  -6  -7    3.66    0.32
  -1   6  -7    4.48    0.59
  -1   6   8    1.30    0.43
   1  -6   8    0.43    0.43
   1   6  -8    0.86    0.34
   1   6  -8    0.42    0.47
   1   6   8    0.81    0.37
   1  -6  -8    0.56    0.19
  -1   6  -8    0.48    0.38
   1   6  -9    5.42    0.87
   1   6  -9    5.53    0.63
  -1   6   9    4.77    0.76
   1  -6   9    5.13    0.76
   1   6   9    5.26    0.78
   1  -6  -9    4.71    0.38
  -1   6  -9    5.67    0.70
   1   6 -10    1.70    0.70
   1   6 -10    2.27    0.42
  -1   6  10    1.65    0.58
   1  -6  10    1.68    0.62
   1   6  10    2.02    0.60
  -1   6 -10    1.64    0.53
  -1   6  11    1.92    0.61
   1  -6  11    0.99    0.61
   1   6 -11    1.45    0.70
   1   6 -11    1.31    0.46
   1   6  11    1.05    0.61
  -1   6 -11    1.58    0.51
  -1   6  12    1.71    0.66
   1  -6  12    1.37    0.68
   1   6 -12    1.58    0.77
   1   6 -12    1.58    0.59
   1   6  12    1.19    0.55
  -1   6 -12    1.89    0.66
  -1   6  13    0.27    0.57
   1  -6  13    1.20    0.57
   1   6 -13    0.25    0.44
   1   6 -13   -0.12    0.64
   1   6  13    0.87    0.58
  -1   6 -13    0.91    0.48
  -1   6  14    0.81    0.68
   1  -6  14    1.24    0.68
   1   6 -14    1.09    0.75
   1   6 -14    1.43    0.52
   1   6  14    0.53    0.70
  -1   6 -14    1.09    0.65
  -1   6  15    0.60    0.60
   1  -6  15    0.66    0.68
   1   6 -15    1.04    0.73
   1   6 -15    0.87    0.55
   1   6  15    1.34    0.69
  -1   6 -15    1.07    0.67
   1   6 -16   -0.14    0.73
   1   6 -16    1.08    0.66
   1   6  16   -0.38    0.67
  -1   6 -16    1.61    0.72
   1   6 -17    0.93    0.80
   1   6  17    0.67    0.76
  -1   6 -17    0.50    0.72
   1   6 -18    0.15    0.42
   1   6  18   -0.49    0.50
  -1   6 -18    0.23    0.45
   2   6   0    0.10    0.24
   2  -6   0    0.50    0.25
  -2   6   0    0.04    0.28
   2   6  -1   22.77    1.06
   2   6  -1   22.96    1.13
  -2   6   1   22.47    1.16
   2  -6   1   21.83    1.12
   2   6   1   23.52    0.99
   2   6   1   22.92    1.12
   2  -6  -1   24.85    1.08
  -2   6  -1   23.27    1.09
   2   6  -2    5.52    0.51
   2   6  -2    6.16    0.61
  -2   6   2    5.88    0.64
   2  -6   2    6.43    0.60
  -2   6  -2    6.19    0.55
   2   6   2    6.41    0.60
   2  -6  -2    5.77    0.51
   2   6  -3   20.83    0.92
   2   6  -3   19.98    1.06
  -2  -6  -3   21.01    0.73
  -2   6   3   20.55    1.12
   2  -6   3   21.46    1.13
  -2   6  -3   20.56    1.14
   2   6   3   21.46    1.13
   2  -6  -3   20.23    0.90
   2   6  -4    0.81    0.40
   2   6  -4    0.75    0.25
  -2  -6  -4    0.82    0.16
  -2   6   4    0.47    0.31
   2  -6   4    1.59    0.38
  -2   6  -4    1.91    0.39
   2   6   4    0.49    0.39
   2  -6  -4    0.59    0.25
   2   6  -5    5.16    0.70
   2   6  -5    5.33    0.46
  -2  -6  -5    5.61    0.26
  -2   6   5    5.69    0.56
   2  -6   5    6.40    0.65
   2   6   5    5.63    0.66
   2  -6  -5    4.95    0.37
  -2   6  -5    4.85    0.62
   2  -6   6    3.24    0.53
   2   6  -6    2.65    0.59
   2   6  -6    2.74    0.39
  -2  -6  -6    2.80    0.16
  -2   6   6    2.85    0.53
  -2   6  -6    3.15    0.52
   2   6   6    3.72    0.56
   2  -6  -6    2.78    0.30
   2   6  -7    3.30    0.64
   2   6  -7    3.18    0.39
  -2   6   7    2.78    0.56
   2  -6   7    3.23    0.56
  -2   6  -7    2.93    0.57
   2   6   7    2.45    0.59
   2  -6  -7    3.22    0.33
   2   6  -8    1.46    0.36
   2   6  -8    0.84    0.54
  -2   6   8    0.71    0.38
   2  -6   8    1.19    0.47
   2   6   8    1.11    0.41
   2  -6  -8    1.08    0.28
  -2   6  -8    1.34    0.45
   2   6  -9    1.62    0.37
   2   6  -9    2.01    0.54
   2  -6   9    1.18    0.60
  -2   6   9    2.15    0.56
   2   6   9    1.35    0.60
   2  -6  -9    2.07    0.33
  -2   6  -9    1.62    0.56
   2  -6  10    7.13    0.93
   2   6 -10    5.77    0.67
   2   6 -10    6.91    1.01
  -2   6  10    5.71    0.87
  -2   6 -10    6.69    0.85
   2   6  10    7.39    1.01
   2  -6 -10    7.34    0.54
   2   6 -11    0.82    0.35
   2   6 -11    0.05    0.60
  -2   6  11    0.92    0.51
   2  -6  11    0.79    0.54
   2   6  11    0.51    0.60
  -2   6 -11    0.06    0.52
   2   6 -12    2.37    0.84
   2   6 -12    2.65    0.58
  -2   6  12    2.61    0.72
   2  -6  12    3.74    0.77
  -2   6 -12    1.70    0.69
   2   6  12    2.39    0.84
   2   6 -13    2.25    0.64
   2   6 -13    2.69    0.87
  -2   6  13    2.43    0.76
   2  -6  13    2.80    0.82
  -2   6 -13    2.89    0.80
   2   6  13    1.29    0.87
   2   6 -14    1.11    0.45
   2   6 -14    0.25    0.70
  -2   6  14    0.61    0.61
   2  -6  14    0.20    0.65
   2   6  14    0.31    0.71
  -2   6 -14    1.00    0.61
   2   6 -15    0.23    0.71
   2   6 -15    1.55    0.53
  -2   6  15   -0.03    0.63
   2  -6  15   -0.09    0.65
   2   6  15    1.58    0.74
  -2   6 -15    0.25    0.66
   2   6 -16    1.12    0.84
   2  -6  16   -0.25    0.73
   2   6  16    2.24    0.83
  -2   6 -16    1.14    0.69
   2   6 -17    0.55    0.73
   2  -6  17    0.44    0.70
  -2   6 -17    0.12    0.78
   2   6 -18    0.48    0.79
   2  -6  18   -0.50    0.74
   2   6  18   -0.11    0.82
  -2   6 -18    1.65    0.78
   3   6   0   15.65    0.89
   3   6   0   15.00    0.80
   3  -6   0   16.27    0.95
  -3   6   0   13.87    0.98
   3   6  -1   10.76    0.77
   3   6  -1   10.76    0.69
  -3   6   1   10.62    0.83
   3  -6   1   10.45    0.81
   3   6   1   10.93    0.62
   3   6   1   10.62    0.75
   3  -6  -1   11.47    0.77
  -3   6  -1   11.16    0.86
   3   6  -2    7.47    0.55
   3   6  -2    7.28    0.69
  -3   6   2    7.49    0.70
   3  -6   2    6.88    0.69
   3   6   2    8.14    0.48
   3   6   2    7.42    0.68
   3  -6  -2    7.37    0.62
  -3   6  -2    7.80    0.74
   3   6  -3   10.48    0.60
   3   6  -3   10.95    0.86
  -3   6   3   11.08    0.83
   3  -6   3   10.07    0.82
   3   6   3    9.92    0.49
   3   6   3    9.31    0.71
   3  -6  -3   10.43    0.70
  -3   6  -3   10.46    0.85
   3   6  -4    0.07    0.19
   3   6  -4   -0.04    0.24
  -3  -6  -4    0.14    0.11
  -3   6   4    0.11    0.28
   3  -6   4    0.15    0.23
   3   6   4    0.04    0.28
   3  -6  -4    0.04    0.21
  -3   6  -4    0.03    0.28
   3   6  -5    2.25    0.51
   3   6  -5    1.62    0.28
  -3  -6  -5    1.63    0.14
  -3   6   5    1.38    0.43
   3  -6   5    1.73    0.46
   3   6   5    2.64    0.48
   3  -6  -5    1.45    0.30
  -3   6  -5    1.77    0.47
   3   6  -6    0.40    0.25
   3   6  -6    0.26    0.44
  -3   6   6    0.52    0.37
   3  -6   6    0.30    0.38
   3   6   6    0.90    0.41
   3  -6  -6    1.16    0.24
  -3   6  -6    0.82    0.41
   3   6  -7    8.04    0.92
   3   6  -7    8.70    0.59
  -3   6   7    8.65    0.79
   3  -6   7    7.97    0.85
   3   6   7    7.69    0.86
   3  -6  -7    7.51    0.56
  -3   6  -7    8.30    0.87
   3   6  -8    0.60    0.25
   3   6  -8    0.94    0.51
  -3   6   8    1.37    0.42
   3  -6   8    0.76    0.46
   3   6   8    1.42    0.52
   3  -6  -8    0.64    0.25
  -3   6  -8    0.71    0.46
   3   6  -9    0.64    0.31
   3   6  -9    2.23    0.68
  -3   6   9    2.50    0.55
   3  -6   9    2.09    0.59
   3   6   9    2.66    0.54
   3  -6  -9    1.77    0.33
  -3   6  -9    2.77    0.57
   3   6 -10    4.65    0.96
  -3   6  10    4.86    0.78
   3  -6  10    4.53    0.83
   3   6  10    4.05    0.94
   3  -6 -10    5.63    0.56
  -3   6 -10    5.11    0.82
   3   6 -11    2.71    0.86
  -3   6  11    2.82    0.68
   3  -6  11    3.15    0.79
   3   6  11    2.61    0.84
   3  -6 -11    2.30    0.41
  -3   6 -11    3.05    0.76
   3   6 -12    0.63    0.64
  -3   6  12    0.06    0.44
   3  -6  12    1.91    0.58
   3   6  12    0.26    0.63
  -3   6 -12   -0.01    0.59
   3   6 -13    1.28    0.77
  -3   6  13    1.54    0.67
   3  -6  13    1.22    0.74
   3   6  13    1.57    0.66
  -3   6 -13    1.77    0.76
   3   6 -14    1.20    0.45
   3   6 -14    1.45    0.75
  -3   6  14   -0.20    0.64
   3  -6  14    1.01    0.71
   3   6  14    1.80    0.79
  -3   6 -14    1.06    0.70
   3   6 -15    2.28    0.88
  -3   6  15    1.60    0.66
   3  -6  15    1.21    0.81
   3   6  15    1.79    0.90
  -3   6 -15    1.37    0.81
   3   6 -16    0.81    0.78
  -3   6  16    1.02    0.66
   3  -6  16   -0.13    0.72
   3   6  16    1.37    0.81
  -3   6 -16    0.89    0.73
   3   6 -17   -0.57    0.94
  -3   6  17    1.43    0.80
   3  -6  17    1.70    0.80
   3   6  17    2.08    0.98
  -3   6 -17    1.62    0.97
   3   6 -18    1.46    1.09
   3   6  18    1.56    1.10
  -3   6 -18    2.78    1.14
   4  -6   0    6.47    0.71
   4   6   0    6.36    0.61
   4   6   0    6.83    0.60
  -4   6   0    6.65    0.74
   4  -6   1   32.25    1.57
   4   6  -1   31.18    1.29
   4   6  -1   31.31    1.41
  -4   6   1   31.30    1.54
   4  -6  -1   31.70    1.49
   4   6   1   31.76    1.40
  -4   6  -1   33.15    1.64
   4   6   1   31.93    1.31
   4   6  -2    4.08    0.58
   4   6  -2    4.08    0.39
   4  -6   2    4.07    0.62
  -4   6   2    4.06    0.57
   4   6   2    3.72    0.37
   4   6   2    3.26    0.55
  -4   6  -2    4.31    0.61
   4  -6  -2    3.48    0.54
  -4   6   3   28.15    1.33
   4   6  -3   28.10    1.06
   4  -6   3   27.50    1.47
   4   6  -3   30.41    1.64
  -4   6  -3   28.01    1.51
   4   6   3   29.20    1.04
   4   6   3   28.32    1.43
   4  -6  -3   26.89    1.30
  -4   6   4    1.67    0.41
   4   6  -4    0.30    0.20
   4   6  -4    1.30    0.49
   4  -6   4    1.10    0.42
   4   6   4    0.94    0.42
   4  -6  -4    0.89    0.35
  -4   6  -4    1.16    0.43
   4   6   4    1.43    0.20
  -4   6   5    0.92    0.34
   4   6  -5    0.27    0.43
   4  -6   5    0.30    0.36
   4   6  -5    0.32    0.17
  -4  -6  -5    0.38    0.11
  -4   6  -5   -0.01    0.36
   4   6   5    0.10    0.37
   4  -6  -5    0.17    0.28
   4   6  -6    5.30    0.77
   4   6  -6    5.99    0.44
  -4   6   6    6.15    0.68
   4  -6   6    5.45    0.75
   4  -6  -6    6.22    0.56
  -4   6  -6    6.97    0.79
   4   6   6    5.46    0.74
  -4   6   7    1.15    0.39
   4  -6   7    1.04    0.41
   4   6  -7    0.38    0.46
   4   6  -7    0.27    0.24
   4  -6  -7    0.43    0.28
  -4   6  -7    0.44    0.35
   4   6   7    0.02    0.46
  -4   6   8    0.00    0.36
   4   6  -8    1.42    0.53
   4  -6   8    1.46    0.46
   4   6  -8    0.55    0.24
  -4   6  -8    0.65    0.39
   4   6   8    0.86    0.42
   4  -6  -8    1.04    0.32
   4   6  -9    1.05    0.59
   4   6  -9    0.68    0.27
  -4   6   9    0.84    0.46
   4  -6   9    1.01    0.51
  -4   6  -9    0.91    0.53
   4   6   9    1.02    0.55
   4  -6  -9    1.11    0.36
  -4   6  10   -0.05    0.41
   4   6 -10    0.46    0.25
   4  -6  10   -0.16    0.44
   4   6 -10    0.91    0.54
   4   6  10   -0.14    0.53
  -4   6 -10    0.52    0.46
  -4   6  11    1.54    0.53
   4   6 -11    0.79    0.72
   4   6 -11    0.66    0.34
   4  -6  11    2.84    0.61
   4  -6 -11    1.11    0.39
  -4   6 -11    1.03    0.65
   4   6  11    0.53    0.65
   4   6 -12    2.85    0.50
   4   6 -12    4.69    0.98
   4  -6  12    4.44    0.85
  -4   6  12    3.20    0.76
   4  -6 -12    3.31    0.51
  -4   6 -12    4.62    0.97
   4   6  12    4.92    0.90
   4   6 -13    1.39    0.66
   4  -6  13    0.24    0.58
  -4   6  13    0.42    0.51
  -4   6 -13    0.81    0.50
   4   6  13   -0.18    0.63
   4   6 -14    0.91    0.86
   4  -6  14    0.21    0.72
   4   6  14    1.28    0.75
  -4   6 -14    3.76    0.79
   4   6 -15    1.08    0.86
   4  -6  15    0.20    0.74
  -4   6 -15    2.46    0.82
   4   6 -16    0.44    0.88
  -4   6  16    1.12    0.60
   4  -6  16    1.66    0.76
  -4   6 -16    1.52    0.84
   4   6  16    0.69    0.66
   4   6 -17    1.75    0.96
  -4   6  17    1.50    0.78
  -4   6 -17    1.08    1.06
  -4   6 -18   -0.41    0.76
   5  -6   0   14.16    1.01
  -5   6   0   14.30    1.08
   5   6   0   15.11    1.00
   5   6   0   13.71    0.78
   5  -6   1   18.13    1.18
  -5   6   1   17.46    1.16
   5   6  -1   18.28    1.11
   5   6  -1   18.29    0.91
  -5   6  -1   18.82    1.21
   5  -6  -1   17.17    1.13
   5   6   1   16.44    0.94
   5   6   1   18.03    0.98
   5  -6   2    1.11    0.47
  -5   6   2    0.87    0.43
   5   6  -2    1.44    0.27
   5   6  -2    0.75    0.46
  -5   6  -2    0.68    0.47
   5  -6  -2    1.05    0.43
   5   6   2    1.23    0.30
   5   6   2    2.07    0.41
  -5   6   3   17.34    1.08
   5  -6   3   16.46    1.03
   5   6  -3   16.16    1.19
  -5   6  -3   16.64    1.06
   5   6   3   16.19    0.78
   5  -6  -3   16.11    1.04
   5   6   3   16.14    1.05
   5  -6   4   18.81    1.25
  -5   6   4   18.24    1.14
   5   6  -4   18.52    0.78
   5   6  -4   17.50    1.31
   5   6   4   16.34    1.13
   5   6   4   18.24    0.73
   5  -6  -4   17.71    1.11
  -5   6  -4   18.43    1.27
  -5   6   5   10.26    0.85
   5  -6   5   10.37    0.94
   5   6  -5    9.94    1.10
   5   6  -5   10.33    0.54
   5   6   5    9.81    0.43
   5   6   5    9.60    0.89
   5  -6  -5   11.18    0.84
  -5   6  -5   10.65    1.01
   5  -6   6    4.12    0.68
  -5   6   6    3.78    0.62
   5   6  -6    3.91    0.81
   5   6  -6    3.82    0.38
   5   6   6    4.33    0.64
   5  -6  -6    4.14    0.58
  -5   6  -6    3.93    0.72
  -5   6   7    5.10    0.67
   5  -6   7    4.66    0.74
   5   6  -7    5.19    0.92
   5   6  -7    4.40    0.38
  -5   6  -7    4.10    0.78
   5   6   7    4.80    0.82
   5  -6  -7    5.87    0.66
  -5   6   8    2.06    0.51
   5  -6   8    1.67    0.59
   5   6  -8    1.63    0.31
   5   6  -8    2.65    0.75
  -5   6  -8    0.84    0.62
   5  -6  -8    1.61    0.47
   5   6   8    1.51    0.54
  -5   6   9    4.23    0.59
   5  -6   9    2.85    0.76
   5   6  -9    3.18    0.35
   5   6  -9    4.83    0.96
  -5   6  -9    3.37    0.78
   5   6   9    2.88    0.64
   5  -6  -9    2.83    0.56
  -5   6  10    4.43    0.71
   5  -6  10    5.37    0.85
   5   6 -10    5.62    1.10
  -5   6 -10    3.70    0.95
   5   6  10    4.01    0.90
   5  -6 -10    4.06    0.62
  -5   6  11    6.62    0.84
   5  -6  11    5.95    1.02
   5   6 -11    6.21    1.02
  -5   6 -11    7.59    1.00
   5   6  11    7.91    0.94
   5  -6 -11    6.84    0.84
  -5   6  12    1.90    0.56
   5  -6  12    0.80    0.68
   5   6 -12    0.98    0.78
  -5   6 -12    1.14    0.77
   5  -6 -12    1.91    0.47
   5   6  12    1.76    0.72
  -5   6  13    0.90    0.50
   5  -6  13    0.87    0.60
   5   6 -13    0.09    0.68
  -5   6 -13    0.16    0.65
   5  -6 -13    0.60    0.40
   5   6 -14    0.60    0.74
   5  -6  15    1.16    0.78
   5   6 -15    1.90    0.92
  -5   6 -15    1.92    0.87
   5   6  15    1.15    0.82
  -5   6  16    1.05    0.54
   5  -6  16    0.57    0.64
   5   6 -16    0.22    0.78
  -5   6 -16   -0.51    0.74
   5   6  16   -0.02    0.73
   5  -6  17    1.60    0.79
  -5   6 -17    1.37    0.99
   5   6  17   -0.28    0.86
   6   6   0    3.56    0.56
   6   6   0    3.15    0.42
   6  -6   0    3.67    0.65
  -6   6   0    3.76    0.61
   6   6  -1    0.13    0.31
   6   6  -1    0.83    0.22
  -6   6   1    0.12    0.36
   6  -6   1    0.50    0.38
   6   6   1    0.20    0.26
   6   6   1    0.01    0.29
   6  -6  -1   -0.08    0.31
   6  -6  -1    0.09    0.31
  -6   6  -1    1.29    0.40
   6   6  -2    1.08    0.43
   6   6  -2    1.06    0.25
  -6   6   2    1.51    0.46
   6  -6   2    1.15    0.48
   6   6   2    1.65    0.33
   6   6   2    0.76    0.40
   6  -6  -2    0.98    0.46
  -6   6  -2    1.38    0.49
   6   6  -3    3.16    0.32
   6   6  -3    3.22    0.67
  -6   6   3    3.00    0.58
   6  -6   3    3.53    0.62
   6   6   3    3.42    0.36
   6   6   3    3.39    0.55
   6  -6  -3    3.35    0.61
  -6   6  -3    3.32    0.65
   6   6  -4    0.24    0.16
   6   6  -4    0.08    0.40
  -6   6   4    0.20    0.30
   6  -6   4    0.37    0.29
   6   6   4    0.17    0.16
   6   6   4   -0.15    0.32
   6  -6  -4    0.20    0.33
  -6   6  -4    0.00    0.39
   6   6  -5    0.86    0.55
   6   6  -5    0.83    0.20
  -6   6   5    1.16    0.41
   6  -6   5    1.34    0.49
   6   6   5    0.88    0.20
   6   6   5    1.13    0.47
   6  -6  -5    1.57    0.44
  -6   6  -5    0.82    0.53
   6   6  -6    1.68    0.61
   6   6  -6    1.42    0.25
  -6   6   6    1.13    0.45
   6  -6   6    1.35    0.54
   6   6   6    1.06    0.56
   6  -6  -6    1.20    0.47
  -6   6  -6    1.58    0.58
   6   6  -7    4.31    0.89
   6   6  -7    4.46    0.38
  -6   6   7    4.27    0.63
   6  -6   7    4.10    0.81
   6   6   7    4.21    0.78
   6  -6  -7    3.77    0.73
  -6   6  -7    5.16    0.83
   6   6  -8    1.01    0.72
  -6   6   8    0.89    0.54
   6  -6   8    1.58    0.62
   6   6   8    1.83    0.62
   6  -6  -8    1.66    0.52
  -6   6  -8    1.88    0.62
   6   6  -9   10.94    1.47
  -6   6   9   11.07    1.03
   6  -6   9    9.22    1.18
   6   6   9   11.02    1.22
   6  -6  -9   11.42    1.06
  -6   6  -9    8.29    1.23
   6   6 -10    1.25    0.84
  -6   6  10    0.71    0.52
   6  -6  10    2.15    0.65
   6   6  10    1.51    0.57
   6  -6 -10    1.71    0.50
  -6   6 -10    1.46    0.74
   6   6 -11    0.94    0.70
  -6   6  11    1.83    0.52
   6  -6  11    1.74    0.64
   6   6  11    1.04    0.73
   6  -6 -11    1.25    0.63
  -6   6 -11    1.12    0.63
   6   6 -12    0.66    0.82
  -6   6  12    0.96    0.45
   6  -6  12   -0.33    0.62
   6  -6 -12    1.32    0.50
  -6   6 -12    1.78    0.70
   6   6 -13    1.52    0.77
   6  -6  13    0.77    0.57
   6  -6 -13    0.19    0.55
  -6   6 -13    2.02    0.75
   6   6 -14    1.20    0.78
   6  -6  14   -0.10    0.58
   6   6  14    1.59    0.71
   6   6 -15    0.24    0.94
   6  -6  15   -0.22    0.77
   6   6  15    2.27    0.86
  -6   6 -15    3.57    0.88
   6   6 -16    0.30    0.86
   6  -6  16    0.47    0.71
  -6   6 -16    1.25    0.84
   6   6  17    3.09    1.10
  -6   6 -17    1.75    1.20
   7  -6   0   42.54    2.17
   7   6   0   40.81    1.57
  -7   6   0   46.37    2.23
   7   6   0   42.23    1.90
   7  -6   1    7.65    0.90
  -7   6   1    7.98    0.82
   7   6  -1    6.74    0.73
   7   6   1    6.10    0.70
   7   6   1    6.91    0.59
   7  -6  -1    6.84    0.86
  -7   6  -1    8.65    0.87
  -7   6   2    0.80    0.47
   7   6  -2    2.00    0.49
   7   6  -2    0.84    0.31
   7  -6   2    0.72    0.51
   7   6   2    1.33    0.39
   7  -6  -2    1.13    0.51
  -7   6  -2    1.08    0.43
   7   6   2    1.48    0.32
   7  -6   3    4.44    0.72
   7   6  -3    5.18    0.73
  -7   6   3    4.56    0.65
   7   6  -3    4.19    0.35
   7   6   3    3.61    0.41
   7   6   3    3.77    0.54
   7  -6  -3    3.87    0.70
  -7   6  -3    4.01    0.73
   7   6  -4    6.28    0.44
   7   6  -4    6.18    0.88
  -7   6   4    6.33    0.73
   7  -6   4    5.25    0.85
   7   6   4    7.06    0.80
   7  -6  -4    5.88    0.81
  -7   6  -4    6.56    0.90
   7   6   4    5.69    0.51
   7  -6   5    0.51    0.47
   7   6  -5    0.65    0.19
  -7   6   5    0.52    0.33
   7   6  -5    0.08    0.50
   7   6   5    0.31    0.19
   7   6   5   -0.22    0.47
   7  -6  -5    1.71    0.43
  -7   6  -5    0.96    0.41
   7   6  -6    8.23    1.10
   7  -6   6    7.82    0.96
  -7   6   6    7.05    0.79
   7   6   6    7.13    0.94
   7  -6  -6    8.10    0.92
  -7   6  -6    6.98    1.02
   7  -6   7    9.77    1.17
   7   6  -7    9.61    1.29
  -7   6   7    9.99    0.92
   7   6   7    9.27    1.13
   7  -6  -7    9.55    1.10
  -7   6  -7   10.06    1.19
  -7   6   8    1.37    0.53
   7   6  -8    2.06    0.82
   7  -6   8    2.57    0.70
   7   6   8    2.76    0.69
   7  -6  -8    1.26    0.68
  -7   6  -8    1.42    0.69
   7   6  -9    1.15    0.78
  -7   6   9    1.00    0.49
   7  -6   9    2.03    0.66
   7   6   9    1.77    0.70
   7  -6  -9    1.49    0.66
  -7   6  -9    1.12    0.73
  -7   6  10    1.48    0.54
   7   6 -10    1.57    0.68
   7  -6  10    1.91    0.67
   7  -6 -10    2.06    0.59
  -7   6 -10    1.56    0.75
   7   6  10    0.80    0.58
   7   6 -11    2.71    0.96
  -7   6  11    2.05    0.59
   7  -6  11    1.46    0.72
   7   6  11    1.14    0.78
   7  -6 -11    2.10    0.76
  -7   6 -11    2.99    0.87
   7   6 -12    0.09    0.83
  -7   6  12    0.90    0.50
   7  -6  12    0.30    0.64
   7   6  12    1.18    0.67
   7  -6 -12    1.04    0.61
  -7   6 -12    1.34    0.73
   7   6 -13    1.19    0.81
  -7   6  13    0.84    0.42
   7  -6  13    0.55    0.60
   7   6  13    0.71    0.65
   7  -6 -13   -0.07    0.49
   7   6 -14    0.14    0.75
   7  -6  14    3.21    0.77
   7   6 -15    0.17    0.83
   7  -6  15    0.41    0.62
  -7   6 -15    1.49    0.78
   7  -6  16    0.56    0.65
   7   6  16    0.00    0.75
   8  -6   0    0.11    0.38
   8   6   0   -0.01    0.32
   8   6   0    0.30    0.19
  -8   6   0   -0.18    0.34
   8  -6   1    2.76    0.64
   8   6  -1    2.04    0.59
   8   6  -1    2.51    0.36
  -8   6   1    2.78    0.51
   8   6   1    1.45    0.43
   8  -6  -1    1.89    0.63
  -8   6  -1    2.41    0.59
   8   6   1    2.20    0.50
  -8   6   2    1.56    0.54
   8   6  -2    2.61    0.59
   8   6  -2    2.13    0.35
   8  -6   2    1.56    0.60
   8   6   2    1.90    0.40
   8   6   2    2.54    0.40
   8  -6  -2    1.63    0.59
  -8   6  -2    1.68    0.59
   8  -6   3    3.08    0.72
   8   6  -3    2.97    0.35
   8   6  -3    2.34    0.68
  -8   6   3    3.22    0.59
   8   6   3    2.38    0.55
   8   6   3    2.76    0.40
   8  -6  -3    2.67    0.68
  -8   6  -3    2.56    0.73
  -8   6   4    4.67    0.69
   8  -6   4    4.71    0.68
   8   6  -4    4.57    0.84
   8   6   4    3.83    0.42
   8   6   4    5.07    0.74
   8  -6  -4    3.92    0.77
  -8   6  -4    4.28    0.83
   8   6  -5    0.49    0.54
  -8   6   5    0.55    0.34
   8  -6   5    0.23    0.39
   8   6   5    0.22    0.25
   8   6   5    0.65    0.47
   8  -6  -5    0.17    0.45
  -8   6  -5    1.47    0.50
  -8   6   6    1.40    0.49
   8   6  -6    1.15    0.72
   8  -6   6    1.98    0.62
   8   6   6    1.48    0.59
   8  -6  -6    1.26    0.60
  -8   6  -6    0.88    0.66
   8  -6   7    1.92    0.72
   8   6  -7    1.31    0.85
  -8   6   7    2.64    0.54
   8   6   7    2.42    0.69
   8  -6  -7    3.32    0.73
  -8   6  -7    2.28    0.63
  -8   6   8    1.14    0.45
   8   6  -8    1.06    0.73
   8  -6   8    1.02    0.62
   8   6   8    0.96    0.64
   8  -6  -8    0.98    0.63
  -8   6  -8    1.20    0.54
   8   6  -9    1.20    0.83
  -8   6   9    1.66    0.46
   8  -6   9    1.84    0.69
   8   6   9    1.45    0.73
   8  -6  -9    1.62    0.66
  -8   6  -9    2.37    0.79
  -8   6  10    0.62    0.46
   8   6 -10    0.73    0.77
   8  -6  10    0.86    0.62
   8   6  10    0.71    0.68
   8  -6 -10    2.73    0.70
  -8   6 -10    1.23    0.71
   8  -6  11   -0.32    0.57
   8   6 -11    0.42    0.69
  -8   6  11    0.16    0.41
   8   6  11    0.79    0.50
   8  -6 -11    1.53    0.63
  -8   6  12    0.93    0.40
   8  -6  12   -0.21    0.63
   8   6 -12    0.31    0.77
   8   6  12    1.03    0.72
   8  -6 -12    1.07    0.65
   8   6 -13   -0.24    0.71
   8  -6  13   -0.16    0.53
   8  -6 -13   -0.01    0.48
  -8   6 -13    1.26    0.62
   8   6 -14    0.87    0.89
   8  -6  14   -0.10    0.64
   8   6  14   -0.03    0.71
  -8   6 -14    1.41    0.74
   8  -6  15    0.30    0.54
   8   6 -15    0.48    0.82
   8   6  15    0.38    0.68
  -8   6 -15   -0.34    0.70
   8   6  16    2.16    1.06
  -8   6 -16    1.86    1.20
   9  -6   0    0.37    0.45
   9   6   0    0.00    0.24
   9   6   0    0.89    0.39
   9  -6   1    1.67    0.55
   9   6  -1    0.82    0.25
  -9   6   1    1.13    0.48
   9   6  -1    0.94    0.51
   9   6   1    0.52    0.45
   9   6   1    0.65    0.31
   9  -6  -1    1.19    0.57
  -9   6  -1    2.22    0.54
  -9   6   2    7.07    0.78
   9   6  -2    6.18    0.90
   9   6  -2    5.76    0.45
   9  -6   2    5.92    0.79
   9   6   2    5.56    0.61
   9  -6  -2    7.01    0.95
  -9   6  -2    6.98    0.94
   9   6   2    5.69    0.64
   9  -6   3    2.63    0.70
  -9   6   3    1.87    0.50
   9   6  -3    2.56    0.69
   9   6   3    1.91    0.42
   9   6   3    1.97    0.54
   9  -6  -3    2.50    0.70
  -9   6  -3    2.57    0.68
  -9   6   4    2.11    0.51
   9   6  -4    3.18    0.79
   9  -6   4    3.18    0.74
   9   6   4    2.15    0.41
   9   6   4    3.11    0.58
   9  -6  -4    3.22    0.71
  -9   6  -4    3.30    0.78
   9   6  -5    0.46    0.54
  -9   6   5    0.16    0.36
   9  -6   5   -0.29    0.49
   9   6   5    0.63    0.23
   9   6   5    0.35    0.43
   9  -6  -5    0.14    0.49
  -9   6  -5    0.09    0.50
  -9   6   6    1.09    0.48
   9   6  -6    1.31    0.71
   9  -6   6    1.85    0.65
   9  -6  -6    2.03    0.65
  -9   6  -6    1.16    0.65
   9   6   6    0.45    0.59
   9  -6   7    1.09    0.65
  -9   6   7    1.00    0.40
   9   6  -7    1.39    0.75
   9   6   7    0.83    0.59
   9  -6  -7    1.11    0.67
  -9   6  -7    1.64    0.65
   9   6  -8    2.07    0.79
  -9   6   8    1.00    0.42
   9  -6   8    1.15    0.67
   9   6   8    1.51    0.67
   9  -6  -8    1.07    0.70
  -9   6  -8    1.46    0.62
   9   6  -9    0.51    0.70
  -9   6   9    0.58    0.40
   9   6   9    0.10    0.61
   9  -6  -9    0.78    0.64
  -9   6  -9    1.72    0.66
   9   6 -10    0.27    0.70
  -9   6  10    0.62    0.35
   9  -6  10    0.26    0.49
   9   6  10    1.57    0.67
   9  -6 -10    0.43    0.66
  -9   6 -10    0.41    0.69
   9  -6  11    0.40    0.70
   9   6 -11    1.20    0.87
   9   6  11    0.93    0.80
   9  -6 -11    2.95    0.86
   9   6 -12    1.29    0.94
   9  -6  12    1.04    0.74
   9   6  12    1.64    0.90
   9  -6 -12    1.99    0.86
  -9   6 -12    1.68    0.82
   9   6 -13   -0.49    0.65
   9  -6  13    0.18    0.51
   9  -6 -13    0.70    0.55
  -9   6 -13   -0.20    0.49
   9  -6  14    0.27    0.78
   9   6  14    1.48    0.93
  -9   6 -14    1.70    0.89
   9   6 -15   -0.71    0.80
   9  -6  15    0.64    0.58
   9   6  15   -0.08    0.67
  -9   6 -15    0.10    0.57
  10   6   0    3.31    0.64
  10   6   0    2.26    0.38
 -10   6   0    2.74    0.66
  10  -6   0    3.08    0.76
  10   6  -1    0.10    0.53
  10   6  -1    0.68    0.24
  10  -6   1    1.22    0.58
 -10   6   1    0.96    0.48
  10   6   1    0.78    0.45
  10   6   1    0.85    0.34
  10  -6  -1    0.56    0.58
 -10   6  -1    1.29    0.49
  10   6  -2    0.51    0.50
 -10   6   2   -0.26    0.42
  10  -6   2    0.83    0.43
  10   6   2    0.20    0.37
  10   6   2    0.30    0.33
  10  -6  -2    0.38    0.52
 -10   6  -2    0.65    0.48
  10   6  -3    1.98    0.75
  10  -6   3    1.65    0.71
 -10   6   3    2.68    0.59
  10   6   3    2.26    0.46
  10   6   3    1.91    0.52
  10  -6  -3    2.28    0.73
 -10   6  -3    1.85    0.70
 -10   6   4    0.64    0.40
  10  -6   4   -0.03    0.52
  10   6  -4    0.03    0.57
  10   6   4   -0.21    0.47
  10  -6  -4    1.31    0.52
 -10   6  -4    1.20    0.51
  10   6   4    0.28    0.29
  10   6  -5   -0.41    0.60
  10  -6   5    0.44    0.56
 -10   6   5   -0.03    0.41
  10   6   5    0.80    0.28
  10   6   5    0.75    0.48
  10  -6  -5    0.87    0.56
 -10   6  -5    0.54    0.55
  10   6  -6    1.71    0.73
 -10   6   6    1.09    0.46
  10  -6   6    0.89    0.65
  10   6   6    1.19    0.59
  10  -6  -6    0.96    0.67
 -10   6  -6    0.70    0.64
  10   6  -7    0.57    0.62
 -10   6   7    0.79    0.41
  10  -6   7    1.03    0.65
  10   6   7    0.89    0.60
  10  -6  -7    1.57    0.69
 -10   6  -7    1.76    0.71
  10   6  -8    1.07    0.68
 -10   6   8    0.11    0.39
  10  -6   8    0.35    0.58
  10   6   8    0.24    0.57
  10  -6  -8    1.64    0.62
 -10   6  -8    0.11    0.52
  10   6  -9   -0.07    0.71
  10  -6   9    0.24    0.59
 -10   6   9    0.66    0.34
  10   6   9    0.42    0.61
  10  -6  -9    0.23    0.66
 -10   6  -9    1.00    0.67
  10   6 -10    0.23    0.70
  10  -6  10    0.33    0.58
  10   6  10    0.45    0.65
  10  -6 -10    0.03    0.67
 -10   6 -10    0.95    0.68
  10   6 -11    0.45    0.75
  10   6  11    0.75    0.73
  10  -6 -11    0.33    0.74
 -10   6 -11    0.84    0.74
  10   6 -12   -0.11    0.70
  10  -6  12    0.62    0.56
  10   6  12    0.09    0.65
  10  -6 -12   -0.10    0.69
 -10   6 -12    0.07    0.65
  10   6 -13   -0.30    0.96
  10  -6  13    1.42    0.78
  10   6  13    0.03    0.91
  10  -6 -13    2.28    0.91
 -10   6 -13    1.57    0.89
  10   6 -14    0.96    1.01
  10  -6  14    0.64    0.69
  10   6  14    1.25    0.95
  11   6   0   -0.06    0.42
 -11   6   0    1.10    0.43
  11   6   0   -0.15    0.22
  11  -6   0    0.79    0.49
  11   6  -1    1.14    0.57
  11  -6   1    1.75    0.63
 -11   6   1    1.14    0.55
  11   6   1    0.20    0.29
  11   6   1    0.89    0.43
  11  -6  -1    1.23    0.64
 -11   6  -1    0.71    0.57
  11   6  -2    0.86    0.62
 -11   6   2    1.30    0.48
  11  -6   2    1.37    0.65
  11   6   2    0.75    0.43
  11  -6  -2    0.93    0.64
 -11   6  -2    1.31    0.59
  11   6   2    0.81    0.37
  11   6  -3    0.51    0.58
  11  -6   3    0.17    0.58
 -11   6   3    1.65    0.45
  11   6   3    0.17    0.35
  11   6   3   -0.08    0.38
  11  -6  -3    0.69    0.46
 -11   6  -3    0.50    0.53
  11   6  -4    0.84    0.70
 -11   6   4    0.91    0.45
  11  -6   4    0.82    0.65
  11   6   4    1.22    0.42
  11  -6  -4    0.89    0.65
 -11   6  -4    2.58    0.66
  11   6   4    0.76    0.57
  11   6  -5    0.22    0.56
  11  -6   5    0.35    0.51
  11   6   5    0.86    0.42
  11   6   5   -0.05    0.26
  11  -6  -5    0.09    0.45
 -11   6   6    1.12    0.45
  11  -6   6    2.21    0.72
  11   6  -6    1.01    0.79
  11   6   6    1.28    0.65
  11  -6  -6    1.44    0.78
 -11   6  -6    1.23    0.75
  11   6  -7    1.35    0.74
  11  -6   7    0.50    0.67
  11  -6  -7    2.49    0.72
 -11   6  -7    0.36    0.73
  11   6   7    0.46    0.64
  11   6  -8    0.02    0.70
  11  -6   8    1.60    0.72
  11   6   8    1.35    0.71
  11  -6  -8    1.25    0.80
 -11   6  -8    2.36    0.80
  11   6  -9    1.22    0.72
  11  -6   9   -0.18    0.60
  11   6 -10    0.06    0.87
  11  -6  10    0.48    0.71
  11   6  10    1.19    0.81
 -11   6 -10    2.36    0.83
  11   6 -11   -0.54    0.73
  11  -6  11   -0.23    0.63
  11  -6 -11    1.50    0.80
 -11   6 -11    0.15    0.70
  11   6  11    0.95    0.71
  11   6 -12    1.91    0.98
  11  -6  12    0.12    0.81
  11   6  12    0.54    0.93
  11  -6 -12    1.69    0.91
 -11   6 -12    1.58    0.91
  11   6 -13    2.25    1.01
  11   6  13    0.52    0.94
  11  -6 -13    0.69    1.02
 -11   6 -13    0.29    0.93
 -12   6   0   -0.26    0.41
  12   6   0    0.13    0.42
  12  -6   1    0.08    0.49
  12   6  -1    0.06    0.55
 -12   6   1    1.10    0.43
  12   6   1    0.11    0.43
  12  -6  -1    0.56    0.56
 -12   6  -1    0.33    0.51
  12   6  -2    0.93    0.60
 -12   6   2   -0.28    0.55
  12  -6   2    1.16    0.52
  12   6   2    0.34    0.35
  12  -6  -2    1.83    0.53
 -12   6  -2    1.81    0.51
  12   6   2   -0.02    0.45
  12   6  -3    0.21    0.54
  12  -6   3   -0.22    0.44
  12   6   3    0.18    0.36
  12  -6  -3    0.87    0.53
 -12   6  -3    0.33    0.49
  12   6  -4    0.18    0.65
  12  -6   4    1.28    0.62
  12   6   4   -0.10    0.49
  12  -6  -4    0.60    0.62
 -12   6  -4    1.30    0.56
  12   6   4    0.08    0.39
  12   6  -5    0.85    0.80
  12  -6   5    0.37    0.72
 -12   6   5    1.17    0.45
  12  -6  -5    0.22    0.77
 -12   6  -5    2.08    0.75
  12   6   5    1.23    0.59
  12   6  -6    0.22    0.82
  12  -6   6    1.17    0.75
  12   6   6    1.35    0.55
 -12   6  -6   -0.05    0.75
  12  -6  -6    2.22    0.78
  12   6  -7    0.06    0.71
  12  -6   7   -0.20    0.62
  12  -6  -7    1.66    0.69
 -12   6  -7   -0.24    0.68
  12   6   7    0.75    0.58
  12   6  -8    0.03    0.67
  12   6   8    0.37    0.66
 -12   6  -8    1.60    0.77
  12  -6  -8    1.13    0.76
  12  -6   9    1.05    0.78
  12   6  -9   -0.10    0.93
  12   6   9    1.91    0.79
  12  -6  -9    1.23    0.89
 -12   6  -9    1.54    0.89
  12  -6  10    0.04    0.78
  12   6  10    1.15    0.87
  12  -6 -10    3.12    0.96
 -12   6 -10    0.30    0.86
  12  -6  11    0.68    0.77
  12   6 -11   -0.06    0.88
  12  -6 -11    1.55    0.98
 -12   6 -11    1.15    0.86
  12   6  11    0.60    0.88
  12   6 -12    1.47    0.85
  12  -6  12   -0.17    0.66
  12   6  12    1.81    0.88
 -12   6 -12   -0.30    0.69
 -13   6   0    0.93    0.63
  13   6   0    0.50    0.69
  13  -6   0    2.02    0.71
  13  -6   1    1.38    0.65
 -13   6   1    0.45    0.55
  13   6  -1    0.23    0.62
  13  -6  -1    1.10    0.65
 -13   6  -1    1.04    0.58
  13   6   1   -0.02    0.62
 -13   6   2    4.44    0.66
  13  -6   2    2.71    0.84
  13   6  -2    0.11    0.69
  13  -6  -2    3.27    0.84
 -13   6  -2    0.11    0.73
 -13   6   3    0.96    0.55
  13  -6   3    1.12    0.70
  13   6  -3    0.16    0.65
  13  -6  -3    0.97    0.59
 -13   6  -3    1.34    0.64
  13   6   3    0.10    0.52
  13  -6   4    0.98    0.62
  13   6  -4    0.33    0.65
 -13   6  -4    1.01    0.61
  13   6   4   -0.35    0.44
  13  -6   5    0.77    0.67
  13   6  -5    1.12    0.77
  13  -6  -5    0.08    0.75
 -13   6  -5    1.41    0.71
  13   6   5    0.05    0.51
  13  -6   6    0.25    0.72
  13   6  -6   -0.11    0.80
 -13   6  -6   -0.15    0.76
  13  -6  -6    1.69    0.79
  13   6   6    1.48    0.61
  13  -6   7    0.57    0.72
  13   6  -7    0.28    0.80
  13  -6  -7    1.20    0.78
 -13   6  -7   -0.25    0.73
  13   6   7    0.79    0.63
  13   6  -8    0.30    1.07
  13  -6   8    0.47    0.94
  13  -6  -8    2.30    1.04
 -13   6  -8    5.13    1.03
  13  -6   9    0.10    0.87
  13   6  -9    1.51    0.95
  13  -6  -9    0.47    0.95
 -13   6  -9    1.79    0.92
  13   6   9    1.43    0.84
  13  -6  10    1.58    0.76
  13   6 -10   -0.29    0.70
 -13   6 -10    0.43    0.80
  13   6  10   -0.11    0.76
  14  -6   0   -0.49    0.42
  14   6   0    0.04    0.43
 -14   6   0    0.32    0.35
  14  -6   1    1.67    0.55
  14   6  -1    0.00    0.61
 -14   6   1    1.11    0.57
  14   6   1   -0.17    0.61
  14  -6  -1    0.40    0.69
 -14   6  -1   -0.06    0.53
  14   6  -2    0.26    0.80
  14  -6   2    2.49    0.80
  14  -6  -2    1.07    0.82
  14   6   2    0.90    0.66
 -14   6  -2    1.34    0.66
  14  -6   3    0.68    0.67
  14   6  -3    0.16    0.66
  14  -6  -3   -0.46    0.69
 -14   6  -3    1.14    0.65
  14   6  -4   -0.25    0.67
  14  -6   4    0.32    0.66
  14  -6  -4    0.66    0.71
 -14   6  -4    0.49    0.66
  14  -6   5   -0.09    0.71
  14   6  -5   -0.41    0.80
  14  -6  -5    1.62    0.79
 -14   6  -5    0.87    0.75
  14   6  -6    0.02    0.93
 -14   6  -6    1.58    0.88
  14   6  -7   -0.26    1.01
  14  -6   7    1.56    0.89
  14   6   7    0.90    0.69
  14  -6  -7   -0.08    0.95
 -14   6  -7    3.97    0.94
  14   6  -8   -0.32    0.79
  14  -6   8    0.26    0.69
  14   6   8   -0.24    0.57
  14  -6  -8   -0.62    0.78
  14   6  -9    0.14    0.89
  14   6   9    0.13    0.75
 -14   6  -9    0.89    0.85
  15  -6   0    1.73    0.81
  15   6   0   -0.06    0.81
  15  -6   1    1.94    0.83
  15   6  -1    0.05    0.75
  15  -6  -1    1.50    0.85
  15   6   1    0.83    0.74
  15   6  -2    0.02    0.82
  15  -6   2    2.24    0.80
  15  -6  -2    1.31    0.81
 -15   6  -2   -0.39    0.76
  15  -6   3    1.11    0.84
  15   6  -3    0.11    0.83
 -15   6  -3    1.17    0.73
  15  -6  -3    1.80    0.88
  15   6  -4    0.45    0.94
  15  -6  -4    1.62    0.93
 -15   6  -4    1.21    0.88
  15   6  -5    0.08    1.10
 -15   6  -5    3.35    1.00
  15  -6  -5    1.70    1.07
  15  -6   6    1.61    0.93
  15   6  -6   -0.27    1.04
 -15   6  -6    1.53    0.82
   0   7   0    0.08    0.27
   0  -7   0    0.23    0.25
   0   7  -1    5.48    0.60
   0  -7   1    6.50    0.60
   0   7   1    5.95    0.64
   0  -7  -1    5.76    0.48
   0   7  -2   -0.02    0.19
   0  -7   2   -0.06    0.24
   0   7   2    0.04    0.23
   0  -7  -2   -0.13    0.18
   0   7  -3    2.46    0.47
   0  -7   3    2.85    0.48
   0   7   3    2.84    0.53
   0  -7  -3    2.63    0.30
   0  -7   4   -0.08    0.26
   0   7   4    0.04    0.27
   0  -7  -4    0.13    0.12
   0   7  -4   -0.22    0.25
   0   7  -5    1.01    0.38
   0   7   5    1.15    0.36
   0  -7  -5    0.96    0.20
   0   7  -6   -0.19    0.28
   0   7   6    0.01    0.26
   0  -7  -6    0.19    0.14
   0   7   7   30.29    1.75
   0  -7  -7   29.81    1.01
   0   7  -7   29.80    1.76
   0   7  -7   30.18    1.61
   0   7  -8   -0.11    0.31
   0   7  -8    0.17    0.30
   0   7  -9   10.50    0.99
   0   7  -9   10.74    1.10
   0   7   9    9.75    1.13
   0   7 -10    0.07    0.32
   0   7 -10    0.03    0.35
   0   7  10    0.05    0.39
   0   7 -11    7.13    1.01
   0   7 -11    6.70    0.89
   0   7  11    7.13    1.04
   0   7 -12   -0.16    0.44
   0   7 -12   -0.11    0.44
   0   7 -13    3.73    0.99
   0   7  13    7.11    1.10
   0   7 -14    0.84    0.64
   0   7  14    3.82    0.81
   0   7 -15    1.55    0.72
   0  -7  15    1.24    0.77
   0   7  15    1.06    0.78
   0   7 -16    1.91    0.75
   0  -7  16    0.93    0.81
   0   7  16    0.36    0.78
   0  -7  17    0.99    0.91
   0   7  17    1.89    0.93
   0  -7  18    1.52    0.88
   0   7  18    2.53    1.02
   1  -7   0    0.51    0.26
  -1   7   0    0.29    0.29
   1   7   0    0.04    0.29
  -1  -7   0    0.17    0.25
  -1   7   1    9.25    0.74
   1  -7   1    9.09    0.72
   1   7  -1    8.47    0.71
  -1  -7  -1    9.07    0.63
   1  -7  -1    9.08    0.65
  -1   7  -1    8.99    0.68
  -1  -7   1    9.49    0.71
   1   7   1    8.97    0.73
  -1   7   2    4.14    0.61
   1  -7   2    4.78    0.59
   1   7  -2    4.25    0.52
  -1  -7  -2    4.89    0.43
   1  -7  -2    4.04    0.46
  -1   7  -2    4.32    0.59
   1   7   2    4.23    0.58
  -1   7   3    2.34    0.46
   1  -7   3    2.04    0.48
   1   7  -3    1.87    0.40
   1   7  -3    2.62    0.43
  -1  -7  -3    1.00    0.23
   1  -7  -3    2.30    0.29
  -1   7  -3    2.07    0.39
   1   7   3    2.06    0.46
   1   7  -4    1.96    0.47
  -1   7   4    1.15    0.46
   1  -7   4    0.99    0.45
   1   7  -4    1.77    0.40
  -1  -7  -4    0.95    0.21
   1  -7  -4    1.42    0.23
  -1   7  -4    1.03    0.43
   1   7   4    1.74    0.45
  -1   7   5    0.13    0.31
   1  -7   5    0.72    0.38
   1   7  -5    1.03    0.40
   1   7  -5    0.28    0.32
  -1  -7  -5    0.37    0.16
   1  -7  -5    0.61    0.19
  -1   7  -5    0.39    0.36
   1   7   5    0.37    0.40
  -1   7   6    1.14    0.41
   1  -7   6    1.57    0.49
   1   7  -6    1.56    0.36
   1   7  -6    1.33    0.55
  -1  -7  -6    1.41    0.19
   1  -7  -6    1.36    0.28
  -1   7  -6    1.20    0.47
   1   7   6    2.03    0.52
  -1   7   7    0.65    0.39
   1  -7   7    0.09    0.37
   1   7  -7    0.50    0.43
   1   7  -7    0.15    0.29
   1  -7  -7    0.15    0.20
  -1   7  -7    0.36    0.36
   1   7   7    0.63    0.39
  -1   7   8   -0.23    0.47
   1  -7   8    0.57    0.39
   1   7  -8    0.41    0.51
   1   7  -8    1.14    0.39
   1  -7  -8    0.72    0.21
  -1   7  -8    0.09    0.43
   1   7   8    0.90    0.49
   1  -7   9    1.02    0.46
   1   7  -9    0.19    0.35
   1   7  -9   -0.05    0.49
  -1   7  -9    0.40    0.39
   1   7   9    0.03    0.48
   1  -7  10    0.12    0.53
   1   7 -10    0.20    0.58
   1   7 -10    0.59    0.41
   1   7  10    1.52    0.56
  -1   7  11    1.34    0.58
   1   7 -11    0.47    0.64
   1   7 -11    0.72    0.46
  -1   7 -11    0.61    0.50
   1   7  11    0.34    0.59
  -1   7  12    3.83    0.85
   1  -7  12    2.59    0.88
   1   7 -12    2.16    0.73
   1   7 -12    3.33    0.97
  -1   7 -12    2.53    0.80
   1   7  12    3.47    0.86
  -1   7  13    0.00    0.62
   1  -7  13    0.88    0.65
   1   7 -13    1.50    0.56
   1   7 -13   -0.11    0.71
  -1   7 -13    0.81    0.62
   1   7  13    0.40    0.64
  -1   7  14    2.28    0.72
   1   7 -14    1.04    0.55
   1   7 -14    0.12    0.78
  -1   7 -14    0.65    0.67
   1   7  14    0.96    0.72
  -1   7  15   -0.41    0.58
   1  -7  15    1.25    0.67
   1   7 -15    1.43    0.74
   1   7 -15    0.03    0.51
  -1   7 -15    0.57    0.57
  -1   7  16    0.73    0.74
   1  -7  16    1.56    0.78
   1   7 -16   -0.05    0.68
  -1   7 -16    1.00    0.74
  -1   7  17   -0.19    0.76
  -1   7 -17    1.81    0.94
   1   7  17    2.97    0.91
  -1   7  18    1.22    0.77
   1  -7  18   -0.18    0.78
  -1  -7  18    0.42    0.76
   1   7  18   -0.04    0.77
   2   7   0    2.86    0.51
   2   7   0    3.73    0.49
   2  -7   0    3.27    0.48
  -2   7   0    3.28    0.53
   2   7  -1   13.20    0.91
   2   7  -1   12.52    0.86
  -2  -7  -1   12.40    0.74
  -2   7   1   12.54    0.93
   2  -7   1   14.72    0.95
   2   7   1   14.23    0.95
   2  -7  -1   13.64    0.86
  -2   7  -1   13.13    0.98
   2   7  -2    2.40    0.43
   2   7  -2    2.34    0.51
  -2  -7  -2    2.57    0.31
  -2   7   2    2.53    0.51
   2  -7   2    2.68    0.51
   2   7   2    2.70    0.42
   2  -7  -2    2.40    0.42
  -2   7  -2    2.41    0.45
   2   7  -3   22.21    1.08
   2   7  -3   22.28    1.32
  -2  -7  -3   23.68    0.90
  -2   7   3   23.29    1.35
   2  -7   3   21.92    1.27
   2   7   3   21.24    1.26
   2  -7  -3   22.18    1.00
  -2   7  -3   22.46    1.34
   2   7  -4    6.96    0.64
   2   7  -4    7.07    0.79
  -2  -7  -4    6.89    0.42
  -2   7   4    6.68    0.73
   2  -7   4    5.94    0.76
   2   7   4    6.75    0.74
   2  -7  -4    6.61    0.55
  -2   7  -4    7.22    0.76
   2   7  -5    4.16    0.68
   2   7  -5    3.62    0.50
  -2  -7  -5    3.40    0.28
  -2   7   5    3.76    0.63
   2  -7   5    3.84    0.65
   2   7   5    3.62    0.56
   2  -7  -5    4.04    0.37
  -2   7  -5    3.23    0.58
   2   7  -6    0.84    0.38
   2   7  -6    1.25    0.57
  -2  -7  -6    1.38    0.15
  -2   7   6    1.30    0.50
   2  -7   6    2.05    0.50
   2   7   6    1.47    0.52
   2  -7  -6    0.65    0.24
  -2   7  -6    1.41    0.48
   2   7  -7    6.67    0.60
   2   7  -7    6.13    0.91
  -2   7   7    6.35    0.79
   2  -7   7    5.37    0.82
   2   7   7    5.87    0.70
   2  -7  -7    6.31    0.49
  -2   7  -7    6.37    0.80
   2   7  -8    1.42    0.46
   2   7  -8    1.57    0.64
  -2   7   8    1.64    0.55
   2  -7   8    1.30    0.59
   2   7   8    2.62    0.60
   2  -7  -8    1.47    0.30
  -2   7  -8    1.95    0.55
   2   7  -9    4.89    0.92
   2   7  -9    4.82    0.62
  -2   7   9    4.94    0.79
   2  -7   9    4.14    0.85
   2   7   9    5.43    0.85
   2  -7  -9    3.97    0.47
  -2   7  -9    4.23    0.78
   2   7 -10    1.48    0.57
   2   7 -10    1.03    0.42
  -2   7  10    1.89    0.61
   2  -7  10    1.79    0.66
   2   7  10    0.98    0.63
  -2   7 -10    1.33    0.58
   2   7 -11    3.67    0.99
   2   7 -11    4.92    0.69
  -2   7  11    4.94    0.87
   2  -7  11    4.31    0.96
   2   7  11    3.16    0.92
  -2   7 -11    4.88    0.84
   2   7 -12    0.67    0.40
   2   7 -12    0.20    0.66
  -2   7  12    0.17    0.48
   2   7  12   -0.28    0.59
  -2   7 -12    1.55    0.56
   2   7 -13    1.40    0.56
   2   7 -13    1.66    0.84
  -2   7  13    1.29    0.75
   2  -7  13    2.71    0.78
   2   7  13    1.07    0.78
  -2   7 -13    1.79    0.77
   2   7 -14    0.34    0.51
   2   7 -14   -0.11    0.70
  -2   7  14    0.46    0.61
   2  -7  14    0.22    0.63
   2   7  14    0.85    0.63
  -2   7 -14    0.74    0.56
   2   7 -15   -0.09    0.63
  -2   7  15    0.59    0.55
   2  -7  15    0.29    0.58
  -2   7 -15   -0.24    0.55
   2   7 -16   -0.12    0.82
   2  -7  16    0.13    0.77
  -2   7 -16    1.55    0.71
  -2   7  17   -0.12    0.58
   2  -7  17   -0.23    0.72
   2   7 -17    1.46    0.77
   2   7  17   -0.29    0.57
  -2   7 -17    1.18    0.68
   3   7   0    5.69    0.62
   3   7   0    6.20    0.57
   3  -7   0    7.03    0.68
  -3   7   0    5.65    0.72
   3   7  -1   24.89    1.29
   3   7  -1   26.23    1.35
  -3   7   1   24.54    1.29
   3  -7   1   24.64    1.27
   3   7   1   26.91    1.18
   3   7   1   26.22    1.36
   3  -7  -1   25.68    1.32
  -3   7  -1   25.85    1.46
   3   7  -2    6.61    0.62
   3   7  -2    6.63    0.70
  -3   7   2    6.41    0.73
   3  -7   2    6.84    0.72
   3   7   2    7.81    0.57
   3   7   2    6.55    0.69
   3  -7  -2    6.39    0.63
  -3   7  -2    6.71    0.78
   3   7  -3    1.23    0.45
   3   7  -3    0.79    0.33
  -3  -7  -3    0.88    0.21
  -3   7   3    0.65    0.42
   3  -7   3    1.91    0.44
   3   7   3    1.24    0.42
   3  -7  -3    0.59    0.35
  -3   7  -3    1.23    0.44
   3   7  -4    3.07    0.59
   3   7  -4    2.95    0.43
  -3  -7  -4    2.12    0.29
  -3   7   4    2.73    0.56
   3  -7   4    2.74    0.55
   3   7   4    2.30    0.47
   3  -7  -4    2.55    0.39
  -3   7  -4    2.75    0.56
   3   7  -5    1.59    0.56
   3   7  -5    1.74    0.33
  -3  -7  -5    1.47    0.19
  -3   7   5    1.85    0.48
   3  -7   5    1.79    0.50
   3   7   5    2.05    0.42
   3  -7  -5    1.71    0.37
  -3   7  -5    1.28    0.42
   3   7  -6    0.28    0.20
   3   7  -6    0.05    0.33
  -3   7   6    0.09    0.28
   3  -7   6   -0.02    0.24
   3   7   6   -0.31    0.30
   3  -7  -6   -0.05    0.17
  -3   7  -6   -0.07    0.28
   3   7  -7    1.14    0.51
   3   7  -7    0.55    0.32
  -3   7   7    0.83    0.46
   3  -7   7    0.52    0.45
   3   7   7    0.77    0.49
   3  -7  -7    0.43    0.28
  -3   7  -7    1.00    0.40
   3   7  -8    1.12    0.58
   3   7  -8    0.24    0.31
  -3   7   8    0.69    0.50
   3  -7   8    0.41    0.51
   3   7   8    0.68    0.52
   3  -7  -8    1.46    0.30
  -3   7  -8    1.05    0.51
   3   7  -9    1.90    0.65
   3   7  -9    1.26    0.37
  -3   7   9    0.86    0.55
   3  -7   9    1.53    0.62
   3   7   9    1.46    0.61
   3  -7  -9    1.33    0.33
  -3   7  -9    1.09    0.58
   3   7 -10    1.51    0.73
   3   7 -10    1.43    0.39
  -3   7  10    1.38    0.57
   3  -7  10    1.36    0.64
   3   7  10    0.83    0.67
   3  -7 -10    1.36    0.36
  -3   7 -10    2.19    0.61
   3   7 -11    2.15    0.51
   3   7 -11    1.42    0.81
  -3   7  11    1.65    0.58
   3  -7  11    2.19    0.78
   3   7  11    1.49    0.72
  -3   7 -11    1.63    0.67
   3   7 -12    0.09    0.35
   3   7 -12    0.07    0.60
   3  -7  12    0.42    0.56
   3   7  12    0.75    0.45
   3   7 -13    1.07    0.74
   3   7 -13    0.69    0.41
  -3   7  13    0.29    0.61
   3  -7  13    0.02    0.66
   3   7  13    0.66    0.66
  -3   7 -13    2.00    0.66
   3   7 -14   -0.02    0.67
  -3   7  14    0.09    0.57
   3  -7  14    1.01    0.56
   3   7 -15   -0.17    0.77
  -3   7  15    0.75    0.64
   3  -7  15   -0.07    0.71
  -3   7 -15    1.56    0.70
   3   7 -16   -0.07    0.91
  -3   7  16    0.59    0.71
   3  -7  16    1.05    0.76
   3   7  16    1.50    0.83
  -3   7 -16    1.60    0.82
   3   7 -17    0.30    0.83
  -3   7  17   -0.26    0.67
   3  -7  17    0.67    0.63
   3   7  17    1.10    0.73
  -3   7 -17    0.12    0.78
   4   7   0    4.76    0.60
   4   7   0    4.76    0.60
   4  -7   0    4.82    0.66
  -4   7   0    4.69    0.72
   4   7  -1   14.25    0.98
   4   7  -1   13.36    0.87
  -4   7   1   13.66    1.06
   4  -7   1   13.86    1.09
   4   7   1   13.44    0.94
   4   7   1   13.63    0.81
   4  -7  -1   13.58    1.00
  -4   7  -1   13.52    1.08
   4   7  -2    5.69    0.57
   4   7  -2    5.62    0.74
  -4   7   2    6.51    0.74
   4  -7   2    6.33    0.79
   4   7   2    6.92    0.52
   4   7   2    7.10    0.71
   4  -7  -2    6.46    0.67
  -4   7  -2    6.33    0.69
   4   7  -3   16.64    0.85
   4   7  -3   16.70    1.19
  -4   7   3   16.13    1.15
   4  -7   3   16.44    1.17
   4   7   3   16.93    0.78
   4   7   3   16.16    1.16
   4  -7  -3   16.66    0.98
  -4   7  -3   16.71    1.22
   4   7  -4    4.54    0.53
   4   7  -4    4.80    0.66
  -4   7   4    5.30    0.69
   4  -7   4    4.92    0.71
   4   7   4    6.06    0.72
   4  -7  -4    4.78    0.58
  -4   7  -4    5.42    0.64
   4   7  -5    2.69    0.68
   4   7  -5    3.16    0.38
  -4  -7  -5    2.95    0.26
  -4   7   5    3.58    0.62
   4  -7   5    2.43    0.62
   4   7   5    3.43    0.61
   4  -7  -5    3.01    0.44
  -4   7  -5    2.81    0.65
   4   7  -6    2.29    0.65
   4   7  -6    1.23    0.32
  -4   7   6    2.77    0.57
   4  -7   6    2.29    0.60
   4   7   6    1.87    0.51
   4  -7  -6    2.37    0.40
  -4   7  -6    3.38    0.62
   4   7  -7    8.14    1.03
  -4   7   7    7.39    0.85
   4  -7   7    7.83    0.91
   4   7   7    5.94    0.94
   4  -7  -7    8.49    0.68
  -4   7  -7    8.23    1.01
   4   7  -8    2.48    0.76
   4   7  -8    2.53    0.39
  -4   7   8    1.98    0.62
   4  -7   8    3.13    0.68
   4   7   8    2.97    0.68
   4  -7  -8    2.87    0.54
  -4   7  -8    1.66    0.68
   4   7  -9    3.22    0.45
   4   7  -9    3.15    0.88
  -4   7   9    3.16    0.77
   4  -7   9    3.08    0.78
   4   7   9    3.74    0.77
   4  -7  -9    3.86    0.52
  -4   7  -9    3.77    0.80
   4   7 -10    0.93    0.59
   4   7 -10    0.48    0.27
  -4   7  10    0.19    0.42
   4  -7  10    0.63    0.49
   4   7  10    0.02    0.52
   4  -7 -10   -0.07    0.29
  -4   7 -10    0.96    0.52
   4   7 -11    1.20    0.78
   4   7 -11    1.48    0.41
  -4   7  11    1.85    0.62
   4  -7  11    1.58    0.67
   4   7  11    1.27    0.77
   4  -7 -11    0.98    0.47
  -4   7 -11    1.91    0.75
   4   7 -12    0.15    0.54
  -4   7  12   -0.30    0.37
   4  -7  12    0.29    0.47
   4   7  12    0.01    0.52
  -4   7 -12    0.52    0.49
   4   7 -13    1.04    0.60
  -4   7  13   -0.16    0.42
   4  -7  13   -0.04    0.52
  -4   7 -13    0.39    0.59
   4   7 -14    0.66    0.87
  -4   7  14    0.93    0.68
   4  -7  14    1.72    0.77
   4   7  14    2.02    0.87
  -4   7 -14    1.58    0.81
   4   7 -15    1.21    0.85
  -4   7  15    0.17    0.65
   4  -7  15    1.96    0.64
  -4   7 -15   -0.47    0.77
  -4   7  16    0.06    0.86
   4  -7  16    4.21    0.95
   4   7  16    2.94    1.06
   4   7 -17    1.53    0.92
   4   7  17    0.81    0.91
  -4   7 -17   -0.18    0.89
   5  -7   0    9.76    0.96
  -5   7   0   11.89    0.92
   5   7   0   11.13    0.86
   5   7   0   11.14    0.79
  -5   7   1   15.17    1.15
   5  -7   1   15.16    1.14
   5   7  -1   13.31    0.96
   5  -7  -1   15.08    1.10
  -5   7  -1   14.91    1.18
   5   7   1   14.83    0.89
   5   7   1   14.20    0.97
  -5   7   2    1.96    0.53
   5  -7   2    1.56    0.45
   5   7  -2    1.51    0.51
   5   7  -2    1.45    0.36
   5  -7  -2    1.78    0.50
  -5   7  -2    1.93    0.57
   5   7   2    2.08    0.34
   5   7   2    1.56    0.42
  -5   7   3    1.43    0.48
   5  -7   3    1.69    0.52
   5   7  -3    1.53    0.33
   5   7  -3    0.94    0.51
   5  -7  -3    0.92    0.45
  -5   7  -3    2.24    0.52
   5   7   3    1.07    0.47
   5   7   3    1.43    0.28
  -5   7   4    3.75    0.66
   5  -7   4    3.41    0.69
   5   7  -4    3.76    0.70
   5  -7  -4    3.80    0.60
  -5   7  -4    4.02    0.59
   5   7   4    4.04    0.34
   5   7   4    4.42    0.67
  -5   7   5    1.46    0.52
   5  -7   5    1.53    0.56
   5   7  -5    1.89    0.30
   5   7  -5    1.82    0.59
   5  -7  -5    1.49    0.42
  -5   7  -5    1.13    0.48
   5   7   5    2.09    0.54
  -5   7   6    2.12    0.54
   5  -7   6    0.89    0.58
   5   7  -6    1.77    0.62
   5   7  -6    2.12    0.32
   5  -7  -6    1.41    0.48
  -5   7  -6    2.55    0.54
   5   7   6    1.48    0.49
  -5   7   7    0.81    0.44
   5  -7   7    1.30    0.46
   5   7  -7    0.30    0.53
   5   7  -7    0.41    0.23
   5  -7  -7    0.03    0.37
  -5   7  -7    0.18    0.51
   5   7   7    0.89    0.49
  -5   7   8    0.94    0.45
   5  -7   8    1.59    0.57
   5   7  -8    1.21    0.54
   5   7  -8    1.37    0.37
   5  -7  -8    0.68    0.51
  -5   7  -8    1.66    0.62
   5   7   8    1.71    0.62
  -5   7   9    2.11    0.64
   5  -7   9    2.32    0.73
   5   7  -9    2.00    0.42
   5   7  -9    2.53    0.82
   5  -7  -9    1.92    0.56
  -5   7  -9    2.12    0.76
   5   7   9    3.24    0.81
  -5   7  10    0.75    0.54
   5  -7  10    2.35    0.61
   5   7 -10    0.22    0.71
   5  -7 -10    0.97    0.42
  -5   7 -10    0.71    0.64
   5   7  10    0.17    0.69
  -5   7  11    1.88    0.50
   5  -7  11   -0.11    0.62
   5   7 -11    0.41    0.73
   5  -7 -11    0.94    0.42
  -5   7 -11    0.52    0.56
   5   7  11    1.08    0.58
  -5   7  12    1.08    0.56
   5  -7  12    0.61    0.60
   5   7 -12    0.05    0.73
   5  -7 -12    0.23    0.46
  -5   7 -12    1.25    0.67
   5   7  12    1.11    0.69
   5  -7  13    1.02    0.65
   5   7 -13    0.35    0.72
  -5   7 -13   -0.16    0.71
   5   7  13    1.05    0.71
   5  -7  14   -0.24    0.80
   5   7 -14    1.45    0.91
  -5   7 -14    0.85    0.83
   5   7  14    3.73    0.86
   5  -7  15    2.40    0.87
   5   7 -15    1.36    1.02
  -5   7 -15    2.27    0.97
   5  -7  16    0.40    0.66
  -5   7 -16   -0.13    0.81
   5   7  16    1.64    0.86
  -5   7 -17   -0.19    0.74
   6   7   0    0.81    0.40
   6   7   0    1.55    0.37
   6  -7   0    1.06    0.51
  -6   7   0    1.14    0.49
   6   7  -1    5.33    0.69
   6   7  -1    5.28    0.59
  -6   7   1    4.97    0.74
   6  -7   1    5.81    0.79
   6   7   1    4.55    0.65
   6   7   1    5.82    0.62
   6  -7  -1    5.31    0.77
  -6   7  -1    5.49    0.80
   6   7  -2   19.43    1.43
   6   7  -2   20.75    1.07
  -6   7   2   20.31    1.31
   6  -7   2   18.41    1.33
   6   7   2   17.27    0.97
   6   7   2   17.67    1.18
   6  -7  -2   19.41    1.30
  -6   7  -2   18.64    1.40
   6   7  -3   16.11    1.34
  -6   7   3   14.12    1.15
   6  -7   3   14.76    1.25
   6   7   3   14.39    0.80
   6   7   3   14.80    1.04
   6  -7  -3   15.40    1.14
  -6   7  -3   14.43    1.11
   6   7  -4    5.98    0.49
   6   7  -4    6.36    0.92
  -6   7   4    5.04    0.74
   6  -7   4    5.55    0.82
   6   7   4    5.40    0.48
   6   7   4    5.57    0.75
   6  -7  -4    5.36    0.75
  -6   7  -4    5.18    0.87
   6   7  -5    2.21    0.68
   6   7  -5    1.55    0.29
  -6   7   5    2.26    0.53
   6  -7   5    1.58    0.50
   6   7   5    1.54    0.27
   6   7   5    1.25    0.54
   6  -7  -5    2.63    0.52
  -6   7  -5    1.32    0.65
   6   7  -6    1.10    0.55
   6   7  -6    0.37    0.20
  -6   7   6    0.33    0.40
   6  -7   6   -0.09    0.46
   6   7   6    1.08    0.45
   6  -7  -6    0.35    0.40
  -6   7  -6    0.07    0.49
   6   7  -7    5.71    0.89
   6   7  -7    4.62    0.43
  -6   7   7    4.60    0.78
   6  -7   7    4.85    0.90
   6   7   7    5.07    0.86
   6  -7  -7    4.87    0.76
  -6   7  -7    5.76    0.92
   6   7  -8    0.52    0.79
  -6   7   8    1.62    0.48
   6  -7   8    1.26    0.66
   6   7   8    0.91    0.70
   6  -7  -8    1.54    0.55
  -6   7  -8    2.03    0.66
   6   7  -9    2.21    0.80
  -6   7   9    0.88    0.56
   6  -7   9    1.07    0.63
   6   7   9    0.27    0.72
   6  -7  -9    1.95    0.59
  -6   7  -9    0.28    0.65
   6   7 -10    2.43    0.81
  -6   7  10    1.93    0.66
   6  -7  10    1.81    0.73
   6   7  10    4.17    0.85
   6  -7 -10    1.73    0.61
  -6   7 -10    1.45    0.77
   6   7 -11    0.51    0.61
  -6   7  11   -0.09    0.40
   6  -7  11   -0.10    0.54
   6   7  11    1.18    0.62
  -6   7 -11    1.04    0.60
   6   7 -12    0.57    0.60
  -6   7  12    0.02    0.54
   6  -7  12    0.21    0.63
   6  -7 -12    1.77    0.54
  -6   7 -12    1.38    0.72
   6   7 -13    0.45    0.84
  -6   7  13    1.09    0.61
   6  -7  13    1.94    0.74
  -6   7 -13    1.43    0.83
   6   7 -14    0.31    0.86
  -6   7  14    0.93    0.59
   6  -7  14   -0.31    0.72
   6   7  14    1.89    0.82
  -6   7 -14    1.53    0.80
   6  -7  15    0.05    0.53
   6   7 -16    0.77    0.92
   6  -7  16   -0.41    0.76
  -6   7 -16    1.85    0.85
   7   7   0    1.46    0.50
   7   7   0    2.24    0.40
   7  -7   0    1.57    0.59
  -7   7   0    1.55    0.59
   7   7  -1   -0.11    0.26
   7   7  -1    0.23    0.21
  -7   7   1   -0.19    0.31
   7  -7   1    0.26    0.31
   7   7   1   -0.19    0.25
   7   7   1   -0.01    0.23
   7  -7  -1    0.00    0.30
  -7   7  -1    0.09    0.25
   7   7  -2    2.06    0.52
   7   7  -2    0.77    0.28
  -7   7   2    1.18    0.50
   7  -7   2    1.22    0.55
   7   7   2    1.23    0.36
   7   7   2    1.22    0.39
   7  -7  -2    0.89    0.54
  -7   7  -2    1.73    0.55
   7   7  -3    0.13    0.23
   7   7  -3    0.47    0.46
  -7   7   3    0.61    0.42
   7  -7   3    0.59    0.46
   7   7   3    0.67    0.28
   7   7   3    0.40    0.38
   7  -7  -3    0.73    0.44
  -7   7  -3    0.21    0.48
   7   7  -4    2.63    0.35
   7   7  -4    2.29    0.73
  -7   7   4    3.25    0.63
   7  -7   4    2.29    0.58
   7   7   4    2.82    0.35
   7   7   4    3.28    0.62
   7  -7  -4    2.75    0.64
  -7   7  -4    2.26    0.76
   7   7  -5    0.94    0.60
   7   7  -5    0.78    0.28
  -7   7   5    0.84    0.41
   7  -7   5    0.72    0.43
   7   7   5    0.79    0.26
   7   7   5    1.73    0.48
   7  -7  -5    1.62    0.50
  -7   7  -5    0.93    0.62
   7   7  -6    2.73    0.85
  -7   7   6    3.02    0.63
   7  -7   6    2.15    0.76
   7   7   6    3.47    0.71
   7  -7  -6    2.53    0.67
  -7   7  -6    3.59    0.79
   7   7  -7    2.12    0.69
  -7   7   7    1.93    0.50
   7  -7   7    1.63    0.68
   7   7   7    1.16    0.69
   7  -7  -7    1.29    0.53
  -7   7  -7    1.73    0.58
   7   7  -8    0.33    0.51
  -7   7   8   -0.01    0.42
   7  -7   8    0.67    0.51
   7   7   8    0.18    0.55
   7  -7  -8    1.04    0.47
  -7   7  -8   -0.29    0.54
   7   7  -9    1.02    0.68
  -7   7   9    1.35    0.46
   7  -7   9    0.95    0.67
   7   7   9    1.86    0.73
   7  -7  -9    1.64    0.61
  -7   7  -9    0.24    0.69
   7   7 -10   -0.14    0.65
  -7   7  10    1.13    0.43
   7  -7  10    0.90    0.62
   7   7  10   -0.19    0.66
   7  -7 -10    0.44    0.55
  -7   7 -10    2.05    0.69
   7   7 -11    0.50    0.82
  -7   7  11    0.72    0.48
   7   7  11   -0.13    0.71
   7  -7 -11    2.53    0.54
  -7   7 -11   -0.45    0.71
   7   7 -12    0.50    0.48
  -7   7  12   -0.29    0.34
   7  -7  12   -0.15    0.42
  -7   7 -12    0.20    0.47
   7   7 -13    0.03    0.75
  -7   7  13    0.22    0.55
   7  -7  13   -0.35    0.66
   7   7  13    1.87    0.73
  -7   7 -13    1.18    0.75
   7  -7  14   -0.33    0.75
   7   7  14    1.51    0.83
  -7   7 -14    0.96    0.65
   7   7 -15   -0.02    0.77
   7  -7  15   -0.47    0.69
   7   7  15    1.57    0.77
   7   7 -16    2.09    1.35
   7  -7  16    6.49    1.11
  -7   7 -16    1.39    1.22
   8  -7   0    0.40    0.42
   8   7   0   -0.04    0.23
  -8   7   0    1.08    0.39
   8   7   0    0.02    0.32
  -8   7   1    3.27    0.63
   8   7  -1    1.88    0.59
   8  -7   1    2.49    0.67
   8   7   1    1.89    0.53
   8   7   1    1.89    0.43
   8  -7  -1    1.79    0.64
  -8   7  -1    2.63    0.64
   8   7  -2    1.62    0.55
  -8   7   2    0.76    0.52
   8  -7   2    1.12    0.56
   8   7  -2    1.17    0.29
   8   7   2    1.08    0.41
   8   7   2    1.18    0.43
   8  -7  -2    0.80    0.57
  -8   7  -2    1.42    0.57
  -8   7   3    0.80    0.46
   8   7  -3    0.94    0.28
   8   7  -3    0.09    0.52
   8  -7   3    0.76    0.51
   8   7   3    0.38    0.29
   8   7   3    0.77    0.36
   8  -7  -3    0.33    0.51
  -8   7  -3    0.55    0.58
   8   7  -4    1.38    0.29
   8   7  -4    1.76    0.66
  -8   7   4    1.38    0.52
   8  -7   4    1.90    0.65
   8   7   4    1.90    0.42
   8   7   4    0.72    0.53
   8  -7  -4    1.51    0.63
  -8   7  -4    2.15    0.68
  -8   7   5    2.18    0.63
   8   7  -5    1.23    0.81
   8  -7   5    2.66    0.74
   8  -7  -5    2.62    0.70
  -8   7  -5    3.18    0.79
   8   7   5    3.07    0.63
   8  -7   6    1.97    0.58
   8   7  -6    1.58    0.78
  -8   7   6    2.09    0.60
   8   7   6    1.74    0.71
   8  -7  -6    2.51    0.66
  -8   7  -6    1.42    0.61
  -8   7   7    2.75    0.58
   8  -7   7    2.02    0.71
   8   7  -7    1.24    0.80
   8   7   7    1.55    0.74
   8  -7  -7    1.75    0.68
  -8   7  -7    1.33    0.75
   8  -7   8    1.76    0.70
   8   7  -8    1.33    0.82
  -8   7   8    1.39    0.49
   8   7   8    2.03    0.65
   8  -7  -8    2.25    0.63
  -8   7  -8    0.96    0.74
   8   7  -9   -0.23    0.72
   8  -7   9    0.41    0.61
   8   7   9    0.98    0.66
   8  -7  -9    0.86    0.60
  -8   7  -9    1.05    0.52
   8  -7  10    1.95    0.67
   8   7 -10   -0.35    0.83
  -8   7  10   -0.18    0.50
   8  -7 -10    1.39    0.71
  -8   7 -10    2.49    0.74
   8   7 -11    0.26    0.68
  -8   7  11    0.31    0.48
   8  -7  11    1.15    0.66
   8  -7 -11    1.43    0.62
   8   7 -12    1.08    0.88
  -8   7  12    0.77    0.48
   8  -7  12    3.06    0.71
   8   7  12    0.50    0.75
   8  -7 -12    0.05    0.67
  -8   7 -12   -0.17    0.81
   8   7 -13    0.32    1.00
   8  -7  13    0.20    0.75
   8   7  13    1.20    0.83
   8  -7 -13    1.63    0.79
  -8   7 -13    2.50    0.85
   8   7 -14    1.91    1.03
   8  -7  14    1.43    0.79
   8   7  14    1.85    0.95
  -8   7 -14    1.47    0.99
   8   7 -15   -0.47    0.69
   8  -7  15    0.35    0.59
  -8   7 -15    0.21    0.66
   9   7   0    0.64    0.38
   9  -7   0   -0.07    0.51
  -9   7   0   -0.14    0.47
   9   7   0    0.70    0.25
   9   7  -1    0.03    0.35
   9   7  -1    0.11    0.22
  -9   7   1    0.22    0.40
   9  -7   1    0.26    0.45
   9   7   1    0.10    0.35
   9   7   1    0.47    0.26
  -9   7  -1   -0.14    0.42
   9  -7  -1    0.22    0.45
   9   7  -2    0.34    0.42
  -9   7   2    1.27    0.43
   9  -7   2    0.09    0.50
   9   7  -2    0.35    0.22
   9   7   2    0.58    0.32
   9  -7  -2    0.64    0.50
  -9   7  -2    0.52    0.53
   9   7   2   -0.24    0.37
   9   7  -3    0.49    0.58
  -9   7   3    1.94    0.49
   9  -7   3    0.98    0.49
   9   7   3    0.35    0.33
   9   7   3    0.88    0.38
   9  -7  -3    0.43    0.56
  -9   7  -3    0.82    0.62
   9   7  -4    1.47    0.71
  -9   7   4    1.52    0.59
   9  -7   4    1.74    0.70
   9   7   4    1.61    0.38
   9  -7  -4    2.59    0.66
  -9   7  -4    2.21    0.72
   9   7   4    1.59    0.56
   9   7  -5   -0.08    0.65
  -9   7   5    0.78    0.49
   9  -7   5    1.12    0.59
   9   7   5    1.16    0.44
  -9   7  -5    0.16    0.63
   9  -7  -5    0.94    0.55
   9   7  -6    0.31    0.62
  -9   7   6   -0.08    0.43
   9  -7   6    0.22    0.53
   9   7   6   -0.26    0.53
   9  -7  -6    1.41    0.51
  -9   7  -6    1.00    0.55
   9   7  -7    0.52    0.63
  -9   7   7    0.08    0.41
   9  -7   7    0.23    0.47
   9  -7  -7    0.89    0.56
   9   7   7    1.18    0.58
  -9   7  -7    0.85    0.61
   9   7  -8    1.58    0.79
  -9   7   8    0.94    0.53
   9  -7   8    0.20    0.66
   9   7   8    2.55    0.74
   9  -7  -8    0.97    0.73
  -9   7  -8    2.21    0.73
   9   7  -9    2.43    0.81
  -9   7   9    0.81    0.51
   9  -7   9    1.02    0.68
   9   7   9    1.24    0.74
   9  -7  -9    0.80    0.69
  -9   7  -9    0.30    0.76
   9   7 -10    0.32    0.86
  -9   7  10    0.14    0.54
   9  -7  10    1.50    0.71
   9  -7 -10    5.50    0.85
  -9   7 -10    0.82    0.81
   9   7 -11   -0.47    0.65
  -9   7  11   -0.08    0.38
   9   7  11    0.40    0.55
   9  -7 -11   -0.42    0.58
   9   7 -12    1.40    1.09
   9  -7  12    1.55    0.84
   9   7  12    2.21    0.89
  -9   7 -12    1.96    0.95
   9   7 -13    0.58    1.10
   9   7  13    1.73    0.90
  -9   7 -13    1.65    0.94
   9  -7  14    1.62    0.73
   9   7  14   -0.32    0.76
  -9   7 -14   -0.12    0.66
  10   7   0    2.42    0.40
  10   7   0    2.74    0.69
 -10   7   0    3.25    0.77
  10  -7   0    4.43    0.84
  10   7  -1    1.33    0.57
  10   7  -1    0.77    0.28
 -10   7   1    1.46    0.56
  10  -7   1    1.90    0.64
  10   7   1    0.67    0.35
  10  -7  -1    1.60    0.62
 -10   7  -1    0.98    0.65
  10   7   1    0.23    0.43
 -10   7   2    1.39    0.49
  10  -7   2    0.11    0.42
  10   7  -2   -0.12    0.45
  10   7   2    0.47    0.41
  10   7   2    0.90    0.31
 -10   7  -2   -0.24    0.55
  10  -7  -2    0.10    0.54
  10   7  -3    0.53    0.61
 -10   7   3    1.09    0.46
  10  -7   3    0.62    0.61
  10  -7  -3    1.11    0.60
 -10   7  -3    1.31    0.63
  10   7   3    0.93    0.37
  10   7  -4   -0.02    0.57
 -10   7   4    0.90    0.43
  10  -7   4    0.46    0.46
  10   7   4    0.07    0.30
 -10   7  -4    0.51    0.54
  10  -7  -4    0.54    0.53
  10   7  -5    1.38    0.65
 -10   7   5    0.36    0.47
  10  -7   5    0.15    0.61
  10  -7  -5    1.71    0.62
 -10   7  -5    0.40    0.64
  10   7   5    0.74    0.52
 -10   7   6    1.58    0.51
  10  -7   6    0.76    0.72
  10   7  -6    2.50    0.83
  10   7   6    1.91    0.72
  10  -7  -6    1.53    0.75
 -10   7  -6    1.82    0.62
  10   7  -7    0.12    0.64
 -10   7   7    0.25    0.43
  10  -7   7   -0.04    0.57
  10   7   7   -0.16    0.58
  10  -7  -7    0.95    0.60
 -10   7  -7    1.06    0.57
  10   7  -8    1.48    0.90
 -10   7   8    1.51    0.56
  10  -7   8    1.11    0.78
  10   7   8    2.79    0.81
  10  -7  -8    1.49    0.81
 -10   7  -8    2.34    0.86
  10   7  -9    0.45    0.79
 -10   7   9    0.80    0.50
  10  -7   9    0.01    0.66
  10   7   9    1.29    0.70
  10   7 -10    0.04    0.82
  10  -7  10    0.49    0.68
  10  -7 -10    1.90    0.66
 -10   7 -10   -0.47    0.76
  10   7 -11    0.79    0.71
  10  -7  11   -0.13    0.57
  10  -7 -11   -0.29    0.66
 -10   7 -11    0.57    0.66
  10   7 -12   -0.50    0.91
  10  -7  12    0.41    0.77
  10   7  12    1.16    0.83
  10  -7 -12    1.62    0.97
 -10   7 -12    1.66    0.86
  10   7 -13    0.38    1.10
  10  -7  13    0.41    0.79
  10   7  13    3.06    0.94
 -10   7 -13    1.16    0.96
  11   7   0    0.98    0.33
  11  -7   0    0.93    0.54
  11   7   0    0.64    0.51
 -11   7   0    1.75    0.63
  11   7  -1    0.52    0.48
 -11   7   1    0.65    0.45
  11  -7   1    0.95    0.55
  11   7   1    0.64    0.42
  11   7   1   -0.16    0.30
  11  -7  -1    0.78    0.58
 -11   7  -1    0.85    0.50
  11   7  -2    0.25    0.57
 -11   7   2   -0.25    0.52
  11  -7   2    0.96    0.61
  11   7   2    0.95    0.39
 -11   7  -2    0.16    0.58
  11   7   2    0.88    0.46
  11  -7  -2    0.18    0.60
  11   7  -3   -0.25    0.57
 -11   7   3   -0.14    0.47
  11  -7   3    0.22    0.58
  11   7   3    0.65    0.36
  11   7   3    0.98    0.37
  11  -7  -3    0.74    0.58
 -11   7  -3   -0.01    0.55
  11   7  -4   -0.03    0.65
  11  -7   4    0.30    0.62
  11   7   4    0.85    0.48
 -11   7  -4    0.83    0.60
  11  -7  -4    0.93    0.63
  11   7  -5    0.60    0.72
 -11   7   5    1.35    0.46
  11  -7   5    1.45    0.66
  11   7   5   -0.20    0.55
  11  -7  -5    0.06    0.68
 -11   7  -5    1.09    0.67
  11   7  -6   -0.06    0.82
 -11   7   6    0.85    0.57
  11  -7   6    1.45    0.76
  11   7   6    3.56    0.71
  11  -7  -6    1.63    0.78
 -11   7  -6    1.24    0.75
  11   7  -7   -0.17    0.81
 -11   7   7    0.82    0.51
  11  -7   7    0.05    0.70
  11  -7  -7    1.65    0.76
 -11   7  -7    1.86    0.60
  11   7   7    1.07    0.71
  11   7  -8    0.08    0.79
  11  -7   8   -0.02    0.69
  11   7   8    1.17    0.61
  11  -7  -8    0.12    0.75
 -11   7  -8    2.01    0.75
  11  -7   9    0.00    0.78
  11   7  -9   -0.53    0.93
  11   7   9    2.79    0.83
  11  -7  -9    2.25    0.85
 -11   7  -9    1.87    0.85
  11   7 -10    0.24    0.67
  11  -7  10   -0.20    0.57
  11   7  10   -0.42    0.59
  11  -7 -10    0.40    0.53
 -11   7 -10    0.52    0.63
  11  -7  11    1.33    0.91
  11  -7 -11    1.49    1.14
 -11   7 -11    2.44    1.04
  11   7 -12    0.24    1.01
  11  -7  12    0.35    0.83
  11   7  12    0.19    0.86
  11  -7 -12    3.00    1.02
  12   7   0    0.18    0.46
  12  -7   0    0.06    0.52
 -12   7   1    1.24    0.51
  12   7  -1    0.09    0.58
  12  -7   1    0.44    0.51
  12  -7  -1    0.93    0.59
 -12   7  -1   -0.32    0.57
  12   7  -2   -0.25    0.71
  12  -7   2    1.29    0.58
  12   7   2    0.78    0.46
  12  -7  -2    4.49    0.70
 -12   7  -2    0.79    0.59
  12   7   2    0.01    0.49
  12   7  -3    0.69    0.77
 -12   7   3    1.80    0.62
  12  -7   3    0.85    0.75
  12   7   3    1.10    0.47
  12  -7  -3    2.47    0.74
 -12   7  -3    1.31    0.74
  12   7   3    0.86    0.57
  12   7  -4    1.77    0.77
  12  -7   4   -0.26    0.74
 -12   7   4    0.55    0.58
  12   7   4    1.00    0.54
  12  -7  -4   -0.41    0.71
 -12   7  -4    2.99    0.70
  12   7  -5   -0.14    0.80
  12  -7   5   -0.18    0.71
  12  -7  -5    2.95    0.74
  12   7  -6   -0.01    0.75
  12  -7   6    0.41    0.66
 -12   7  -6   -0.30    0.72
  12  -7  -6    0.79    0.72
  12   7   6    1.42    0.64
  12   7  -7   -0.45    0.74
  12  -7   7   -0.04    0.64
  12  -7  -7    0.32    0.70
 -12   7  -7    1.70    0.71
  12   7  -8   -0.31    0.97
  12  -7   8    1.76    0.84
  12   7   8    1.47    0.88
  12  -7  -8    2.33    0.90
 -12   7  -8    1.68    0.91
  12   7  -9   -0.47    0.70
  12  -7   9   -0.34    0.59
  12   7   9    1.37    0.63
  12  -7  -9   -0.16    0.65
  12  -7  10    1.35    0.82
  12   7  10    1.72    0.81
 -12   7 -10   -0.38    0.96
  12  -7 -10    0.82    0.93
  12  -7  11   -0.19    0.73
  12  -7 -11   -0.20    0.89
 -12   7 -11    1.49    0.80
  13  -7   0    2.97    0.79
  13   7   0    0.62    0.74
 -13   7   0    0.92    0.67
 -13   7   1    1.18    0.68
  13   7  -1    0.40    0.65
  13  -7  -1    2.06    0.74
 -13   7  -1    1.85    0.69
  13   7   1   -0.04    0.67
 -13   7   2    3.75    0.68
  13  -7   2    1.42    0.80
  13   7  -2    1.24    0.80
  13  -7  -2    1.13    0.79
 -13   7  -2   -0.04    0.74
  13   7   2    0.27    0.59
  13  -7   3    1.80    0.82
  13   7  -3    1.92    0.75
  13  -7  -3    1.22    0.77
 -13   7  -3    0.88    0.77
  13  -7   4    0.70    0.42
  13   7  -4   -0.07    0.54
  13  -7  -4   -0.33    0.53
 -13   7  -4   -0.45    0.49
  13   7  -5    0.71    0.53
 -13   7  -5   -0.25    0.51
  13   7   5   -0.21    0.34
  13  -7   6    0.82    0.85
  13   7  -6    1.35    0.95
  13  -7  -6    1.72    0.90
 -13   7  -6    1.21    0.89
  13  -7   7   -0.22    0.75
  13   7  -7    0.37    1.02
  13  -7  -7    4.44    0.96
  13   7   7    2.30    0.85
  13  -7   8    0.38    0.75
  13   7  -8   -0.29    0.85
  13  -7  -8    1.53    0.79
 -13   7  -8   -0.15    0.82
  13  -7   9    0.11    0.90
  13   7  -9    0.33    1.00
  13  -7  -9    2.43    0.96
 -13   7  -9    0.45    0.97
  13   7   9    1.77    0.91
  14  -7   0    2.20    0.64
  14   7   0   -0.01    0.80
  14   7  -1    1.78    0.94
  14  -7   1    1.88    0.88
 -14   7  -1    5.02    0.73
  14  -7  -1    0.68    0.90
  14   7   1    0.65    0.77
  14   7  -2   -0.01    0.66
  14  -7   2    0.75    0.72
 -14   7  -2    0.72    0.58
  14   7  -3   -0.37    0.72
  14  -7   3    0.80    0.67
  14   7  -4   -0.01    0.94
  14  -7   4    0.62    0.85
  14  -7  -4    2.15    0.88
 -14   7  -4    1.48    0.87
  14   7  -5   -0.05    1.00
  14  -7   5    1.44    0.90
 -14   7  -5    0.51    0.93
  14  -7  -5    3.22    0.96
  14   7  -6    1.55    1.01
  14  -7  -6    1.86    0.97
 -14   7  -6    0.17    0.94
  14   7  -7    0.77    1.00
  14  -7   7    1.57    0.91
 -14   7  -7    0.90    0.99
  15  -7   0    1.26    0.89
  15  -7   1    1.91    1.00
  15   7  -2   -0.56    0.98
  15  -7   2    2.23    0.90
  15  -7  -2    1.97    0.93
  15  -7   3    1.78    0.81
  15   7  -3   -0.61    0.89
 -15   7  -3    0.31    0.73
  15  -7  -3    1.28    0.87
  15  -7   4   -0.13    0.72
  15   7  -4    0.19    0.82
  15  -7  -4    1.37    0.80
 -15   7  -4   -0.20    0.75
   0   8   0    7.84    0.81
   0  -8   0    8.41    0.75
   0   8  -1   -0.11    0.31
   0  -8   1    0.54    0.30
   0   8   1    0.09    0.35
   0  -8  -1    0.06    0.26
   0   8  -2    6.43    0.74
   0  -8   2    6.72    0.75
   0   8   2    6.75    0.81
   0  -8  -2    7.02    0.61
   0   8  -3   -0.03    0.28
   0  -8   3    0.09    0.28
   0   8   3   -0.24    0.28
   0  -8  -3    0.13    0.17
   0  -8   4    6.71    0.81
   0   8  -4    7.10    0.78
   0   8   4    7.38    0.88
   0   8   5    0.54    0.28
   0  -8  -5   -0.01    0.15
   0   8  -5   -0.06    0.31
   0  -8   5   -0.08    0.33
   0   8   6    1.82    0.60
   0  -8  -6    1.56    0.25
   0   8  -6    1.77    0.53
   0  -8   6    1.33    0.56
   0  -8  -7    0.13    0.18
   0   8  -7    0.50    0.37
   0  -8   7   -0.21    0.41
   0   8   8   -0.16    0.41
   0  -8   8   -0.05    0.43
   0   8   9    0.79    0.45
   0   8  -9   -0.23    0.39
   0  -8   9    0.07    0.47
   0   8  10    0.01    0.61
   0   8 -10    1.12    0.50
   0  -8  10    0.88    0.62
   0   8  11    0.86    0.62
   0   8 -11    0.36    0.52
   0  -8  11    1.03    0.65
   0   8  12    0.51    0.66
   0   8 -12    1.48    0.55
   0  -8  12   -0.18    0.61
   0   8 -13    1.17    0.57
   0  -8  13   -0.35    0.67
   0   8  14    1.45    0.76
   0   8 -14    1.05    0.72
   0  -8  14    1.15    0.79
   0   8 -15    1.17    0.76
   0   8  16    4.68    1.05
   0   8 -16    1.66    0.97
   0  -8  16    2.09    1.04
   0   8  17    1.96    1.03
   0  -8  17    2.01    1.05
   1  -8   0    0.53    0.26
  -1   8   0    0.60    0.33
   1   8   0   -0.22    0.32
  -1  -8   0   -0.15    0.29
  -1   8   1    6.45    0.76
   1  -8   1    6.85    0.71
   1   8  -1    6.67    0.71
  -1  -8  -1    7.26    0.60
   1  -8  -1    6.65    0.60
  -1   8  -1    6.23    0.74
  -1  -8   1    5.78    0.69
   1   8   1    6.66    0.79
  -1   8   2    5.11    0.70
   1  -8   2    4.48    0.67
   1   8  -2    4.42    0.61
  -1  -8  -2    4.50    0.45
   1  -8  -2    4.44    0.49
  -1   8  -2    4.72    0.67
  -1  -8   2    4.09    0.60
   1   8   2    4.24    0.66
  -1   8   3   21.51    1.44
   1  -8   3   22.30    1.44
   1   8  -3   22.34    1.26
   1  -8  -3   22.67    1.11
  -1   8  -3   22.33    1.40
   1   8   3   23.01    1.47
  -1   8   4    0.66    0.41
   1  -8   4    0.88    0.40
   1   8  -4    0.12    0.36
   1   8  -4    0.41    0.25
  -1  -8  -4    0.45    0.20
   1  -8  -4    0.42    0.26
  -1   8  -4    0.15    0.38
   1   8   4    0.16    0.41
  -1   8   5    8.90    0.96
   1  -8   5    8.97    0.82
   1   8  -5    8.69    0.83
   1   8  -5    8.85    0.99
  -1  -8  -5    8.28    0.49
  -1   8  -5    9.01    0.92
   1   8   5    7.61    0.93
  -1   8   6    0.35    0.46
   1  -8   6    0.89    0.44
   1   8  -6    0.22    0.42
   1   8  -6    0.14    0.35
  -1  -8  -6    0.19    0.18
   1  -8  -6    0.75    0.21
  -1   8  -6    1.43    0.43
   1   8   6    0.18    0.37
  -1   8   7   10.62    1.06
   1  -8   7   10.62    1.07
   1   8  -7   10.88    1.22
   1   8  -7    9.43    0.92
   1  -8  -7    9.87    0.64
  -1   8  -7    9.94    1.02
   1   8   7    9.79    1.08
  -1   8   8    0.92    0.50
   1  -8   8    1.01    0.56
   1   8  -8    0.29    0.40
   1   8  -8    1.37    0.60
   1  -8  -8    0.39    0.24
  -1   8  -8    1.44    0.45
   1   8   8    0.27    0.54
  -1   8   9    6.69    1.02
   1  -8   9    8.10    1.07
   1   8  -9    7.03    0.88
   1   8  -9    7.05    1.16
  -1   8  -9    6.20    0.96
   1   8   9    8.35    1.05
  -1   8  10    0.70    0.63
   1  -8  10    0.49    0.66
   1   8 -10    1.90    0.52
   1   8 -10    0.73    0.70
  -1   8 -10    0.64    0.56
  -1   8  11    3.01    0.84
   1  -8  11    3.16    0.90
   1   8 -11    2.93    0.70
   1   8 -11    3.11    0.97
  -1   8 -11    2.69    0.76
   1   8  11    4.37    0.93
  -1   8  12    2.36    0.72
   1  -8  12    1.04    0.74
   1   8 -12    0.94    0.52
   1   8 -12    1.20    0.69
  -1   8 -12    1.11    0.63
   1   8  12    0.82    0.73
  -1   8  13    0.00    0.64
   1  -8  13    1.35    0.68
   1   8 -13    0.73    0.55
   1   8 -13    0.43    0.74
  -1   8 -13    0.65    0.60
   1   8  13   -0.34    0.66
  -1   8  14   -0.04    0.63
   1  -8  14   -0.32    0.67
   1   8 -14   -0.03    0.59
   1   8 -14    0.01    0.57
  -1   8 -14    0.41    0.64
   1   8  14    2.37    0.66
  -1   8  15    1.40    0.82
   1  -8  15    1.44    0.84
   1   8 -15    0.51    0.75
  -1   8 -15    1.41    0.68
  -1   8  16    1.26    0.91
   1  -8  16    0.99    0.96
  -1   8 -16    1.45    0.86
   1   8  16    3.03    0.95
  -1   8  17    0.21    0.88
   1  -8  17   -0.13    0.90
  -1  -8  17    1.46    0.91
   1   8  17    1.94    0.87
  -2  -8   0    0.07    0.24
   2  -8   0    0.10    0.29
  -2   8   0    0.25    0.33
   2   8   0    0.12    0.31
   2   8  -1    0.05    0.23
   2   8  -1   -0.12    0.26
  -2  -8  -1   -0.17    0.23
  -2   8   1    0.09    0.29
   2  -8   1    0.06    0.28
   2   8   1   -0.12    0.28
  -2   8  -1   -0.04    0.25
   2   8  -2    3.18    0.49
   2   8  -2    2.99    0.57
  -2  -8  -2    2.30    0.36
  -2   8   2    2.24    0.47
   2  -8   2    1.70    0.56
   2   8   2    2.20    0.48
   2  -8  -2    2.59    0.46
  -2   8  -2    1.70    0.57
   2   8  -3    6.34    0.70
  -2   8   3    6.68    0.84
   2  -8   3    6.27    0.79
   2   8  -3    7.67    0.83
  -2  -8  -3    5.50    0.45
   2   8   3    6.91    0.83
   2  -8  -3    7.22    0.59
  -2   8  -3    7.22    0.82
  -2  -8  -4    0.77    0.22
   2   8  -4    1.32    0.41
  -2   8   4    1.10    0.49
   2  -8   4    0.67    0.39
   2   8  -4    1.14    0.50
   2   8   4    0.89    0.49
   2  -8  -4    1.06    0.33
  -2   8  -4    0.94    0.47
   2   8  -5    2.66    0.55
  -2   8   5    2.40    0.61
   2  -8   5    3.72    0.70
  -2  -8  -5    2.70    0.32
   2   8  -5    3.58    0.71
   2  -8  -5    3.04    0.40
  -2   8  -5    2.99    0.64
   2   8   5    2.71    0.67
  -2  -8  -6    0.86    0.19
   2   8  -6    1.01    0.59
   2   8  -6    1.60    0.42
  -2   8   6    1.17    0.53
   2  -8   6    0.74    0.46
   2   8   6    0.80    0.54
  -2   8  -6    1.01    0.50
   2   8  -7    1.22    0.47
  -2   8   7    2.26    0.62
   2   8  -7    2.07    0.69
   2  -8   7    1.41    0.63
   2   8   7    1.91    0.63
   2  -8  -7    1.35    0.31
  -2   8  -7    1.93    0.59
  -2   8   8   -0.01    0.52
   2   8  -8    0.84    0.56
   2  -8   8    0.57    0.53
   2   8  -8    0.62    0.38
   2   8   8    0.74    0.45
   2  -8  -8    0.61    0.26
  -2   8  -8    0.22    0.52
   2   8  -9    0.03    0.38
  -2   8   9    1.64    0.56
   2  -8   9    1.61    0.61
   2   8  -9    1.17    0.65
   2  -8  -9    0.69    0.31
  -2   8  -9    0.65    0.54
   2   8   9    0.02    0.57
   2   8 -10    0.86    0.50
   2   8 -10    1.74    0.74
  -2   8  10    1.24    0.62
   2  -8  10    0.60    0.72
   2   8  10    0.75    0.64
  -2   8 -10    1.48    0.61
   2   8 -11    0.66    0.43
   2   8 -11    0.46    0.69
  -2   8  11    0.28    0.56
   2  -8  11    0.40    0.64
   2   8  11    1.32    0.60
  -2   8 -11   -0.06    0.55
   2   8 -12    0.20    0.70
   2   8 -12    0.36    0.50
  -2   8  12   -0.01    0.58
   2  -8  12    0.16    0.68
  -2   8 -12    1.43    0.55
   2   8 -13    1.61    0.55
   2   8 -13    0.06    0.68
  -2   8  13    2.35    0.74
   2  -8  13    1.44    0.79
   2   8  13    1.28    0.73
  -2   8 -13   -0.07    0.70
   2   8 -14    0.10    0.50
   2   8 -14    0.13    0.74
  -2   8  14    1.02    0.62
   2  -8  14    0.13    0.72
   2   8  14    0.93    0.69
   2   8 -15    1.47    0.89
  -2   8  15    1.20    0.74
   2  -8  15    0.22    0.85
  -2   8 -15    0.91    0.78
   2   8 -16    1.15    0.93
  -2   8  16   -0.23    0.79
   2  -8  16   -0.12    0.88
   2   8  16    1.89    0.86
  -2   8 -16    1.70    0.74
   2   8 -17    0.61    0.80
   2  -8  17   -0.07    0.80
   2   8  17    1.32    0.88
  -2   8 -17    1.31    0.87
   3   8   0    1.88    0.50
   3   8   0    1.84    0.46
   3  -8   0    2.11    0.49
  -3   8   0    1.51    0.44
   3   8  -1   19.13    1.21
   3   8  -1   16.72    1.12
  -3   8   1   17.22    1.14
   3  -8   1   17.58    1.20
   3   8   1   17.90    0.98
   3   8   1   18.22    1.18
   3  -8  -1   18.32    1.14
  -3   8  -1   18.25    1.30
   3   8  -2   12.91    0.93
   3   8  -2   13.49    0.99
  -3  -8  -2   13.31    0.78
  -3   8   2   12.35    0.97
   3  -8   2   13.27    1.06
   3   8   2   12.54    1.07
   3  -8  -2   13.54    0.94
  -3   8  -2   13.38    1.13
   3   8  -3    7.80    0.67
   3   8  -3    7.77    0.88
  -3  -8  -3    7.49    0.53
  -3   8   3    7.81    0.86
   3  -8   3    9.15    0.88
   3   8   3    7.68    0.85
   3  -8  -3    7.23    0.73
  -3   8  -3    7.32    0.90
   3   8  -4    0.09    0.33
   3   8  -4    1.11    0.45
  -3  -8  -4    0.42    0.21
  -3   8   4    0.10    0.45
   3  -8   4    0.77    0.42
   3   8   4    0.18    0.41
   3  -8  -4    0.69    0.28
  -3   8  -4    0.57    0.43
   3   8  -5    6.78    0.82
   3   8  -5    7.42    0.67
  -3  -8  -5    7.21    0.45
  -3   8   5    7.17    0.91
   3  -8   5    7.56    0.88
   3   8   5    7.22    0.76
   3  -8  -5    7.36    0.61
  -3   8  -5    6.93    0.79
   3   8  -6    1.74    0.69
   3   8  -6    2.37    0.46
  -3   8   6    1.93    0.58
   3  -8   6    1.25    0.60
   3   8   6    2.21    0.63
   3  -8  -6    1.42    0.37
  -3   8  -6    1.83    0.62
   3   8  -7    6.63    0.73
   3   8  -7    6.94    1.08
  -3   8   7    7.45    0.93
   3  -8   7    6.95    0.84
   3   8   7    7.32    1.00
   3  -8  -7    6.91    0.59
  -3   8  -7    8.46    1.00
   3   8  -8    1.49    0.64
   3   8  -8    0.81    0.35
  -3   8   8    0.25    0.56
   3  -8   8    0.62    0.46
   3   8   8    0.56    0.59
   3  -8  -8    1.06    0.31
  -3   8  -8    0.85    0.58
   3   8  -9    4.45    0.61
   3   8  -9    6.26    1.03
  -3   8   9    5.46    0.90
   3  -8   9    3.81    0.88
   3   8   9    3.94    0.94
   3  -8  -9    4.67    0.60
  -3   8  -9    3.87    0.89
   3   8 -10    0.93    0.39
   3   8 -10    1.05    0.71
  -3   8  10    1.16    0.61
   3  -8  10    1.11    0.57
   3   8  10    0.55    0.63
   3  -8 -10    0.81    0.34
  -3   8 -10    0.84    0.60
   3   8 -11    2.07    0.47
   3   8 -11    0.47    0.75
  -3   8  11    0.75    0.62
   3  -8  11    0.15    0.73
   3   8  11    1.04    0.67
  -3   8 -11    0.36    0.63
   3   8 -12    2.90    0.94
   3   8 -12    2.54    0.60
  -3   8  12    2.53    0.82
   3  -8  12    2.42    0.95
   3   8  12    1.88    0.91
  -3   8 -12    3.48    0.89
   3   8 -13    2.24    0.92
  -3   8  13    1.84    0.75
   3  -8  13    1.15    0.89
   3   8  13    1.66    0.86
  -3   8 -13    1.45    0.80
   3   8 -14    0.36    0.83
   3  -8  14    0.01    0.76
   3   8  14    2.08    0.73
  -3   8 -14    0.43    0.77
   3   8 -15    0.96    0.98
  -3   8  15    1.13    0.81
   3  -8  15    0.29    0.88
   3   8  15    5.09    0.88
  -3   8 -15   -0.47    0.88
   3   8 -16    1.10    0.86
  -3   8  16    0.74    0.72
   3  -8  16    0.37    0.78
  -3   8 -16   -0.28    0.79
   4   8   0    1.14    0.41
   4   8   0    1.16    0.42
   4  -8   0    0.65    0.46
  -4   8   0    0.80    0.48
   4   8  -1    5.63    0.68
   4   8  -1    4.78    0.70
  -4   8   1    5.56    0.78
   4  -8   1    4.78    0.77
   4   8   1    5.15    0.58
   4   8   1    5.56    0.73
   4  -8  -1    5.38    0.70
  -4   8  -1    5.44    0.80
   4   8  -2    0.98    0.43
   4   8  -2    1.34    0.52
  -4   8   2    1.20    0.44
   4  -8   2    2.13    0.53
   4   8   2    1.84    0.38
   4   8   2    1.93    0.49
   4  -8  -2    1.96    0.47
  -4   8  -2    0.99    0.46
   4   8  -3    0.27    0.28
   4   8  -3    0.51    0.42
  -4   8   3    0.27    0.41
   4  -8   3    0.69    0.33
   4   8   3    0.42    0.40
   4  -8  -3    0.16    0.34
  -4   8  -3    0.11    0.42
   4   8  -4    1.99    0.43
   4   8  -4    1.33    0.51
  -4  -8  -4    1.58    0.26
  -4   8   4    1.29    0.56
   4  -8   4    1.54    0.56
   4   8   4    2.11    0.56
   4  -8  -4    1.71    0.41
  -4   8  -4    2.44    0.59
   4   8  -5    0.43    0.36
   4   8  -5    0.56    0.54
  -4  -8  -5    0.49    0.21
  -4   8   5    1.31    0.47
   4  -8   5    1.22    0.50
   4   8   5    1.09    0.49
   4  -8  -5    0.44    0.36
  -4   8  -5    0.97    0.49
   4   8  -6    1.19    0.40
   4   8  -6    1.60    0.62
  -4   8   6    1.21    0.55
   4  -8   6    0.95    0.57
   4   8   6    0.02    0.57
   4  -8  -6    1.32    0.37
  -4   8  -6    1.44    0.57
   4   8  -7    0.44    0.54
   4   8  -7    0.72    0.28
  -4   8   7   -0.10    0.48
   4  -8   7   -0.11    0.39
   4   8   7   -0.30    0.50
   4  -8  -7    0.80    0.30
  -4   8  -7    0.50    0.51
   4   8  -8    0.96    0.68
   4   8  -8    1.12    0.35
  -4   8   8    1.46    0.58
   4  -8   8    1.04    0.51
   4   8   8    1.18    0.66
   4  -8  -8    1.68    0.39
  -4   8  -8    0.99    0.66
   4   8  -9    2.59    0.71
   4   8  -9   -0.08    0.33
  -4   8   9    1.30    0.60
   4  -8   9    0.89    0.63
   4   8   9    2.82    0.65
   4  -8  -9    0.66    0.44
  -4   8  -9    2.17    0.64
   4   8 -10    0.45    0.37
   4   8 -10    1.59    0.77
  -4   8  10    1.48    0.66
   4  -8  10    0.97    0.67
   4   8  10    2.21    0.70
   4  -8 -10    2.09    0.43
  -4   8 -10    1.06    0.70
   4   8 -11    0.22    0.34
   4   8 -11    1.42    0.72
  -4   8  11    0.17    0.60
   4  -8  11    2.23    0.66
   4   8  11    1.05    0.62
  -4   8 -11    0.28    0.60
   4   8 -12    1.53    0.77
  -4   8  12   -0.10    0.64
   4  -8  12    0.02    0.67
   4   8  12    1.47    0.68
  -4   8 -12    1.21    0.70
   4   8 -13    0.46    0.89
  -4   8  13    1.01    0.73
   4   8  13    3.44    0.76
  -4   8 -13    0.27    0.81
  -4   8  14    0.98    0.60
   4  -8  14   -0.15    0.67
   4   8  14   -0.48    0.66
  -4   8 -14    1.13    0.71
   4   8 -15   -0.42    0.73
  -4   8  15    0.76    0.61
   4  -8  15    0.25    0.67
   4   8 -16   -0.03    0.96
  -4   8  16   -0.30    0.76
   4  -8  16    2.52    0.87
   4   8  16    1.96    0.84
  -4   8 -16    0.25    0.91
   5  -8   0    0.54    0.45
  -5   8   0    0.72    0.49
   5   8   0    0.20    0.39
   5   8   0    1.11    0.37
  -5   8   1    9.59    1.03
   5  -8   1    8.34    0.98
   5   8  -1    9.33    0.91
   5   8  -1    9.47    0.84
   5  -8  -1    9.24    0.94
  -5   8  -1    9.34    1.01
   5   8   1    9.06    0.75
   5   8   1    9.12    0.87
  -5   8   2    4.03    0.72
   5  -8   2    3.90    0.72
   5   8  -2    3.35    0.67
   5   8  -2    3.62    0.53
   5  -8  -2    3.79    0.65
  -5   8  -2    3.82    0.74
   5   8   2    3.49    0.46
   5   8   2    3.37    0.61
  -5   8   3    2.59    0.57
   5  -8   3    1.41    0.51
   5   8  -3    2.11    0.38
   5   8  -3    2.11    0.62
   5  -8  -3    2.14    0.55
  -5   8  -3    1.84    0.63
   5   8   3    1.91    0.34
   5   8   3    2.31    0.56
  -5   8   4    0.88    0.48
   5  -8   4    0.93    0.51
   5   8  -4    0.89    0.31
   5   8  -4    0.69    0.52
   5  -8  -4    1.23    0.42
  -5   8  -4    0.63    0.42
   5   8   4    0.32    0.47
  -5   8   5    1.38    0.58
   5  -8   5    2.01    0.51
   5   8  -5    1.54    0.67
   5   8  -5    1.90    0.38
   5  -8  -5    1.65    0.52
  -5   8  -5    1.77    0.52
   5   8   5    1.74    0.62
  -5   8   6    1.85    0.60
   5  -8   6    2.20    0.67
   5   8  -6    2.36    0.73
   5  -8  -6    1.71    0.53
  -5   8  -6    2.59    0.73
   5   8   6    1.83    0.67
  -5   8   7    0.30    0.48
   5  -8   7    0.78    0.50
   5   8  -7   -0.05    0.55
   5   8  -7    0.79    0.26
   5  -8  -7   -0.06    0.34
  -5   8  -7   -0.02    0.55
   5   8   7    0.48    0.52
  -5   8   8    2.06    0.69
   5  -8   8    2.20    0.72
   5   8  -8    2.56    0.84
   5   8  -8    2.16    0.41
   5  -8  -8    1.45    0.50
  -5   8  -8    3.70    0.79
   5   8   8    2.52    0.75
  -5   8   9    1.69    0.69
   5  -8   9    1.79    0.72
   5   8  -9    1.55    0.40
   5   8  -9    1.23    0.81
   5  -8  -9    1.93    0.53
  -5   8  -9    1.40    0.76
   5   8   9    1.92    0.71
  -5   8  10    0.13    0.52
   5  -8  10    0.38    0.56
   5  -8 -10   -0.08    0.45
  -5   8 -10    1.65    0.60
   5   8  10    1.17    0.60
  -5   8  11    1.38    0.56
   5  -8  11    1.15    0.63
   5   8 -11   -0.34    0.72
   5  -8 -11    0.32    0.40
  -5   8 -11    1.02    0.63
  -5   8  12    0.86    0.68
   5  -8  12    1.22    0.81
   5   8 -12    0.57    0.91
  -5   8 -12    3.09    0.82
   5   8  12    2.34    0.80
  -5   8  13   -0.15    0.66
   5  -8  13    3.43    0.74
   5   8 -13    0.37    0.82
  -5   8 -13   -0.46    0.74
   5   8  13    1.11    0.60
  -5   8  14    0.31    0.79
   5   8 -14    1.17    0.96
  -5   8 -14    2.49    0.92
   5   8  14    2.92    0.85
  -5   8  15    0.14    0.85
   5  -8  15    2.86    0.93
  -5   8 -15    2.10    0.97
   5   8  15    1.70    0.93
   5  -8  16    1.59    0.95
   5   8 -16    0.76    0.88
  -5   8 -16    1.35    1.01
   5   8  16    1.93    0.79
   6   8   0    4.87    0.69
   6   8   0    5.10    0.60
   6  -8   0    5.35    0.79
  -6   8   0    4.91    0.80
   6   8  -1    1.44    0.51
   6   8  -1    1.77    0.43
  -6   8   1    1.58    0.57
   6  -8   1    1.62    0.48
   6   8   1    1.79    0.45
   6   8   1    1.32    0.46
   6  -8  -1    1.09    0.56
  -6   8  -1    1.31    0.47
   6   8  -2    0.08    0.42
   6   8  -2    0.40    0.30
  -6   8   2    0.21    0.44
   6  -8   2    0.43    0.44
   6   8   2    0.32    0.28
   6   8   2    0.60    0.38
   6  -8  -2    0.47    0.41
  -6   8  -2    0.53    0.45
   6   8  -3    0.66    0.31
   6   8  -3    0.87    0.47
  -6   8   3    1.37    0.47
   6  -8   3    0.21    0.48
   6   8   3    0.48    0.28
   6   8   3    0.66    0.42
   6  -8  -3    0.12    0.45
  -6   8  -3    0.75    0.51
   6   8  -4    2.42    0.69
  -6   8   4    1.84    0.63
   6  -8   4    2.47    0.66
   6   8   4    2.45    0.33
   6   8   4    2.61    0.62
   6  -8  -4    2.77    0.55
  -6   8  -4    2.30    0.74
   6   8  -5    2.84    0.76
   6   8  -5    2.68    0.42
  -6   8   5    3.07    0.67
   6  -8   5    3.23    0.74
   6   8   5    2.61    0.71
   6  -8  -5    3.19    0.63
  -6   8  -5    2.91    0.76
   6   8  -6    1.50    0.75
   6   8  -6    2.09    0.38
  -6   8   6    2.25    0.63
   6  -8   6    3.21    0.74
   6   8   6    4.19    0.71
   6  -8  -6    1.96    0.55
  -6   8  -6    2.20    0.65
   6   8  -7    0.26    0.62
   6   8  -7    0.78    0.32
  -6   8   7    0.86    0.49
   6  -8   7    0.69    0.55
   6   8   7    0.80    0.53
  -6   8  -7   -0.22    0.59
   6   8  -8    0.54    0.71
  -6   8   8    0.99    0.54
   6  -8   8    0.89    0.62
   6   8   8    1.68    0.64
   6  -8  -8    1.53    0.53
  -6   8  -8    0.31    0.66
   6   8  -9    0.38    0.61
  -6   8   9   -0.13    0.51
   6  -8   9    0.96    0.54
   6   8   9   -0.11    0.57
   6  -8  -9    0.98    0.43
  -6   8  -9    0.08    0.58
   6   8 -10    0.70    0.78
  -6   8  10    1.18    0.62
   6  -8  10    0.72    0.54
   6   8  10    1.19    0.70
   6  -8 -10    0.81    0.57
  -6   8 -10    2.96    0.67
   6   8 -11    0.37    0.73
  -6   8  11    0.32    0.59
   6   8  11    1.02    0.65
   6  -8 -11    0.75    0.50
  -6   8 -11    0.93    0.66
   6   8 -12    0.28    0.77
  -6   8  12    0.33    0.58
   6  -8  12    0.06    0.68
   6   8  12    1.85    0.58
   6   8 -13    1.66    0.79
  -6   8  13   -0.32    0.58
   6  -8  13    0.30    0.70
   6   8  13    1.83    0.70
  -6   8 -13    0.12    0.76
   6   8 -14    0.80    0.81
  -6   8  14    0.76    0.60
   6  -8  14    0.58    0.73
   6   8  14   -0.35    0.72
   6   8 -15    1.20    1.05
   6   8  15    1.56    0.94
  -6   8 -15    1.58    0.99
   7   8   0    4.79    0.69
   7   8   0    5.16    0.66
   7  -8   0    5.01    0.86
  -7   8   0    4.88    0.84
   7   8  -1    0.22    0.41
   7   8  -1    0.09    0.25
  -7   8   1    0.14    0.41
   7  -8   1    0.30    0.41
   7   8   1    0.16    0.30
   7   8   1    0.14    0.29
   7  -8  -1    0.21    0.41
  -7   8  -1    0.38    0.41
   7   8  -2    1.77    0.38
   7   8  -2    1.42    0.52
  -7   8   2    1.25    0.57
   7  -8   2    1.44    0.60
   7   8   2    1.30    0.37
   7   8   2    1.20    0.45
   7  -8  -2    0.99    0.58
  -7   8  -2    1.06    0.59
   7   8  -3    0.56    0.26
   7   8  -3    1.96    0.52
  -7   8   3    0.81    0.50
   7  -8   3    0.11    0.49
   7   8   3    0.15    0.29
   7   8   3    0.62    0.38
   7  -8  -3    0.26    0.49
  -7   8  -3    0.57    0.54
   7   8  -4    0.71    0.32
   7   8  -4    1.23    0.61
  -7   8   4    1.23    0.52
   7  -8   4    1.44    0.55
   7   8   4    0.59    0.27
   7   8   4    0.39    0.49
   7  -8  -4    1.12    0.51
  -7   8  -4    0.56    0.59
   7   8  -5    1.01    0.72
   7   8  -5    0.81    0.31
  -7   8   5    1.46    0.55
   7  -8   5    0.98    0.62
   7   8   5    1.40    0.57
   7  -8  -5    1.40    0.54
  -7   8  -5    1.82    0.56
   7   8  -6    2.08    0.84
  -7   8   6    1.44    0.60
   7  -8   6    1.41    0.68
   7   8   6    1.22    0.67
   7  -8  -6    1.84    0.59
  -7   8  -6    2.05    0.73
   7   8  -7    0.11    0.71
  -7   8   7    0.37    0.45
   7  -8   7    0.81    0.58
   7   8   7    0.70    0.57
   7  -8  -7    0.60    0.49
  -7   8  -7    1.77    0.63
   7   8  -8    0.44    0.59
  -7   8   8    0.17    0.46
   7  -8   8    0.31    0.53
   7   8   8    0.30    0.54
   7  -8  -8    0.75    0.47
  -7   8  -8    0.19    0.58
  -7   8   9    0.80    0.54
   7  -8   9    1.50    0.66
   7   8   9    1.14    0.53
   7  -8  -9   -0.33    0.58
  -7   8  -9    1.10    0.67
  -7   8  10    0.16    0.58
   7  -8  10    1.67    0.70
   7   8  10    0.84    0.70
   7  -8 -10    1.17    0.63
  -7   8 -10    1.99    0.71
   7   8 -11   -0.05    0.62
  -7   8  11    0.73    0.50
   7   8  11    1.31    0.71
   7  -8 -11    1.32    0.63
  -7   8 -11    0.75    0.70
   7   8 -12    0.09    0.50
  -7   8  12   -0.17    0.36
   7  -8  12    0.18    0.43
   7   8 -13    1.47    0.98
  -7   8  13    1.17    0.69
   7  -8  13    1.67    0.83
   7   8  13    2.04    0.93
  -7   8 -13    0.20    0.91
   7   8 -14    0.78    0.91
   7   8  14    0.03    0.90
  -7   8 -14    1.40    0.88
   7   8 -15    0.83    1.09
   7  -8  15    1.24    0.97
   7   8  15    2.43    1.04
   8   8   0    0.69    0.41
   8   8   0    0.25    0.30
   8  -8   0    0.87    0.50
  -8   8   0    0.24    0.50
   8   8  -1    0.16    0.30
  -8   8   1    0.52    0.46
   8   8   1    0.34    0.35
   8   8   1    0.20    0.32
   8  -8  -1    0.11    0.37
  -8   8  -1    0.78    0.46
   8   8  -2    0.79    0.31
   8   8  -2    1.29    0.57
  -8   8   2    0.82    0.54
   8  -8   2    1.27    0.49
   8   8   2    0.69    0.45
   8   8   2    0.79    0.43
   8  -8  -2    0.54    0.57
  -8   8  -2    1.11    0.58
   8   8  -3    0.35    0.25
   8   8  -3    0.32    0.50
  -8   8   3   -0.36    0.46
   8  -8   3    1.36    0.49
   8   8   3    0.21    0.27
   8   8   3    0.53    0.39
   8  -8  -3   -0.17    0.46
  -8   8  -3    0.18    0.50
   8   8  -4    1.75    0.36
   8   8  -4    2.48    0.75
  -8   8   4    1.91    0.63
   8  -8   4    2.59    0.68
   8   8   4    0.80    0.40
   8   8   4    0.86    0.58
   8  -8  -4    1.01    0.63
  -8   8  -4    2.30    0.74
   8   8  -5    1.26    0.73
  -8   8   5    0.81    0.51
   8  -8   5    1.88    0.64
   8   8   5    1.21    0.57
   8  -8  -5    0.78    0.60
  -8   8  -5    1.38    0.72
   8   8  -6    0.12    0.72
  -8   8   6   -0.07    0.53
   8  -8   6    0.55    0.60
   8   8   6    1.72    0.58
   8  -8  -6    1.26    0.54
  -8   8  -6    1.03    0.66
   8   8  -7   -0.08    0.73
  -8   8   7    0.64    0.44
   8  -8   7    0.89    0.58
  -8   8  -7    0.78    0.62
  -8   8   8    0.75    0.53
   8  -8   8    1.04    0.65
   8  -8  -8    1.08    0.59
  -8   8  -8    0.42    0.70
   8   8  -9   -0.28    0.90
  -8   8   9    1.18    0.59
   8  -8   9    0.06    0.73
   8  -8  -9    3.71    0.70
  -8   8  -9    1.76    0.76
   8   8 -10    0.12    0.79
  -8   8  10   -0.20    0.54
   8  -8  10   -0.16    0.66
   8   8  10    2.63    0.65
  -8   8 -10    0.93    0.68
   8   8 -11   -0.08    0.75
  -8   8  11    0.96    0.47
   8  -8  11   -0.36    0.68
   8   8  11    1.18    0.74
   8  -8 -11    0.36    0.68
   8   8 -12    0.02    0.79
  -8   8  12    1.48    0.56
   8  -8  12    0.56    0.73
   8  -8 -12    1.49    0.77
  -8   8 -12   -0.32    0.80
   8   8 -13   -0.48    0.84
  -8   8 -13    2.32    0.90
   8   8 -14   -0.03    0.85
   8  -8  14   -0.43    0.78
   8   8  14    1.41    0.68
   9   8   0    0.31    0.33
   9  -8   0    0.79    0.56
  -9   8   0    1.10    0.56
   9   8   0    1.29    0.49
   9   8  -1   -0.23    0.44
  -9   8   1    1.06    0.49
   9  -8   1   -0.28    0.50
   9   8   1    1.21    0.41
   9   8   1   -0.27    0.35
   9  -8  -1    0.71    0.53
  -9   8  -1    0.41    0.52
   9   8  -2    1.34    0.35
   9   8  -2    1.57    0.62
  -9   8   2    0.85    0.55
   9  -8   2    1.11    0.66
   9   8   2    0.73    0.47
   9   8   2    2.06    0.48
   9  -8  -2    1.73    0.67
  -9   8  -2    2.38    0.67
  -9   8   3    1.86    0.56
   9  -8   3    1.07    0.64
   9   8  -3    0.60    0.63
   9   8   3    0.90    0.48
   9   8   3    0.74    0.52
   9  -8  -3    1.67    0.63
  -9   8  -3    1.22    0.69
   9   8  -4    1.42    0.65
  -9   8   4    0.23    0.57
   9  -8   4    0.58    0.63
   9   8   4    0.87    0.32
   9   8   4    0.82    0.46
   9  -8  -4    0.85    0.61
  -9   8  -4    1.68    0.68
   9   8  -5    1.04    0.75
  -9   8   5    0.85    0.61
   9  -8   5    1.92    0.58
   9   8   5    1.48    0.61
   9  -8  -5    0.87    0.64
  -9   8  -5    1.30    0.77
   9   8  -6    1.10    0.77
  -9   8   6    1.05    0.61
   9  -8   6    1.00    0.72
   9   8   6    1.02    0.62
   9  -8  -6    2.17    0.66
  -9   8  -6    1.01    0.71
   9   8  -7    1.77    0.73
  -9   8   7    0.20    0.45
   9  -8   7   -0.10    0.60
   9  -8  -7    0.93    0.58
  -9   8  -7    0.47    0.51
   9   8  -8    1.82    0.78
  -9   8   8    0.79    0.52
   9  -8   8    0.53    0.51
   9  -8  -8   -0.28    0.62
   9   8  -9    1.32    0.91
  -9   8   9    1.29    0.58
   9  -8   9    0.59    0.59
   9  -8  -9    1.22    0.63
  -9   8  -9    1.74    0.73
   9   8 -10    1.05    0.91
  -9   8  10    0.65    0.48
   9  -8  10    1.72    0.70
   9   8  10    1.33    0.79
   9  -8 -10   -0.40    0.64
  -9   8 -10    1.08    0.77
   9  -8  11    1.38    0.87
   9   8  11    4.76    1.00
   9  -8 -11    1.18    0.80
  -9   8 -11    1.49    0.94
   9   8 -12   -0.29    0.94
   9  -8  12    1.46    0.82
  -9   8 -12    2.04    0.91
  10  -8   0    0.20    0.61
 -10   8   0    0.24    0.56
  10   8   0    0.20    0.33
  10   8   0    1.54    0.49
  10   8  -1    0.51    0.31
  10  -8   1    1.25    0.60
  10   8   1    0.87    0.44
  10  -8  -1    0.09    0.61
 -10   8  -1    0.90    0.61
  10   8  -2    0.90    0.50
 -10   8   2    1.48    0.56
  10  -8   2    0.10    0.60
  10   8   2    0.19    0.39
  10  -8  -2    0.20    0.61
 -10   8  -2    1.50    0.66
 -10   8   3    0.56    0.56
  10  -8   3    0.98    0.62
  10   8  -3    0.05    0.61
  10   8   3    0.79    0.37
  10   8   3    0.94    0.46
  10  -8  -3    0.45    0.62
 -10   8  -3    0.16    0.66
  10   8  -4    0.35    0.65
  10  -8   4    0.61    0.60
 -10   8  -4    1.38    0.66
  10  -8  -4    0.18    0.60
  10   8  -5    2.18    0.82
 -10   8   5    1.65    0.65
  10  -8   5    1.79    0.66
  10  -8  -5    1.77    0.73
 -10   8  -5    1.77    0.65
  10   8   5    0.74    0.60
  10   8  -6    0.12    0.72
 -10   8   6    0.00    0.54
  10  -8   6    0.38    0.66
  10   8   6    1.86    0.60
 -10   8  -6    0.86    0.66
  10  -8  -6    1.08    0.64
 -10   8   7    0.68    0.52
  10  -8   7    0.48    0.72
  10   8  -7    0.89    0.83
  10   8   7    1.05    0.67
  10  -8  -7    0.76    0.71
 -10   8  -7    2.81    0.75
  10   8  -8    1.81    0.76
 -10   8   8    0.40    0.48
  10  -8  -8   -0.15    0.67
 -10   8  -8    0.47    0.67
  10   8  -9    3.14    0.98
  10  -8   9    0.08    0.81
  10  -8  -9    1.89    0.82
 -10   8  -9    1.19    0.86
  10   8 -10    0.80    0.90
  10  -8  10    1.10    0.71
  10   8  10    0.43    0.77
  10  -8 -10    0.95    0.65
 -10   8 -10   -0.18    0.62
  10   8 -11   -0.28    1.15
  10  -8  11   -0.21    0.90
  10   8  11    4.96    1.02
  10  -8 -11    2.37    0.94
 -10   8 -11    1.95    1.03
  10   8 -12   -0.52    1.11
  10  -8  12    1.35    0.86
  10   8  12    2.58    1.03
 -10   8 -12    1.45    1.01
  11  -8   0    1.46    0.75
  11   8  -1    0.56    0.64
 -11   8   1    1.00    0.64
  11  -8   1    1.88    0.71
  11   8   1    0.32    0.50
  11   8   1    1.36    0.42
  11  -8  -1    1.83    0.69
 -11   8  -1    0.04    0.72
  11   8  -2    0.75    0.60
  11  -8   2    0.63    0.65
  11   8   2    0.17    0.43
  11  -8  -2   -0.26    0.64
  11   8   2    1.12    0.47
 -11   8  -2    0.82    0.62
 -11   8   3    0.67    0.54
  11  -8   3    0.03    0.67
  11   8   3    1.23    0.43
  11  -8  -3    0.79    0.55
 -11   8  -3    1.74    0.71
 -11   8   4    1.36    0.60
  11  -8   4    0.99    0.71
 -11   8  -4   -0.06    0.73
  11  -8  -4    2.42    0.71
  11   8   4    0.60    0.50
  11   8  -5    1.81    0.78
 -11   8   5    0.96    0.61
  11  -8   5    0.15    0.75
  11   8   5    1.15    0.59
  11   8  -6    2.14    0.98
 -11   8   6    1.97    0.70
  11  -8   6    2.14    0.88
  11   8   6    1.56    0.68
  11  -8  -6    1.91    0.85
 -11   8  -6    2.31    0.89
  11   8  -7    1.23    0.86
 -11   8   7    0.38    0.52
  11  -8   7    1.27    0.75
 -11   8  -7    1.85    0.78
  11   8  -8    0.99    0.88
  11  -8   8   -0.24    0.75
  11   8   8    1.68    0.64
  11  -8  -8    1.70    0.80
 -11   8  -8   -0.29    0.81
  11   8  -9   -0.61    0.97
  11  -8   9   -0.34    0.83
  11   8   9    3.58    0.81
  11  -8  -9    2.79    0.86
 -11   8  -9   -0.26    0.90
  11   8 -10   -0.14    0.94
  11  -8  10   -0.38    0.79
 -11   8 -10    1.78    0.88
  11  -8 -10    1.53    0.72
  11  -8  11    0.16    0.82
  11   8  11   -0.45    0.88
  11  -8 -11    1.43    0.88
 -11   8 -11    1.70    0.90
 -12   8   0    1.07    0.66
  12  -8   0   -0.04    0.66
  12   8  -1   -0.10    0.59
  12  -8   1   -0.19    0.64
 -12   8   1    1.36    0.63
  12  -8  -1    0.03    0.65
  12   8   1    0.79    0.47
  12   8  -2    0.37    0.71
  12   8   2    1.05    0.53
 -12   8  -2    0.90    0.71
  12   8  -3    0.39    0.77
 -12   8   3    1.47    0.68
  12   8   3    0.70    0.47
  12  -8  -3    2.85    0.75
 -12   8  -3    0.24    0.75
 -12   8   4    1.60    0.64
  12   8  -4   -0.47    0.78
  12  -8   4    0.52    0.64
  12  -8  -4    0.99    0.73
 -12   8  -4    1.34    0.75
  12   8  -5    1.66    0.86
  12  -8   5    1.73    0.76
  12  -8  -5    0.64    0.77
 -12   8  -5   -0.48    0.78
  12   8   5    1.33    0.56
  12   8  -6    1.24    0.87
  12  -8   6    0.00    0.75
  12  -8  -6    2.00    0.81
 -12   8  -6    0.57    0.81
  12   8  -7   -0.55    0.90
  12  -8   7    1.51    0.65
  12   8   7    1.78    0.69
  12  -8  -7    0.05    0.87
  12  -8   8    1.13    0.88
  12  -8  -8    0.22    0.95
 -12   8  -8    2.71    0.95
  12  -8   9   -0.43    0.71
  12  -8  -9   -0.25    0.68
  12   8 -10   -0.63    1.00
  12  -8  10    1.77    0.87
 -12   8 -10    0.74    0.95
  13   8   0    2.61    0.91
  13  -8   0    3.29    1.01
 -13   8   1    3.34    0.80
  13  -8   1    0.04    0.86
  13   8  -1    1.91    0.82
  13  -8  -1    1.34    0.83
 -13   8  -1    2.25    0.73
  13   8   1    0.05    0.66
  13  -8   2    1.91    0.74
  13   8  -2   -0.40    0.75
  13  -8  -2    1.51    0.72
 -13   8  -2   -0.21    0.60
  13  -8   3    0.74    0.64
  13   8  -3    0.22    0.66
  13  -8  -3   -0.30    0.66
  13  -8   4    1.23    0.80
  13   8  -4   -0.06    0.84
  13  -8  -4    1.15    0.79
  13  -8   5    1.34    0.87
  13   8  -5    0.19    0.95
  13  -8  -5    2.22    0.88
 -13   8  -5    0.70    0.86
  13  -8   6   -0.25    0.79
  13   8  -6    0.44    0.86
  13  -8  -6    1.97    0.81
 -13   8  -6   -0.04    0.82
  13  -8   7    0.07    0.74
  13   8  -7   -0.27    0.82
 -13   8  -7   -0.24    0.79
  13   8   7    1.29    0.65
  13  -8   8    0.10    0.76
  13   8  -8    1.66    0.90
 -13   8  -8    0.98    0.85
  13   8   8   -0.44    0.74
  14  -8   0    1.11    0.85
  14  -8   1    1.19    0.88
  14   8  -1    1.08    0.78
  14  -8  -1    1.32    0.90
 -14   8  -1    2.08    0.85
  14  -8   2    1.47    0.94
 -14   8  -2    1.39    0.85
  14  -8   3    1.94    0.91
  14   8  -3    0.59    0.97
  14   8  -4    2.25    0.96
  14  -8   4    1.02    0.93
  14  -8  -4    1.74    0.97
 -14   8  -4   -0.17    0.89
  14  -8   5   -0.16    0.74
  14   8  -5   -0.20    0.80
  14  -8  -5    1.43    0.77
 -14   8  -5   -0.06    0.73
   0   9   0   -0.22    0.39
   0  -9   0    0.58    0.32
   0   9  -1   42.07    2.20
   0  -9   1   45.71    2.23
   0   9   1   41.51    2.22
   0  -9  -1   42.17    2.01
   0   9  -2   -0.08    0.33
   0   9   2   -0.16    0.35
   0  -9  -2    0.05    0.22
   0   9  -3    7.07    0.89
   0  -9   3    6.38    0.91
   0   9   3    6.89    0.89
   0  -9  -3    7.48    0.64
   0  -9   4    0.03    0.30
   0   9   4   -0.04    0.30
   0   9  -5   24.75    1.64
   0  -9   5   22.64    1.70
   0   9   5   24.30    1.78
   0  -9  -5   24.03    1.10
   0   9  -6    0.49    0.39
   0  -9   6   -0.25    0.43
   0   9   6    0.37    0.45
   0  -9  -6    0.03    0.18
   0   9  -7    1.88    0.64
   0  -9   7    1.62    0.71
   0   9   7    2.36    0.72
   0  -9  -7    2.44    0.35
   0   9  -8    0.13    0.35
   0  -9   8   -0.31    0.38
   0   9   8   -0.14    0.44
   0   9  -9    6.41    1.01
   0  -9   9    6.10    1.12
   0   9   9    7.17    1.10
   0   9 -10    0.91    0.53
   0  -9  10    0.41    0.62
   0   9  10    0.02    0.61
   0   9 -11    3.93    0.85
   0  -9  11    3.93    1.02
   0   9  11    3.95    1.00
   0   9 -12    1.13    0.62
   0  -9  12    0.55    0.73
   0   9  12    0.99    0.71
   0   9 -13   -0.15    0.53
   0  -9  13    1.24    0.67
   0   9 -14   -0.34    0.55
   0  -9  14   -0.34    0.66
   0   9  14    1.71    0.65
   0   9 -15    0.99    0.74
   0  -9  15    1.81    0.94
   0   9  15    0.73    0.90
   0   9  16   -0.10    0.67
   1   9   0    0.72    0.45
  -1  -9   0    0.06    0.40
   1  -9   0    0.97    0.40
  -1   9   0    0.31    0.46
   1   9  -1    0.47    0.45
  -1  -9  -1    0.49    0.39
  -1   9   1    0.57    0.48
   1  -9   1    0.90    0.45
  -1  -9   1    0.41    0.44
   1   9   1    0.25    0.49
   1  -9  -1    0.58    0.39
  -1   9  -1    0.77    0.46
   1   9  -2   10.56    0.98
  -1  -9  -2    9.03    0.73
  -1   9   2   10.03    1.04
   1  -9   2   10.14    1.02
  -1  -9   2   10.20    0.99
   1   9   2   11.03    1.11
   1  -9  -2    9.66    0.90
  -1   9  -2    9.52    1.04
   1   9  -3    4.09    0.71
  -1  -9  -3    4.31    0.48
  -1   9   3    3.83    0.68
   1  -9   3    4.34    0.78
  -1  -9   3    4.34    0.75
   1   9   3    3.86    0.75
   1  -9  -3    3.76    0.56
  -1   9  -3    4.32    0.76
   1   9  -4    1.29    0.48
  -1  -9  -4    1.19    0.27
  -1   9   4    0.24    0.50
   1  -9   4    0.58    0.53
  -1  -9   4    1.20    0.49
   1   9   4    0.87    0.52
   1  -9  -4    0.10    0.29
  -1   9  -4    0.39    0.48
   1   9  -5    0.58    0.43
  -1  -9  -5    0.42    0.26
  -1   9   5    0.20    0.39
   1  -9   5    1.24    0.50
  -1  -9   5    0.30    0.48
   1   9   5    0.19    0.51
  -1   9  -5   -0.18    0.48
   1   9  -6    5.86    0.81
  -1  -9  -6    4.26    0.44
  -1   9   6    4.47    0.91
   1  -9   6    4.83    0.74
   1   9   6    4.69    0.89
   1  -9  -6    4.87    0.55
  -1   9  -6    5.20    0.83
   1   9  -7    0.46    0.46
  -1   9   7    1.00    0.53
   1  -9   7    1.56    0.50
   1   9   7    0.83    0.49
   1  -9  -7    0.90    0.34
  -1   9  -7    1.90    0.58
   1   9  -8    0.85    0.50
  -1   9   8    1.37    0.66
   1  -9   8    1.11    0.65
   1   9   8    1.01    0.55
  -1   9  -8    1.75    0.65
   1   9  -9    0.55    0.44
   1   9  -9    0.16    0.38
  -1   9   9    1.23    0.58
   1  -9   9   -0.08    0.52
   1   9   9    0.84    0.60
  -1   9  -9    1.05    0.56
   1   9 -10    0.39    0.36
   1   9 -10    0.03    0.39
  -1   9  10    0.33    0.53
   1  -9  10   -0.24    0.58
   1   9  10    0.33    0.55
  -1   9 -10    0.73    0.51
   1   9 -11    0.96    0.57
  -1   9  11   -0.04    0.66
   1  -9  11    1.50    0.74
   1   9  11    1.23    0.56
  -1   9 -11    0.84    0.56
   1   9 -12    0.24    0.45
  -1   9  12    1.08    0.61
   1  -9  12    1.04    0.65
   1   9  12    0.21    0.63
  -1   9 -12   -0.12    0.48
   1   9 -13    0.90    0.57
  -1   9  13    0.32    0.63
   1  -9  13   -0.31    0.68
   1   9  13    0.35    0.66
  -1   9 -13    0.42    0.64
   1   9 -14    1.64    0.76
  -1   9  14    0.03    0.84
   1  -9  14   -0.11    0.91
   1   9  14    2.83    0.88
  -1   9 -14    2.52    0.78
  -1   9  15   -0.31    0.67
   1  -9  15   -0.03    0.73
  -1  -9  15    0.02    0.72
  -1   9 -15    1.41    0.69
  -1   9  16   -0.14    0.86
   1  -9  16    0.15    0.91
   1   9  16   -0.50    0.89
  -1   9 -16    3.04    0.76
   2   9   0    4.08    0.72
  -2  -9   0    4.17    0.64
   2  -9   0    4.55    0.70
  -2   9   0    4.21    0.78
   2   9  -1   15.20    1.20
  -2  -9  -1   15.90    1.02
  -2   9   1   15.77    1.30
   2  -9   1   16.11    1.26
  -2  -9   1   15.29    1.07
   2   9   1   16.84    1.26
   2  -9  -1   15.87    1.20
  -2   9  -1   16.86    1.33
   2   9  -2    3.05    0.60
  -2  -9  -2    2.75    0.46
  -2   9   2    2.54    0.65
   2  -9   2    2.34    0.64
   2   9   2    2.14    0.66
   2  -9  -2    3.10    0.56
  -2   9  -2    2.99    0.69
   2   9  -3    1.68    0.54
   2   9  -3    1.22    0.49
  -2   9   3    2.40    0.61
   2  -9   3    1.50    0.59
   2   9   3    2.89    0.53
   2  -9  -3    1.39    0.45
  -2   9  -3    2.16    0.51
   2   9  -4    0.11    0.52
   2   9  -4    0.73    0.44
  -2  -9  -4    0.55    0.24
  -2   9   4    1.41    0.52
   2  -9   4    0.97    0.50
   2   9   4    0.66    0.51
   2  -9  -4    0.38    0.35
  -2   9  -4    0.06    0.48
   2   9  -5   10.81    1.19
   2   9  -5    9.90    0.91
  -2  -9  -5    9.58    0.59
  -2   9   5   11.20    1.18
   2  -9   5    9.53    0.95
   2   9   5   10.12    0.95
   2  -9  -5    9.84    0.80
  -2   9  -5   10.44    1.12
   2   9  -6    0.98    0.53
   2   9  -6    1.63    0.68
  -2   9   6    1.22    0.61
   2  -9   6    1.80    0.63
   2   9   6    0.71    0.61
  -2   9  -6    1.49    0.61
   2   9  -7    1.41    0.74
   2   9  -7    1.37    0.47
  -2   9   7    1.30    0.63
   2  -9   7    1.71    0.67
   2   9   7    1.80    0.67
   2  -9  -7    1.54    0.34
  -2   9  -7    1.25    0.66
   2   9  -8    1.20    0.49
   2   9  -8    1.30    0.70
  -2   9   8    0.91    0.63
   2  -9   8    1.98    0.62
   2   9   8    0.03    0.62
   2  -9  -8    0.54    0.34
  -2   9  -8    0.67    0.62
   2   9  -9    4.38    0.92
   2   9  -9    4.54    0.81
  -2   9   9    4.72    0.97
   2  -9   9    4.96    0.98
   2   9   9    4.23    0.82
  -2   9  -9    5.33    0.95
   2   9 -10    1.53    0.82
   2   9 -10    1.25    0.54
  -2   9  10    2.27    0.74
   2  -9  10    1.08    0.68
   2   9  10    1.90    0.81
  -2   9 -10    1.98    0.75
   2   9 -11    2.74    1.02
   2   9 -11    3.03    0.73
  -2   9  11    3.20    0.87
   2  -9  11    2.91    0.95
   2   9  11    2.53    0.93
  -2   9 -11    3.09    0.86
   2   9 -12   -0.05    0.63
   2   9 -12    0.02    0.53
  -2   9  12    0.36    0.66
   2  -9  12    1.23    0.72
  -2   9 -12    1.90    0.63
   2   9 -13    0.31    0.72
   2   9 -13    1.03    0.48
  -2   9  13    0.09    0.59
   2  -9  13   -0.26    0.69
   2   9  13   -0.38    0.66
  -2   9 -13    0.44    0.63
   2   9 -14    0.08    0.69
  -2   9  14   -0.01    0.58
   2   9  14    0.35    0.63
   2   9 -15    0.21    0.82
  -2   9  15    1.95    0.83
   2  -9  15    1.62    0.95
   2   9  15    1.38    0.92
  -2   9  16    0.19    0.63
   2  -9  16   -0.19    0.69
   2   9  16    0.37    0.66
  -2   9 -16    0.06    0.67
   3   9   0    3.52    0.72
   3  -9   0    3.49    0.70
  -3   9   0    4.15    0.76
   3   9  -1    0.38    0.48
   3   9  -1    1.69    0.47
  -3  -9  -1    0.62    0.35
  -3   9   1    0.94    0.43
   3  -9   1    0.59    0.50
   3   9   1    0.52    0.48
   3  -9  -1    1.42    0.46
  -3   9  -1    0.97    0.55
   3   9  -2    1.61    0.59
   3   9  -2    1.77    0.46
  -3  -9  -2    1.26    0.39
  -3   9   2    1.95    0.59
   3  -9   2    1.32    0.59
   3   9   2    2.33    0.48
   3  -9  -2    2.53    0.52
  -3   9  -2    1.46    0.62
   3   9  -3    0.31    0.38
   3   9  -3   -0.01    0.47
  -3  -9  -3    0.86    0.26
  -3   9   3    0.21    0.37
   3  -9   3    0.15    0.46
   3   9   3    0.61    0.46
   3  -9  -3    0.21    0.32
  -3   9  -3    0.30    0.46
   3   9  -4    1.65    0.60
   3   9  -4    1.17    0.48
  -3  -9  -4    1.65    0.34
  -3   9   4    0.59    0.57
   3  -9   4    1.05    0.57
   3   9   4    0.97    0.55
   3  -9  -4    0.91    0.38
  -3   9  -4    1.44    0.59
   3   9  -5    0.95    0.63
   3   9  -5    1.04    0.47
  -3  -9  -5    1.17    0.27
  -3   9   5    0.84    0.51
   3  -9   5    1.54    0.59
   3   9   5    1.17    0.56
   3  -9  -5    0.84    0.37
  -3   9  -5    1.19    0.58
   3   9  -6    0.23    0.54
   3   9  -6    0.50    0.40
  -3   9   6    0.20    0.50
   3  -9   6    0.86    0.50
   3   9   6    0.78    0.49
   3  -9  -6    0.14    0.29
  -3   9  -6    0.16    0.51
   3   9  -7    2.27    0.83
   3   9  -7    1.87    0.51
  -3   9   7    2.45    0.70
   3  -9   7    1.77    0.72
   3   9   7    1.82    0.61
   3  -9  -7    2.75    0.42
  -3   9  -7    1.92    0.62
   3   9  -8    0.63    0.37
   3   9  -8    0.52    0.63
  -3   9   8    0.30    0.54
   3  -9   8    0.43    0.55
   3   9   8    0.17    0.57
   3  -9  -8    0.25    0.30
  -3   9  -8    1.23    0.57
   3   9  -9    0.31    0.68
   3   9  -9    0.31    0.46
  -3   9   9    0.04    0.61
   3  -9   9    0.28    0.57
   3  -9  -9    0.45    0.32
   3  -9  -9    0.97    0.32
  -3   9  -9    0.69    0.59
   3   9 -10    0.14    0.72
   3   9 -10    0.75    0.42
  -3   9  10    0.92    0.62
   3  -9  10    1.03    0.66
   3   9  10   -0.31    0.64
  -3   9 -10    1.04    0.61
   3   9 -11    0.04    0.74
   3   9 -11    1.37    0.48
  -3   9  11   -0.16    0.63
   3  -9  11    1.71    0.69
   3   9  11   -0.12    0.67
  -3   9 -11    0.21    0.62
   3   9 -12   -0.17    0.88
   3   9 -12    1.51    0.57
  -3   9  12    0.76    0.75
   3  -9  12    2.01    0.66
   3   9  12    1.05    0.81
   3   9 -13    0.24    0.80
  -3   9  13    1.24    0.66
   3  -9  13   -0.39    0.72
   3   9  13    1.20    0.71
  -3   9 -13    0.37    0.71
   3   9 -14   -0.13    0.67
   3  -9  14   -0.11    0.61
   3   9  14   -0.32    0.62
  -3   9 -14    0.05    0.57
   3   9 -15   -0.41    0.91
  -3   9  15    1.12    0.76
   3  -9  15    0.03    0.86
   3   9  15    1.76    0.83
   3  -9  16   -0.04    0.85
  -3   9 -16    1.36    0.87
   4   9   0    3.00    0.62
   4   9   0    3.09    0.65
   4  -9   0    3.07    0.68
  -4   9   0    2.56    0.62
   4   9  -1    3.59    0.67
   4   9  -1    2.64    0.59
  -4   9   1    3.28    0.71
   4  -9   1    2.10    0.69
   4   9   1    3.08    0.51
   4   9   1    2.96    0.61
   4  -9  -1    2.39    0.63
  -4   9  -1    3.56    0.74
   4   9  -2    2.46    0.68
   4   9  -2    2.73    0.52
  -4   9   2    3.07    0.58
   4  -9   2    2.16    0.67
   4   9   2    3.45    0.66
   4  -9  -2    2.57    0.60
  -4   9  -2    2.50    0.73
   4   9  -3    0.90    0.42
   4   9  -3    1.00    0.53
  -4  -9  -3    0.98    0.30
  -4   9   3    1.08    0.53
   4  -9   3    1.41    0.54
   4   9   3    0.87    0.49
   4  -9  -3    0.68    0.41
  -4   9  -3    1.18    0.58
   4   9  -4    0.96    0.61
   4   9  -4    1.00    0.42
  -4  -9  -4    1.04    0.29
  -4   9   4    1.06    0.56
   4  -9   4    2.45    0.59
   4   9   4    1.63    0.56
   4  -9  -4    1.25    0.47
  -4   9  -4    0.89    0.61
   4   9  -5    8.39    1.09
   4   9  -5    7.32    0.84
  -4   9   5    6.90    1.00
   4  -9   5    8.85    1.01
   4   9   5    7.46    1.01
   4  -9  -5    7.43    0.80
  -4   9  -5    7.16    1.09
   4   9  -6    2.35    0.73
   4   9  -6    1.81    0.51
  -4   9   6    1.07    0.64
   4  -9   6    2.25    0.65
   4   9   6    1.52    0.55
   4  -9  -6    1.43    0.44
  -4   9  -6    1.42    0.59
   4   9  -7    1.61    0.73
   4   9  -7    1.64    0.50
  -4   9   7    1.87    0.68
   4  -9   7    1.10    0.55
   4   9   7    1.90    0.59
   4  -9  -7    1.64    0.45
  -4   9  -7    1.03    0.75
   4   9  -8    1.25    0.41
   4   9  -8    1.38    0.75
  -4   9   8    0.88    0.64
   4  -9   8    1.20    0.53
   4   9   8    0.77    0.66
   4  -9  -8    0.80    0.39
  -4   9  -8    1.22    0.70
   4   9  -9    1.59    0.45
   4   9  -9    1.14    0.78
  -4   9   9    1.90    0.64
   4  -9   9    2.06    0.69
   4   9   9    2.18    0.68
   4  -9  -9   -0.20    0.38
  -4   9  -9    1.56    0.71
   4   9 -10    0.91    0.41
   4   9 -10    1.56    0.76
   4  -9  10    0.94    0.67
   4   9  10    1.10    0.67
  -4   9 -10    0.31    0.68
   4   9 -11    1.25    0.91
  -4   9  11    0.93    0.76
   4  -9  11    2.71    0.86
   4   9  11    3.03    0.81
  -4   9 -11    1.64    0.78
   4   9 -12    0.45    0.58
  -4   9  12   -0.18    0.51
  -4   9 -12   -0.35    0.50
   4   9 -13    1.39    0.92
  -4   9  13    1.39    0.76
   4   9  13    1.77    0.85
  -4   9 -13    0.49    0.84
   4   9 -14    0.35    1.03
  -4   9  14    1.21    0.84
   4  -9  14    2.21    0.91
   4   9  14    1.20    0.88
  -4   9 -14    2.04    0.91
   4   9 -15   -0.18    0.98
  -4   9  15    0.71    0.81
   4  -9  15    1.49    0.86
   4   9  15    1.09    0.87
   5  -9   0    1.89    0.63
  -5   9   0    1.78    0.66
   5   9   0    2.07    0.55
   5   9   0    2.33    0.55
  -5   9   1    0.32    0.39
   5  -9   1    0.03    0.46
   5   9  -1    0.32    0.43
   5   9  -1    0.43    0.41
   5  -9  -1    0.23    0.46
  -5   9  -1    0.49    0.41
   5   9   1    0.16    0.34
   5   9   1    1.44    0.40
  -5   9   2    0.85    0.55
   5  -9   2    0.46    0.54
   5   9  -2    0.90    0.51
   5   9  -2    0.54    0.38
   5  -9  -2    0.68    0.43
  -5   9  -2    1.03    0.57
   5   9   2    1.13    0.35
   5   9   2    1.12    0.48
  -5   9   3    0.24    0.46
   5  -9   3    0.85    0.49
   5   9  -3    0.60    0.33
   5   9  -3   -0.06    0.48
   5  -9  -3    0.31    0.43
  -5   9  -3    0.55    0.51
   5   9   3    0.00    0.44
  -5   9   4    0.40    0.50
   5   9  -4    0.15    0.35
   5   9  -4    0.61    0.54
  -5  -9  -4    0.71    0.24
   5  -9  -4    0.65    0.44
  -5   9  -4    1.00    0.54
   5   9   4    1.14    0.51
  -5   9   5    1.52    0.69
   5  -9   5    2.27    0.74
   5   9  -5    2.58    0.50
   5   9  -5    2.76    0.79
   5  -9  -5    2.38    0.62
  -5   9  -5    2.41    0.77
   5   9   5    2.59    0.71
  -5   9   6    0.08    0.55
   5   9  -6    0.66    0.50
   5   9  -6    0.59    0.36
   5  -9  -6    1.15    0.45
  -5   9  -6    0.74    0.60
   5   9   6    0.84    0.56
  -5   9   7    0.43    0.50
   5  -9   7    0.49    0.54
   5   9  -7   -0.12    0.58
   5   9  -7    0.69    0.33
   5  -9  -7    0.42    0.41
  -5   9  -7    0.53    0.60
   5   9   7   -0.14    0.53
  -5   9   8    0.99    0.60
   5  -9   8   -0.19    0.61
   5   9  -8    1.47    0.70
   5   9  -8    0.92    0.34
   5  -9  -8    0.44    0.40
  -5   9  -8    2.13    0.67
   5   9   8    0.09    0.63
  -5   9   9    0.53    0.61
   5  -9   9    0.67    0.65
   5   9  -9    0.18    0.72
   5   9  -9    0.80    0.38
   5  -9  -9    1.87    0.50
  -5   9  -9    0.34    0.69
   5   9   9    0.95    0.67
  -5   9  10    0.17    0.59
   5  -9  10    0.20    0.51
   5   9 -10   -0.47    0.67
   5  -9 -10    0.96    0.43
  -5   9 -10    0.32    0.51
   5   9  10    1.29    0.64
  -5   9  11    0.07    0.55
   5  -9  11   -0.04    0.58
   5   9 -11    0.67    0.66
  -5   9 -11    0.61    0.59
   5  -9  12    1.06    0.84
   5   9 -12    0.20    0.86
  -5   9 -12    1.11    0.75
   5   9  12    2.40    0.82
  -5   9  13    0.22    0.66
   5   9 -13    2.57    0.95
  -5   9 -13    1.25    0.91
   5   9  13    2.60    0.87
  -5   9  14   -0.17    0.62
   5   9 -14    0.48    0.78
  -5   9 -14    0.14    0.75
   5   9  14    0.96    0.70
  -5   9  15   -0.16    0.84
   5  -9  15    1.05    0.97
   5   9 -15    1.03    1.05
  -5   9 -15    2.96    1.00
   5   9  15    2.45    0.95
   6   9   0    5.72    0.59
   6   9   0    1.82    0.51
   6  -9   0    1.99    0.71
  -6   9   0    2.22    0.73
   6   9  -1    1.18    0.55
   6   9  -1    1.33    0.44
  -6   9   1    1.79    0.61
   6  -9   1    0.99    0.61
   6   9   1    1.39    0.43
   6   9   1    1.83    0.52
   6  -9  -1    0.86    0.58
  -6   9  -1    1.24    0.62
   6   9  -2    0.93    0.58
   6   9  -2    1.60    0.46
  -6   9   2    1.42    0.64
   6  -9   2    1.25    0.49
   6   9   2    1.64    0.40
   6   9   2    1.50    0.52
   6  -9  -2    0.78    0.57
  -6   9  -2    1.23    0.65
   6   9  -3    2.59    0.53
   6   9  -3    2.33    0.73
  -6   9   3    2.95    0.74
   6  -9   3    2.65    0.74
   6   9   3    2.38    0.44
   6   9   3    2.03    0.65
   6  -9  -3    3.39    0.66
  -6   9  -3    3.46    0.79
   6   9  -4    0.76    0.40
   6   9  -4    2.67    0.66
  -6   9   4    1.46    0.60
   6  -9   4    1.51    0.63
   6   9   4    0.70    0.36
   6   9   4    1.84    0.57
   6  -9  -4    1.06    0.56
  -6   9  -4    1.54    0.65
   6   9  -5    2.05    0.78
   6   9  -5    1.13    0.51
  -6   9   5    2.87    0.72
   6  -9   5    2.62    0.76
   6   9   5    2.63    0.71
   6  -9  -5    2.32    0.65
  -6   9  -5    2.94    0.65
   6   9  -6   -0.14    0.63
   6   9  -6    0.57    0.34
  -6   9   6    1.22    0.55
   6  -9   6    1.12    0.60
   6   9   6    0.65    0.58
   6  -9  -6    1.41    0.44
  -6   9  -6   -0.06    0.66
   6   9  -7    0.81    0.54
   6   9  -7    0.21    0.32
  -6   9   7    0.19    0.55
   6  -9   7    0.94    0.48
   6   9   7    1.27    0.59
   6  -9  -7    1.30    0.46
  -6   9  -7    0.19    0.66
   6   9  -8    0.35    0.65
  -6   9   8   -0.31    0.53
   6  -9   8    1.33    0.60
   6   9   8   -0.34    0.58
   6  -9  -8    1.26    0.46
  -6   9  -8    0.24    0.51
   6   9  -9    0.68    0.69
  -6   9   9    0.17    0.56
   6  -9   9    0.04    0.51
   6  -9  -9    1.31    0.50
  -6   9  -9    0.66    0.66
   6   9 -10    1.41    0.72
  -6   9  10    0.18    0.49
   6  -9  10    0.37    0.61
   6   9  10    0.21    0.64
  -6   9 -10    0.49    0.64
   6   9 -11    0.30    0.66
  -6   9  11    0.29    0.55
   6  -9  11    0.81    0.59
  -6   9 -11   -0.46    0.58
  -6   9  12    0.20    0.75
   6  -9  12    1.90    0.79
   6   9  12    1.94    0.83
  -6   9 -12    1.11    0.87
   6   9 -13    0.75    0.76
  -6   9  13    0.95    0.68
   6   9  13    1.26    0.68
  -6   9 -13    1.36    0.86
   6   9 -14    1.09    0.78
  -6   9  14    0.41    0.79
   6  -9  14    0.12    0.88
  -6   9 -14    2.15    0.91
   7   9   0   -0.22    0.43
   7   9   0    0.90    0.38
   7  -9   0    0.66    0.52
  -7   9   0    0.23    0.51
   7   9  -1    0.80    0.40
   7   9  -1    0.46    0.36
  -7   9   1    0.02    0.48
   7  -9   1   -0.01    0.47
   7   9   1   -0.07    0.37
   7  -9  -1    0.22    0.45
  -7   9  -1    0.17    0.49
   7   9  -2    0.48    0.37
   7   9  -2    0.20    0.55
  -7   9   2    1.25    0.58
   7  -9   2    1.45    0.59
   7   9   2    0.86    0.37
   7   9   2    1.01    0.45
   7  -9  -2    0.95    0.55
  -7   9  -2    0.97    0.59
   7   9  -3    2.27    0.47
   7   9  -3    3.98    0.70
  -7   9   3    2.17    0.70
   7  -9   3    1.67    0.56
   7   9   3    1.40    0.41
   7   9   3    1.68    0.54
   7  -9  -3    1.34    0.65
  -7   9  -3    1.93    0.60
   7   9  -4    0.12    0.35
   7   9  -4    1.38    0.58
  -7   9   4    0.89    0.57
   7  -9   4    1.66    0.49
   7   9   4    0.18    0.29
   7   9   4    1.13    0.47
   7  -9  -4    1.07    0.53
  -7   9  -4    1.89    0.63
   7   9  -5    0.47    0.54
   7   9  -5    0.52    0.32
  -7   9   5    0.09    0.48
   7  -9   5    0.20    0.52
   7  -9  -5   -0.12    0.46
  -7   9  -5    0.33    0.56
   7   9  -6    1.45    0.75
  -7   9   6    1.30    0.63
   7  -9   6    1.85    0.70
   7   9   6    0.89    0.68
   7  -9  -6    1.55    0.62
  -7   9  -6    1.01    0.78
   7   9  -7    0.27    0.63
  -7   9   7    0.23    0.53
   7  -9   7   -0.15    0.56
   7   9   7    1.27    0.56
   7  -9  -7    0.57    0.48
   7   9  -8   -0.08    0.78
  -7   9   8    1.03    0.55
   7  -9   8    1.58    0.68
   7   9   8    1.27    0.55
   7  -9  -8    1.42    0.57
  -7   9  -8    1.27    0.73
   7   9  -9   -0.41    0.68
  -7   9   9    0.04    0.54
   7  -9   9    1.11    0.62
   7  -9  -9    1.25    0.53
  -7   9  -9    0.26    0.64
   7   9 -10   -0.48    0.76
  -7   9  10    1.37    0.59
   7  -9  10    1.06    0.68
   7  -9 -10    0.43    0.60
   7   9 -11   -0.22    0.77
  -7   9  11   -0.09    0.53
   7   9  11    1.08    0.59
  -7   9 -11    1.97    0.71
   7   9 -12    1.62    0.95
  -7   9  12    0.23    0.72
   7  -9  12    0.83    0.86
   7   9  12    3.14    0.85
  -7   9 -12    1.07    0.88
  -7   9  13    0.92    0.65
   7  -9  13   -0.41    0.76
   7   9  13    1.16    0.78
  -7   9 -13    0.24    0.79
   7   9 -14    0.43    1.10
   7  -9  14    1.39    1.00
  -7   9 -14    2.15    1.03
   8   9   0    0.97    0.37
   8  -9   0   -0.14    0.44
  -8   9   0    0.21    0.44
   8   9  -1    0.94    0.49
   8   9  -1    1.02    0.37
  -8   9   1    0.28    0.56
   8  -9   1    0.25    0.56
   8   9   1    0.82    0.44
   8  -9  -1   -0.16    0.55
  -8   9  -1    0.21    0.47
   8   9  -2    0.67    0.55
  -8   9   2    1.09    0.59
   8  -9   2    0.34    0.60
   8   9   2    0.71    0.42
   8   9   2    1.32    0.44
   8  -9  -2    0.28    0.57
  -8   9  -2    0.32    0.62
   8   9  -3    0.83    0.31
   8   9  -3    1.04    0.52
  -8   9   3    0.39    0.52
   8  -9   3    0.20    0.46
   8   9   3   -0.15    0.32
   8   9   3    0.77    0.45
   8  -9  -3    0.39    0.54
  -8   9  -3    0.21    0.47
   8   9  -4    1.77    0.52
  -8   9   4   -0.23    0.58
   8  -9   4    0.58    0.62
   8  -9  -4    0.29    0.57
  -8   9  -4    1.16    0.56
   8   9  -5    1.21    0.69
  -8   9   5    1.29    0.62
   8  -9   5    1.21    0.68
   8  -9  -5    0.34    0.61
  -8   9  -5    1.45    0.64
   8   9  -6    0.16    0.57
  -8   9   6   -0.33    0.50
   8  -9   6    0.86    0.53
   8   9   6    0.23    0.51
  -8   9  -6    0.37    0.49
   8   9  -7    0.33    0.62
  -8   9   7    0.24    0.48
   8  -9   7   -0.13    0.56
   8   9   7    0.48    0.55
  -8   9  -7    0.64    0.50
   8   9  -8    0.06    0.63
  -8   9   8   -0.12    0.49
   8  -9   8    0.05    0.58
   8   9   8    1.05    0.56
   8  -9  -8   -0.29    0.52
  -8   9  -8    1.02    0.59
   8   9  -9   -0.08    0.77
  -8   9   9    1.20    0.58
   8  -9   9    0.49    0.66
   8   9   9   -0.17    0.71
   8  -9  -9    1.77    0.63
  -8   9  -9    0.58    0.72
   8   9 -10    0.32    0.79
  -8   9  10    1.15    0.52
   8  -9  10    0.55    0.69
   8  -9 -10    0.29    0.57
  -8   9 -10    0.61    0.72
  -8   9  11    1.16    0.64
   8  -9  11    0.21    0.74
   8   9  11   -0.36    0.76
  -8   9 -11    1.74    0.79
   8   9 -12   -0.43    0.93
  -8   9  12    0.60    0.60
   8  -9  12    1.09    0.80
   8   9  12    2.03    0.83
  -8   9 -12    1.56    0.89
   8   9 -13    0.88    1.04
   8  -9  13    1.21    0.93
   8   9  13    1.34    0.97
  -8   9 -13    1.99    1.03
   9   9   0   -0.07    0.30
   9  -9   0    1.05    0.49
  -9   9   0    0.14    0.51
   9   9  -1    0.85    0.60
   9   9  -1    0.84    0.34
  -9   9   1    0.81    0.59
   9  -9   1    0.36    0.61
   9   9   1    0.24    0.47
   9   9   1    1.13    0.42
   9  -9  -1    0.29    0.62
  -9   9  -1    1.04    0.62
   9   9  -2    1.21    0.35
   9   9  -2    0.08    0.54
  -9   9   2   -0.40    0.59
   9  -9   2    0.44    0.50
   9  -9  -2    0.77    0.50
  -9   9  -2    0.81    0.63
   9   9  -3    2.22    0.73
  -9   9   3    0.93    0.65
   9  -9   3    1.40    0.70
   9   9   3    1.17    0.40
   9   9   3    1.13    0.48
   9  -9  -3    0.44    0.68
  -9   9  -3    1.22    0.59
   9   9  -4    0.58    0.66
  -9   9   4   -0.17    0.49
   9  -9   4    0.00    0.48
   9  -9  -4    0.89    0.58
  -9   9  -4    2.33    0.67
   9   9  -5    0.72    0.84
  -9   9   5    1.30    0.71
   9  -9   5    0.22    0.74
   9   9   5    2.02    0.65
   9  -9  -5    2.44    0.69
  -9   9  -5    1.69    0.82
   9   9  -6    1.08    0.71
  -9   9   6    0.14    0.55
   9  -9   6    0.28    0.49
   9   9   6    0.27    0.55
   9  -9  -6    0.39    0.54
   9   9  -7    0.96    0.88
  -9   9   7    0.95    0.61
   9   9   7    1.06    0.68
   9  -9  -7    0.90    0.65
  -9   9  -7    1.50    0.77
   9   9  -8    0.53    0.74
  -9   9   8    0.53    0.59
   9  -9   8    0.02    0.68
   9  -9  -8    0.99    0.64
  -9   9  -8    1.27    0.72
   9   9  -9    1.16    0.80
  -9   9   9    1.46    0.63
   9  -9   9    1.22    0.74
   9  -9  -9   -0.31    0.70
  -9   9  -9    0.11    0.75
   9   9 -10    1.49    0.81
  -9   9  10   -0.22    0.61
   9  -9  10   -0.30    0.73
   9  -9 -10    1.54    0.65
  -9   9 -10    1.19    0.78
   9   9 -11    1.29    0.89
   9  -9  11    0.02    0.80
  -9   9 -11    1.17    0.71
   9   9 -12    0.82    1.14
   9  -9  12    1.88    1.02
   9   9  12    3.69    1.04
  10  -9   0   -0.03    0.55
 -10   9   0    1.21    0.64
  10   9   0    0.82    0.36
  10   9  -1   -0.10    0.59
  10  -9   1    0.93    0.66
  10   9   1    1.44    0.58
  10   9   1    0.99    0.39
 -10   9  -1    0.96    0.69
  10   9  -2    1.19    0.80
 -10   9   2    1.50    0.73
  10  -9   2    1.45    0.78
  10   9   2    1.83    0.50
  10  -9  -2    1.79    0.78
 -10   9  -2    1.15    0.82
  10   9   2    1.50    0.49
  10   9  -3    1.61    0.73
 -10   9   3    1.60    0.64
  10  -9   3    0.26    0.70
  10   9   3   -0.16    0.50
  10  -9  -3   -0.04    0.66
 -10   9  -3    3.01    0.75
 -10   9   4    0.55    0.67
  10  -9   4    1.16    0.71
  10   9  -4    1.18    0.79
  10   9   4    2.24    0.60
  10  -9  -4    0.61    0.73
 -10   9  -4   -0.18    0.75
 -10   9   5    1.04    0.56
  10  -9   5    0.02    0.69
  10   9   5    1.71    0.61
  10  -9  -5    0.32    0.67
 -10   9  -5    0.80    0.76
  10   9  -6   -0.08    0.85
 -10   9   6    1.40    0.67
  10  -9   6    0.09    0.72
  10   9   6    0.90    0.66
  10  -9  -6    1.41    0.69
 -10   9  -6    1.69    0.76
  10   9  -7    0.53    0.79
  10  -9   7   -0.26    0.64
  10  -9  -7    0.18    0.64
 -10   9  -7    1.33    0.69
  10   9  -8    1.22    0.96
 -10   9   8    1.53    0.64
  10  -9   8    0.00    0.80
  10   9   8    1.94    0.69
  10  -9  -8    0.33    0.71
 -10   9  -8    1.13    0.68
  10   9  -9    2.90    1.06
 -10   9   9    1.12    0.77
  10  -9   9    0.12    0.87
  10   9   9    1.53    0.85
  10  -9  -9    2.37    0.86
  10   9 -10    2.23    0.89
  10  -9  10    0.46    0.80
  10   9  10   -0.39    0.81
  10  -9 -10    0.77    0.79
  10   9 -11    0.34    0.56
  10  -9  11   -0.18    0.59
 -10   9 -11   -0.03    0.66
[truncated: 88,105 more chars]
