# Supplementary material
Source: MDPI journal article supplement (https://www.mdpi.com/2073-4352/9/4/184)
Supplement: s1 [file s1 › cif-323K .cif]

 
data_1
 
_audit_creation_method            'SHELXL-2014/7'
_shelx_SHELXL_version_number      '2014/7'
_chemical_name_systematic         ?
_chemical_name_common             ?
_chemical_melting_point           ?
_chemical_formula_moiety          ?
_chemical_formula_sum
 'C18 H30 F8 N O6 P' 
_chemical_formula_weight          539.40

loop_
 _atom_type_symbol
 _atom_type_description
 _atom_type_scat_dispersion_real
 _atom_type_scat_dispersion_imag
 _atom_type_scat_source
 'C'  'C'   0.0033   0.0016
 'International Tables Vol C Tables 4.2.6.8 and 6.1.1.4'
 'H'  'H'   0.0000   0.0000
 'International Tables Vol C Tables 4.2.6.8 and 6.1.1.4'
 'N'  'N'   0.0061   0.0033
 'International Tables Vol C Tables 4.2.6.8 and 6.1.1.4'
 'O'  'O'   0.0106   0.0060
 'International Tables Vol C Tables 4.2.6.8 and 6.1.1.4'
 'F'  'F'   0.0171   0.0103
 'International Tables Vol C Tables 4.2.6.8 and 6.1.1.4'
 'P'  'P'   0.1023   0.0942
 'International Tables Vol C Tables 4.2.6.8 and 6.1.1.4'
 
_space_group_crystal_system       orthorhombic
_space_group_IT_number            36
_space_group_name_H-M_alt         'C m c 21'
_space_group_name_Hall            'C 2c -2'
 
_shelx_space_group_comment
;
The symmetry employed for this shelxl refinement is uniquely defined
by the following loop, which should always be used as a source of
symmetry information in preference to the above space-group names.
They are only intended as comments.
;
 
loop_
 _space_group_symop_operation_xyz
 'x, y, z'
 '-x, -y, z+1/2'
 'x, -y, z+1/2'
 '-x, y, z'
 'x+1/2, y+1/2, z'
 '-x+1/2, -y+1/2, z+1/2'
 'x+1/2, -y+1/2, z+1/2'
 '-x+1/2, y+1/2, z'
 
_cell_length_a                    11.9791(10)
_cell_length_b                    13.6041(12)
_cell_length_c                    15.4202(8)
_cell_angle_alpha                 90
_cell_angle_beta                  90
_cell_angle_gamma                 90
_cell_volume                      2513.0(3)
_cell_formula_units_Z             4
_cell_measurement_temperature     323(2)
_cell_measurement_reflns_used   1402
_cell_measurement_theta_min     2.6110
_cell_measurement_theta_max     30.9330
 
_exptl_crystal_description        block
_exptl_crystal_colour             colorless
_exptl_crystal_density_meas       ?
_exptl_crystal_density_method     ?
_exptl_crystal_density_diffrn     1.423          
_exptl_crystal_F_000              1116
_exptl_transmission_factor_min    ?
_exptl_transmission_factor_max    ?
_exptl_crystal_size_max           0.23
_exptl_crystal_size_mid           0.22
_exptl_crystal_size_min           0.20
_exptl_absorpt_coefficient_mu     0.201
_shelx_estimated_absorpt_T_min    ?
_shelx_estimated_absorpt_T_max    ?
_exptl_absorpt_correction_T_min                   0.12781
_exptl_absorpt_correction_T_max                   1.00000
_exptl_absorpt_correction_type            multi-scan
_exptl_absorpt_process_details    ?
_exptl_absorpt_special_details    ?
_diffrn_ambient_temperature       323(2)
_diffrn_radiation_wavelength      0.71073
_diffrn_radiation_type            MoK\a
_diffrn_source                    ?
_diffrn_measurement_device_type   'Rigaku synergy XTaLAB'
_diffrn_measurement_method        ?
_diffrn_detector_area_resol_mean  ?
_diffrn_reflns_number             8228
_diffrn_reflns_av_unetI/netI      0.0306
_diffrn_reflns_av_R_equivalents   0.0209
_diffrn_reflns_limit_h_min        -17
_diffrn_reflns_limit_h_max        13
_diffrn_reflns_limit_k_min        -19
_diffrn_reflns_limit_k_max        14
_diffrn_reflns_limit_l_min        -19
_diffrn_reflns_limit_l_max        20
_diffrn_reflns_theta_min          2.622
_diffrn_reflns_theta_max          31.569
_diffrn_reflns_theta_full         25.242
_diffrn_measured_fraction_theta_max   0.822
_diffrn_measured_fraction_theta_full  0.999
_diffrn_reflns_Laue_measured_fraction_max    0.822
_diffrn_reflns_Laue_measured_fraction_full   0.999
_diffrn_reflns_point_group_measured_fraction_max   0.731
_diffrn_reflns_point_group_measured_fraction_full  0.951
_reflns_number_total              3219
_reflns_number_gt                 1336
_reflns_threshold_expression      'I > 2\s(I)'
_reflns_Friedel_coverage          0.720
_reflns_Friedel_fraction_max      0.634
_reflns_Friedel_fraction_full     0.899
 
_reflns_special_details
;
 Reflections were merged by SHELXL according to the crystal
 class for the calculation of statistics and refinement.
 
 _reflns_Friedel_fraction is defined as the number of unique
 Friedel pairs measured divided by the number that would be
 possible theoretically, ignoring centric projections and
 systematic absences.
;
 
_computing_data_collection        ?
_computing_cell_refinement        ?
_computing_data_reduction         ?
_computing_structure_solution     ?
_computing_structure_refinement 'SHELXL-2014/7 (Sheldrick, 2014)'
_computing_molecular_graphics     ?
_computing_publication_material   ?
_refine_special_details           ?
_refine_ls_structure_factor_coef  Fsqd
_refine_ls_matrix_type            full
_refine_ls_weighting_scheme       calc
_refine_ls_weighting_details
'w=1/[\s^2^(Fo^2^)+(0.2000P)^2^] where P=(Fo^2^+2Fc^2^)/3'
_atom_sites_solution_primary      ?
_atom_sites_solution_secondary    ?
_atom_sites_solution_hydrogens    mixed
_refine_ls_hydrogen_treatment     constr
_refine_ls_extinction_method      none
_refine_ls_extinction_coef        .
_refine_ls_abs_structure_details
;
 Flack x determined using 424 quotients [(I+)-(I-)]/[(I+)+(I-)]
 (Parsons, Flack and Wagner, Acta Cryst. B69 (2013) 249-259).
;
_refine_ls_abs_structure_Flack    0.19(8)
_chemical_absolute_configuration  ?
_refine_ls_number_reflns          3219
_refine_ls_number_parameters      244
_refine_ls_number_restraints      326
_refine_ls_R_factor_all           0.2634
_refine_ls_R_factor_gt            0.1896
_refine_ls_wR_factor_ref          0.4942
_refine_ls_wR_factor_gt           0.4522
_refine_ls_goodness_of_fit_ref    1.536
_refine_ls_restrained_S_all       1.536
_refine_ls_shift/su_max           0.000
_refine_ls_shift/su_mean          0.000
 
loop_
 _atom_site_label
 _atom_site_type_symbol
 _atom_site_fract_x
 _atom_site_fract_y
 _atom_site_fract_z
 _atom_site_U_iso_or_equiv
 _atom_site_adp_type
 _atom_site_occupancy
 _atom_site_site_symmetry_order  
 _atom_site_calc_flag
 _atom_site_refinement_flags_posn
 _atom_site_refinement_flags_adp
 _atom_site_refinement_flags_occupancy
 _atom_site_disorder_assembly
 _atom_site_disorder_group
F3 F 0.0000 0.030(4) 0.7659(13) 0.37(2) Uani 1 2 d DS TU P . .
F4 F 0.0000 -0.0148(17) 0.9602(10) 0.220(8) Uani 1 2 d DS TU P . .
F5 F 0.1197(13) 0.0562(17) 0.8642(10) 0.275(9) Uani 1 1 d D U . . .
F6 F -0.0938(13) -0.0684(13) 0.8605(14) 0.254(7) Uani 1 1 d D U . . .
P1 P 0.0000 0.0093(4) 0.8634(5) 0.1293(19) Uani 1 2 d DS TU P . .
C7 C 0.224(4) 0.395(3) 0.227(2) 0.225(9) Uani 0.5 1 d D U P A -1
H7A H 0.2968 0.3729 0.2458 0.270 Uiso 0.5 1 d R U P A -1
H7B H 0.2045 0.4506 0.2618 0.270 Uiso 0.5 1 d R U P A -1
C8 C 0.140(3) 0.314(3) 0.240(3) 0.233(9) Uani 0.5 1 d D U P A -1
H8A H 0.1169 0.3177 0.2993 0.280 Uiso 0.5 1 d R U P A -1
H8B H 0.1768 0.2521 0.2317 0.280 Uiso 0.5 1 d R U P A -1
C9 C -0.038(3) 0.377(3) 0.241(2) 0.232(8) Uani 0.5 1 d D U P A -1
H9A H -0.0245 0.3661 0.3020 0.278 Uiso 0.5 1 d R U P A -1
H9B H -0.0368 0.4464 0.2297 0.278 Uiso 0.5 1 d R U P A -1
C10 C -0.149(2) 0.334(3) 0.220(3) 0.231(9) Uani 0.5 1 d D U P A -1
H10A H -0.2046 0.3351 0.2642 0.277 Uiso 0.5 1 d R U P A -1
H10B H -0.1372 0.2681 0.2001 0.277 Uiso 0.5 1 d R U P A -1
C11 C -0.268(4) 0.455(3) 0.162(2) 0.209(8) Uani 0.5 1 d D U P A -1
H11A H -0.3309 0.4149 0.1778 0.250 Uiso 0.5 1 d R U P A -1
H11B H -0.2489 0.4964 0.2098 0.250 Uiso 0.5 1 d R U P A -1
C12 C -0.300(3) 0.513(3) 0.083(3) 0.197(8) Uani 0.5 1 d D U P A -1
H12A H -0.3705 0.5457 0.0889 0.237 Uiso 0.5 1 d R U P A -1
H12B H -0.3009 0.4726 0.0324 0.237 Uiso 0.5 1 d R U P A -1
C13 C -0.221(3) 0.650(3) 0.013(2) 0.188(8) Uani 0.5 1 d D U P A -1
H13A H -0.2246 0.6137 -0.0404 0.225 Uiso 0.5 1 d R U P A -1
H13B H -0.2913 0.6834 0.0203 0.225 Uiso 0.5 1 d R U P A -1
C14 C -0.1297(18) 0.725(2) 0.006(3) 0.182(8) Uani 0.5 1 d D U P A -1
H14A H -0.1235 0.7609 0.0596 0.219 Uiso 0.5 1 d R U P A -1
H14B H -0.1425 0.7704 -0.0402 0.219 Uiso 0.5 1 d R U P A -1
C15 C 0.0609(18) 0.738(2) -0.010(3) 0.179(8) Uani 0.5 1 d D U P A -1
H15A H 0.0559 0.7819 -0.0580 0.215 Uiso 0.5 1 d R U P A -1
H15B H 0.0651 0.7747 0.0432 0.215 Uiso 0.5 1 d R U P A -1
C16 C 0.158(3) 0.669(3) -0.017(2) 0.195(8) Uani 0.5 1 d D U P A -1
H16A H 0.2243 0.7062 -0.0295 0.234 Uiso 0.5 1 d R U P A -1
H16B H 0.1447 0.6259 -0.0653 0.234 Uiso 0.5 1 d R U P A -1
C17 C 0.294(2) 0.580(3) 0.055(3) 0.203(8) Uani 0.5 1 d D U P A -1
H17A H 0.2994 0.5328 0.0091 0.244 Uiso 0.5 1 d R U P A -1
H17B H 0.3499 0.6294 0.0498 0.244 Uiso 0.5 1 d R U P A -1
C18 C 0.292(4) 0.515(3) 0.134(3) 0.215(8) Uani 0.5 1 d D U P A -1
H18A H 0.2562 0.5588 0.1745 0.258 Uiso 0.5 1 d R U P A -1
H18B H 0.3674 0.5050 0.1538 0.258 Uiso 0.5 1 d R U P A -1
O1 O 0.228(3) 0.4237(19) 0.136(2) 0.228(7) Uani 0.5 1 d D U P A -1
O2 O 0.0381(17) 0.316(2) 0.188(2) 0.228(7) Uani 0.5 1 d D U P A -1
O3 O -0.177(2) 0.387(2) 0.1404(19) 0.220(8) Uani 0.5 1 d D U P A -1
O4 O -0.206(2) 0.5806(18) 0.0837(18) 0.190(7) Uani 0.5 1 d D U P A -1
O5 O -0.0308(15) 0.6658(16) -0.0104(15) 0.177(7) Uani 0.5 1 d D U P A -1
O6 O 0.1753(19) 0.604(2) 0.0574(19) 0.196(7) Uani 0.5 1 d D U P A -1
N1 N 0.0000 0.4763(8) 1.0529(8) 0.102(3) Uani 1 2 d DS T P . .
H1A H 0.0701 0.4867 1.0699 0.152 Uiso 0.5 1 d R U P . .
H1B H -0.0365 0.5335 1.0510 0.152 Uiso 0.5 1 d R U P . .
H1C H -0.0336 0.4359 1.0904 0.152 Uiso 0.5 1 d R U P . .
C1 C 0.0000 0.4269(9) 0.9685(9) 0.097(3) Uani 1 2 d DS TU P . .
C2 C -0.1045(11) 0.4065(9) 0.9294(9) 0.131(3) Uani 1 1 d D U . . .
H2A H -0.1725 0.4250 0.9536 0.158 Uiso 1 1 calc R U . . .
C3 C -0.0955(12) 0.3565(10) 0.8523(10) 0.147(4) Uani 1 1 d D U . . .
C4 C 0.0000 0.3370(13) 0.8116(11) 0.139(5) Uani 1 2 d DS TU P . .
F1 F 0.0000 0.2914(14) 0.7344(8) 0.198(6) Uani 1 2 d DS TU P . .
F2 F -0.1808(19) 0.3222(19) 0.8147(16) 0.213(10) Uani 0.5 1 d D . P . .
 
loop_
 _atom_site_aniso_label
 _atom_site_aniso_U_11
 _atom_site_aniso_U_22
 _atom_site_aniso_U_33
 _atom_site_aniso_U_23
 _atom_site_aniso_U_13
 _atom_site_aniso_U_12
F3 0.117(11) 0.82(7) 0.176(18) 0.16(3) 0.000 0.000
F4 0.214(15) 0.35(2) 0.095(9) 0.033(11) 0.000 0.000
F5 0.281(16) 0.39(2) 0.154(9) -0.020(14) 0.040(12) -0.143(15)
F6 0.201(10) 0.287(14) 0.274(16) 0.064(15) -0.031(11) -0.057(11)
P1 0.126(3) 0.169(4) 0.093(3) 0.027(3) 0.000 0.000
C7 0.225(9) 0.225(9) 0.225(9) 0.000(4) -0.001(4) 0.000(4)
C8 0.234(9) 0.233(9) 0.233(9) 0.001(4) 0.001(4) 0.002(4)
C9 0.232(9) 0.231(9) 0.233(9) 0.002(4) -0.001(4) 0.000(4)
C10 0.232(9) 0.231(9) 0.231(9) 0.002(4) 0.000(4) -0.002(4)
C11 0.209(9) 0.208(9) 0.209(9) 0.000(4) 0.002(4) 0.000(4)
C12 0.197(9) 0.198(9) 0.197(9) -0.002(4) 0.000(4) 0.000(4)
C13 0.187(8) 0.188(8) 0.188(8) -0.001(4) 0.000(4) 0.001(4)
C14 0.183(8) 0.182(8) 0.182(8) -0.001(4) -0.002(4) 0.001(4)
C15 0.179(8) 0.179(8) 0.179(8) 0.001(4) -0.001(4) -0.002(4)
C16 0.195(8) 0.195(8) 0.195(8) 0.000(4) 0.000(4) 0.000(4)
C17 0.203(8) 0.204(8) 0.203(9) 0.000(4) 0.000(4) -0.002(4)
C18 0.214(9) 0.216(9) 0.215(9) 0.000(4) 0.001(4) 0.000(4)
O1 0.228(7) 0.228(7) 0.227(7) 0.001(3) -0.002(3) -0.001(3)
O2 0.228(7) 0.228(7) 0.227(7) 0.001(3) -0.002(3) -0.001(3)
O3 0.220(9) 0.220(9) 0.220(9) 0.003(4) 0.003(4) -0.003(4)
O4 0.190(8) 0.191(8) 0.190(8) -0.005(4) 0.001(4) -0.001(4)
O5 0.179(8) 0.177(7) 0.176(7) -0.003(4) 0.000(4) 0.000(4)
O6 0.197(8) 0.195(8) 0.195(8) -0.002(4) 0.001(4) 0.000(4)
N1 0.124(8) 0.107(8) 0.073(6) -0.007(5) 0.000 0.000
C1 0.098(4) 0.097(4) 0.097(4) 0.0001(14) 0.000 0.000
C2 0.132(4) 0.131(4) 0.131(4) -0.0014(14) 0.0005(14) -0.0009(14)
C3 0.186(9) 0.136(7) 0.119(7) -0.031(6) -0.011(7) -0.021(6)
C4 0.194(13) 0.127(9) 0.097(8) -0.021(7) 0.000 0.000
F1 0.233(14) 0.252(14) 0.110(7) -0.083(9) 0.000 0.000
F2 0.197(17) 0.26(2) 0.185(17) -0.090(16) -0.048(13) -0.062(18)
 
_geom_special_details
;
 All esds (except the esd in the dihedral angle between two l.s. planes)
 are estimated using the full covariance matrix.  The cell esds are taken
 into account individually in the estimation of esds in distances, angles
 and torsion angles; correlations between esds in cell parameters are only
 used when they are defined by crystal symmetry.  An approximate (isotropic)
 treatment of cell esds is used for estimating esds involving l.s. planes.
;
 
loop_
 _geom_bond_atom_site_label_1
 _geom_bond_atom_site_label_2
 _geom_bond_distance
 _geom_bond_site_symmetry_2
 _geom_bond_publ_flag
F3 P1 1.530(16) . ?
F4 P1 1.528(14) . ?
F5 P1 1.569(12) . ?
F5 F6 1.72(3) 4 ?
F6 P1 1.543(12) . ?
F6 F5 1.72(3) 4 ?
P1 F6 1.543(12) 4 ?
P1 F5 1.569(12) 4 ?
C7 O1 1.467(14) . ?
C7 C8 1.501(14) . ?
C8 O2 1.459(14) . ?
C9 O2 1.476(14) . ?
C9 C10 1.490(14) . ?
C10 O3 1.458(14) . ?
C11 O3 1.467(14) . ?
C11 C12 1.496(14) . ?
C12 O4 1.454(13) . ?
C13 O4 1.455(13) . ?
C13 C14 1.501(14) . ?
C14 O5 1.455(13) . ?
C15 O5 1.469(13) . ?
C15 C16 1.497(14) . ?
C16 O6 1.462(13) . ?
C17 O6 1.456(14) . ?
C17 C18 1.497(14) . ?
C18 O1 1.465(14) . ?
N1 C1 1.464(15) . ?
C1 C2 1.417(14) 4 ?
C1 C2 1.417(14) . ?
C2 C3 1.375(16) . ?
C3 F2 1.264(18) . ?
C3 C4 1.332(15) . ?
C4 C3 1.332(15) 4 ?
C4 F1 1.342(17) . ?
 
loop_
 _geom_angle_atom_site_label_1
 _geom_angle_atom_site_label_2
 _geom_angle_atom_site_label_3
 _geom_angle
 _geom_angle_site_symmetry_1
 _geom_angle_site_symmetry_3
 _geom_angle_publ_flag
P1 F5 F6 55.6(7) . 4 ?
P1 F6 F5 57.1(8) . 4 ?
F4 P1 F3 178(2) . . ?
F4 P1 F6 83.2(10) . 4 ?
F3 P1 F6 95.6(15) . 4 ?
F4 P1 F6 83.2(10) . . ?
F3 P1 F6 95.5(15) . . ?
F6 P1 F6 93.4(15) 4 . ?
F4 P1 F5 94.6(7) . . ?
F3 P1 F5 86.2(10) . . ?
F6 P1 F5 67.3(11) 4 . ?
F6 P1 F5 160.7(12) . . ?
F4 P1 F5 94.6(7) . 4 ?
F3 P1 F5 86.2(10) . 4 ?
F6 P1 F5 160.7(12) 4 4 ?
F6 P1 F5 67.3(11) . 4 ?
F5 P1 F5 132.0(18) . 4 ?
O1 C7 C8 110(4) . . ?
O2 C8 C7 119(4) . . ?
O2 C9 C10 101.8(17) . . ?
O3 C10 C9 101.5(17) . . ?
O3 C11 C12 110(3) . . ?
O4 C12 C11 98(3) . . ?
O4 C13 C14 113(3) . . ?
O5 C14 C13 103(2) . . ?
O5 C15 C16 100(2) . . ?
O6 C16 C15 115(3) . . ?
O6 C17 C18 96(3) . . ?
O1 C18 C17 121(3) . . ?
C18 O1 C7 104.9(18) . . ?
C8 O2 C9 102.9(18) . . ?
C10 O3 C11 106.9(18) . . ?
C12 O4 C13 107.9(17) . . ?
C14 O5 C15 103.9(15) . . ?
C17 O6 C16 105.1(17) . . ?
C2 C1 C2 124.1(14) 4 . ?
C2 C1 N1 117.9(7) 4 . ?
C2 C1 N1 117.9(7) . . ?
C3 C2 C1 113.3(11) . . ?
F2 C3 C4 113.9(14) . . ?
F2 C3 C2 121.1(17) . . ?
C4 C3 C2 125.0(13) . . ?
C3 C4 C3 118.5(15) 4 . ?
C3 C4 F1 120.6(7) 4 . ?
C3 C4 F1 120.6(8) . . ?

 
_refine_diff_density_max    0.779
_refine_diff_density_min   -0.462
_refine_diff_density_rms    0.159

_shelx_res_file
;

    1.res created by SHELXL-2014/7


TITL 1 in Cmc2(1)
CELL 0.71073  11.9791  13.6041  15.4202  90.000  90.000  90.000
ZERR   4   0.0010   0.0012   0.0008   0.000   0.000   0.000
LATT -7
SYMM -X, -Y, 0.5+Z
SYMM X, -Y, 0.5+Z
SYMM -X, Y, Z
SFAC C H N O F P
UNIT 72 116 4 24 32 4

L.S. 24
BOND
ACTA
TEMP 50
FMAP 2
PLAN 20
DFIX 2.3 O3 C9 O2 C10
DFIX 1.5  0.01 C7 C8 C9 C10 C11 C12 C13 C14 C15 C16 C17 C18
dfix 2.3  C8 C9 C10 C11 C12 C13 C14 C15 C16 C17 C18 C7
DFIX 2.82 O1 O2 O2 O3 O3 O4 O4 O5 O5 O6 O6 O1
DFIX 1.48  0.01 O1 C18 O1 C7 O2 C8 O2 C9 O3 C10 O3 C11
DFIX 1.48 0.01 O4 C12 O4 C13 O5 C14 O5 C15 O6 C16 O6 C17
DFIX 1.55 P1 F6 P1 F5 P1 F4 P1 F3
DFIX 1.39 F1 C4 F2 C3
DFIX 1.42 C1 C2 C2 C3 C3 C4
DFIX 1.45 N1 C1
ISOR 0.003 C7 > O6
ISOR F6 F5 F4 F3
EADP O1 O2
ISOR 0.001 C1 C2
SIMU 0.01 C7 > O6
SIMU 0.01 C1 > C4
SIMU F1 C4
DELU F1 C4
SIMU  F6 p1
WGHT    0.200000
FVAR       0.23416
F3    5    0.000000    0.029974    0.765922    10.50000    0.11655    0.81816 =
         0.17648    0.15702    0.00000    0.00000
F4    5    0.000000   -0.014802    0.960246    10.50000    0.21366    0.35258 =
         0.09497    0.03345    0.00000    0.00000
F5    5    0.119670    0.056230    0.864241    11.00000    0.28108    0.38959 =
         0.15397   -0.02028    0.03996   -0.14313
F6    5   -0.093760   -0.068362    0.860479    11.00000    0.20069    0.28748 =
         0.27395    0.06395   -0.03131   -0.05681
P1    6    0.000000    0.009311    0.863446    10.50000    0.12610    0.16900 =
         0.09281    0.02718    0.00000    0.00000
PART -1
C7    1    0.224429    0.394650    0.227129    10.50000    0.22549    0.22494 =
         0.22504   -0.00041   -0.00071   -0.00015
AFIX   3
H7A   2    0.296759    0.372880    0.245849    10.50000   -1.20000
H7B   2    0.204459    0.450590    0.261769    10.50000   -1.20000
AFIX   0
C8    1    0.140209    0.314204    0.239853    10.50000    0.23365    0.23316 =
         0.23307    0.00081    0.00091    0.00179
AFIX   3
H8A   2    0.116939    0.317704    0.299343    10.50000   -1.20000
H8B   2    0.176839    0.252124    0.231693    10.50000   -1.20000
AFIX   0
C9    1   -0.037539    0.377064    0.241292    10.50000    0.23166    0.23116 =
         0.23276    0.00169   -0.00072   -0.00043
AFIX   3
H9A   2   -0.024509    0.366104    0.301952    10.50000   -1.20000
H9B   2   -0.036829    0.446384    0.229692    10.50000   -1.20000
AFIX   0
C10   1   -0.148619    0.334336    0.219703    10.50000    0.23183    0.23108 =
         0.23059    0.00179    0.00000   -0.00226
AFIX   3
H10A  2   -0.204599    0.335116    0.264243    10.50000   -1.20000
H10B  2   -0.137169    0.268116    0.200103    10.50000   -1.20000
AFIX   0
C11   1   -0.267992    0.454697    0.161812    10.50000    0.20881    0.20791 =
         0.20885   -0.00020    0.00167   -0.00024
AFIX   3
H11A  2   -0.330902    0.414897    0.177762    10.50000   -1.20000
H11B  2   -0.248892    0.496427    0.209772    10.50000   -1.20000
AFIX   0
C12   1   -0.299785    0.513102    0.083390    10.50000    0.19683    0.19775 =
         0.19736   -0.00193    0.00032   -0.00019
AFIX   3
H12A  2   -0.370485    0.545732    0.088930    10.50000   -1.20000
H12B  2   -0.300905    0.472642    0.032390    10.50000   -1.20000
AFIX   0
C13   1   -0.221322    0.650019    0.012945    10.50000    0.18729    0.18794 =
         0.18803   -0.00133   -0.00003    0.00117
AFIX   3
H13A  2   -0.224592    0.613679   -0.040365    10.50000   -1.20000
H13B  2   -0.291302    0.683369    0.020325    10.50000   -1.20000
AFIX   0
C14   1   -0.129698    0.724889    0.006302    10.50000    0.18348    0.18211 =
         0.18170   -0.00130   -0.00227    0.00051
AFIX   3
H14A  2   -0.123468    0.760859    0.059642    10.50000   -1.20000
H14B  2   -0.142529    0.770419   -0.040208    10.50000   -1.20000
AFIX   0
C15   1    0.060853    0.737640   -0.009671    10.50000    0.17924    0.17912 =
         0.17862    0.00072   -0.00145   -0.00191
AFIX   3
H15A  2    0.055933    0.781920   -0.057992    10.50000   -1.20000
H15B  2    0.065093    0.774740    0.043188    10.50000   -1.20000
AFIX   0
C16   1    0.158046    0.669036   -0.017131    10.50000    0.19533    0.19458 =
         0.19511    0.00019    0.00001   -0.00021
AFIX   3
H16A  2    0.224306    0.706185   -0.029481    10.50000   -1.20000
H16B  2    0.144676    0.625906   -0.065301    10.50000   -1.20000
AFIX   0
C17   1    0.293571    0.579652    0.055431    10.50000    0.20341    0.20378 =
         0.20330   -0.00011    0.00008   -0.00193
AFIX   3
H17A  2    0.299411    0.532762    0.009141    10.50000   -1.20000
H17B  2    0.349911    0.629432    0.049781    10.50000   -1.20000
AFIX   0
C18   1    0.292196    0.515390    0.134234    10.50000    0.21425    0.21600 =
         0.21509    0.00040    0.00091   -0.00018
AFIX   3
H18A  2    0.256166    0.558820    0.174534    10.50000   -1.20000
H18B  2    0.367356    0.504980    0.153794    10.50000   -1.20000
AFIX   0
O1    4    0.227939    0.423746    0.135553    10.50000    0.22760    0.22843 =
         0.22656    0.00053   -0.00155   -0.00113
O2    4    0.038114    0.316011    0.188304    10.50000    0.22760    0.22843 =
         0.22656    0.00053   -0.00155   -0.00113
O3    4   -0.176511    0.387258    0.140376    10.50000    0.22003    0.21974 =
         0.21966    0.00286    0.00269   -0.00266
O4    4   -0.205694    0.580631    0.083745    10.50000    0.19007    0.19063 =
         0.18958   -0.00519    0.00146   -0.00135
O5    4   -0.030773    0.665847   -0.010443    10.50000    0.17879    0.17678 =
         0.17630   -0.00311    0.00004    0.00029
O6    4    0.175295    0.604354    0.057356    10.50000    0.19744    0.19527 =
         0.19467   -0.00203    0.00133   -0.00018
PART 0
N1    3    0.000000    0.476265    1.052883    10.50000    0.12403    0.10716 =
         0.07348   -0.00711    0.00000    0.00000
AFIX   3
H1A   2    0.070080    0.486735    1.069924    10.50000   -1.50000
H1B   2   -0.036490    0.533545    1.051024    10.50000   -1.50000
H1C   2   -0.033590    0.435895    1.090434    10.50000   -1.50000
AFIX   0
C1    1    0.000000    0.426891    0.968536    10.50000    0.09775    0.09675 =
         0.09679    0.00010    0.00000    0.00000
C2    1   -0.104528    0.406462    0.929445    11.00000    0.13230    0.13134 =
         0.13072   -0.00137    0.00050   -0.00086
AFIX  43
H2A   2   -0.172471    0.425003    0.953611    11.00000   -1.20000
AFIX   0
C3    1   -0.095525    0.356513    0.852252    11.00000    0.18650    0.13633 =
         0.11923   -0.03094   -0.01055   -0.02111
C4    1    0.000000    0.337030    0.811581    10.50000    0.19404    0.12661 =
         0.09686   -0.02137    0.00000    0.00000
F1    5    0.000000    0.291368    0.734430    10.50000    0.23302    0.25184 =
         0.11027   -0.08270    0.00000    0.00000
F2    5   -0.180797    0.322210    0.814659    10.50000    0.19654    0.25857 =
         0.18477   -0.08967   -0.04759   -0.06194

HKLF 4

REM  1 in Cmc2(1)
REM R1 =  0.1896 for    1336 Fo > 4sig(Fo)  and  0.2634 for all    3219 data
REM    244 parameters refined using    326 restraints

END

WGHT      0.2000      0.0000

REM Highest difference peak  0.779,  deepest hole -0.462,  1-sigma level  0.159
Q1    1   0.0000  0.0863  0.9078  10.50000  0.05    0.78
Q2    1   0.0000 -0.0715  0.9042  10.50000  0.05    0.66
Q3    1   0.0000  0.0834  0.8214  10.50000  0.05    0.59
Q4    1   0.2307  0.6261  0.0598  11.00000  0.05    0.59
Q5    1   0.0000 -0.0793  0.8174  10.50000  0.05    0.57
Q6    1   0.0836  0.7029  0.0016  11.00000  0.05    0.52
Q7    1  -0.2164  0.4844  0.1445  11.00000  0.05    0.48
Q8    1  -0.0852  0.2875  0.2099  11.00000  0.05    0.47
Q9    1  -0.2959  0.4608  0.1246  11.00000  0.05    0.47
Q10   1   0.0000  0.0048  0.7606  10.50000  0.05    0.47
Q11   1   0.2066  0.4656  0.1624  11.00000  0.05    0.47
Q12   1   0.0747  0.3740  0.1839  11.00000  0.05    0.44
Q13   1   0.0000  0.7576  0.0185  10.50000  0.05    0.42
Q14   1   0.0000  0.3611  0.1976  10.50000  0.05    0.41
Q15   1   0.0000  0.2222  0.7899  10.50000  0.05    0.35
Q16   1  -0.0628  0.3720  0.9392  11.00000  0.05    0.35
Q17   1   0.0000  0.2430  0.2132  10.50000  0.05    0.35
Q18   1  -0.0438  0.3232  0.8173  11.00000  0.05    0.23
Q19   1  -0.0677  0.4374  0.9037  11.00000  0.05    0.21
Q20   1   0.0000  0.3433  0.7122  10.50000  0.05    0.20
;
_shelx_res_checksum   38686

_shelx_hkl_file
;
   0   0 -14    5.00    0.41
   0   0 -13    0.34    0.29
   0   0 -12    8.34    0.45
   0   0 -11    0.07    0.26
   0   0 -10  109.43    2.67
   0   0  -9    0.07    0.23
   0   0  -8  221.17    5.09
   0   0  -7    0.23    0.17
   0   0  -6  418.17    9.39
   0   0  -5    0.45    0.13
   0   0  -4   55.82    1.33
   0   0  -3    0.11    0.07
   0   0  -2  198.67    4.42
   0   0  -2  197.51    4.43
   0   0   2  201.43    4.50
   0   0   3   -0.01    0.08
   0   0   4   55.71    1.33
   0   0   5    0.49    0.12
   0   0   6  419.95    9.38
   0   0   6  415.98    9.37
   0   0   7   -0.03    0.14
   0   0   7    0.04    0.16
   0   0   8  221.97    5.07
   0   0   8  218.61    5.04
   0   0   9   -0.09    0.22
   0   0   9   -0.13    0.22
   0   0  10  106.93    2.55
   0   0  10  103.46    2.57
   0   0  11    0.22    0.25
   0   0  11    0.20    0.25
   0   0  12    7.12    0.43
   0   0  12    7.86    0.42
   0   0  13    0.26    0.27
   0   0  13    0.25    0.28
   0   0  14    4.59    0.41
   0   0  14    4.25    0.37
   0   0  15   -0.10    0.29
   0   0  15    0.13    0.30
   0   0  16    1.78    0.34
   0   0  16    1.27    0.33
   0   0  17    0.15    0.32
   0   0  18    0.61    0.34
   0   0  19    0.21    0.34
   0   0  20    0.61    0.37
   0  -2 -14    0.95    0.32
   0   2 -14    0.80    0.30
   0  -2 -13    1.22    0.30
   0   2 -13    1.69    0.31
   0  -2 -12   20.09    0.73
   0   2 -12   19.91    0.73
   0  -2 -11    5.24    0.38
   0   2 -11    5.55    0.39
   0  -2 -10  162.21    3.84
   0  -2  -9   48.19    1.28
   0  -2  -9   49.26    1.31
   0  -2  -8    7.85    0.38
   0  -2  -8    8.35    0.37
   0  -2  -7   63.06    1.57
   0  -2  -7   63.06    1.54
   0  -2  -6   69.83    1.70
   0  -2  -6   69.52    1.67
   0  -2  -5  264.21    5.95
   0  -2  -5  264.91    5.98
   0  -2  -4 1947.78   43.23
   0  -2  -4 1957.61   43.25
   0  -2  -3 3175.65   70.35
   0  -2  -3 3182.09   70.33
   0  -2  -2  232.89    5.14
   0  -2  -2  227.89    5.15
   0  -2  -1   18.07    0.47
   0  -2   0 1534.81   33.98
   0  -2   1   17.36    0.46
   0   2   1   17.84    0.46
   0   2   2  232.83    5.22
   0  -2   2  231.55    5.18
   0  -2   3 3176.41   70.28
   0  -2   4 1955.37   43.30
   0   2   4 1954.20   43.28
   0   2   5  264.55    5.97
   0  -2   5  267.13    6.00
   0   2   6   71.41    1.69
   0  -2   6   71.18    1.73
   0   2   7   62.16    1.52
   0  -2   7   62.45    1.55
   0  -2   8    8.48    0.38
   0   2   8    8.40    0.35
   0  -2   8    7.65    0.40
   0  -2   9   48.51    1.30
   0  -2   9   48.66    1.30
   0   2   9   48.21    1.25
   0  -2  10  159.56    3.78
   0  -2  10  159.89    3.77
   0   2  10  158.78    3.72
   0  -2  11    5.24    0.38
   0  -2  11    5.59    0.38
   0   2  11    5.16    0.35
   0  -2  12   21.07    0.74
   0  -2  12   20.13    0.74
   0   2  12   19.77    0.68
   0  -2  13    1.37    0.30
   0   2  13    1.31    0.28
   0  -2  13    1.55    0.31
   0  -2  14    1.05    0.32
   0   2  14    0.74    0.28
   0  -2  14    0.83    0.31
   0  -2  15    0.06    0.29
   0  -2  15    0.32    0.30
   0   2  15    0.18    0.28
   0  -2  16    0.61    0.32
   0   2  16    0.82    0.30
   0  -2  17    0.46    0.34
   0  -2  18    0.13    0.33
   0  -2  19    0.23    0.34
   0   2  19    0.52    0.36
   0   4 -14    0.68    0.31
   0  -4 -14    0.31    0.31
   0   4 -13    1.45    0.31
   0  -4 -13    1.91    0.33
   0   4 -12    2.18    0.32
   0  -4 -12    1.66    0.29
   0  -4 -12    1.59    0.31
   0  -4 -11    0.68    0.25
   0   4 -11    0.84    0.27
   0  -4 -11    0.75    0.28
   0   4 -10   28.84    0.88
   0  -4 -10   27.58    0.88
   0  -4 -10   27.93    0.84
   0  -4  -9   11.62    0.48
   0  -4  -9   10.25    0.45
   0   4  -9   10.46    0.47
   0  -4  -8   74.17    1.82
   0   4  -8   73.96    1.85
   0  -4  -8   73.91    1.85
   0  -4  -7   17.09    0.54
   0  -4  -7   17.43    0.57
   0   4  -7   15.84    0.56
   0  -4  -6   15.63    0.50
   0   4  -6   16.53    0.53
   0  -4  -6   16.38    0.53
   0  -4  -5  180.43    4.14
   0   4  -5  179.48    4.14
   0  -4  -5  183.43    4.12
   0   4  -4    3.65    0.19
   0  -4  -4    3.73    0.18
   0  -4  -4    4.13    0.20
   0   4  -3  546.53   12.17
   0  -4  -3  547.67   12.18
   0  -4  -3  547.98   12.18
   0   4  -2   32.13    0.76
   0  -4  -2   30.88    0.76
   0  -4  -1  231.24    5.23
   0  -4   0   68.12    1.63
   0  -4   1  235.72    5.34
   0  -4   2   33.52    0.88
   0   4   2   34.80    0.89
   0   4   2   33.27    0.78
   0  -4   2   32.00    0.78
   0   4   3  543.01   12.21
   0   4   3  553.87   12.30
   0  -4   3  552.91   12.21
   0   4   4    3.73    0.19
   0   4   4    3.61    0.30
   0  -4   4    3.93    0.19
   0   4   5  188.32    4.19
   0  -4   5  190.58    4.19
   0  -4   6   17.58    0.54
   0   4   6   16.58    0.50
   0   4   6   16.76    0.54
   0   4   7   16.95    0.56
   0   4   7   16.28    0.51
   0  -4   7   16.68    0.55
   0   4   8   73.41    1.84
   0  -4   8   74.05    1.84
   0   4   8   73.67    1.78
   0   4   9    9.09    0.39
   0   4   9    9.83    0.44
   0  -4   9   10.16    0.45
   0  -4  10   27.25    0.90
   0   4  10   27.14    0.80
   0  -4  10   27.77    0.87
   0   4  10   28.81    0.87
   0  -4  11    0.97    0.26
   0  -4  11    0.29    0.28
   0   4  11    0.93    0.26
   0   4  11    0.94    0.24
   0   4  12    1.77    0.29
   0   4  12    1.95    0.27
   0  -4  12    1.73    0.31
   0  -4  12    1.42    0.32
   0   4  13    1.82    0.28
   0   4  13    1.48    0.30
   0  -4  13    1.73    0.32
   0  -4  13    1.77    0.35
   0  -4  14    0.34    0.32
   0  -4  14    0.58    0.30
   0   4  14    1.03    0.28
   0   4  14    0.65    0.30
   0  -4  15    0.67    0.32
   0   4  15    0.89    0.28
   0   4  15    0.99    0.33
   0   4  16    0.44    0.32
   0  -4  16    0.25    0.31
   0   4  16    0.69    0.29
   0   4  17   -0.06    0.31
   0  -4  17    0.80    0.34
   0  -4  18    0.54    0.36
   0   4  18    0.81    0.38
   0  -4  19    0.33    0.38
   0   4  19    0.07    0.36
   0   6 -14    0.92    0.34
   0  -6 -14    0.69    0.33
   0  -6 -13    3.19    0.39
   0  -6 -13    2.94    0.38
   0   6 -13    4.07    0.41
   0  -6 -12    1.88    0.32
   0   6 -12    2.09    0.33
   0  -6 -12    2.80    0.35
   0  -6 -11    0.98    0.29
   0   6 -11    1.36    0.29
   0  -6 -11    1.21    0.29
   0   6 -10    0.38    0.25
   0  -6 -10    0.32    0.24
   0  -6 -10    0.77    0.25
   0   6  -9   11.18    0.48
   0  -6  -9   10.98    0.48
   0  -6  -9   10.48    0.46
   0   6  -8   11.40    0.46
   0  -6  -8   11.40    0.45
   0  -6  -8   11.64    0.47
   0  -6  -7   13.60    0.49
   0   6  -7   12.89    0.56
   0   6  -7   13.88    0.49
   0  -6  -7   13.36    0.47
   0  -6  -6   39.27    1.02
   0   6  -6   38.41    1.01
   0   6  -6   38.33    1.09
   0  -6  -6   38.32    1.01
   0  -6  -5    8.62    0.33
   0  -6  -5    7.45    0.31
   0   6  -5    7.76    0.32
   0   6  -5    8.26    0.44
   0   6  -4   20.96    0.67
   0   6  -4   19.33    0.54
   0  -6  -4   19.09    0.55
   0  -6  -4   19.30    0.54
   0   6  -3   31.15    0.89
   0  -6  -3   30.54    0.91
   0  -6  -2   21.20    0.68
   0  -6  -1    1.66    0.25
   0  -6   0    3.68    0.30
   0  -6   0    4.15    0.32
   0  -6   1    1.99    0.29
   0  -6   2   22.38    0.72
   0   6   3   28.84    0.87
   0   6   3   29.50    0.73
   0  -6   3   29.52    0.72
   0  -6   4   19.79    0.55
   0   6   4   20.29    0.70
   0   6   4   21.03    0.56
   0   6   5    8.81    0.49
   0   6   5    9.05    0.34
   0  -6   5    8.02    0.33
   0   6   6   41.06    1.17
   0  -6   6   38.73    1.03
   0   6   6   40.22    1.04
   0   6   7   14.33    0.63
   0   6   7   13.31    0.48
   0  -6   7   14.00    0.49
   0  -6   8   12.14    0.46
   0   6   8   12.08    0.46
   0   6   8   11.90    0.61
   0   6   9   10.02    0.40
   0  -6   9   10.36    0.45
   0   6   9   10.96    0.62
   0   6   9   10.56    0.46
   0  -6  10    0.32    0.22
   0   6  10    0.37    0.19
   0   6  10    0.85    0.24
   0  -6  11    1.28    0.27
   0   6  11    0.97    0.22
   0   6  11    1.35    0.28
   0   6  12    2.19    0.31
   0  -6  12    2.25    0.38
   0   6  12    2.06    0.27
   0  -6  12    1.21    0.30
   0   6  13    2.69    0.35
   0  -6  13    2.49    0.36
   0   6  13    2.64    0.30
   0   6  14    0.62    0.31
   0   6  14    0.55    0.26
   0  -6  14    0.15    0.30
   0  -6  15   -0.06    0.30
   0   6  15    0.18    0.27
   0   6  15    0.08    0.29
   0   6  16    0.13    0.29
   0   6  16    1.14    0.35
   0  -6  16    0.48    0.33
   0   6  17    0.06    0.33
   0  -6  17    0.04    0.33
   0   6  18   -0.14    0.35
   0  -6  18   -0.14    0.36
   0  -6  19    0.80    0.42
   0   6  19    0.42    0.38
   0  -8 -16    0.04    0.38
   0  -8 -15   -0.21    0.35
   0  -8 -14    0.64    0.35
   0  -8 -13    0.19    0.32
   0  -8 -12    2.31    0.36
   0   8 -12    2.09    0.47
   0  -8 -11    1.79    0.33
   0   8 -11    1.05    0.43
   0  -8 -10    2.82    0.34
   0   8 -10    3.61    0.45
   0   8  -9    0.25    0.37
   0  -8  -9    0.50    0.24
   0  -8  -9    0.51    0.25
   0  -8  -8    1.13    0.24
   0   8  -8    0.61    0.35
   0  -8  -7    2.96    0.26
   0   8  -7    2.45    0.37
   0   8  -6    6.23    0.44
   0  -8  -6    4.47    0.28
   0  -8  -5   14.04    0.48
   0   8  -5   16.75    0.63
   0  -8  -4    7.82    0.46
   0   8  -4    7.97    0.45
   0   8  -3    4.25    0.38
   0  -8  -3    6.08    0.41
   0  -8  -2    0.42    0.28
   0  -8  -1    1.90    0.36
   0  -8  -1    1.25    0.29
   0  -8   0    1.34    0.34
   0  -8   0    1.15    0.33
   0  -8   1    1.43    0.35
   0  -8   2    0.42    0.32
   0  -8   3    5.94    0.45
   0   8   4    7.45    0.47
   0   8   5   15.97    0.67
   0   8   6    5.80    0.46
   0  -8   6    5.33    0.27
   0   8   6    5.36    0.28
   0   8   7    2.84    0.24
   0   8   7    2.88    0.42
   0  -8   7    2.82    0.23
   0   8   8    0.78    0.41
   0   8   8    1.06    0.22
   0  -8   8    0.81    0.21
   0   8   9    0.90    0.24
   0   8   9    0.87    0.45
   0  -8   9    0.61    0.22
   0  -8  10    2.95    0.30
   0   8  10    3.15    0.52
   0   8  10    3.02    0.31
   0   8  11    1.07    0.27
   0  -8  11    1.12    0.28
   0   8  11    1.68    0.51
   0   8  12    1.89    0.31
   0  -8  12    1.91    0.32
   0  -8  13    0.38    0.28
   0   8  13    0.16    0.53
   0   8  13   -0.02    0.26
   0   8  14    1.04    0.56
   0  -8  14    0.46    0.29
   0   8  14    0.48    0.29
   0  -8  15    0.17    0.31
   0   8  15   -0.24    0.56
   0   8  15    0.52    0.31
   0   8  16    0.31    0.59
   0  -8  16    0.55    0.34
   0   8  16   -0.03    0.29
   0   8  16    0.10    0.32
   0   8  17    0.73    0.64
   0 -10 -16    0.02    0.39
   0 -10 -15   -0.13    0.39
   0 -10 -14    0.06    0.35
   0 -10 -13    0.44    0.34
   0 -10 -12    0.50    0.32
   0 -10 -11    0.39    0.32
   0  10 -10    1.12    0.43
   0 -10 -10    0.56    0.29
   0  10  -9    0.74    0.41
   0 -10  -9    0.20    0.25
   0 -10  -8    0.82    0.25
   0  10  -8    0.44    0.38
   0 -10  -7    0.54    0.23
   0  10  -7    1.85    0.40
   0  10  -6    1.39    0.38
   0 -10  -6    0.69    0.22
   0 -10  -5   -0.01    0.19
   0  10  -5    0.18    0.36
   0 -10  -4    0.88    0.21
   0  10  -4    1.14    0.36
   0 -10  -3    2.82    0.42
   0 -10  -3    3.10    0.42
   0 -10  -2    1.93    0.43
   0 -10  -2    1.75    0.38
   0 -10  -1    1.10    0.40
   0 -10  -1    1.58    0.42
   0 -10   0    0.84    0.41
   0 -10   0    1.77    0.44
   0 -10   1    2.19    0.46
   0 -10   1    2.21    0.44
   0 -10   2    2.10    0.45
   0 -10   3    3.22    0.46
   0  10   6    0.96    0.41
   0  10   7    0.54    0.41
   0  10   8    0.64    0.45
   0  10   9   -0.08    0.44
   0  10  10    1.25    0.50
   0  10  11    0.85    0.51
   0  10  12    0.38    0.51
   0  10  13    0.48    0.51
   0  10  14    0.88    0.55
   0  10  15    0.30    0.59
   0  10  16    0.22    0.61
   0 -12 -14    0.09    0.37
   0 -12 -13   -0.04    0.36
   0 -12 -12   -0.08    0.33
   0 -12 -11    0.40    0.33
   0 -12 -10    0.41    0.30
   0 -12  -9    0.69    0.29
   0 -12  -8    0.15    0.25
   0 -12  -7    0.24    0.24
   0  12  -7    0.51    0.41
   0  12  -6    1.80    0.43
   0 -12  -6    0.57    0.24
   0 -12  -5    0.13    0.23
   0 -12  -4    0.64    0.44
   0 -12  -4    0.77    0.40
   0 -12  -4   -0.11    0.23
   0 -12  -3    1.95    0.49
   0 -12  -3    0.98    0.46
   0 -12  -2    1.44    0.46
   0 -12  -2    1.98    0.51
   0 -12  -1    0.53    0.47
   0 -12  -1    0.70    0.51
   0 -12   0    1.90    0.57
   0 -12   0    2.84    0.55
   0 -12   1    0.06    0.50
   0 -12   1    1.87    0.55
   0 -12   2    1.18    0.52
   0 -12   2    1.58    0.53
   0 -12   3    1.20    0.49
   0  12   8    1.12    0.47
   0  12   9    1.50    0.49
   0  12  10    0.47    0.48
   0  12  11    0.18    0.53
   0  12  12    0.49    0.54
   0  12  13   -0.69    0.55
   0  12  14    0.33    0.59
   0 -14 -11   -0.28    0.32
   0 -14 -10    0.04    0.30
   0 -14  -9    0.33    0.28
   0 -14  -8    0.71    0.28
   0 -14  -7    0.37    0.26
   0 -14  -6    0.45    0.30
   0 -14  -6    0.31    0.26
   0 -14  -5    0.40    0.35
   0 -14  -5    0.23    0.26
   0 -14  -4    0.39    0.42
   0 -14  -4    0.17    0.25
   0 -14  -3    0.22    0.49
   0 -14  -2    0.85    0.55
   0 -14  -1   -0.76    0.59
   0 -14   0    0.52    0.59
   0 -14   1    0.80    0.57
   0 -14   2    0.43    0.57
   0 -14   3    0.85    0.57
   0  14  12    0.06    0.55
   0 -16  -8    0.30    0.31
   0 -16  -8    0.04    0.26
   0 -16  -7    0.01    0.30
   0 -16  -7   -0.18    0.28
   0 -16  -6    0.25    0.29
   0 -16  -6    0.05    0.32
   0 -16  -5    0.24    0.38
   0 -16  -5    0.17    0.30
   0 -16  -4   -0.08    0.30
   0 -16  -4   -0.17    0.45
   0 -16  -3    0.47    0.53
   0 -16  -3    0.33    0.32
   0 -16  -2    0.09    0.60
   0 -16  -1    0.03    0.61
   0 -16   0    0.69    0.67
   0 -16   1    0.31    0.65
   0 -16   2    0.65    0.63
   0 -18  -4    0.17    0.39
   0 -18  -3    0.22    0.37
   0 -18  -2   -0.06    0.65
   0 -18  -1   -0.10    0.70
   0 -18   0   -0.32    0.76
   0 -18   1   -0.71    0.76
  -1  -1 -14    2.76    0.35
   1  -1 -14    2.71    0.36
   1  -1 -13    1.44    0.32
  -1  -1 -13    0.85    0.29
  -1  -1 -12   24.82    0.83
   1  -1 -12   24.95    0.85
  -1  -1 -11    0.56    0.26
   1  -1 -11    1.21    0.29
  -1  -1 -10   60.65    1.56
   1  -1 -10   58.30    1.55
  -1  -1 -10   57.27    1.54
   1  -1  -9   25.06    0.80
  -1  -1  -9   25.45    0.78
  -1  -1  -9   25.47    0.78
  -1  -1  -8  165.04    3.86
  -1  -1  -8  163.38    3.85
   1  -1  -8  168.19    3.87
   1  -1  -7   26.93    0.78
  -1  -1  -7   26.52    0.77
  -1  -1  -7   27.99    0.77
  -1  -1  -6   21.26    0.61
   1  -1  -6   21.54    0.63
  -1  -1  -6   20.89    0.62
  -1  -1  -5    8.93    0.32
   1  -1  -5    9.08    0.33
  -1  -1  -5    9.38    0.32
  -1  -1  -4  740.60   16.43
  -1  -1  -4  734.27   16.43
   1  -1  -4  742.03   16.44
  -1  -1  -3 1479.52   32.67
  -1  -1  -3 1469.48   32.66
  -1  -1  -2 1521.43   33.77
  -1  -1  -2 1528.55   33.76
  -1  -1  -1   18.35    0.45
   1   1   1   18.49    0.43
   1  -1   1   17.91    0.44
  -1   1   1   17.09    0.44
   1  -1   2 1516.87   33.59
  -1  -1   3 1483.74   32.31
   1  -1   3 1479.22   32.30
  -1   1   3 1434.20   32.27
   1  -1   3 1454.69   32.31
   1  -1   4  732.45   16.50
   1  -1   4  745.32   16.50
  -1   1   4  745.14   16.46
  -1  -1   4  742.57   16.50
  -1  -1   5    9.30    0.33
   1  -1   5    9.59    0.33
  -1   1   5    9.70    0.30
   1  -1   6   21.15    0.61
  -1   1   6   20.91    0.58
   1   1   6   19.88    0.60
   1  -1   7   26.56    0.78
  -1   1   7   27.40    0.74
   1   1   7   27.84    0.76
  -1  -1   7   28.31    0.78
   1  -1   8  164.57    3.83
  -1  -1   8  167.59    3.82
   1   1   8  167.09    3.81
   1  -1   8  159.19    3.82
  -1   1   8  164.59    3.78
  -1  -1   8  161.31    3.83
   1   1   9   25.25    0.77
   1  -1   9   26.24    0.80
  -1  -1   9   25.21    0.79
  -1   1   9   26.18    0.75
  -1  -1   9   26.28    0.78
   1  -1   9   24.92    0.78
   1   1  10   57.74    1.50
   1  -1  10   57.61    1.51
  -1   1  10   59.77    1.48
  -1  -1  10   56.74    1.54
   1  -1  10   56.58    1.53
  -1  -1  10   57.73    1.50
  -1  -1  11    1.11    0.26
   1  -1  11    0.94    0.27
   1  -1  11    0.63    0.27
   1   1  11    0.89    0.26
  -1  -1  11    0.62    0.25
  -1   1  11    1.06    0.25
   1  -1  12   24.15    0.83
   1  -1  12   23.92    0.81
  -1   1  12   25.26    0.78
  -1  -1  12   25.14    0.80
   1   1  12   23.82    0.79
  -1  -1  12   23.75    0.83
   1  -1  13    1.71    0.32
   1  -1  13    1.51    0.32
  -1  -1  13    1.84    0.31
  -1  -1  13    1.70    0.31
   1   1  13    1.36    0.30
  -1   1  13    1.70    0.28
   1  -1  14    2.04    0.33
  -1   1  14    2.07    0.31
   1  -1  14    2.18    0.35
  -1  -1  14    2.27    0.35
   1   1  14    2.78    0.33
  -1  -1  14    2.87    0.33
  -1   1  15    0.56    0.28
   1  -1  15   -0.20    0.30
  -1  -1  15    0.42    0.30
   1   1  15    0.26    0.29
  -1  -1  15    0.37    0.29
   1  -1  15    0.19    0.28
   1  -1  16    0.20    0.31
  -1  -1  16    0.18    0.30
  -1  -1  16    0.39    0.31
  -1   1  16    0.29    0.28
  -1  -1  17    0.30    0.33
   1  -1  17    0.69    0.33
   1  -1  18    0.60    0.33
  -1  -1  18    0.52    0.34
  -1  -1  19    0.54    0.37
  -1  -3 -14    4.40    0.40
  -1   3 -14    4.04    0.39
  -1  -3 -13    0.51    0.29
  -1   3 -13    0.58    0.27
   1  -3 -13    0.42    0.30
  -1  -3 -13    0.71    0.30
  -1   3 -12    4.55    0.36
  -1  -3 -12    4.40    0.37
  -1  -3 -12    4.24    0.37
   1   3 -12    5.18    0.40
   1  -3 -12    4.47    0.38
  -1  -3 -11    3.77    0.35
   1  -3 -11    4.65    0.38
  -1   3 -11    4.30    0.36
   1   3 -11    5.05    0.39
  -1  -3 -11    4.84    0.37
  -1  -3 -10    5.22    0.36
  -1  -3 -10    5.08    0.36
   1  -3 -10    5.03    0.37
  -1   3 -10    5.22    0.36
   1   3 -10    5.10    0.37
   1  -3  -9    2.12    0.24
  -1   3  -9    1.84    0.28
   1   3  -9    1.72    0.28
  -1  -3  -9    1.70    0.27
  -1  -3  -9    1.80    0.28
   1  -3  -9    1.44    0.27
   1  -3  -8  138.32    3.34
  -1  -3  -8  141.94    3.34
   1  -3  -8  146.04    3.29
  -1   3  -8  142.20    3.33
   1   3  -8  140.98    3.35
  -1  -3  -8  138.62    3.32
   1  -3  -7    7.52    0.37
  -1  -3  -7    7.38    0.36
   1  -3  -7    9.05    0.33
  -1   3  -7    7.88    0.36
  -1  -3  -7    8.34    0.36
   1   3  -7    8.29    0.38
   1  -3  -6   99.32    2.38
   1  -3  -6   99.87    2.32
   1   3  -6  101.92    2.38
  -1  -3  -6  100.10    2.37
  -1  -3  -6  100.76    2.37
  -1   3  -6   99.91    2.36
  -1  -3  -5    2.83    0.20
  -1  -3  -5    2.54    0.18
  -1   3  -5    2.69    0.18
   1  -3  -5    2.48    0.19
   1  -3  -5    2.37    0.15
  -1  -3  -4   60.48    1.44
  -1  -3  -4   59.66    1.44
  -1   3  -4   61.00    1.44
   1  -3  -4   60.56    1.40
   1  -3  -3  144.09    3.19
  -1  -3  -3  139.03    3.23
  -1   3  -3  143.38    3.22
  -1  -3  -3  141.50    3.23
  -1  -3  -2  622.44   13.74
  -1   3  -2  617.93   13.68
  -1  -3  -2  611.37   13.69
  -1  -3  -2  617.45   13.71
  -1   3  -1  553.40   12.34
  -1  -3  -1  554.44   12.34
   1  -3   0 4204.25   93.05
  -1   3   0 4206.18   93.04
   1  -3   1  551.57   12.25
  -1  -3   1  548.12   12.22
  -1   3   1  547.81   12.23
  -1   3   2  617.76   13.69
  -1   3   2  612.17   13.64
  -1   3   3  145.60    3.34
  -1   3   3  146.40    3.28
  -1  -3   3  142.21    3.28
   1   3   4   61.87    1.48
  -1  -3   4   62.32    1.49
   1  -3   4   62.66    1.48
  -1   3   4   61.39    1.44
  -1   3   4   63.94    1.49
   1   3   4   63.37    1.48
   1   3   5    2.30    0.17
  -1   3   5    2.31    0.14
   1   3   5    2.41    0.17
   1  -3   5    2.69    0.18
  -1  -3   5    2.52    0.18
  -1   3   5    2.71    0.18
  -1   3   6   99.75    2.34
  -1  -3   6   97.83    2.34
   1  -3   6  102.44    2.35
   1   3   6  101.18    2.35
  -1   3   6   99.46    2.28
   1   3   6   94.37    2.31
  -1  -3   7    7.95    0.36
   1  -3   7    8.43    0.37
  -1   3   7    8.21    0.36
  -1   3   7    8.93    0.32
   1   3   7    7.83    0.34
   1   3   7    7.60    0.36
  -1   3   8  137.49    3.28
  -1   3   8  140.69    3.21
   1   3   8  140.27    3.29
   1   3   8  136.70    3.24
  -1  -3   8  139.08    3.28
   1  -3   8  139.39    3.29
   1   3   9    1.63    0.26
  -1   3   9    1.99    0.28
  -1  -3   9    1.55    0.27
   1   3   9    1.87    0.27
  -1   3   9    2.27    0.23
   1  -3   9    1.44    0.27
  -1  -3  10    4.29    0.34
   1   3  10    4.56    0.33
   1  -3  10    4.15    0.36
   1  -3  10    4.75    0.35
  -1   3  10    4.81    0.30
  -1   3  10    4.92    0.34
   1   3  10    5.50    0.36
   1   3  11    3.83    0.32
  -1  -3  11    4.35    0.36
   1  -3  11    4.14    0.36
   1  -3  11    5.30    0.38
  -1   3  11    4.07    0.34
   1   3  11    4.31    0.36
  -1   3  11    4.02    0.30
  -1  -3  11    3.74    0.35
  -1   3  12    4.30    0.31
  -1  -3  12    4.35    0.36
   1  -3  12    3.50    0.34
   1  -3  12    4.50    0.38
  -1   3  12    4.14    0.36
   1   3  12    4.36    0.37
  -1  -3  12    3.68    0.37
   1   3  12    3.97    0.34
   1  -3  13    0.63    0.31
  -1   3  13    0.91    0.25
   1  -3  13    0.62    0.28
  -1  -3  13    0.62    0.27
   1   3  13    0.53    0.28
  -1  -3  13    0.73    0.32
  -1   3  13    0.61    0.28
   1   3  13    0.20    0.26
   1  -3  14    5.09    0.43
  -1   3  14    3.29    0.38
   1   3  14    4.01    0.39
  -1  -3  14    3.88    0.39
  -1   3  14    3.67    0.33
   1  -3  14    4.00    0.40
   1   3  14    3.74    0.35
  -1  -3  14    4.14    0.39
   1  -3  15    0.37    0.30
   1   3  15    0.13    0.29
   1   3  15    0.47    0.29
  -1   3  15    0.46    0.31
  -1   3  15    0.11    0.27
  -1  -3  15    0.21    0.30
  -1  -3  15    0.47    0.32
  -1   3  16    0.16    0.30
   1   3  16    0.20    0.31
   1  -3  16    0.14    0.30
  -1  -3  16    0.12    0.30
   1   3  16    0.65    0.30
  -1   3  16    0.48    0.28
  -1   3  17    0.09    0.31
   1   3  17    0.02    0.32
  -1   3  17    0.14    0.29
  -1  -3  17    0.68    0.33
   1  -3  17    0.72    0.35
   1   3  18    0.31    0.33
  -1  -3  18    0.65    0.36
  -1   3  18    0.53    0.34
   1  -3  18    0.64    0.34
  -1   3  19    0.45    0.38
  -1  -3  19    0.69    0.38
  -1  -5 -15   -0.10    0.34
  -1  -5 -14    0.66    0.34
  -1   5 -14    0.56    0.32
  -1  -5 -14    0.26    0.32
  -1   5 -13    0.97    0.32
  -1  -5 -13    1.11    0.34
  -1  -5 -13    0.56    0.31
   1  -5 -12    5.83    0.39
  -1  -5 -12    6.74    0.43
  -1   5 -12    6.79    0.43
  -1  -5 -12    6.60    0.43
  -1   5 -11    1.65    0.30
  -1  -5 -11    1.93    0.30
   1  -5 -11    2.00    0.28
  -1  -5 -11    1.59    0.29
  -1  -5 -10   17.86    0.65
  -1   5 -10   18.57    0.66
  -1  -5 -10   17.30    0.64
   1  -5 -10   17.52    0.61
  -1  -5  -9    6.61    0.39
   1  -5  -9    7.60    0.36
  -1  -5  -9    8.16    0.41
  -1   5  -9    7.88    0.41
   1  -5  -8    2.76    0.24
  -1  -5  -8    2.68    0.28
  -1   5  -8    2.58    0.27
  -1  -5  -8    2.71    0.28
  -1  -5  -7   18.28    0.60
  -1  -5  -7   19.18    0.61
  -1   5  -7   18.85    0.61
   1  -5  -7   18.48    0.56
  -1  -5  -6   26.35    0.77
  -1   5  -6   28.35    0.78
   1  -5  -6   26.89    0.73
  -1  -5  -6   28.90    0.78
  -1   5  -5   16.01    0.49
   1   5  -5   16.51    0.57
  -1  -5  -5   16.43    0.50
   1  -5  -5   16.44    0.46
  -1  -5  -5   15.02    0.49
   1   5  -4   57.46    1.47
  -1   5  -4   58.60    1.41
   1  -5  -4   58.40    1.38
  -1  -5  -4   59.76    1.41
  -1  -5  -4   59.08    1.43
  -1   5  -3   79.07    1.84
   1   5  -3   81.70    1.91
  -1  -5  -3   81.74    1.95
  -1  -5  -3   78.36    1.84
  -1  -5  -3   78.07    1.87
  -1  -5  -2   38.27    0.92
  -1   5  -2   37.49    0.92
   1  -5  -1    4.24    0.29
  -1   5  -1    3.69    0.12
  -1  -5  -1    4.44    0.27
  -1  -5  -1    3.67    0.13
   1  -5   0   45.35    1.17
  -1  -5   0   45.11    1.16
   1  -5   1    4.26    0.29
  -1   5   1    3.65    0.13
  -1  -5   1    4.66    0.27
  -1   5   2   38.66    0.94
  -1  -5   2   38.95    0.94
   1  -5   2   42.40    1.09
  -1   5   2   41.80    1.06
  -1  -5   2   41.86    1.05
  -1   5   3   80.83    1.93
  -1   5   3   77.63    1.82
  -1  -5   3   78.67    1.82
  -1   5   4   60.53    1.44
  -1   5   4   60.98    1.56
  -1  -5   4   60.01    1.44
  -1   5   5   16.41    0.51
  -1  -5   5   17.29    0.51
  -1   5   5   17.11    0.65
  -1  -5   6   26.94    0.75
   1  -5   6   26.78    0.75
   1   5   6   26.94    0.75
   1   5   6   24.90    0.73
  -1   5   6   26.48    0.75
   1  -5   7   18.08    0.58
   1   5   7   17.31    0.56
   1   5   7   18.85    0.59
  -1  -5   7   18.72    0.59
  -1   5   7   18.78    0.59
  -1   5   7   16.59    0.51
   1  -5   8    2.09    0.25
  -1   5   8    2.59    0.20
   1   5   8    2.49    0.24
   1   5   8    2.88    0.26
  -1  -5   8    2.79    0.26
  -1   5   8    2.77    0.26
   1   5   9    7.18    0.38
   1  -5   9    7.21    0.38
   1   5   9    6.84    0.35
  -1   5   9    7.32    0.32
  -1   5   9    7.32    0.38
  -1  -5   9    7.61    0.39
   1   5  10   15.69    0.57
  -1  -5  10   17.29    0.63
  -1   5  10   17.33    0.55
   1  -5  10   17.33    0.63
   1   5  10   16.89    0.63
  -1   5  10   17.56    0.63
   1   5  11    1.30    0.25
   1   5  11    1.43    0.29
   1  -5  11    1.43    0.27
  -1   5  11    1.53    0.23
  -1   5  11    1.44    0.27
  -1  -5  11    1.09    0.28
   1   5  12    5.81    0.41
  -1   5  12    5.50    0.40
  -1  -5  12    5.60    0.40
   1   5  12    5.85    0.37
   1  -5  12    5.91    0.46
  -1   5  12    6.26    0.34
   1  -5  12    5.13    0.39
   1  -5  13    1.10    0.34
   1   5  13    0.70    0.29
  -1  -5  13    0.70    0.30
  -1   5  13    0.81    0.29
   1   5  13    0.51    0.26
  -1  -5  13    0.79    0.34
  -1   5  13    0.59    0.24
   1  -5  13    0.53    0.28
   1  -5  14    0.25    0.29
  -1   5  14    0.34    0.26
  -1  -5  14    0.06    0.29
   1   5  14    0.19    0.27
   1   5  14    0.67    0.30
  -1   5  14    0.52    0.31
  -1  -5  15   -0.12    0.29
  -1   5  15   -0.05    0.26
  -1   5  15    0.35    0.30
   1   5  15   -0.11    0.30
   1   5  15    0.01    0.28
   1  -5  15    0.52    0.31
  -1   5  16   -0.03    0.27
  -1   5  16    0.39    0.33
   1   5  16    0.04    0.30
   1  -5  16   -0.08    0.31
   1   5  16    0.01    0.29
  -1  -5  16    0.17    0.34
  -1  -5  17    0.09    0.33
  -1   5  17    0.20    0.29
  -1   5  17    0.37    0.35
  -1   5  18    0.54    0.38
  -1  -5  18    0.94    0.40
  -1   5  19    0.02    0.38
  -1  -5  19    0.96    0.41
  -1  -7 -16    0.20    0.38
  -1  -7 -15   -0.33    0.36
  -1  -7 -14    0.57    0.35
   1  -7 -14    0.09    0.29
   1  -7 -13    0.47    0.29
  -1  -7 -13    0.25    0.30
  -1   7 -13    0.26    0.31
  -1  -7 -13    0.34    0.32
  -1  -7 -12   -0.05    0.28
  -1   7 -12   -0.05    0.29
   1  -7 -12    0.25    0.27
  -1  -7 -12    0.10    0.31
   1  -7 -11    1.35    0.28
  -1   7 -11    1.05    0.29
  -1  -7 -11    1.09    0.31
  -1  -7 -11    1.10    0.29
  -1   7 -10    1.35    0.29
  -1  -7 -10    0.75    0.28
  -1  -7 -10    1.02    0.26
   1  -7 -10    1.40    0.26
   1  -7  -9    0.01    0.22
  -1  -7  -9    0.40    0.23
  -1   7  -9    0.54    0.24
  -1  -7  -9    0.37    0.24
  -1   7  -9    0.07    0.36
   1   7  -9    0.20    0.32
  -1   7  -8   11.59    0.57
  -1  -7  -8   10.44    0.47
   1  -7  -8   11.72    0.45
   1   7  -8   11.67    0.56
  -1   7  -8   12.48    0.48
  -1  -7  -8   11.89    0.47
   1   7  -7    3.33    0.36
  -1  -7  -7    3.02    0.27
   1  -7  -7    3.08    0.24
  -1  -7  -7    3.08    0.25
  -1   7  -7    3.11    0.26
  -1   7  -7    3.23    0.40
   1   7  -6    2.92    0.35
  -1   7  -6    2.34    0.38
  -1  -7  -6    2.68    0.23
   1  -7  -6    2.38    0.21
  -1   7  -6    2.78    0.23
  -1  -7  -6    1.89    0.23
   1   7  -5   33.84    0.93
   1  -7  -5   28.49    0.79
  -1   7  -5   31.16    0.81
  -1  -7  -5   28.47    0.83
  -1  -7  -5   30.63    0.81
  -1   7  -5   33.68    0.96
   1  -7  -4   19.89    0.58
   1   7  -4   22.17    0.70
  -1  -7  -4   21.31    0.58
  -1  -7  -4   21.19    0.63
  -1   7  -4   21.85    0.58
  -1  -7  -3   29.69    0.83
  -1   7  -3   23.48    0.63
  -1  -7  -3   23.95    0.63
   1   7  -3   27.31    0.78
  -1  -7  -2    3.00    0.14
  -1   7  -2    2.82    0.13
   1  -7  -1    3.13    0.35
  -1  -7  -1    3.01    0.32
   1  -7   0    0.93    0.31
  -1  -7   0    0.61    0.27
  -1  -7   0    0.54    0.28
  -1  -7   1    2.79    0.33
   1  -7   1    2.33    0.33
   1  -7   2    4.05    0.38
  -1  -7   2    4.07    0.36
  -1   7   2    3.07    0.14
  -1  -7   3   23.00    0.62
  -1   7   3   23.22    0.62
  -1   7   3   26.67    0.81
  -1  -7   3   29.11    0.81
   1  -7   3   28.25    0.83
  -1   7   4   22.21    0.61
  -1   7   4   24.01    0.79
  -1  -7   4   23.17    0.62
  -1   7   5   31.98    0.84
  -1   7   5   33.92    1.01
  -1  -7   5   31.38    0.84
  -1   7   6    3.02    0.40
  -1   7   6    2.88    0.23
  -1  -7   6    2.15    0.22
  -1  -7   7    3.42    0.26
  -1   7   7    3.27    0.25
  -1   7   7    3.06    0.42
  -1   7   8   12.17    0.63
  -1  -7   8   11.69    0.47
  -1   7   8   11.33    0.46
  -1   7   9    0.48    0.22
  -1  -7   9    0.07    0.20
  -1   7   9    0.48    0.41
   1   7  10    1.37    0.25
   1   7  10    1.09    0.23
   1  -7  10    1.66    0.26
  -1   7  10    2.10    0.48
  -1  -7  10    1.80    0.28
  -1   7  10    1.36    0.26
  -1  -7  11    0.92    0.28
   1   7  11    1.44    0.28
   1  -7  11    1.37    0.28
   1   7  11    0.74    0.23
  -1   7  11    0.86    0.26
  -1   7  12    0.11    0.26
  -1   7  12    0.58    0.50
   1   7  12    0.11    0.24
  -1  -7  12    0.11    0.27
  -1   7  12    0.29    0.21
  -1   7  13    0.91    0.30
  -1   7  13    0.52    0.23
   1   7  13    0.57    0.26
  -1  -7  13    0.74    0.30
  -1   7  13    0.55    0.50
   1   7  14    0.17    0.26
  -1   7  14    0.46    0.28
  -1  -7  14    0.23    0.32
  -1   7  14    0.31    0.24
  -1  -7  15    0.24    0.33
   1   7  15    0.03    0.28
  -1   7  15    0.06    0.30
  -1   7  15   -0.09    0.26
  -1   7  16    0.46    0.33
  -1  -7  16   -0.07    0.34
  -1   7  16    0.12    0.28
  -1   7  17    0.12    0.29
  -1  -7  17    0.32    0.36
  -1   7  17    0.06    0.34
  -1   7  18    0.04    0.36
  -1  -7  18    0.07    0.37
  -1  -7  19   -0.39    0.41
  -1   7  19    0.26    0.39
  -1  -9 -17    0.05    0.44
  -1  -9 -16    0.31    0.42
   1  -9 -15   -0.23    0.32
  -1  -9 -15    0.13    0.39
   1  -9 -14   -0.17    0.32
  -1  -9 -14   -0.25    0.37
  -1   9 -13    0.17    0.32
   1  -9 -13    0.28    0.29
  -1  -9 -13   -0.20    0.29
  -1  -9 -13    0.34    0.35
  -1  -9 -12    0.64    0.29
  -1   9 -12    0.42    0.30
   1   9 -12    0.23    0.43
   1  -9 -12    0.55    0.30
  -1  -9 -12    0.32    0.33
  -1   9 -11    0.08    0.44
   1   9 -11    0.53    0.41
  -1  -9 -11    0.36    0.27
  -1  -9 -11    0.15    0.32
  -1   9 -11    0.44    0.28
   1  -9 -11    0.36    0.28
   1  -9 -10    0.79    0.29
  -1   9 -10    0.86    0.43
  -1  -9 -10    0.82    0.30
  -1  -9 -10    0.62    0.26
  -1   9 -10    0.26    0.26
   1   9 -10    0.79    0.40
   1  -9  -9    0.23    0.25
  -1   9  -9   -0.17    0.24
  -1   9  -9    0.34    0.40
   1   9  -9    0.57    0.37
  -1  -9  -9    0.08    0.23
  -1  -9  -9    0.39    0.25
  -1   9  -8    2.00    0.42
  -1   9  -8    1.51    0.25
   1   9  -8    2.08    0.40
  -1  -9  -8    1.10    0.24
   1  -9  -8    1.77    0.26
  -1  -9  -8    1.56    0.27
  -1  -9  -7    1.12    0.21
  -1   9  -7    2.04    0.41
  -1  -9  -7    1.43    0.25
  -1   9  -7    1.33    0.22
   1   9  -7    2.12    0.37
   1  -9  -7    1.77    0.23
   1  -9  -6    2.92    0.24
  -1  -9  -6    3.18    0.27
  -1   9  -6    2.95    0.23
  -1   9  -6    3.91    0.41
   1   9  -6    4.10    0.40
  -1  -9  -6    3.20    0.24
   1  -9  -5    7.07    0.32
  -1   9  -5    7.50    0.30
  -1  -9  -5    6.67    0.34
  -1  -9  -5    7.39    0.30
  -1   9  -5    9.14    0.51
   1   9  -5    9.38    0.49
  -1  -9  -4    1.86    0.16
  -1   9  -4    1.95    0.37
   1  -9  -4    1.79    0.20
   1   9  -4    2.53    0.36
  -1  -9  -4    2.84    0.39
  -1  -9  -4    1.76    0.22
  -1   9  -3    4.66    0.43
  -1  -9  -3    6.84    0.45
  -1  -9  -2    5.53    0.45
   1  -9  -2    4.77    0.44
  -1  -9  -2    5.03    0.42
   1  -9  -1    0.57    0.36
  -1  -9  -1   -0.06    0.31
  -1  -9  -1   -0.17    0.34
  -1  -9   0    7.43    0.49
  -1  -9   0    8.09    0.50
   1  -9   0    7.07    0.50
  -1  -9   1   -0.25    0.35
   1  -9   1    0.01    0.34
   1  -9   2    5.44    0.47
  -1  -9   2    5.10    0.45
  -1  -9   3    6.72    0.48
   1  -9   3    5.81    0.49
  -1  -9   4    1.75    0.14
  -1   9   4    1.74    0.15
  -1   9   5    8.71    0.53
  -1  -9   5    7.72    0.30
  -1   9   5    7.80    0.31
  -1   9   6    3.44    0.44
  -1  -9   6    3.21    0.23
  -1   9   6    3.38    0.24
  -1   9   7    2.05    0.44
  -1   9   7    1.60    0.22
  -1  -9   7    1.53    0.21
  -1   9   8    1.36    0.24
  -1  -9   8    1.45    0.24
  -1   9   9    0.35    0.43
  -1   9   9    0.03    0.22
  -1  -9   9   -0.10    0.22
  -1   9  10    0.82    0.47
  -1  -9  10    0.68    0.25
  -1   9  10    0.69    0.25
  -1   9  11    0.43    0.26
  -1   9  11    1.05    0.49
  -1  -9  11    0.32    0.26
  -1  -9  12    0.06    0.26
  -1   9  12   -0.01    0.27
  -1   9  13    0.45    0.28
  -1  -9  13    0.10    0.28
  -1   9  13   -0.05    0.50
  -1   9  14    1.13    0.57
  -1   9  14    0.48    0.29
  -1  -9  14    0.50    0.32
  -1   9  15    0.82    0.60
  -1   9  15    0.42    0.30
  -1  -9  15    0.08    0.31
  -1   9  16    1.07    0.63
  -1  -9  16    0.44    0.34
  -1   9  16   -0.44    0.33
  -1   9  17   -0.06    0.35
  -1  -9  17    0.21    0.37
  -1   9  17    0.72    0.70
  -1   9  18    0.58    0.37
  -1  -9  18    0.02    0.38
  -1 -11 -15    0.33    0.42
   1 -11 -14   -0.06    0.32
  -1 -11 -14    0.41    0.38
   1 -11 -13    0.05    0.32
  -1 -11 -13    0.17    0.36
  -1 -11 -12    0.23    0.34
   1 -11 -12    0.15    0.30
  -1 -11 -11   -0.11    0.32
   1 -11 -11    0.28    0.30
  -1 -11 -10    0.21    0.30
   1 -11 -10    0.09    0.29
  -1 -11  -9    0.31    0.27
   1 -11  -9    0.26    0.26
   1  11  -9    0.45    0.40
   1  11  -8    1.54    0.42
  -1  11  -8    1.27    0.42
   1 -11  -8    0.57    0.24
  -1 -11  -8    0.71    0.26
   1 -11  -7    0.47    0.22
  -1  11  -7    0.98    0.40
  -1 -11  -7    0.55    0.25
  -1 -11  -6    0.94    0.26
  -1  11  -6    1.73    0.42
   1  11  -6    1.82    0.40
   1 -11  -6    0.86    0.22
  -1 -11  -5    0.83    0.25
  -1  11  -5    1.52    0.43
   1 -11  -5    0.90    0.22
   1 -11  -4    1.16    0.38
  -1 -11  -4    1.28    0.25
  -1 -11  -4    1.99    0.44
  -1 -11  -3    0.44    0.39
  -1 -11  -3    0.11    0.37
   1 -11  -3    0.29    0.41
   1 -11  -2    2.01    0.48
  -1 -11  -2    1.21    0.42
  -1 -11  -2    1.03    0.47
   1 -11  -1    1.00    0.48
  -1 -11  -1    1.05    0.48
  -1 -11  -1    0.97    0.43
  -1 -11   0    0.68    0.44
   1 -11   0    0.53    0.47
  -1 -11   0    0.76    0.43
   1 -11   1    0.99    0.46
  -1 -11   1    0.63    0.45
  -1 -11   1    0.52    0.44
   1 -11   2    1.48    0.48
  -1 -11   2    1.16    0.45
   1 -11   3    0.43    0.45
  -1 -11   3    0.17    0.44
  -1  11   7    1.37    0.43
  -1  11   8    0.45    0.47
  -1  11   9    0.09    0.46
  -1 -11  10    0.35    0.23
  -1  11  10    0.71    0.49
  -1  11  10    0.61    0.24
  -1  11  11    0.68    0.24
  -1 -11  11    0.39    0.25
  -1 -11  12    0.27    0.25
  -1  11  12    0.83    0.53
  -1  11  12    0.58    0.26
  -1  11  13   -1.18    0.55
  -1  11  14   -0.03    0.57
  -1  11  15   -0.06    0.59
  -1 -13 -13    0.42    0.39
  -1 -13 -12    0.12    0.35
  -1 -13 -11    0.18    0.32
   1 -13 -11    0.22    0.31
   1 -13 -10    0.39    0.30
  -1 -13 -10    0.48    0.30
  -1 -13  -9    0.56    0.28
   1 -13  -9    0.28    0.27
  -1 -13  -8    0.08    0.25
   1 -13  -8    0.64    0.25
  -1 -13  -7    0.65    0.27
   1 -13  -7    0.11    0.24
   1 -13  -6    0.11    0.23
  -1 -13  -6    0.35    0.27
   1 -13  -6    0.71    0.30
  -1 -13  -5    0.59    0.27
   1 -13  -5    0.30    0.34
  -1 -13  -5    0.61    0.34
   1 -13  -5    0.19    0.23
  -1 -13  -4    0.92    0.44
   1 -13  -4    0.48    0.25
  -1 -13  -4    0.24    0.27
   1 -13  -4    1.18    0.43
   1 -13  -3    0.61    0.47
  -1 -13  -3    0.94    0.48
  -1 -13  -2    0.58    0.53
   1 -13  -2    0.09    0.52
  -1 -13  -1    0.44    0.53
   1 -13  -1    0.86    0.55
   1 -13   0    0.88    0.56
  -1 -13   0   -0.26    0.55
   1 -13   1    1.02    0.56
  -1 -13   1    0.04    0.53
  -1 -13   2    0.29    0.54
   1 -13   2    0.16    0.53
   1 -13   3    0.70    0.53
  -1 -13   3    0.47    0.50
  -1  13  10    0.15    0.48
  -1  13  11   -0.13    0.51
  -1  13  12   -0.25    0.53
  -1  13  13    0.68    0.57
  -1 -15 -11   -0.10    0.35
  -1 -15 -10   -0.02    0.31
   1 -15  -9   -0.01    0.28
   1 -15  -9   -0.19    0.22
  -1 -15  -9    0.49    0.31
   1 -15  -8    0.27    0.24
   1 -15  -8    0.29    0.27
  -1 -15  -8    0.22    0.29
  -1 -15  -7   -0.45    0.28
  -1 -15  -7    0.07    0.29
   1 -15  -7    0.36    0.27
   1 -15  -7    0.22    0.26
   1 -15  -6    0.31    0.31
   1 -15  -6    0.07    0.26
  -1 -15  -6    0.50    0.33
  -1 -15  -6    0.39    0.30
   1 -15  -5    0.09    0.36
   1 -15  -5   -0.11    0.25
  -1 -15  -5   -0.32    0.37
  -1 -15  -5    0.21    0.29
  -1 -15  -4    0.19    0.30
  -1 -15  -4    0.73    0.45
   1 -15  -4    0.25    0.27
   1 -15  -4   -0.58    0.41
  -1 -15  -3    0.82    0.53
   1 -15  -3    0.21    0.48
   1 -15  -2    0.85    0.56
  -1 -15  -2    0.34    0.59
   1 -15  -1    0.70    0.60
  -1 -15  -1    1.37    0.64
   1 -15   0    0.57    0.60
  -1 -15   0    0.64    0.62
   1 -15   1    0.20    0.62
  -1 -15   1    0.91    0.61
   1 -15   2    0.34    0.60
  -1 -15   2   -0.18    0.57
  -1 -17  -7    0.19    0.36
  -1 -17  -6    0.83    0.40
  -1 -17  -6   -0.35    0.35
   1 -17  -5    0.17    0.32
  -1 -17  -5    0.74    0.37
  -1 -17  -5    0.77    0.46
   1 -17  -4    0.33    0.46
  -1 -17  -4    0.02    0.51
   1 -17  -4    0.31    0.34
  -1 -17  -4   -0.17    0.35
  -1 -17  -3   -0.22    0.59
  -1 -17  -3    0.62    0.35
   1 -17  -3    0.30    0.34
   1 -17  -3   -0.13    0.54
   1 -17  -2    0.17    0.60
  -1 -17  -2    0.55    0.66
   1 -17  -1    0.16    0.67
  -1 -17  -1    0.32    0.68
   1 -17   0   -0.61    0.72
  -1 -17   0    1.21    0.71
  -1 -17   1    0.99    0.71
   1 -17   1    1.31    0.72
   1 -17   2    0.85    0.69
  -1 -17   2    0.24    0.65
  -1 -19  -3   -0.10    0.41
  -1 -19  -2   -0.04    0.39
  -2   0 -14    0.41    0.30
  -2   0 -13    0.46    0.28
  -2   0 -12    6.30    0.41
  -2   0 -11    0.13    0.25
  -2   0 -10   43.33    1.20
  -2   0  -9    0.12    0.22
  -2   0  -9    0.10    0.22
  -2   0  -8   87.40    2.16
  -2   0  -8   90.02    2.18
  -2   0  -7    0.16    0.16
  -2   0  -7    0.01    0.17
  -2   0  -6   35.89    0.94
  -2   0  -6   34.39    0.93
  -2   0  -5   -0.03    0.11
  -2   0  -5   -0.01    0.12
  -2   0  -4  313.94    7.11
  -2   0  -4  318.08    7.10
  -2   0  -3    0.00    0.10
   2   0   0 1023.23   22.65
   2   0   1    0.15    0.06
   2   0   2 4487.43   99.25
   2   0   3    0.18    0.10
   2   0   4  317.75    7.13
  -2   0   5    0.06    0.11
  -2   0   6   37.31    0.99
  -2   0   7   -0.09    0.15
  -2   0   7    0.04    0.15
  -2   0   8   88.15    2.09
  -2   0   8   89.41    2.14
   2   0   8   83.46    2.12
   2   0   9   -0.07    0.22
   2   0   9   -0.20    0.22
  -2   0   9    0.18    0.20
  -2   0   9   -0.01    0.19
  -2   0  10   42.75    1.13
   2   0  10   45.13    1.18
  -2   0  10   42.04    1.19
  -2   0  11    0.21    0.23
   2   0  11    0.32    0.24
  -2   0  11    0.17    0.25
   2   0  11    0.15    0.26
   2   0  12    5.31    0.40
   2   0  12    6.75    0.41
  -2   0  12    6.04    0.42
  -2   0  13    0.02    0.28
   2   0  13    0.23    0.27
  -2   0  13   -0.06    0.24
   2   0  13    0.06    0.28
  -2   0  14    0.47    0.31
  -2   0  14    0.15    0.26
   2   0  14    0.15    0.30
   2   0  14    0.16    0.28
  -2   0  15   -0.02    0.31
  -2   0  15    0.30    0.27
   2   0  15   -0.17    0.29
  -2   0  16    0.64    0.29
  -2   0  16    1.02    0.34
  -2   0  17   -0.02    0.31
  -2   0  18    0.28    0.33
  -2   0  19    0.34    0.36
  -2  -2 -14    0.42    0.30
  -2   2 -14    0.53    0.30
  -2  -2 -13    0.45    0.30
  -2  -2 -13    1.09    0.30
  -2   2 -13    1.19    0.30
  -2  -2 -12   12.60    0.57
  -2  -2 -12   12.23    0.56
  -2   2 -12   12.39    0.56
  -2   2 -11    0.52    0.26
  -2  -2 -11    0.60    0.26
  -2  -2 -11    0.88    0.28
  -2  -2 -10   53.98    1.48
  -2  -2 -10   57.20    1.49
  -2  -2  -9   35.29    1.03
  -2  -2  -9   36.30    1.03
  -2  -2  -8    3.61    0.28
  -2  -2  -8    3.46    0.28
  -2  -2  -7   18.07    0.59
  -2  -2  -7   18.06    0.58
  -2  -2  -6   12.86    0.45
  -2  -2  -6   13.93    0.46
  -2  -2  -5  102.18    2.40
  -2  -2  -5  102.40    2.40
  -2  -2  -4   63.59    1.53
  -2  -2  -4   63.97    1.53
  -2  -2  -3  286.60    6.44
   2   2  -2 1386.94   30.76
  -2  -2  -2 1394.10   30.80
  -2   2  -1  301.00    6.73
  -2  -2  -1  298.71    6.70
  -2  -2  -1  300.57    6.71
  -2   2   0    0.39    0.14
   2  -2   0    0.49    0.07
   2  -2   1  291.08    6.58
  -2   2   1  297.52    6.59
  -2  -2   1  295.47    6.56
   2  -2   2 1396.27   30.83
   2   2   2 1392.36   30.82
  -2   2   2 1382.92   30.83
   2  -2   3  297.36    6.68
  -2   2   4   62.06    1.41
   2  -2   4   61.50    1.50
   2  -2   5  102.97    2.43
  -2   2   5  102.99    2.35
  -2  -2   5  103.38    2.42
   2  -2   6   13.64    0.47
  -2   2   6   14.11    0.40
  -2  -2   6   13.84    0.47
  -2   2   7   18.10    0.51
  -2  -2   7   17.96    0.58
   2   2   7   17.75    0.57
   2   2   8    3.23    0.27
  -2   2   8    2.67    0.22
  -2  -2   9   34.26    1.00
  -2   2   9   36.71    0.93
   2   2   9   34.80    0.98
   2   2  10   53.78    1.42
  -2  -2  10   54.58    1.46
  -2   2  10   56.62    1.38
   2  -2  11    0.95    0.27
  -2  -2  11    0.64    0.26
   2   2  11    0.55    0.26
  -2  -2  11    0.52    0.27
  -2   2  11    0.55    0.22
   2  -2  11    1.06    0.29
   2  -2  12   11.27    0.54
   2   2  12   11.40    0.52
   2  -2  12   12.08    0.54
  -2  -2  12   11.65    0.53
  -2  -2  12   11.69    0.55
  -2   2  12   12.40    0.48
   2  -2  13    0.81    0.28
  -2  -2  13    0.68    0.28
   2   2  13    1.05    0.29
  -2   2  13    1.40    0.26
   2  -2  13    1.26    0.30
  -2  -2  13    0.89    0.29
  -2   2  14    0.53    0.25
  -2  -2  14    0.41    0.29
   2  -2  14    0.63    0.30
  -2  -2  14    0.38    0.30
   2   2  14    0.58    0.29
   2   2  15    0.39    0.31
  -2  -2  15    0.33    0.31
  -2   2  15    0.41    0.26
  -2  -2  15    0.03    0.29
  -2   2  16   -0.01    0.26
  -2  -2  16    0.55    0.32
  -2  -2  17   -0.04    0.32
  -2   2  17   -0.20    0.27
  -2  -2  18    0.58    0.35
  -2   2  18    0.56    0.37
  -2   2  19    0.82    0.38
  -2  -2  19    0.22    0.36
  -2  -4 -15    1.05    0.37
  -2   4 -14   -0.02    0.29
  -2  -4 -14    0.30    0.33
  -2  -4 -13    0.84    0.33
  -2  -4 -13    0.76    0.31
  -2   4 -13    0.67    0.30
  -2  -4 -12    1.95    0.32
  -2  -4 -12    1.89    0.32
  -2   4 -12    2.21    0.32
  -2  -4 -11    0.77    0.26
  -2  -4 -11    0.47    0.27
  -2   4 -11    0.42    0.26
  -2  -4 -10   29.74    0.91
  -2   4 -10   28.92    0.89
  -2  -4 -10   29.03    0.91
  -2  -4  -9    2.66    0.30
  -2   4  -9    2.73    0.27
  -2  -4  -9    2.50    0.28
  -2  -4  -8   10.86    0.45
   2  -4  -8   10.00    0.37
  -2  -4  -8    9.56    0.44
  -2   4  -8   10.39    0.43
   2  -4  -7   45.13    1.10
  -2  -4  -7   42.54    1.17
  -2  -4  -7   46.59    1.19
  -2   4  -7   43.47    1.17
  -2  -4  -6   66.64    1.67
  -2  -4  -6   69.24    1.67
   2  -4  -6   68.03    1.59
  -2   4  -6   67.02    1.66
   2  -4  -5   22.30    0.58
  -2  -4  -5   23.81    0.66
  -2   4  -5   23.98    0.65
  -2  -4  -5   23.13    0.66
  -2  -4  -4   47.14    1.20
  -2   4  -4   48.74    1.19
   2  -4  -4   47.94    1.12
   2   4  -4   48.30    1.20
  -2  -4  -4   49.76    1.19
  -2   4  -3  113.82    2.58
   2   4  -3  111.09    2.61
  -2  -4  -3  112.15    2.61
  -2   4  -3  115.35    2.66
   2  -4  -3  112.72    2.53
  -2  -4  -3  111.00    2.59
  -2   4  -2   28.40    0.79
  -2  -4  -2   29.24    0.74
  -2  -4  -2   28.36    0.77
  -2   4  -1   68.90    1.67
  -2  -4  -1   69.47    1.66
  -2   4   0  245.50    5.56
  -2  -4   1   67.35    1.59
  -2   4   2   28.84    0.79
  -2  -4   2   28.91    0.76
  -2   4   3  107.61    2.55
  -2  -4   4   48.88    1.18
  -2   4   4   47.95    1.18
   2   4   4   45.71    1.17
  -2   4   4   48.38    1.26
  -2   4   5   23.03    0.75
   2   4   5   22.83    0.66
  -2   4   5   24.59    0.67
  -2  -4   5   23.21    0.67
  -2  -4   6   66.50    1.65
  -2   4   6   68.53    1.66
  -2   4   6   67.53    1.56
   2   4   6   65.01    1.64
   2  -4   6   68.72    1.69
  -2   4   7   44.64    1.17
   2   4   7   42.37    1.15
   2  -4   7   46.38    1.21
  -2   4   7   43.80    1.07
  -2  -4   7   44.70    1.17
  -2   4   8   10.67    0.35
  -2   4   8   11.01    0.45
  -2  -4   8   10.65    0.44
   2  -4   8   10.87    0.48
   2   4   8    9.60    0.42
  -2  -4   9    3.03    0.28
   2   4   9    2.71    0.26
  -2   4   9    2.08    0.25
  -2   4   9    2.74    0.21
   2  -4   9    2.97    0.31
  -2   4  10   28.70    0.77
   2   4  10   27.13    0.83
  -2   4  10   26.72    0.86
  -2  -4  10   26.72    0.87
  -2   4  11    0.23    0.19
  -2   4  11    0.38    0.26
   2   4  11    0.30    0.23
  -2  -4  11    0.25    0.25
  -2   4  12    1.52    0.24
   2   4  12    1.44    0.28
  -2  -4  12    1.75    0.31
  -2   4  12    1.50    0.30
  -2   4  13    1.30    0.25
  -2  -4  13    1.24    0.32
   2   4  13    0.82    0.27
   2  -4  13    1.33    0.33
  -2   4  13    0.89    0.30
  -2  -4  13    0.91    0.30
  -2   4  14    0.49    0.24
   2   4  14   -0.21    0.27
  -2  -4  14    0.24    0.32
  -2  -4  14   -0.17    0.29
  -2   4  14    0.09    0.29
  -2   4  15    0.27    0.25
  -2   4  15    0.10    0.30
   2   4  15    0.48    0.29
  -2  -4  15    0.35    0.30
  -2   4  16    0.46    0.31
  -2  -4  16    0.11    0.31
  -2   4  16    0.88    0.28
  -2   4  17    0.13    0.33
  -2  -4  17    0.31    0.34
  -2   4  17   -0.05    0.28
  -2   4  18    0.11    0.29
  -2   4  18    0.07    0.35
  -2  -4  18    0.48    0.36
  -2  -4  19    0.58    0.39
  -2   4  19    0.32    0.39
  -2  -6 -17   -0.41    0.41
  -2  -6 -16    0.87    0.41
  -2  -6 -15   -0.04    0.36
  -2  -6 -14    0.98    0.36
  -2  -6 -13    1.34    0.33
  -2  -6 -13    1.03    0.34
  -2   6 -13    0.68    0.32
  -2  -6 -12    0.60    0.31
  -2   6 -12    0.76    0.29
  -2  -6 -12    1.18    0.31
   2  -6 -11    0.17    0.22
  -2  -6 -11    0.09    0.28
  -2   6 -11   -0.42    0.27
  -2  -6 -11    0.47    0.27
  -2   6 -10    4.53    0.35
  -2  -6 -10    3.63    0.35
  -2  -6 -10    4.12    0.34
   2  -6 -10    3.82    0.28
  -2   6  -9    1.47    0.27
  -2  -6  -9    1.02    0.25
  -2  -6  -9    0.97    0.27
   2  -6  -9    0.94    0.20
  -2   6  -8    2.90    0.27
   2  -6  -8    2.46    0.21
  -2  -6  -8    2.26    0.28
  -2  -6  -8    2.44    0.26
  -2  -6  -7    2.57    0.27
   2  -6  -7    2.90    0.21
  -2   6  -7    2.95    0.25
  -2  -6  -7    2.80    0.25
   2   6  -7    2.58    0.32
  -2  -6  -6   23.34    0.73
   2   6  -6   23.60    0.76
   2  -6  -6   25.49    0.66
  -2  -6  -6   24.55    0.72
  -2   6  -6   25.31    0.72
  -2  -6  -5    6.52    0.30
  -2  -6  -5    6.90    0.33
   2   6  -5    7.70    0.40
  -2   6  -5    7.48    0.31
   2  -6  -5    7.34    0.26
  -2  -6  -4    9.17    0.37
   2  -6  -4    8.74    0.28
  -2  -6  -4    8.71    0.32
  -2   6  -4    8.83    0.32
   2   6  -4    8.66    0.40
  -2  -6  -3    8.82    0.35
  -2  -6  -3    9.66    0.46
  -2  -6  -3    9.02    0.31
  -2   6  -3    8.89    0.30
   2   6  -3    8.98    0.40
  -2  -6  -2    7.29    0.38
  -2  -6  -2    6.70    0.24
  -2   6  -2    6.58    0.40
  -2   6  -2    6.58    0.23
  -2  -6  -1    2.34    0.29
  -2   6  -1    2.09    0.30
   2  -6   0   33.68    1.00
  -2  -6   0   34.73    0.96
  -2  -6   0   35.85    0.97
  -2  -6   1    2.47    0.28
   2  -6   1    2.39    0.34
   2  -6   2    7.52    0.43
  -2  -6   2    7.27    0.39
  -2  -6   3    8.19    0.30
  -2   6   3    8.19    0.30
  -2  -6   4    8.92    0.33
  -2   6   4    9.29    0.46
  -2   6   4    8.38    0.32
  -2  -6   5    6.77    0.31
  -2   6   5    6.51    0.29
  -2  -6   6   25.60    0.74
  -2   6   6   25.12    0.73
  -2   6   6   26.52    0.86
  -2   6   7    2.76    0.24
  -2  -6   7    3.11    0.26
  -2   6   7    3.40    0.42
   2   6   8    1.73    0.24
  -2   6   8    1.70    0.24
  -2   6   8    2.61    0.43
  -2  -6   8    2.27    0.26
   2  -6   9    0.59    0.28
   2   6   9    1.10    0.24
  -2  -6   9    1.22    0.25
  -2   6   9    1.11    0.23
  -2   6   9    1.07    0.42
   2   6  10    3.47    0.30
  -2   6  10    3.94    0.32
  -2   6  10    3.64    0.23
  -2  -6  10    4.16    0.35
  -2   6  11   -0.04    0.18
  -2  -6  11    0.35    0.26
   2   6  11    0.26    0.23
  -2   6  11    0.06    0.24
   2  -6  11    0.23    0.31
   2   6  12    0.90    0.27
  -2   6  12    0.91    0.28
  -2   6  12    1.04    0.22
  -2  -6  12    0.95    0.30
   2   6  13    0.85    0.29
  -2   6  13    1.22    0.23
  -2  -6  13    1.08    0.32
  -2   6  13    0.86    0.29
  -2   6  14    0.74    0.24
  -2  -6  14    0.79    0.32
  -2   6  14    0.70    0.30
   2   6  14    1.07    0.30
   2   6  15    0.51    0.30
  -2  -6  15    0.65    0.33
  -2   6  15    0.24    0.25
  -2   6  15   -0.18    0.31
  -2  -6  16    0.63    0.36
  -2   6  16    0.60    0.33
  -2   6  16    0.77    0.29
  -2   6  17    0.28    0.28
  -2   6  17   -0.27    0.33
  -2  -6  17    0.21    0.35
  -2   6  18    0.44    0.38
  -2  -6  18    0.44    0.39
  -2  -6  19    0.57    0.43
  -2   6  19    0.42    0.41
  -2  -8 -18   -0.21    0.48
  -2  -8 -17   -0.15    0.45
  -2  -8 -16   -0.12    0.42
  -2  -8 -15    0.85    0.42
  -2  -8 -14    0.15    0.37
   2  -8 -13    0.06    0.26
  -2  -8 -13    0.39    0.34
   2   8 -13    0.07    0.41
  -2  -8 -13    0.03    0.29
  -2   8 -13    0.19    0.30
   2  -8 -12    0.70    0.27
  -2  -8 -12    1.04    0.34
  -2   8 -12    0.65    0.30
   2   8 -12    1.13    0.42
  -2  -8 -12    0.48    0.29
  -2  -8 -11    0.11    0.26
  -2  -8 -11    0.05    0.32
  -2   8 -11    0.21    0.45
  -2   8 -11    0.28    0.28
   2   8 -11   -0.09    0.38
   2  -8 -11    0.50    0.24
  -2   8 -10    1.26    0.29
   2   8 -10    0.68    0.38
  -2   8 -10    0.89    0.45
  -2  -8 -10    1.36    0.28
   2  -8 -10    1.44    0.25
  -2  -8 -10    0.68    0.30
  -2  -8  -9    1.43    0.30
  -2   8  -9    1.47    0.26
   2   8  -9    1.11    0.36
  -2   8  -9    1.30    0.43
  -2  -8  -9    1.15    0.26
   2  -8  -9    1.43    0.24
  -2  -8  -8    0.37    0.22
  -2   8  -8    0.20    0.37
   2  -8  -8    0.09    0.20
  -2  -8  -8    0.76    0.25
   2   8  -8    0.63    0.33
  -2   8  -8    0.87    0.23
  -2  -8  -7    0.99    0.24
  -2  -8  -7    1.16    0.22
   2  -8  -7    0.93    0.20
  -2   8  -7    1.18    0.23
   2   8  -7    1.55    0.35
  -2  -8  -6    2.75    0.23
   2  -8  -6    2.26    0.20
   2   8  -6    3.08    0.34
  -2   8  -6    2.84    0.24
  -2  -8  -6    2.56    0.27
   2   8  -5    1.27    0.31
  -2   8  -5    1.51    0.19
   2  -8  -5    1.35    0.17
  -2  -8  -5    1.11    0.22
  -2  -8  -5    1.43    0.18
  -2  -8  -4   10.51    0.43
  -2  -8  -4    9.61    0.34
   2  -8  -4    9.37    0.33
  -2   8  -4    9.86    0.34
  -2   8  -3    0.77    0.13
  -2  -8  -3    0.54    0.13
  -2  -8  -2    1.16    0.12
  -2   8  -2    1.38    0.12
   2  -8  -1    1.91    0.37
  -2  -8  -1    2.88    0.38
  -2  -8  -1    1.13    0.10
  -2   8  -1    1.10    0.10
  -2  -8  -1    2.12    0.33
  -2  -8   0    1.64    0.33
   2  -8   0    1.56    0.37
  -2  -8   0    1.27    0.33
   2  -8   1    1.80    0.36
  -2  -8   1    2.15    0.34
   2  -8   2    2.25    0.37
  -2  -8   2    1.42    0.13
  -2   8   2    1.30    0.12
  -2  -8   2    2.12    0.35
  -2   8   3    0.88    0.13
  -2  -8   3    1.14    0.33
  -2  -8   3    0.87    0.14
  -2   8   4    9.97    0.35
  -2  -8   4   10.45    0.36
  -2  -8   5    1.50    0.19
  -2   8   5    1.91    0.37
  -2   8   5    1.08    0.18
  -2   8   6    2.58    0.23
  -2  -8   6    2.46    0.23
  -2  -8   7    1.33    0.23
  -2   8   7    1.09    0.41
  -2   8   7    1.18    0.21
  -2   8   8    0.07    0.41
  -2  -8   8    0.09    0.22
  -2   8   8    0.21    0.20
  -2  -8   9    1.48    0.27
  -2   8   9    1.55    0.46
  -2   8   9    1.22    0.25
  -2   8  10    1.14    0.27
  -2  -8  10    0.88    0.28
  -2   8  10    1.77    0.49
  -2   8  11   -0.26    0.25
  -2  -8  11   -0.22    0.27
  -2  -8  12    1.29    0.31
  -2   8  12    0.96    0.28
  -2   8  12    1.63    0.53
   2   8  13   -0.03    0.50
  -2   8  13    0.03    0.53
  -2  -8  13   -0.28    0.31
  -2   8  13   -0.15    0.27
  -2   8  14    0.39    0.28
   2   8  14    0.23    0.28
   2   8  14    0.52    0.54
  -2  -8  14    0.34    0.32
  -2   8  14    1.62    0.59
   2   8  15    0.49    0.57
  -2   8  15    0.27    0.31
  -2  -8  15   -0.10    0.32
  -2   8  15    0.99    0.62
  -2   8  16    0.28    0.33
  -2  -8  16    0.21    0.34
   2   8  16    1.01    0.62
  -2   8  16    1.43    0.63
  -2  -8  17    0.69    0.40
  -2   8  17    1.14    0.69
  -2   8  17    0.57    0.37
   2   8  17    0.92    0.65
  -2   8  18    0.44    0.39
  -2  -8  18    0.07    0.41
  -2 -10 -17    0.08    0.48
  -2 -10 -16    0.17    0.44
  -2 -10 -15    0.21    0.43
  -2 -10 -14    0.54    0.40
   2 -10 -14    0.40    0.29
   2 -10 -13   -0.06    0.26
  -2 -10 -13   -0.26    0.29
  -2  10 -13    0.21    0.31
  -2 -10 -13   -0.02    0.37
   2 -10 -12    0.29    0.27
  -2 -10 -12    0.03    0.26
  -2  10 -12    0.27    0.29
  -2 -10 -12   -0.02    0.35
  -2 -10 -11    0.34    0.33
  -2  10 -11    0.45    0.27
  -2 -10 -11    0.41    0.27
   2  10 -11    0.11    0.40
   2 -10 -11    0.54    0.25
  -2  10 -10    0.37    0.26
  -2 -10 -10    0.31    0.25
   2  10 -10    0.15    0.39
  -2 -10 -10    0.18    0.31
   2 -10 -10    0.13    0.25
  -2  10  -9   -0.40    0.24
   2  10  -9    0.49    0.37
  -2  10  -9    0.61    0.43
   2 -10  -9   -0.07    0.24
  -2 -10  -9    0.11    0.23
  -2 -10  -9    0.11    0.27
   2 -10  -8    0.58    0.23
  -2  10  -8    1.30    0.43
   2  10  -8    1.47    0.38
  -2 -10  -8    0.72    0.23
  -2  10  -8    0.65    0.23
  -2 -10  -8    0.66    0.27
   2  10  -7    1.62    0.39
  -2 -10  -7    1.64    0.23
  -2 -10  -7    1.19    0.28
   2 -10  -7    1.31    0.23
  -2  10  -7    0.81    0.22
   2  10  -6    0.96    0.36
  -2 -10  -6    0.41    0.23
   2 -10  -6    0.29    0.19
  -2  10  -6    1.16    0.41
  -2  10  -6    0.43    0.18
  -2 -10  -6    0.66    0.19
  -2 -10  -5    0.02    0.23
  -2 -10  -5    0.38    0.17
  -2  10  -5    0.43    0.37
  -2  10  -5    0.06    0.15
   2  10  -5    0.67    0.35
   2 -10  -5    0.16    0.17
  -2 -10  -4    0.70    0.15
  -2  10  -4    0.89    0.14
  -2 -10  -4    0.99    0.25
  -2 -10  -4    2.00    0.42
   2 -10  -4    2.14    0.41
   2 -10  -4    1.52    0.37
   2 -10  -3    2.81    0.44
  -2 -10  -3    1.29    0.13
   2 -10  -3    2.39    0.41
  -2 -10  -3    3.23    0.43
   2 -10  -2    2.46    0.46
   2 -10  -2    2.41    0.41
  -2 -10  -2    2.50    0.44
  -2 -10  -2    2.43    0.41
  -2 -10  -1    1.36    0.39
   2 -10  -1    0.94    0.43
  -2 -10  -1    1.15    0.44
   2 -10  -1    1.14    0.40
   2 -10   0   -0.37    0.41
  -2 -10   0    0.09    0.39
   2 -10   0    0.63    0.44
  -2 -10   0    0.21    0.37
  -2 -10   1    0.97    0.40
  -2 -10   1    1.28    0.42
   2 -10   1    1.23    0.46
   2 -10   1    1.26    0.44
   2 -10   2    1.87    0.45
  -2 -10   2    1.62    0.41
  -2 -10   3    2.64    0.42
   2 -10   3    2.46    0.46
  -2  10   3    1.68    0.13
  -2 -10   4    0.72    0.14
  -2  10   4    0.76    0.14
  -2  10   5    0.16    0.15
  -2 -10   5    0.14    0.15
  -2  10   6    0.29    0.18
  -2  10   6    0.60    0.41
  -2 -10   6    0.42    0.18
  -2  10   7    1.17    0.21
  -2 -10   7    1.13    0.21
  -2  10   7    1.12    0.44
  -2 -10   8    0.68    0.23
  -2  10   8    0.22    0.21
  -2  10   9    0.02    0.45
  -2 -10   9    0.11    0.22
  -2  10   9    0.28    0.22
  -2  10  10    0.29    0.24
  -2 -10  10    0.65    0.25
  -2  10  10    0.23    0.46
   2  10  11    0.96    0.51
  -2  10  11    0.12    0.50
  -2  10  11    0.29    0.24
  -2 -10  11   -0.04    0.25
   2  10  12   -0.15    0.50
  -2  10  12    0.04    0.26
  -2  10  12    0.21    0.52
  -2 -10  12   -0.10    0.26
  -2  10  13    0.44    0.52
  -2 -10  13    0.29    0.28
   2  10  13    0.11    0.50
  -2  10  13    0.65    0.28
  -2  10  14    0.27    0.29
   2  10  14    0.64    0.54
  -2 -10  14    0.10    0.29
  -2  10  14    0.49    0.54
  -2  10  15    0.48    0.33
   2  10  15    0.61    0.58
  -2 -10  15    0.18    0.31
  -2  10  15    1.22    0.62
  -2 -10  16    0.23    0.34
   2  10  16    0.75    0.62
  -2  10  16    0.30    0.63
  -2  10  16    0.06    0.32
  -2  10  17    0.06    0.35
  -2 -10  17   -0.08    0.35
  -2  10  18    0.04    0.37
  -2 -10  18    0.24    0.38
  -2 -12 -15    0.07    0.43
  -2 -12 -14    0.17    0.41
  -2 -12 -13   -0.08    0.39
  -2 -12 -12   -0.40    0.35
  -2 -12 -11   -0.29    0.32
   2 -12 -11    0.01    0.28
   2 -12 -10    0.54    0.28
  -2 -12 -10    0.42    0.29
   2  12  -9    0.74    0.39
  -2 -12  -9    0.26    0.28
   2 -12  -9    1.00    0.28
   2 -12  -8    0.20    0.23
  -2 -12  -8    0.23    0.27
   2  12  -8    0.25    0.39
   2  12  -7    0.60    0.39
  -2 -12  -7    0.01    0.27
   2 -12  -7    0.05    0.22
  -2 -12  -6    0.47    0.27
   2 -12  -6    1.20    0.32
   2 -12  -6    0.47    0.21
   2 -12  -5    0.63    0.35
   2 -12  -5    0.15    0.20
  -2 -12  -5    0.13    0.26
   2 -12  -4    0.64    0.44
  -2 -12  -4   -0.18    0.26
  -2 -12  -4    0.74    0.45
   2 -12  -4    0.44    0.42
  -2 -12  -3    1.80    0.48
  -2 -12  -3    1.31    0.48
   2 -12  -3    1.47    0.48
   2 -12  -3    2.25    0.47
   2 -12  -2    0.06    0.49
   2 -12  -2    0.92    0.47
  -2 -12  -2    0.80    0.50
  -2 -12  -2    0.88    0.46
  -2 -12  -1    0.06    0.47
   2 -12  -1    0.38    0.48
  -2 -12  -1    1.22    0.51
   2 -12  -1    0.44    0.52
  -2 -12   0    1.03    0.49
  -2 -12   0    1.39    0.53
   2 -12   0    1.16    0.54
   2 -12   0    1.75    0.53
  -2 -12   1    0.76    0.49
   2 -12   1    0.93    0.54
  -2 -12   1    0.21    0.50
   2 -12   1    0.31    0.52
  -2 -12   2    0.60    0.47
   2 -12   2    0.24    0.50
  -2 -12   2    0.66    0.47
   2 -12   2    0.63    0.55
  -2 -12   3    1.32    0.47
   2 -12   3    1.08    0.51
  -2 -12   7    0.39    0.18
  -2  12   7    0.54    0.18
  -2  12   8    0.27    0.19
  -2 -12   8    0.31    0.20
  -2  12   8    0.75    0.47
   2  12   9    0.64    0.47
  -2 -12   9    0.27    0.21
  -2  12   9    0.49    0.21
  -2  12   9    1.15    0.48
   2  12  10    0.75    0.49
  -2 -12  10    0.42    0.23
  -2  12  10    0.92    0.49
  -2  12  10    0.37    0.22
  -2  12  11    0.23    0.51
   2  12  11    0.72    0.51
  -2  12  11    0.11    0.23
  -2 -12  11    0.06    0.23
  -2 -12  12    0.50    0.26
   2  12  12   -0.03    0.51
  -2  12  12   -0.03    0.24
  -2  12  12   -0.25    0.52
   2  12  13    0.85    0.56
  -2  12  13    0.52    0.54
  -2 -12  13    0.11    0.25
  -2  12  13    0.25    0.26
  -2  12  14   -0.39    0.60
   2  12  14   -0.24    0.56
  -2 -12  14    0.24    0.26
  -2  12  14    0.46    0.30
  -2 -12  15   -0.07    0.28
  -2 -14 -13    0.20    0.38
  -2 -14 -12   -0.42    0.37
  -2 -14 -11    0.35    0.33
  -2 -14 -10    0.57    0.32
   2 -14  -9    0.14    0.26
  -2 -14  -9    0.40    0.29
   2 -14  -8    0.27    0.25
  -2 -14  -8    0.03    0.28
   2 -14  -8    0.36    0.25
   2 -14  -7    0.59    0.28
   2 -14  -7    0.22    0.23
   2 -14  -6    0.21    0.23
  -2 -14  -6   -0.12    0.28
   2 -14  -6   -0.04    0.31
   2 -14  -5    0.36    0.23
  -2 -14  -5    0.46    0.37
  -2 -14  -5    0.06    0.28
   2 -14  -5    0.48    0.36
  -2 -14  -4   -0.02    0.29
  -2 -14  -4    0.61    0.44
   2 -14  -4    0.21    0.24
   2 -14  -4   -0.04    0.42
  -2 -14  -3   -0.11    0.30
  -2 -14  -3    0.27    0.51
   2 -14  -3    0.54    0.50
   2 -14  -2    1.20    0.56
  -2 -14  -2    0.07    0.55
   2 -14  -1   -0.29    0.56
  -2 -14  -1    0.93    0.58
  -2 -14   0    0.27    0.57
   2 -14   0    0.58    0.59
   2 -14   1    0.32    0.60
  -2 -14   1    0.02    0.52
  -2 -14   2    0.90    0.54
   2 -14   2   -0.13    0.57
  -2 -14   3    0.44    0.51
   2  14  12    0.54    0.56
  -2  14  12   -0.17    0.56
  -2 -16 -10    0.13    0.35
  -2 -16  -9   -0.22    0.33
   2 -16  -8   -0.06    0.27
  -2 -16  -8    0.01    0.32
  -2 -16  -8   -0.17    0.33
  -2 -16  -7    0.67    0.36
  -2 -16  -7   -0.31    0.33
   2 -16  -7   -0.06    0.30
  -2 -16  -6   -0.35    0.39
   2 -16  -6    0.36    0.35
  -2 -16  -6    0.35    0.33
   2 -16  -6   -0.01    0.27
  -2 -16  -5   -0.09    0.34
   2 -16  -5   -0.48    0.39
   2 -16  -5    0.18    0.28
  -2 -16  -5    0.02    0.44
   2 -16  -4   -0.03    0.28
  -2 -16  -4    0.64    0.50
  -2 -16  -4    0.04    0.33
   2 -16  -4    0.24    0.45
  -2 -16  -3    0.09    0.33
   2 -16  -3    0.25    0.52
  -2 -16  -3    0.29    0.57
  -2 -16  -2    0.96    0.64
   2 -16  -2   -0.52    0.56
  -2 -16  -1   -0.50    0.64
   2 -16  -1   -0.95    0.60
  -2 -16   0    0.32    0.61
   2 -16   0    0.57    0.65
  -2 -16   1    0.54    0.63
   2 -16   1   -0.19    0.65
  -2 -16   2   -0.39    0.56
   2 -16   2    0.34    0.62
  -2 -18  -7    0.06    0.40
  -2 -18  -6    0.22    0.41
  -2 -18  -5    0.31    0.40
  -2 -18  -4   -0.23    0.39
  -2 -18  -3   -0.49    0.67
  -2 -18  -3   -0.08    0.38
  -2 -18  -2    0.06    0.38
  -2 -18  -2    0.80    0.69
  -2 -18  -1   -0.33    0.70
  -2 -18   0   -0.10    0.68
  -2 -18   1    0.03    0.65
  -3  -1 -13    1.77    0.32
  -3  -1 -12    6.36    0.44
  -3  -1 -12    6.23    0.41
  -3  -1 -11    0.93    0.28
  -3  -1 -11    1.52    0.28
  -3  -1 -10   11.85    0.51
  -3  -1 -10   11.66    0.51
  -3   1  -9    5.59    0.35
  -3  -1  -9    5.85    0.35
  -3  -1  -9    5.13    0.34
  -3  -1  -8    6.94    0.37
  -3   1  -8    7.30    0.38
  -3  -1  -8    6.99    0.36
  -3  -1  -7   17.61    0.57
  -3   1  -7   16.63    0.57
  -3  -1  -7   16.27    0.56
  -3   1  -6   16.10    0.54
  -3  -1  -6   15.61    0.52
  -3  -1  -6   15.25    0.52
  -3  -1  -5    9.71    0.37
  -3  -1  -5    9.45    0.36
  -3  -1  -4   11.87    0.40
  -3  -1  -3  214.35    4.86
   3  -1  -1   52.69    1.20
   3  -1  -1   52.68    1.23
   3  -1   0  365.54    8.15
  -3   1   0  364.07    8.17
   3  -1   0  364.04    8.13
  -3   1   0  373.76    8.16
   3  -1   1   51.55    1.22
  -3   1   1   55.34    1.19
   3   1   1   53.06    1.23
   3   1   1   51.90    1.20
  -3   1   1   48.72    1.20
   3   1   2  239.96    5.34
   3  -1   2  232.58    5.34
  -3   1   2  238.32    5.28
   3   1   3  221.22    5.00
   3  -1   3  221.26    5.00
   3   1   4   12.62    0.40
   3  -1   4   12.61    0.41
   3   1   5    8.91    0.34
   3  -1   5    8.96    0.34
  -3  -1   6   15.77    0.53
   3  -1   6   15.42    0.51
   3  -1   7   16.31    0.55
  -3  -1   7   17.39    0.57
  -3   1   7   16.56    0.48
  -3  -1   8    6.68    0.36
  -3   1   8    6.73    0.29
  -3   1   9    5.35    0.28
  -3  -1   9    5.61    0.34
   3   1   9    5.25    0.34
   3   1  10   11.85    0.50
  -3  -1  10   11.64    0.52
  -3   1  10   12.01    0.44
  -3  -1  11    1.59    0.27
   3   1  11    1.51    0.27
   3  -1  11    1.66    0.29
  -3  -1  11    1.71    0.29
  -3   1  11    1.55    0.23
   3  -1  12    6.65    0.43
  -3   1  12    6.26    0.35
  -3  -1  12    5.92    0.41
   3   1  12    6.43    0.41
  -3  -1  12    6.32    0.39
  -3  -1  13    2.01    0.30
  -3  -1  13    1.77    0.33
   3   1  13    2.28    0.34
   3  -1  13    1.14    0.32
  -3   1  13    1.67    0.27
   3   1  14    1.65    0.33
   3  -1  14    1.78    0.34
  -3   1  14    1.98    0.29
  -3  -1  14    1.48    0.34
  -3  -1  14    1.54    0.31
  -3  -1  15   -0.04    0.30
  -3   1  15    0.01    0.26
  -3  -1  15    0.11    0.27
  -3  -1  16    0.10    0.27
  -3   1  16   -0.03    0.27
  -3  -1  16   -0.30    0.32
  -3   1  17   -0.09    0.27
  -3  -1  17    0.54    0.34
  -3  -1  18    0.24    0.35
  -3  -1  19    0.05    0.37
  -3  -3 -15    0.21    0.35
  -3  -3 -14    1.14    0.36
  -3  -3 -13    0.99    0.31
  -3   3 -13    1.05    0.30
  -3  -3 -13    0.96    0.33
  -3  -3 -12    3.29    0.35
  -3   3 -12    2.79    0.34
  -3  -3 -12    3.41    0.36
  -3  -3 -11    2.83    0.33
  -3   3 -11    2.62    0.32
  -3  -3 -11    2.91    0.35
  -3  -3 -10    4.06    0.34
  -3  -3 -10    4.53    0.36
  -3   3 -10    4.13    0.34
  -3   3  -9    0.95    0.22
  -3  -3  -9    0.91    0.26
  -3  -3  -9    1.62    0.26
  -3  -3  -8   35.03    1.01
  -3   3  -8   34.35    0.98
  -3  -3  -8   36.03    1.00
  -3   3  -7   17.04    0.57
  -3  -3  -7   16.58    0.58
  -3  -3  -7   16.71    0.57
  -3  -3  -6    2.03    0.22
  -3   3  -6    1.66    0.21
  -3  -3  -6    1.67    0.21
  -3  -3  -5   28.25    0.81
  -3  -3  -5   28.64    0.80
  -3   3  -5   30.89    0.81
  -3  -3  -4   61.81    1.51
  -3  -3  -3   36.82    0.94
   3   3  -3   35.74    0.87
  -3   3  -2  206.66    4.77
  -3  -3  -2  210.49    4.74
  -3   3  -1   19.25    0.57
   3  -3  -1   18.16    0.46
  -3  -3  -1   18.90    0.53
  -3  -3  -1   19.42    0.53
   3  -3  -1   19.91    0.54
  -3   3   0   32.69    0.84
   3  -3   0   32.33    0.78
   3  -3   0   32.05    0.81
  -3  -3   0   31.89    0.81
   3  -3   1   18.83    0.50
  -3  -3   1   18.81    0.48
   3  -3   2  212.54    4.78
   3   3   2  214.68    4.78
  -3   3   2  206.42    4.78
  -3   3   3   36.51    0.95
   3  -3   3   36.86    0.93
   3   3   3   35.18    0.94
   3  -3   4   64.79    1.58
  -3   3   5   30.04    0.69
   3  -3   5   27.31    0.81
  -3   3   6    1.98    0.22
  -3   3   6    2.11    0.12
  -3  -3   6    1.77    0.21
   3  -3   6    1.60    0.22
  -3   3   7   17.91    0.47
   3  -3   7   17.23    0.60
   3   3   7   16.08    0.56
  -3   3   7   17.73    0.59
  -3  -3   7   16.50    0.58
  -3   3   8   36.68    1.04
  -3   3   8   37.33    0.91
   3  -3   8   36.79    1.03
   3   3   8   33.47    0.99
  -3  -3   8   36.35    1.03
  -3  -3   9    1.02    0.24
  -3   3   9    1.25    0.24
  -3   3   9    1.17    0.17
   3  -3   9    1.43    0.26
   3   3   9    1.09    0.24
  -3   3  10    5.09    0.27
   3   3  10    4.19    0.33
  -3   3  10    4.94    0.36
  -3  -3  10    4.83    0.36
  -3  -3  11    2.27    0.32
  -3   3  11    2.74    0.24
   3   3  11    2.39    0.31
  -3   3  11    3.06    0.32
  -3  -3  12    2.82    0.35
  -3   3  12    3.14    0.27
  -3   3  12    3.00    0.35
   3   3  12    3.02    0.33
  -3  -3  13    0.60    0.31
   3   3  13    1.17    0.30
  -3   3  13    0.45    0.23
  -3   3  13    0.62    0.29
  -3  -3  13    0.71    0.30
   3  -3  13    1.03    0.31
  -3  -3  14    1.12    0.33
   3   3  14    1.68    0.32
  -3   3  14    0.97    0.33
  -3   3  14    1.36    0.26
  -3  -3  14    1.13    0.32
  -3   3  15    0.12    0.31
  -3   3  15    0.40    0.26
  -3  -3  15    0.18    0.33
  -3  -3  15   -0.07    0.30
  -3   3  16    0.15    0.26
  -3   3  16    0.02    0.32
  -3  -3  16    0.30    0.32
  -3   3  17    0.11    0.27
  -3  -3  17    0.30    0.34
  -3   3  17   -0.11    0.33
  -3   3  18    0.34    0.35
  -3  -3  18    0.36    0.37
  -3   3  18    0.41    0.29
  -3  -3  19    0.31    0.39
  -3   3  19   -0.05    0.38
  -3  -5 -17   -0.15    0.41
  -3  -5 -16    0.23    0.38
  -3  -5 -15    0.04    0.35
  -3  -5 -14    0.40    0.36
  -3  -5 -13    0.28    0.31
  -3   5 -13    0.12    0.30
  -3  -5 -13    0.51    0.33
  -3  -5 -12    3.39    0.39
  -3  -5 -12    4.10    0.38
  -3   5 -12    3.46    0.36
  -3  -5 -11    1.68    0.32
  -3   5 -11    1.72    0.31
  -3  -5 -11    1.98    0.33
  -3   5 -10    7.32    0.43
  -3  -5 -10    6.92    0.43
  -3  -5 -10    7.27    0.45
  -3  -5  -9    3.40    0.32
  -3  -5  -9    2.95    0.32
  -3   5  -9    3.66    0.32
  -3  -5  -8   16.55    0.58
  -3   5  -8   15.73    0.56
   3  -5  -7    1.25    0.14
  -3  -5  -7    1.31    0.24
  -3  -5  -7    1.34    0.22
  -3   5  -7    1.11    0.22
   3   5  -6   18.87    0.57
   3  -5  -6   16.53    0.45
  -3  -5  -6   17.05    0.58
  -3  -5  -6   17.64    0.57
  -3   5  -6   17.69    0.56
   3  -5  -5    0.42    0.09
  -3  -5  -5    0.58    0.20
  -3   5  -5    0.37    0.18
   3   5  -5    0.26    0.23
  -3  -5  -5    0.29    0.18
  -3   5  -5    0.48    0.29
   3  -5  -4    0.75    0.09
  -3   5  -4    0.64    0.17
   3   5  -4    0.49    0.22
  -3  -5  -4    0.62    0.18
  -3  -5  -4    0.53    0.16
  -3   5  -4    0.54    0.30
   3   5  -3    3.13    0.25
  -3  -5  -3    3.70    0.24
  -3   5  -3    3.37    0.35
  -3  -5  -2   72.79    1.76
  -3   5  -2   70.59    1.80
  -3  -5  -2   70.12    1.78
   3  -5  -2   76.84    1.80
  -3   5  -1    4.33    0.34
  -3  -5  -1    4.02    0.31
   3  -5  -1    4.53    0.32
  -3  -5   0   17.03    0.56
   3  -5   0   17.54    0.57
  -3  -5   1    4.99    0.30
  -3  -5   2   72.20    1.73
  -3   5   3    3.58    0.31
   3   5   3    3.45    0.31
   3   5   4    0.58    0.27
  -3   5   4    0.93    0.29
   3  -5   5    0.65    0.21
  -3   5   5    0.53    0.30
  -3  -5   5    0.58    0.19
   3   5   5    0.69    0.29
  -3   5   5    0.25    0.18
   3   5   6   16.61    0.57
  -3  -5   6   17.05    0.58
   3  -5   6   18.38    0.62
  -3   5   6   17.22    0.58
   3   5   6   19.97    0.69
  -3   5   6   19.52    0.69
   3   5   7    1.14    0.34
   3   5   7    1.27    0.22
  -3   5   7    1.57    0.22
   3  -5   7    1.36    0.25
  -3  -5   7    1.82    0.24
  -3   5   7    1.42    0.36
   3   5   8   14.93    0.55
  -3  -5   8   14.93    0.57
   3  -5   8   16.50    0.61
  -3   5   8   15.66    0.43
  -3   5   8   15.65    0.57
  -3  -5   9    3.62    0.33
  -3   5   9    3.36    0.19
   3   5   9    3.26    0.30
  -3   5   9    2.81    0.31
   3  -5   9    3.69    0.34
  -3   5  10    8.00    0.31
   3   5  10    7.07    0.41
   3  -5  10    7.94    0.46
  -3  -5  10    6.71    0.43
  -3   5  10    8.03    0.44
  -3   5  11    2.29    0.21
  -3   5  11    1.75    0.30
  -3  -5  11    1.66    0.30
   3   5  11    1.74    0.30
   3  -5  11    1.84    0.35
   3   5  12    2.75    0.34
  -3   5  12    3.43    0.26
  -3  -5  12    3.32    0.37
  -3   5  12    3.47    0.36
  -3   5  13   -0.02    0.28
   3   5  13    0.24    0.27
  -3  -5  13    0.07    0.30
  -3   5  13    0.37    0.21
  -3   5  14    0.13    0.30
   3   5  14    0.65    0.30
  -3   5  14    0.19    0.23
  -3  -5  14    0.27    0.31
  -3   5  15    0.25    0.24
  -3   5  15   -0.08    0.30
  -3  -5  15   -0.06    0.31
  -3   5  16    0.02    0.25
  -3   5  16    0.04    0.32
  -3  -5  16    0.11    0.34
  -3   5  17    0.18    0.34
  -3  -5  17    0.79    0.37
  -3   5  17   -0.08    0.28
  -3   5  18    0.19    0.36
  -3  -5  18    0.12    0.38
  -3   5  19    0.13    0.40
  -3  -5  19   -0.23    0.41
  -3  -7 -18   -0.36    0.50
  -3  -7 -17    0.24    0.45
  -3  -7 -16    0.17    0.41
  -3  -7 -15    0.25    0.38
  -3  -7 -14    0.24    0.37
  -3  -7 -13    0.22    0.34
  -3  -7 -13   -0.07    0.30
  -3   7 -13    0.04    0.31
  -3  -7 -12    0.49    0.30
  -3   7 -12    0.75    0.31
  -3  -7 -12    0.40    0.33
  -3  -7 -11    0.36    0.29
  -3   7 -11    0.57    0.29
   3   7 -11    0.61    0.37
  -3  -7 -11   -0.30    0.32
   3   7 -10    4.78    0.45
  -3  -7 -10    4.77    0.42
  -3  -7 -10    6.29    0.40
   3  -7 -10    4.68    0.29
  -3   7 -10    6.47    0.40
  -3  -7  -9   -0.16    0.28
  -3   7  -9   -0.05    0.28
   3   7  -9    0.09    0.33
  -3  -7  -9    0.44    0.28
   3  -7  -9    0.40    0.18
  -3  -7  -8   13.51    0.56
  -3   7  -8   13.88    0.54
   3  -7  -8   12.61    0.43
  -3  -7  -8   13.89    0.53
  -3  -7  -7    3.75    0.31
   3  -7  -7    3.65    0.21
   3   7  -7    4.16    0.36
  -3  -7  -7    3.65    0.29
  -3   7  -7    4.05    0.30
  -3  -7  -6    2.53    0.27
   3  -7  -6    2.20    0.17
  -3   7  -6    2.64    0.25
  -3  -7  -6    2.63    0.24
  -3  -7  -5    3.48    0.28
   3  -7  -5    3.23    0.18
  -3  -7  -5    3.28    0.24
  -3   7  -5    3.21    0.24
   3  -7  -4    2.73    0.15
  -3   7  -4    2.78    0.21
   3   7  -4    3.43    0.30
  -3  -7  -4    2.84    0.27
  -3  -7  -4    3.09    0.22
  -3   7  -4    3.43    0.39
  -3   7  -3    2.74    0.36
  -3  -7  -3    2.19    0.36
  -3  -7  -3    1.91    0.23
  -3   7  -3    2.07    0.18
  -3  -7  -3    1.92    0.18
   3  -7  -3    1.94    0.35
  -3   7  -2   12.47    0.56
  -3  -7  -2   12.74    0.55
   3  -7  -2   13.49    0.56
   3  -7  -1    0.67    0.30
  -3  -7  -1    0.88    0.31
  -3   7  -1    1.45    0.32
  -3  -7   0    9.04    0.45
   3  -7   0    9.14    0.47
  -3  -7   0    8.94    0.47
  -3  -7   1    0.72    0.29
  -3  -7   2   12.67    0.53
  -3  -7   3    1.72    0.31
  -3  -7   4    2.96    0.23
  -3   7   4    2.86    0.22
   3   7   4    3.75    0.37
  -3   7   4    3.48    0.37
   3   7   5    3.60    0.38
  -3   7   5    3.62    0.39
  -3   7   5    3.62    0.25
  -3  -7   5    3.69    0.25
  -3   7   6    3.02    0.25
   3   7   6    3.33    0.40
  -3  -7   6    2.33    0.24
  -3   7   6    2.88    0.40
  -3  -7   7    3.99    0.30
  -3   7   7    3.88    0.29
   3   7   7    4.86    0.45
  -3   7   7    4.35    0.46
   3  -7   8   14.58    0.62
  -3   7   8   14.14    0.55
  -3  -7   8   14.18    0.57
   3   7   8   15.59    0.71
   3  -7   9    0.28    0.31
  -3   7   9   -0.14    0.24
  -3  -7   9    0.12    0.26
   3   7   9    0.80    0.44
   3   7  10    5.35    0.36
   3   7  10    5.64    0.57
  -3   7  10    6.40    0.59
   3  -7  10    5.72    0.46
  -3   7  10    5.83    0.38
  -3  -7  10    5.66    0.40
  -3   7  11    0.29    0.26
  -3   7  11    0.76    0.51
   3   7  11    0.41    0.25
   3   7  11    0.45    0.48
  -3  -7  11    0.67    0.28
   3  -7  11   -0.03    0.32
  -3   7  12    0.38    0.29
   3   7  12    0.77    0.27
  -3   7  12    0.69    0.51
   3   7  12    0.79    0.49
  -3  -7  12    0.56    0.30
   3   7  13    0.16    0.27
  -3   7  13    0.15    0.53
   3   7  13    0.45    0.49
  -3   7  13    0.22    0.29
  -3  -7  13    0.09    0.30
  -3  -7  14    0.24    0.31
   3   7  14    0.38    0.51
  -3   7  14    0.28    0.30
  -3   7  15    0.19    0.25
   3   7  15    0.65    0.54
  -3   7  15    0.32    0.31
  -3  -7  15   -0.29    0.32
  -3   7  16    0.04    0.27
   3   7  16    1.59    0.59
  -3   7  16    1.18    0.67
  -3   7  16    0.04    0.32
  -3  -7  16    0.51    0.37
  -3   7  17    0.11    0.36
  -3  -7  17   -0.02    0.37
   3   7  17    0.40    0.60
   3   7  18    0.61    0.66
  -3   7  18    0.07    0.38
  -3  -7  18    0.30    0.41
  -3  -9 -19    0.26    0.53
  -3  -9 -18   -0.22    0.51
  -3  -9 -17    0.21    0.50
  -3  -9 -16    0.23    0.46
  -3  -9 -15    0.02    0.41
  -3  -9 -14    0.42    0.37
  -3  -9 -13    0.07    0.30
  -3  -9 -13   -0.08    0.36
  -3   9 -13    0.10    0.32
   3   9 -13   -0.38    0.40
   3   9 -12   -0.03    0.38
  -3  -9 -12    0.35    0.29
  -3  -9 -12    0.08    0.34
  -3   9 -12   -0.16    0.29
  -3   9 -11    0.35    0.29
  -3  -9 -11    0.21    0.27
   3   9 -11   -0.36    0.37
  -3  -9 -11    0.22    0.30
   3  -9 -11    0.28    0.21
   3   9 -10    0.94    0.38
  -3  -9 -10    0.19    0.29
  -3  -9 -10    0.63    0.27
  -3   9 -10    0.24    0.28
   3  -9 -10    0.60    0.21
  -3  -9  -9    0.19    0.28
  -3  -9  -9    0.57    0.25
   3   9  -9    0.77    0.37
  -3   9  -9    0.79    0.27
   3  -9  -9    0.46    0.21
  -3  -9  -8    1.47    0.26
   3  -9  -8    0.84    0.22
   3   9  -8    1.48    0.38
  -3   9  -8    1.93    0.27
  -3  -9  -8    0.87    0.28
  -3   9  -7    1.53    0.25
  -3  -9  -7    1.75    0.30
   3  -9  -7    1.90    0.23
  -3  -9  -7    1.32    0.24
  -3  -9  -6    3.27    0.32
   3  -9  -6    2.71    0.22
   3   9  -6    3.79    0.38
  -3   9  -6    3.32    0.27
  -3  -9  -6    2.85    0.26
   3  -9  -5    1.70    0.18
  -3  -9  -5    1.79    0.21
  -3  -9  -5    2.12    0.29
   3   9  -5    1.74    0.33
  -3   9  -5    2.32    0.22
  -3  -9  -4    2.27    0.27
   3  -9  -4    2.84    0.41
  -3  -9  -4    1.55    0.19
  -3   9  -4    1.48    0.18
  -3  -9  -4    2.21    0.39
  -3  -9  -3    2.35    0.29
   3  -9  -3    3.61    0.41
  -3   9  -3    1.75    0.17
  -3  -9  -3    1.68    0.17
  -3  -9  -3    3.83    0.41
  -3   9  -2    4.58    0.42
  -3  -9  -2    3.01    0.18
  -3   9  -2    3.07    0.18
   3  -9  -2    5.44    0.44
  -3  -9  -2    4.50    0.41
  -3  -9  -1   -0.41    0.35
  -3  -9  -1    0.65    0.38
   3  -9  -1   -0.37    0.36
  -3  -9   0   16.29    0.69
  -3  -9   0   17.89    0.71
   3  -9   0   18.05    0.74
  -3  -9   1   -0.12    0.36
  -3  -9   1   -0.10    0.34
   3  -9   1   -0.28    0.41
   3  -9   1   -0.02    0.41
   3  -9   2    5.00    0.50
  -3  -9   2    4.26    0.42
  -3   9   3    1.63    0.17
  -3  -9   3    1.77    0.18
  -3  -9   4    1.73    0.19
  -3   9   4    1.48    0.19
  -3   9   5    1.84    0.21
  -3   9   5    2.16    0.43
  -3  -9   5    2.13    0.22
   3   9   5    1.57    0.39
   3   9   6    3.87    0.47
  -3  -9   6    2.81    0.26
  -3   9   6    3.12    0.45
  -3   9   6    2.73    0.25
   3   9   7    2.32    0.46
  -3   9   7    2.36    0.47
  -3  -9   7    1.65    0.25
  -3   9   7    2.28    0.25
   3   9   8    1.48    0.44
  -3   9   8    1.42    0.25
  -3  -9   8    1.43    0.25
  -3   9   8    2.03    0.48
  -3   9   9    0.86    0.25
  -3  -9   9    0.39    0.24
   3   9   9    0.26    0.43
  -3   9   9    0.49    0.47
  -3   9  10    0.72    0.46
   3   9  10    0.38    0.46
  -3   9  10    0.20    0.25
  -3  -9  10    0.28    0.26
   3   9  11    0.97    0.47
  -3   9  11    0.04    0.25
  -3  -9  11    0.09    0.26
  -3   9  11   -0.33    0.47
  -3   9  12   -0.13    0.50
   3   9  12   -0.14    0.48
  -3   9  12    0.02    0.26
  -3  -9  12    0.56    0.28
  -3   9  13    0.88    0.54
   3   9  13    1.02    0.52
  -3  -9  13    0.41    0.30
  -3   9  13    0.12    0.27
  -3   9  14    0.20    0.29
  -3  -9  14    0.18    0.31
   3   9  14    0.22    0.51
  -3   9  14    0.43    0.58
   3   9  15    0.68    0.55
  -3   9  15    0.74    0.34
  -3   9  15    0.25    0.58
  -3  -9  15    0.25    0.32
   3   9  16    0.78    0.60
  -3   9  16   -0.10    0.35
  -3  -9  16   -0.12    0.34
   3   9  17    0.72    0.65
  -3   9  17    0.04    0.37
  -3  -9  17    0.24    0.38
  -3   9  17    0.25    0.71
  -3  -9  18   -0.07    0.38
  -3   9  18    0.29    0.39
  -3 -11 -17    0.42    0.49
  -3 -11 -16    0.23    0.48
  -3 -11 -15    0.12    0.44
  -3 -11 -14    0.18    0.39
  -3  11 -13   -0.02    0.29
  -3 -11 -13    0.04    0.37
  -3  11 -12   -0.19    0.27
  -3 -11 -12    0.33    0.29
  -3 -11 -12   -0.04    0.34
  -3  11 -11    0.16    0.26
  -3 -11 -11    0.58    0.33
  -3 -11 -11    0.06    0.26
   3  11 -11    0.45    0.38
   3 -11 -11   -0.05    0.21
   3  11 -10    0.75    0.37
  -3 -11 -10    0.29    0.26
  -3 -11 -10    0.16    0.30
  -3  11 -10    0.11    0.24
   3 -11 -10    0.45    0.23
  -3 -11  -9    0.10    0.23
   3  11  -9    0.33    0.36
  -3  11  -9    0.04    0.23
   3 -11  -9   -0.03    0.22
  -3 -11  -9    0.41    0.28
  -3  11  -8   -0.02    0.21
  -3 -11  -8    0.09    0.22
   3  11  -8    0.51    0.36
  -3 -11  -8    0.14    0.27
   3 -11  -8    0.10    0.22
  -3 -11  -7    0.79    0.23
  -3  11  -7    0.94    0.22
  -3 -11  -7    1.24    0.30
   3 -11  -7    1.33    0.23
  -3  11  -6   -0.01    0.19
  -3 -11  -6    0.35    0.28
   3 -11  -6    0.08    0.19
  -3 -11  -6    0.35    0.20
   3 -11  -5    0.76    0.19
  -3 -11  -5    1.09    0.30
  -3 -11  -5    0.80    0.19
  -3  11  -5    0.69    0.17
  -3 -11  -4    0.07    0.28
  -3  11  -4    0.22    0.14
  -3 -11  -4    1.01    0.43
  -3 -11  -4    0.29    0.15
   3 -11  -4    1.39    0.44
  -3 -11  -3    1.20    0.44
  -3 -11  -3    0.31    0.13
  -3 -11  -3   -0.30    0.29
   3 -11  -3    1.37    0.43
  -3  11  -3    0.38    0.12
  -3 -11  -2    1.02    0.43
   3 -11  -2    0.14    0.41
  -3  11  -2    0.08    0.08
  -3 -11  -2    0.48    0.47
  -3 -11  -2    0.24    0.11
   3 -11  -1    0.77    0.45
  -3 -11  -1    0.15    0.06
  -3 -11  -1    0.39    0.47
  -3 -11  -1    0.67    0.42
   3 -11  -1    0.37    0.49
  -3 -11   0    0.67    0.43
  -3 -11   0    0.90    0.44
   3 -11   0    0.34    0.47
   3 -11   0    0.10    0.46
  -3 -11   1    0.62    0.43
   3 -11   1    1.12    0.51
  -3 -11   1    0.28    0.44
   3 -11   1    0.02    0.48
  -3 -11   2    0.87    0.43
   3 -11   2    0.61    0.55
  -3 -11   2    0.48    0.42
  -3  11   2    0.11    0.09
   3 -11   2   -0.04    0.47
  -3 -11   2    0.08    0.09
  -3 -11   3    0.45    0.42
  -3  11   3    0.02    0.12
  -3 -11   3    0.13    0.12
  -3 -11   4    0.11    0.14
  -3  11   4    0.05    0.14
  -3  11   5    0.74    0.17
  -3 -11   5    0.57    0.17
  -3  11   6    0.24    0.18
  -3 -11   6    0.49    0.19
  -3  11   7    0.77    0.21
  -3 -11   7    0.46    0.20
  -3  11   8    0.91    0.46
  -3  11   8    0.06    0.20
   3  11   8    0.18    0.44
  -3 -11   8    0.17    0.21
  -3  11   9    0.18    0.45
  -3 -11   9    0.08    0.21
   3  11   9    0.13    0.46
  -3  11   9    0.16    0.22
  -3  11  10    0.55    0.47
   3  11  10    0.25    0.48
  -3  11  10   -0.01    0.23
  -3 -11  10    0.15    0.23
  -3  11  11    0.20    0.48
  -3  11  11    0.07    0.24
  -3 -11  11    0.06    0.23
   3  11  11   -0.27    0.47
  -3  11  12    0.34    0.53
   3  11  12   -0.41    0.48
  -3  11  12    0.06    0.25
  -3 -11  12    0.24    0.24
  -3  11  13    0.45    0.28
  -3 -11  13   -0.13    0.24
  -3  11  13    1.09    0.56
   3  11  13    1.04    0.54
  -3  11  14    0.20    0.30
   3  11  14    0.26    0.55
  -3 -11  14    0.40    0.28
  -3  11  14    0.18    0.58
  -3  11  15   -0.16    0.64
  -3  11  15   -0.02    0.31
  -3 -11  15    0.39    0.30
   3  11  15    0.96    0.61
  -3 -11  16    0.50    0.33
  -3  11  16   -0.10    0.35
  -3  11  17    0.16    0.36
  -3 -11  17    0.10    0.31
  -3  11  18   -0.35    0.38
  -3 -13 -15    0.05    0.43
  -3 -13 -14    0.02    0.42
  -3 -13 -13   -0.25    0.40
  -3 -13 -12   -0.23    0.36
  -3 -13 -11    0.14    0.33
  -3 -13 -10    0.53    0.31
  -3 -13  -9    0.37    0.29
   3 -13  -9    0.60    0.25
  -3 -13  -8    0.11    0.28
   3 -13  -8    0.28    0.23
  -3 -13  -7    0.08    0.28
   3 -13  -7    0.13    0.21
  -3 -13  -6    0.37    0.30
   3 -13  -6    0.30    0.20
  -3 -13  -5    0.18    0.28
   3 -13  -5    0.16    0.19
   3 -13  -4    0.20    0.21
  -3 -13  -4    0.45    0.30
  -3 -13  -4    0.32    0.44
  -3 -13  -3    0.38    0.51
  -3 -13  -3    0.58    0.30
   3 -13  -3    0.91    0.49
   3 -13  -2    0.34    0.53
  -3 -13  -2   -0.22    0.50
  -3 -13  -1   -0.02    0.51
   3 -13  -1    1.66    0.59
  -3 -13   0    0.81    0.52
   3 -13   0   -0.37    0.55
  -3 -13   1    0.22    0.47
   3 -13   1    0.90    0.56
   3 -13   2    0.19    0.55
  -3 -13   2    0.26    0.46
  -3 -13   3    0.38    0.45
  -3 -13   7   -0.01    0.18
  -3  13   7    0.40    0.17
  -3  13   8   -0.08    0.18
  -3 -13   8    0.28    0.20
  -3 -13   9    0.42    0.21
  -3  13   9    0.28    0.21
  -3  13  10    0.16    0.21
  -3 -13  10    0.35    0.22
  -3  13  10    0.18    0.47
   3  13  10    0.89    0.48
  -3 -13  11    0.11    0.22
   3  13  11    0.42    0.50
  -3  13  11    0.11    0.23
  -3  13  11    0.03    0.51
  -3  13  12    0.11    0.57
   3  13  12    0.60    0.53
  -3  13  12    0.18    0.25
  -3  13  13   -0.39    0.60
  -3  13  13    0.45    0.28
   3  13  13   -0.06    0.57
  -3  13  14    0.10    0.30
  -3  13  15    0.21    0.31
  -3 -15 -12   -0.41    0.39
  -3 -15 -11   -0.21    0.35
  -3 -15 -10    0.17    0.36
  -3 -15  -9    0.19    0.32
  -3 -15  -8   -0.02    0.32
  -3 -15  -7   -0.19    0.32
   3 -15  -6   -0.09    0.34
  -3 -15  -6    0.28    0.41
  -3 -15  -6    0.40    0.32
   3 -15  -6    0.17    0.23
  -3 -15  -5    0.40    0.46
   3 -15  -5    0.83    0.41
   3 -15  -5    0.03    0.23
  -3 -15  -5    0.16    0.32
   3 -15  -4    0.37    0.46
  -3 -15  -4    0.23    0.51
  -3 -15  -4    0.20    0.33
   3 -15  -4    0.22    0.25
  -3 -15  -3   -0.15    0.53
  -3 -15  -3    0.29    0.33
  -3 -15  -2    0.15    0.56
   3 -15  -2   -0.13    0.55
  -3 -15  -1    0.28    0.58
   3 -15  -1    0.62    0.59
  -3 -15   0    0.17    0.53
   3 -15   0   -0.09    0.59
  -3 -15   1   -0.14    0.51
   3 -15   1    0.41    0.62
  -3 -15   2    1.00    0.50
   3 -15   2    0.23    0.59
  -3 -17  -9    0.63    0.39
  -3 -17  -8   -0.12    0.37
  -3 -17  -7   -0.08    0.37
  -3 -17  -6   -0.10    0.38
  -3 -17  -6    0.21    0.50
  -3 -17  -5    0.76    0.55
  -3 -17  -5    0.10    0.39
   3 -17  -4    0.21    0.50
  -3 -17  -4    0.27    0.37
  -3 -17  -4    0.73    0.58
  -3 -17  -3    0.43    0.38
  -3 -17  -3    0.40    0.61
   3 -17  -3    0.28    0.54
  -3 -17  -2   -0.28    0.36
  -3 -17  -2    0.55    0.63
   3 -17  -2    0.23    0.59
  -3 -17  -1   -0.08    0.60
   3 -17  -1    0.51    0.66
  -3 -17   0   -0.03    0.58
   3 -17   0    0.36    0.65
  -3 -17   1    0.38    0.54
   3 -17   1    0.70    0.70
  -3 -17   2   -0.05    0.52
  -4   0 -13    0.32    0.31
  -4   0 -12    8.11    0.48
  -4   0 -12    9.54    0.54
  -4   0 -11    0.21    0.28
  -4   0 -11    0.46    0.26
  -4   0 -10    8.92    0.47
  -4   0 -10    8.98    0.45
  -4   0  -9   -0.07    0.22
  -4   0  -9    0.07    0.21
  -4   0  -8    6.17    0.35
  -4   0  -8    4.98    0.34
  -4   0  -7   -0.01    0.19
  -4   0  -7    0.19    0.20
  -4   0  -6   27.68    0.81
   4   0  -2  262.70    5.85
  -4   0  -1    0.01    0.10
  -4   0   0  572.73   12.97
   4   0   0  574.08   12.98
  -4   0   0  613.46   13.00
   4   0   1   -0.02    0.10
  -4   0   1    0.01    0.08
   4   0   2  267.40    6.01
   4   0   3    0.27    0.12
   4   0   4  114.57    2.67
   4   0   5    0.11    0.16
   4   0   6   28.17    0.80
   4   0   7   -0.04    0.17
  -4   0   8    5.38    0.34
  -4   0   9   -0.01    0.21
  -4   0  10    9.15    0.47
  -4   0  10    8.59    0.38
  -4   0  11    0.23    0.26
  -4   0  11   -0.08    0.21
  -4   0  12    8.71    0.52
  -4   0  12    8.60    0.41
   4   0  12    9.13    0.49
  -4   0  13    0.30    0.30
   4   0  13    0.27    0.31
  -4   0  13   -0.12    0.24
  -4   0  14    0.59    0.31
  -4   0  14    0.72    0.26
  -4   0  15   -0.08    0.32
  -4   0  15    0.12    0.25
  -4   0  16    0.26    0.25
  -4   0  16    0.18    0.33
  -4   0  17    0.01    0.28
  -4   0  17   -0.21    0.35
  -4   0  18    0.55    0.37
  -4   0  19    0.08    0.36
  -4  -2 -15    0.32    0.36
  -4  -2 -14    0.12    0.34
  -4  -2 -13    4.37    0.41
  -4  -2 -13    4.33    0.44
  -4   2 -13    4.31    0.41
  -4  -2 -12    3.80    0.40
  -4  -2 -12    4.87    0.42
  -4   2 -12    4.26    0.39
  -4  -2 -11    0.43    0.26
  -4   2 -11    0.75    0.27
  -4  -2 -11    1.03    0.30
  -4  -2 -10   21.19    0.74
  -4  -2 -10   20.01    0.72
  -4   2 -10   19.54    0.71
  -4  -2  -9    0.89    0.24
  -4  -2  -9    0.97    0.25
  -4  -2  -8    0.48    0.21
  -4  -2  -8    0.90    0.23
  -4  -2  -7    4.72    0.31
  -4  -2  -7    3.82    0.29
  -4  -2  -6    5.38    0.31
  -4  -2  -6    5.06    0.30
  -4  -2  -5    9.57    0.39
  -4  -2  -4   12.66    0.44
  -4   2  -3   13.65    0.44
  -4   2  -2   68.86    1.61
   4  -2  -2   66.28    1.60
   4  -2  -1   50.14    1.14
  -4   2  -1   50.38    1.19
   4  -2  -1   47.81    1.20
  -4   2  -1   46.86    1.21
   4  -2   0  386.54    8.58
   4  -2   0  385.79    8.58
  -4   2   0  386.07    8.59
  -4   2   0  383.29    8.62
  -4  -2   0  383.34    8.57
   4  -2   1   47.79    1.14
  -4   2   1   47.27    1.11
   4   2   2   65.52    1.58
  -4   2   2   64.84    1.51
   4  -2   2   70.74    1.58
   4   2   2   67.41    1.56
  -4   2   2   66.05    1.56
   4   2   3   13.97    0.44
   4  -2   3   14.02    0.44
   4   2   4   11.67    0.41
   4  -2   4   11.69    0.41
   4   2   5    9.55    0.37
   4  -2   5    9.54    0.39
   4  -2   6    4.71    0.29
  -4   2   6    4.21    0.17
   4  -2   7    4.93    0.30
  -4  -2   7    4.28    0.31
  -4   2   7    4.30    0.19
   4  -2   8    0.72    0.22
  -4   2   8    0.92    0.14
  -4  -2   8    0.75    0.23
   4  -2   9    1.13    0.26
  -4   2   9    0.96    0.16
  -4  -2   9    0.51    0.23
   4  -2  10   21.21    0.73
  -4   2  10   21.66    0.61
   4   2  10   21.49    0.72
  -4  -2  10   19.58    0.74
  -4  -2  11    0.67    0.27
   4   2  11    0.88    0.28
  -4   2  11    0.81    0.20
  -4  -2  12    4.12    0.40
   4   2  12    4.83    0.39
  -4   2  12    4.93    0.31
  -4   2  13    5.00    0.32
  -4  -2  13    4.21    0.39
   4   2  13    5.08    0.41
  -4  -2  13    4.51    0.43
  -4  -2  14    0.41    0.32
  -4   2  14    0.19    0.23
  -4  -2  14    0.23    0.29
  -4  -2  15    0.22    0.29
  -4   2  15   -0.16    0.23
  -4  -2  15   -0.30    0.34
  -4  -2  16    0.21    0.34
  -4   2  16    0.29    0.24
  -4  -2  16   -0.15    0.30
  -4   2  17    0.18    0.25
  -4  -2  17   -0.14    0.34
  -4   2  18    0.26    0.28
  -4   2  18    0.10    0.36
  -4  -2  18    0.17    0.36
  -4   2  19    0.21    0.38
  -4  -2  19    0.39    0.37
  -4  -4 -17    0.10    0.40
  -4  -4 -16    0.40    0.40
  -4  -4 -15    0.22    0.37
  -4  -4 -14   -0.02    0.33
  -4  -4 -13    0.03    0.31
  -4   4 -13    0.05    0.32
  -4  -4 -13    0.50    0.35
  -4  -4 -12    1.17    0.34
  -4   4 -12    1.39    0.34
  -4  -4 -12    2.09    0.36
  -4   4 -11    2.85    0.36
  -4  -4 -11    3.39    0.37
  -4  -4 -11    3.18    0.36
  -4  -4 -10   27.74    0.90
  -4  -4 -10   26.54    0.89
  -4   4 -10   27.44    0.89
  -4  -4  -9    1.08    0.27
  -4   4  -9    0.75    0.25
  -4  -4  -9    0.38    0.27
  -4  -4  -8    8.23    0.42
  -4  -4  -8    7.99    0.41
  -4   4  -8    7.47    0.40
  -4  -4  -7    5.34    0.34
  -4  -4  -7    5.18    0.33
  -4   4  -7    5.30    0.33
  -4  -4  -6    7.98    0.38
  -4  -4  -6    7.64    0.37
  -4   4  -6    8.01    0.37
   4   4  -5   10.57    0.38
  -4  -4  -5   10.70    0.42
  -4   4  -4   18.78    0.68
  -4  -4  -4   20.52    0.63
   4   4  -4   20.09    0.54
  -4  -4  -3    3.89    0.26
  -4   4  -3    3.83    0.36
  -4   4  -2   21.25    0.68
  -4  -4  -2   22.13    0.63
   4  -4  -2   20.26    0.49
   4  -4  -2   21.78    0.66
   4  -4  -2   20.41    0.65
  -4  -4  -2   19.03    0.63
   4  -4  -1   50.00    1.30
   4  -4  -1   49.25    1.17
  -4  -4  -1   51.52    1.27
  -4   4  -1   49.58    1.29
  -4  -4  -1   48.67    1.25
   4  -4  -1   51.64    1.26
   4  -4   0  111.73    2.63
   4  -4   0  109.69    2.52
  -4   4   0  109.20    2.59
   4  -4   0  109.06    2.55
  -4  -4   0  109.95    2.56
  -4  -4   1   47.90    1.14
   4  -4   1   46.92    1.16
  -4  -4   2   19.59    0.56
   4  -4   2   20.97    0.60
  -4   4   2   21.35    0.63
   4   4   2   22.01    0.64
   4  -4   3    3.75    0.25
  -4   4   3    4.34    0.31
   4   4   3    3.63    0.30
   4  -4   4   21.43    0.64
  -4   4   4   20.78    0.66
   4   4   4   19.32    0.64
   4  -4   5   10.90    0.44
  -4   4   5   11.87    0.49
   4   4   5   11.15    0.48
   4   4   6    8.43    0.45
   4  -4   6    8.71    0.40
   4   4   7    5.07    0.32
  -4   4   7    5.53    0.17
   4  -4   7    5.26    0.34
  -4   4   7    5.28    0.34
  -4  -4   7    5.37    0.34
   4   4   8    8.17    0.40
  -4   4   8    8.72    0.43
  -4  -4   8    7.61    0.41
   4  -4   8    8.53    0.43
  -4   4   8    8.51    0.26
   4   4   9    0.96    0.26
  -4  -4   9    1.15    0.27
  -4   4   9    1.04    0.14
  -4   4   9    1.26    0.28
   4  -4   9    1.01    0.28
   4  -4  10   27.88    0.90
  -4   4  10   29.17    0.73
  -4   4  10   26.82    0.91
  -4  -4  10   26.33    0.91
   4   4  10   27.59    0.87
  -4   4  11    3.47    0.24
   4  -4  11    3.65    0.37
   4   4  11    2.76    0.34
  -4   4  11    2.71    0.35
  -4  -4  11    2.96    0.37
   4   4  12    1.61    0.32
  -4   4  12    1.95    0.22
  -4   4  12    1.18    0.32
  -4  -4  12    1.37    0.34
  -4   4  13   -0.02    0.31
  -4  -4  13    0.15    0.31
   4   4  13    0.28    0.30
  -4   4  13    0.35    0.21
  -4  -4  14    0.38    0.32
  -4   4  14    0.27    0.22
  -4   4  14    0.28    0.31
  -4   4  15    0.30    0.34
  -4  -4  15   -0.02    0.31
  -4   4  15    0.11    0.23
  -4   4  16    0.34    0.34
  -4  -4  16    0.37    0.35
  -4   4  16    0.72    0.25
  -4   4  17    0.29    0.26
  -4   4  17    0.17    0.35
  -4  -4  17    0.19    0.35
  -4   4  18    0.33    0.38
  -4  -4  18   -0.13    0.38
  -4   4  19    0.44    0.41
  -4  -4  19   -0.05    0.40
  -4  -6 -18    0.11    0.49
  -4  -6 -17    0.53    0.46
  -4  -6 -16    0.17    0.41
  -4  -6 -15   -0.11    0.38
  -4  -6 -14    0.52    0.37
  -4   6 -13    0.33    0.30
  -4  -6 -13    0.48    0.35
  -4   6 -12    0.29    0.30
  -4  -6 -12    0.81    0.35
  -4  -6 -12    0.51    0.32
  -4   6 -11   -0.41    0.32
  -4  -6 -11    0.03    0.31
  -4  -6 -11   -0.55    0.36
  -4   6 -10    0.33    0.31
  -4  -6 -10    0.20    0.29
  -4  -6 -10   -0.33    0.33
  -4  -6  -9    4.60    0.38
   4   6  -9    4.73    0.39
  -4  -6  -9    4.63    0.38
  -4   6  -9    3.92    0.35
  -4  -6  -8    1.76    0.29
   4   6  -8    1.36    0.31
  -4  -6  -8    1.17    0.27
  -4   6  -8    1.26    0.26
  -4  -6  -7    1.73    0.26
  -4   6  -7    1.40    0.25
   4   6  -7    2.20    0.30
  -4  -6  -7    2.00    0.28
  -4   6  -7    1.75    0.38
   4   6  -6   12.38    0.46
  -4  -6  -6   10.72    0.47
  -4  -6  -6   11.16    0.46
  -4   6  -6   11.05    0.45
  -4   6  -6   10.99    0.56
   4   6  -5    2.79    0.27
  -4   6  -5    2.21    0.37
  -4  -6  -5    2.59    0.28
  -4  -6  -5    2.75    0.26
  -4   6  -5    2.60    0.24
  -4   6  -4   10.40    0.52
  -4  -6  -4   10.77    0.45
  -4   6  -3   11.40    0.53
  -4  -6  -3   10.73    0.45
   4  -6  -3   10.99    0.54
   4  -6  -2   29.46    0.95
  -4  -6  -2   30.54    0.88
  -4   6  -2   30.83    0.93
   4  -6  -2   31.94    0.93
  -4  -6  -2   30.08    0.91
  -4  -6  -1   16.76    0.63
  -4   6  -1   17.93    0.65
   4  -6  -1   17.61    0.63
  -4  -6   0   35.13    0.99
   4  -6   0   35.31    0.99
  -4  -6   1   17.84    0.58
   4  -6   2   30.37    0.86
  -4  -6   2   31.74    0.86
  -4   6   3   11.26    0.50
   4  -6   3   11.00    0.44
   4   6   3   11.31    0.49
   4  -6   4   10.02    0.44
  -4   6   4   10.79    0.49
   4   6   4   10.79    0.50
   4   6   5    2.54    0.35
  -4   6   5    2.65    0.36
   4  -6   5    2.97    0.30
   4  -6   6   11.95    0.50
  -4   6   6   11.52    0.47
  -4  -6   6   12.18    0.48
  -4   6   6   12.98    0.58
  -4   6   7    1.66    0.38
  -4  -6   7    1.77    0.26
   4  -6   7    1.70    0.29
  -4   6   7    1.75    0.25
   4   6   7    2.46    0.38
  -4   6   8    1.25    0.41
   4   6   8    1.06    0.26
  -4   6   8    0.90    0.25
  -4  -6   8    1.11    0.27
   4  -6   8    0.30    0.29
  -4   6   9    4.85    0.38
   4   6   9    4.67    0.35
  -4  -6   9    4.78    0.38
   4  -6   9    5.56    0.42
  -4   6   9    6.03    0.58
   4   6   9    5.27    0.55
   4   6  10    0.83    0.28
  -4   6  10    0.12    0.28
  -4  -6  10    0.49    0.30
   4  -6  10    0.72    0.33
  -4   6  10    0.58    0.50
   4   6  10   -0.09    0.45
  -4  -6  11   -0.32    0.31
  -4   6  11   -0.24    0.30
   4   6  11    0.53    0.28
   4  -6  11    0.05    0.32
  -4   6  11   -0.22    0.52
   4   6  11    1.03    0.49
   4   6  12    0.57    0.28
  -4   6  12    0.53    0.31
  -4  -6  12    0.62    0.31
  -4   6  13   -0.15    0.29
  -4  -6  13   -0.21    0.30
  -4   6  13    0.09    0.19
   4   6  13   -0.08    0.29
  -4   6  14    0.44    0.33
  -4  -6  14    0.86    0.35
  -4   6  14    0.84    0.22
  -4  -6  15    0.29    0.35
  -4   6  15    0.30    0.24
  -4   6  15   -0.08    0.33
  -4   6  16    0.38    0.26
  -4   6  16    0.40    0.35
  -4  -6  16   -0.07    0.35
  -4   6  17    0.02    0.37
  -4  -6  17    0.15    0.38
  -4   6  18    0.22    0.40
  -4  -6  18   -0.03    0.40
  -4  -8 -19    0.36    0.56
  -4  -8 -18   -0.14    0.52
  -4  -8 -17    0.43    0.48
  -4  -8 -16    0.21    0.44
  -4  -8 -15   -0.05    0.40
   4   8 -14    0.51    0.39
  -4  -8 -14    0.11    0.37
   4   8 -13    0.43    0.39
  -4  -8 -13    0.56    0.36
  -4  -8 -12    0.20    0.29
   4   8 -12    0.30    0.37
  -4  -8 -12   -0.08    0.36
  -4   8 -12    0.08    0.29
  -4  -8 -11   -0.11    0.28
  -4   8 -11    0.42    0.29
   4   8 -11    0.51    0.35
  -4  -8 -11    0.35    0.32
  -4  -8 -10    0.12    0.29
   4   8 -10    0.35    0.35
  -4   8 -10   -0.50    0.29
  -4  -8 -10    0.10    0.31
  -4  -8  -9    2.54    0.34
  -4   8  -9    2.88    0.36
  -4  -8  -9    2.31    0.36
   4   8  -8    1.18    0.35
  -4  -8  -8    0.59    0.30
   4  -8  -8    0.09    0.14
  -4  -8  -8    0.54    0.28
  -4   8  -8    0.31    0.27
  -4   8  -7    7.67    0.54
   4   8  -7    7.16    0.42
  -4  -8  -7    6.73    0.41
  -4  -8  -7    6.39    0.37
  -4   8  -7    6.72    0.38
  -4  -8  -6    3.81    0.34
   4   8  -6    4.77    0.37
  -4  -8  -6    4.03    0.30
  -4   8  -6    3.92    0.29
  -4   8  -6    4.69    0.46
   4  -8  -5   -0.09    0.12
  -4   8  -5   -0.01    0.37
  -4  -8  -5    0.23    0.21
  -4   8  -5    0.47    0.20
  -4  -8  -5    0.16    0.24
  -4  -8  -4    2.88    0.31
   4  -8  -4    2.39    0.14
   4  -8  -4    2.90    0.41
  -4  -8  -4    2.55    0.24
  -4   8  -4    2.19    0.22
   4  -8  -3    0.54    0.35
  -4  -8  -3    0.76    0.36
  -4   8  -3    0.35    0.34
  -4  -8  -3    0.29    0.24
   4  -8  -2    4.79    0.42
  -4  -8  -2    5.26    0.43
  -4   8  -2    4.70    0.43
   4  -8  -1    0.01    0.33
  -4  -8  -1    0.46    0.34
  -4  -8   0    1.30    0.35
  -4  -8   0    1.95    0.34
   4  -8   0    1.39    0.36
  -4  -8   1    1.13    0.33
   4  -8   1    0.01    0.36
  -4  -8   1    0.33    0.33
  -4  -8   2    3.57    0.38
  -4  -8   3    0.27    0.32
  -4   8   5   -0.16    0.34
   4   8   5   -0.06    0.34
  -4  -8   5   -0.19    0.19
  -4   8   5    0.08    0.19
  -4  -8   6    3.70    0.30
  -4   8   6    5.20    0.47
  -4   8   6    3.84    0.30
   4  -8   6    3.65    0.37
   4   8   6    4.75    0.46
  -4   8   7    5.50    0.37
  -4  -8   7    5.96    0.39
   4  -8   7    7.16    0.47
  -4   8   7    7.87    0.55
   4   8   7    7.79    0.54
  -4   8   8    0.47    0.47
   4  -8   8    0.34    0.35
  -4   8   8    0.27    0.26
  -4  -8   8    0.53    0.29
   4   8   8    0.95    0.44
   4  -8   9    3.28    0.41
  -4   8   9    2.94    0.54
   4   8   9    4.00    0.52
  -4   8   9    2.61    0.34
  -4  -8   9    2.50    0.35
  -4   8  10    0.29    0.47
  -4   8  10    0.16    0.26
   4   8  10    0.63    0.46
  -4  -8  10   -0.19    0.29
   4  -8  10   -0.09    0.33
  -4   8  11    0.61    0.48
  -4  -8  11    0.38    0.29
  -4   8  11    0.15    0.26
   4   8  11    0.34    0.45
  -4  -8  12    0.56    0.31
  -4   8  12    0.37    0.28
   4   8  12    0.91    0.49
   4   8  13    0.78    0.50
  -4   8  13   -0.02    0.29
  -4  -8  13   -0.02    0.31
  -4   8  14    0.53    0.59
  -4  -8  14    0.20    0.32
   4   8  14    0.65    0.52
  -4   8  14   -0.06    0.30
   4   8  15    0.99    0.56
  -4   8  15    0.65    0.63
  -4   8  15    0.41    0.33
  -4  -8  15    0.31    0.35
   4   8  16    1.03    0.61
  -4   8  16    0.52    0.69
  -4   8  16    0.02    0.34
  -4  -8  16    0.15    0.37
  -4   8  17    0.34    0.77
   4   8  17    0.87    0.63
  -4  -8  17   -0.12    0.37
  -4   8  17    0.09    0.38
  -4   8  18    0.36    0.40
  -4  -8  18    0.22    0.41
  -4 -10 -18    0.17    0.52
  -4 -10 -17   -0.33    0.49
  -4 -10 -16    0.39    0.47
  -4 -10 -15    0.22    0.42
  -4 -10 -14   -0.02    0.38
   4  10 -13    0.19    0.39
  -4 -10 -13   -0.06    0.36
  -4  10 -12   -0.16    0.29
   4  10 -12   -0.10    0.37
  -4 -10 -12   -0.19    0.29
  -4 -10 -12   -0.14    0.35
   4  10 -11    0.41    0.36
  -4 -10 -11    0.07    0.32
  -4 -10 -11   -0.05    0.28
  -4  10 -11    0.36    0.28
   4  10 -10    0.97    0.35
  -4 -10 -10    0.59    0.27
  -4  10 -10    0.30    0.27
  -4 -10 -10    0.27    0.31
   4  10  -9    0.62    0.35
  -4 -10  -9    0.40    0.25
  -4  10  -9    0.30    0.25
  -4 -10  -9    0.18    0.29
   4 -10  -9    0.50    0.16
   4  10  -8    0.85    0.35
  -4  10  -8    0.93    0.25
  -4 -10  -8    1.10    0.31
   4 -10  -8    0.87    0.17
  -4 -10  -8    0.29    0.24
  -4  10  -7    1.34    0.25
  -4 -10  -7    0.86    0.30
   4 -10  -7    1.08    0.20
  -4 -10  -7    1.09    0.25
  -4 -10  -6    0.83    0.30
   4 -10  -6    1.02    0.19
  -4 -10  -6    0.80    0.23
  -4  10  -6    0.75    0.23
  -4  10  -5   -0.36    0.42
   4 -10  -5    0.30    0.16
  -4 -10  -5   -0.11    0.29
  -4 -10  -5    0.27    0.20
  -4  10  -5    0.21    0.20
  -4 -10  -4    0.95    0.30
  -4 -10  -4    0.77    0.20
  -4  10  -4    1.12    0.20
  -4  10  -3    1.72    0.43
  -4 -10  -3    1.35    0.30
  -4 -10  -3    1.87    0.21
  -4  10  -3    1.66    0.19
  -4  10  -2    0.31    0.14
  -4 -10  -2    1.16    0.41
   4 -10  -2    0.68    0.39
  -4 -10  -2    0.35    0.16
   4 -10  -1    1.40    0.42
  -4 -10  -1    1.15    0.41
  -4 -10  -1    0.96    0.40
  -4 -10   0   -0.31    0.39
   4 -10   0   -0.17    0.41
  -4 -10   0    0.01    0.38
   4 -10   1    1.33    0.48
  -4 -10   1    0.97    0.38
  -4 -10   1    0.58    0.40
   4 -10   2    0.36    0.49
  -4 -10   2    0.94    0.37
  -4 -10   3    1.38    0.18
  -4  10   3    1.22    0.18
  -4  10   4    1.22    0.20
  -4 -10   4    0.84    0.18
  -4  10   5    0.18    0.19
  -4 -10   5    0.37    0.19
  -4  10   6    1.00    0.23
  -4 -10   6    0.65    0.22
  -4  10   7    1.66    0.48
   4  10   7    1.35    0.44
  -4  10   7    1.42    0.25
  -4 -10   7    1.44    0.25
  -4  10   8    1.45    0.47
   4  10   8    0.69    0.45
  -4  10   8    0.99    0.25
  -4 -10   8    0.74    0.23
   4 -10   8    0.21    0.34
  -4  10   9    0.60    0.45
   4  10   9    0.41    0.45
  -4 -10   9    0.33    0.23
  -4  10   9    0.49    0.25
  -4 -10  10    0.45    0.26
  -4  10  10    0.53    0.26
  -4  10  10    0.80    0.49
   4  10  10    0.28    0.45
  -4 -10  11    0.20    0.26
  -4  10  11   -0.02    0.47
   4  10  11    0.84    0.48
  -4  10  11    0.09    0.26
  -4  10  12    0.50    0.51
   4  10  12    0.88    0.50
  -4  10  12    0.03    0.26
  -4 -10  12    0.09    0.26
  -4  10  13    0.98    0.56
  -4  10  13    0.14    0.28
  -4 -10  13   -0.05    0.26
   4  10  13    0.34    0.51
   4  10  14    0.46    0.54
  -4  10  14    0.45    0.59
  -4  10  14    0.18    0.30
  -4 -10  14    0.15    0.28
   4  10  15    0.11    0.55
  -4  10  15    0.02    0.32
  -4 -10  15    0.16    0.31
   4  10  16    0.54    0.62
  -4  10  16    0.31    0.67
  -4  10  16    0.53    0.37
  -4 -10  16    0.54    0.35
  -4  10  17   -0.04    0.37
  -4 -10  17    0.16    0.35
  -4 -12 -16    0.38    0.45
  -4 -12 -15    0.89    0.45
  -4 -12 -14    0.41    0.42
  -4 -12 -13   -0.39    0.41
  -4 -12 -12   -0.24    0.35
  -4  12 -12   -0.03    0.27
  -4 -12 -11    0.22    0.32
  -4  12 -11    0.06    0.25
   4  12 -10    0.49    0.37
  -4  12 -10    0.22    0.24
  -4 -12 -10    0.12    0.32
  -4 -12  -9   -0.01    0.25
  -4  12  -9    0.04    0.22
  -4 -12  -9    0.32    0.30
   4 -12  -9    0.38    0.18
  -4  12  -8    0.18    0.21
   4 -12  -8    0.83    0.32
  -4 -12  -8    0.30    0.31
   4 -12  -8    0.03    0.19
  -4 -12  -8    0.25    0.24
   4 -12  -7    0.39    0.34
  -4 -12  -7    0.13    0.30
   4 -12  -7    0.40    0.19
  -4 -12  -7    0.25    0.23
  -4  12  -7    0.14    0.20
  -4 -12  -6    0.39    0.29
   4 -12  -6    0.58    0.19
  -4 -12  -6    0.56    0.21
  -4  12  -6    0.48    0.19
  -4 -12  -5    0.08    0.19
   4 -12  -5    0.11    0.17
  -4  12  -5    0.13    0.17
  -4 -12  -5    0.21    0.30
  -4 -12  -4    0.44    0.30
  -4 -12  -4   -0.11    0.16
  -4  12  -4    0.01    0.14
   4 -12  -4    0.88    0.46
  -4 -12  -4    1.38    0.46
  -4 -12  -3    0.21    0.15
  -4  12  -3    0.13    0.12
  -4 -12  -3    0.33    0.46
  -4 -12  -3    0.16    0.30
   4 -12  -3    0.71    0.45
   4 -12  -2    0.44    0.45
  -4 -12  -2    0.02    0.46
  -4 -12  -2    0.02    0.14
  -4  12  -2    0.02    0.11
  -4 -12  -2    0.68    0.44
   4 -12  -1    0.58    0.47
  -4 -12  -1    0.18    0.44
  -4 -12  -1   -0.11    0.43
  -4 -12  -1    0.11    0.12
  -4  12  -1    0.16    0.09
   4 -12   0    0.83    0.54
  -4 -12   0    1.25    0.47
  -4 -12   0    0.40    0.12
  -4  12   0    0.33    0.08
  -4 -12   0    1.09    0.46
  -4 -12   1    0.39    0.45
  -4  12   1    0.13    0.10
  -4 -12   1    0.51    0.42
   4 -12   1    0.05    0.53
   4 -12   1    0.42    0.51
  -4 -12   1    0.14    0.09
  -4 -12   2    0.58    0.44
  -4  12   2    0.07    0.12
  -4 -12   2    0.13    0.11
  -4 -12   2    0.23    0.42
   4 -12   2    0.07    0.51
   4 -12   2    0.54    0.58
  -4  12   3    0.21    0.13
  -4 -12   3    0.97    0.43
   4 -12   3    0.68    0.59
  -4 -12   3    0.40    0.12
  -4 -12   3    0.07    0.41
  -4 -12   4   -0.05    0.14
  -4  12   4    0.06    0.15
  -4 -12   5    0.13    0.15
  -4  12   5    0.19    0.17
  -4 -12   6    0.47    0.17
  -4  12   6    0.55    0.19
  -4  12   7    0.07    0.19
  -4 -12   7   -0.01    0.17
  -4  12   8    0.17    0.20
  -4 -12   8   -0.10    0.18
  -4  12   9    0.16    0.45
   4  12   9    0.45    0.44
  -4  12   9    0.41    0.23
  -4 -12   9   -0.02    0.19
  -4  12  10   -0.02    0.47
   4  12  10    0.38    0.46
  -4  12  10    0.31    0.23
  -4 -12  10   -0.09    0.20
  -4  12  11   -0.23    0.50
   4  12  11    0.55    0.48
  -4  12  11    0.26    0.25
  -4 -12  11    0.14    0.20
  -4  12  12   -0.22    0.54
   4  12  12    0.16    0.50
  -4  12  12    0.06    0.26
  -4 -12  12   -0.08    0.22
  -4  12  13    0.52    0.57
   4  12  13    0.14    0.53
  -4  12  13    0.32    0.29
  -4 -12  13   -0.06    0.24
  -4  12  14    0.25    0.61
   4  12  14   -0.11    0.58
  -4  12  14    0.15    0.31
  -4 -12  14    0.51    0.25
  -4  12  15   -0.04    0.33
  -4  12  16    0.21    0.35
  -4  12  17   -0.28    0.36
  -4 -14 -14   -0.41    0.43
  -4 -14 -13    0.23    0.40
  -4 -14 -12   -0.02    0.38
  -4 -14 -11    0.14    0.36
  -4 -14 -10    0.13    0.34
   4 -14 -10   -0.16    0.27
   4 -14  -9    0.57    0.30
  -4 -14  -9   -0.02    0.30
  -4 -14  -8    0.07    0.31
  -4 -14  -7   -0.02    0.31
  -4 -14  -6   -0.39    0.32
   4 -14  -6    0.21    0.20
   4 -14  -5    0.39    0.20
  -4 -14  -5   -0.11    0.31
  -4 -14  -5    0.29    0.46
  -4 -14  -4    0.80    0.48
  -4 -14  -4    0.11    0.32
   4 -14  -4   -0.01    0.20
  -4 -14  -3    0.18    0.49
  -4 -14  -3    0.35    0.32
  -4 -14  -2    0.02    0.33
  -4 -14  -2    0.41    0.50
  -4 -14  -1    0.58    0.48
   4 -14  -1   -0.03    0.56
  -4 -14   0   -0.12    0.43
   4 -14   0    0.03    0.58
  -4 -14   1    0.71    0.44
   4 -14   1   -0.33    0.57
  -4 -14   2    0.21    0.42
  -4  14   6    0.25    0.13
  -4  14   7    0.37    0.16
  -4  14   8    0.22    0.18
  -4  14   9    0.22    0.20
  -4  14  10    0.48    0.23
  -4  14  11    0.13    0.24
  -4 -16 -11   -0.56    0.40
  -4 -16 -10    0.16    0.39
  -4 -16  -9    0.22    0.38
  -4 -16  -8    0.69    0.56
  -4 -16  -8    0.28    0.37
  -4 -16  -7    0.47    0.52
  -4 -16  -7    0.12    0.37
  -4 -16  -6    0.81    0.54
  -4 -16  -6    0.06    0.36
  -4 -16  -5    1.09    0.54
  -4 -16  -5   -0.33    0.37
  -4 -16  -4    1.05    0.56
  -4 -16  -4    0.24    0.36
  -4 -16  -3    0.49    0.54
   4 -16  -3    0.03    0.54
  -4 -16  -3    0.25    0.36
  -4 -16  -2    0.89    0.37
  -4 -16  -2   -0.79    0.54
   4 -16  -2   -0.14    0.59
  -4 -16  -1   -0.20    0.49
   4 -16  -1    0.16    0.62
  -4 -16   0    0.44    0.46
   4 -16   0   -0.03    0.62
  -4 -16   1   -0.66    0.46
   4 -16   1   -0.22    0.63
  -4 -16   2    0.18    0.43
  -4 -18  -3    0.18    0.57
  -4 -18  -2   -0.34    0.54
  -4 -18  -1    0.16    0.51
  -4 -18   0    0.15    0.49
  -4 -18   1   -0.18    0.46
  -5  -1 -14   -0.08    0.35
  -5  -1 -13    2.35    0.39
  -5  -1 -12    9.09    0.55
  -5  -1 -12    8.37    0.51
  -5   1 -11    0.54    0.30
  -5  -1 -11    0.65    0.29
  -5  -1 -11    0.24    0.29
  -5  -1 -10    2.51    0.31
  -5   1 -10    2.55    0.33
  -5  -1 -10    2.57    0.34
  -5   1  -9    0.57    0.26
  -5  -1  -9    0.11    0.23
  -5  -1  -9    0.60    0.25
  -5  -1  -8    4.81    0.34
  -5  -1  -8    3.78    0.32
  -5  -1  -7    0.52    0.21
  -5  -1  -7    0.52    0.21
  -5   1  -4   27.96    0.80
   5  -1  -3   20.21    0.57
  -5   1  -3   22.55    0.64
  -5   1  -2   40.35    1.01
   5  -1  -2   38.30    0.96
  -5   1  -1    7.10    0.29
  -5   1  -1    6.44    0.31
  -5   1   0    3.68    0.23
   5  -1   0    3.25    0.17
  -5  -1   0    3.41    0.20
  -5   1   0    3.50    0.19
   5   1   1    6.84    0.28
  -5  -1   1    7.71    0.28
  -5   1   1    7.27    0.25
   5  -1   1    7.23    0.27
   5   1   2   39.17    0.93
  -5   1   2   37.94    0.87
   5  -1   2   37.82    0.92
  -5   1   2   34.38    0.87
   5   1   2   33.29    0.86
  -5   1   3   20.63    0.53
   5   1   3   20.90    0.61
   5  -1   3   21.94    0.61
   5   1   4   26.48    0.76
   5  -1   4   27.72    0.76
   5   1   5   14.36    0.50
   5  -1   5   15.59    0.51
   5   1   6   20.52    0.64
   5  -1   6   19.59    0.63
   5   1   7    0.57    0.20
   5  -1   7    0.63    0.21
   5   1   8    4.40    0.30
   5  -1   8    4.24    0.31
  -5  -1   9    0.50    0.24
  -5   1   9    0.24    0.15
   5  -1   9    0.39    0.23
  -5  -1  10    2.04    0.31
  -5   1  10    2.10    0.21
   5  -1  10    2.36    0.30
  -5  -1  11    0.53    0.30
  -5   1  11    0.63    0.20
   5   1  12    8.44    0.48
  -5   1  12    8.38    0.38
  -5  -1  12    8.27    0.53
  -5  -1  12    8.36    0.43
   5   1  13    1.91    0.34
  -5  -1  13    1.88    0.31
  -5   1  13    1.87    0.26
  -5  -1  13    1.67    0.37
  -5  -1  14    0.45    0.34
  -5  -1  14    0.89    0.27
  -5   1  14    0.68    0.23
  -5  -1  15    0.31    0.32
  -5   1  15    0.35    0.24
  -5  -1  15    0.04    0.26
  -5   1  16   -0.05    0.25
  -5  -1  16   -0.44    0.27
  -5  -1  16   -0.12    0.33
  -5  -1  17   -0.35    0.38
  -5   1  17   -0.04    0.26
  -5  -1  17    0.15    0.27
  -5  -1  18    0.03    0.38
  -5  -3 -17    0.15    0.40
  -5  -3 -16    0.14    0.38
  -5  -3 -15    0.41    0.36
  -5  -3 -14    0.34    0.35
  -5  -3 -13    0.80    0.36
  -5  -3 -12    0.32    0.32
  -5   3 -12    0.64    0.33
  -5  -3 -12    0.57    0.34
  -5  -3 -11    5.02    0.43
  -5  -3 -11    4.82    0.41
  -5   3 -11    4.32    0.39
  -5  -3 -10    0.65    0.28
  -5   3 -10    0.77    0.29
  -5  -3 -10    0.92    0.29
  -5  -3  -9    4.41    0.37
  -5  -3  -9    3.78    0.36
  -5   3  -9    4.42    0.35
  -5  -3  -8    9.50    0.48
  -5  -3  -8    9.21    0.46
  -5   3  -8    9.19    0.45
  -5   3  -7    1.15    0.24
  -5  -3  -7    1.13    0.23
  -5  -3  -7    1.14    0.24
  -5  -3  -6    4.41    0.31
   5   3  -5    6.52    0.26
  -5   3  -5    7.01    0.36
  -5   3  -4    2.04    0.23
   5   3  -4    1.84    0.13
   5  -3  -3    5.71    0.35
  -5   3  -3    6.43    0.31
  -5   3  -2   11.68    0.52
   5  -3  -2   13.02    0.49
  -5   3  -2   12.97    0.44
   5  -3  -1   14.69    0.54
  -5   3  -1   13.09    0.43
  -5   3  -1   13.85    0.52
   5  -3  -1   14.20    0.37
   5  -3  -1   11.16    0.44
  -5  -3  -1   11.04    0.43
  -5   3   0  111.04    2.60
   5  -3   0  110.69    2.54
   5  -3   0  111.45    2.56
  -5   3   0  109.87    2.55
  -5  -3   0  111.62    2.55
  -5  -3   1   13.28    0.35
  -5   3   1   12.77    0.38
   5  -3   1   13.59    0.42
   5  -3   2   12.42    0.41
  -5   3   2   12.64    0.42
   5   3   2   12.79    0.42
   5   3   3    5.90    0.29
  -5   3   3    6.10    0.32
   5  -3   3    5.94    0.29
   5   3   3    5.40    0.31
   5   3   4    1.36    0.25
   5   3   4    2.00    0.21
  -5   3   4    1.59    0.26
   5  -3   4    1.95    0.23
   5   3   5    7.81    0.35
   5  -3   5    7.15    0.35
   5   3   6    3.36    0.27
   5  -3   6    4.42    0.30
  -5   3   7    0.93    0.09
   5  -3   7    1.36    0.24
  -5   3   8    9.03    0.28
   5  -3   8   10.16    0.46
  -5  -3   8    9.16    0.47
  -5   3   8    8.52    0.46
  -5  -3   9    4.14    0.37
  -5   3   9    4.43    0.21
   5  -3   9    4.67    0.36
  -5   3   9    4.82    0.38
   5   3  10    0.92    0.29
  -5  -3  10    0.47    0.29
  -5   3  10    0.85    0.17
   5  -3  10    0.76    0.30
  -5   3  10    0.90    0.31
  -5   3  11    4.94    0.44
  -5   3  11    5.07    0.27
   5  -3  11    5.99    0.42
  -5  -3  11    5.36    0.44
   5   3  11    4.90    0.40
  -5   3  12    0.63    0.34
  -5  -3  12    0.38    0.33
   5   3  12    0.04    0.30
  -5   3  12    0.12    0.20
   5  -3  12    0.29    0.33
  -5   3  13    1.48    0.24
  -5   3  13    1.14    0.37
  -5  -3  13    0.75    0.36
  -5   3  14    0.55    0.34
  -5  -3  14    0.53    0.34
  -5   3  14    0.73    0.23
  -5  -3  15   -0.02    0.30
  -5   3  15    0.20    0.33
  -5  -3  15    0.02    0.33
  -5   3  15    0.34    0.23
  -5   3  16   -0.16    0.34
  -5  -3  16   -0.05    0.34
  -5   3  16   -0.07    0.23
  -5   3  17    0.03    0.37
  -5  -3  17    0.18    0.38
  -5   3  17    0.36    0.27
  -5   3  18   -0.13    0.39
  -5  -3  18   -0.24    0.39
  -5  -5 -18   -0.03    0.46
  -5  -5 -17    0.08    0.43
  -5  -5 -16    0.02    0.40
  -5  -5 -15    0.16    0.36
  -5  -5 -14    0.59    0.37
  -5  -5 -13   -0.16    0.34
  -5   5 -12    1.40    0.38
  -5  -5 -12    1.56    0.37
  -5  -5 -12    2.26    0.38
  -5  -5 -11    1.60    0.36
  -5  -5 -11    1.88    0.36
  -5   5 -11    1.62    0.36
  -5  -5 -10    8.10    0.48
  -5   5 -10    7.49    0.47
  -5  -5  -9    3.12    0.38
  -5  -5  -9    3.73    0.38
  -5   5  -9    3.89    0.37
   5   5  -8   20.71    0.64
  -5  -5  -8   20.59    0.73
  -5  -5  -8   19.96    0.73
  -5   5  -8   20.08    0.72
   5   5  -7    7.25    0.34
  -5  -5  -7    7.13    0.40
  -5  -5  -7    6.31    0.39
  -5   5  -7    6.76    0.40
   5   5  -6    6.10    0.30
  -5  -5  -6    5.77    0.36
   5   5  -5    1.45    0.20
  -5  -5  -5    0.94    0.24
  -5   5  -5    1.43    0.37
  -5   5  -4   11.25    0.55
  -5  -5  -4   11.61    0.48
   5  -5  -4   10.69    0.52
   5  -5  -3    3.25    0.38
  -5   5  -3    3.11    0.39
  -5  -5  -3    3.18    0.29
  -5  -5  -2    0.90    0.24
   5  -5  -2    0.66    0.34
  -5   5  -2    1.13    0.34
  -5  -5  -2    0.37    0.30
   5  -5  -2    0.32    0.10
   5  -5  -2    0.06    0.33
   5  -5  -1   35.21    1.03
   5  -5  -1   33.63    0.85
  -5   5  -1   34.19    1.01
   5  -5  -1   36.88    0.98
  -5  -5  -1   35.16    0.96
  -5   5   0   35.49    1.01
   5  -5   0   36.25    1.08
   5  -5   0   35.62    0.90
   5  -5   0   36.07    0.98
  -5  -5   0   35.61    0.98
   5  -5   1   35.31    0.91
  -5  -5   1   34.11    0.88
  -5  -5   2    0.18    0.22
   5  -5   2    0.26    0.20
   5  -5   3    3.45    0.28
  -5   5   3    3.99    0.33
   5   5   3    3.62    0.33
   5  -5   4   11.94    0.48
  -5   5   4   13.06    0.52
   5   5   4   12.20    0.51
   5   5   5    1.72    0.31
  -5   5   5    1.06    0.32
   5  -5   5    1.51    0.25
   5  -5   6    5.28    0.36
  -5   5   6    6.08    0.43
   5   5   6    5.98    0.41
   5  -5   7    8.01    0.43
  -5   5   7    8.13    0.53
   5   5   7    8.27    0.50
   5   5   8   19.96    0.70
  -5   5   8   20.44    0.75
   5  -5   8   22.51    0.75
  -5  -5   8   20.49    0.75
  -5   5   8   22.23    0.84
   5   5   8   21.34    0.80
   5   5   9    3.85    0.35
  -5   5   9    4.13    0.38
  -5  -5   9    3.33    0.38
   5  -5   9    4.39    0.39
   5   5   9    3.85    0.48
  -5   5  10    7.17    0.48
  -5  -5  10    6.74    0.47
   5   5  10    8.13    0.45
   5  -5  10    8.90    0.50
  -5   5  11    1.73    0.17
  -5   5  11    1.49    0.36
  -5  -5  11    1.32    0.35
   5   5  11    1.55    0.32
   5  -5  11    1.84    0.35
  -5   5  12    1.97    0.20
   5   5  12    2.08    0.35
  -5   5  12    1.44    0.35
  -5  -5  12    1.75    0.37
  -5   5  13    0.26    0.19
  -5   5  13    0.56    0.33
  -5  -5  13    0.35    0.33
  -5   5  14    0.74    0.21
  -5   5  14    0.73    0.34
  -5  -5  14    0.47    0.33
  -5   5  15    0.55    0.34
  -5  -5  15    0.79    0.36
  -5   5  15    0.40    0.23
  -5  -5  16    0.20    0.38
  -5   5  16   -0.53    0.38
  -5   5  16   -0.01    0.24
  -5   5  17    0.05    0.38
  -5  -5  17   -0.13    0.39
  -5   5  18    0.10    0.40
  -5  -5  18    0.45    0.45
  -5  -7 -18    0.52    0.52
  -5  -7 -17    0.16    0.45
  -5  -7 -16    0.64    0.43
   5   7 -15    0.05    0.39
  -5  -7 -15    0.24    0.40
   5   7 -14    0.33    0.36
  -5  -7 -14    0.29    0.37
   5   7 -13    0.07    0.35
  -5  -7 -13    0.63    0.36
  -5  -7 -12    0.73    0.34
  -5   7 -12    0.26    0.32
   5   7 -12   -0.06    0.33
  -5  -7 -12    0.46    0.35
  -5  -7 -11    0.29    0.32
   5   7 -11    0.31    0.34
  -5  -7 -11    0.35    0.34
  -5   7 -11    0.28    0.31
   5   7 -10    5.87    0.42
  -5  -7 -10    4.91    0.44
  -5   7 -10    6.07    0.62
  -5  -7 -10    5.16    0.43
  -5   7 -10    4.89    0.43
   5   7  -9    3.11    0.37
  -5  -7  -9    2.77    0.39
  -5  -7  -9    2.91    0.37
  -5   7  -9    2.50    0.35
  -5   7  -9    3.51    0.57
  -5  -7  -8    9.71    0.53
   5   7  -8   11.00    0.49
  -5   7  -8    9.72    0.67
  -5  -7  -8    9.57    0.51
  -5   7  -8    9.90    0.50
   5   7  -7    1.76    0.31
  -5   7  -7    1.76    0.30
  -5  -7  -7    2.00    0.32
  -5  -7  -7    1.26    0.33
  -5   7  -7    1.28    0.47
   5   7  -6    3.72    0.31
  -5   7  -6    3.81    0.48
  -5  -7  -6    4.03    0.34
  -5   7  -6    4.14    0.33
  -5  -7  -6    3.78    0.36
  -5   7  -5    6.28    0.48
  -5  -7  -5    5.30    0.38
   5  -7  -5    5.77    0.48
  -5   7  -4   13.42    0.61
  -5  -7  -4   11.71    0.53
   5  -7  -4   13.03    0.62
   5  -7  -3    1.40    0.40
  -5   7  -3    1.85    0.39
  -5  -7  -3    1.82    0.29
   5  -7  -3    1.05    0.13
  -5   7  -2   12.60    0.59
  -5  -7  -2   12.34    0.57
   5  -7  -2   12.60    0.61
  -5  -7  -2   11.84    0.50
   5  -7  -2   13.38    0.59
  -5   7  -1   10.41    0.54
   5  -7  -1   11.17    0.60
   5  -7  -1   10.53    0.38
   5  -7  -1   10.29    0.52
  -5  -7  -1   10.43    0.52
   5  -7   0   17.43    0.74
  -5  -7   0   16.17    0.59
   5  -7   0   16.48    0.53
   5  -7   0   16.72    0.64
  -5  -7   0   16.97    0.65
   5  -7   1   11.43    0.63
  -5  -7   1   11.13    0.46
   5  -7   1   10.96    0.43
   5  -7   1   10.79    0.55
  -5  -7   1   10.80    0.53
  -5  -7   2   12.35    0.49
   5  -7   2   11.78    0.47
   5  -7   3    0.92    0.25
   5  -7   4   12.92    0.51
  -5   7   4   12.53    0.58
   5  -7   5    5.71    0.38
  -5   7   5    5.96    0.45
   5   7   5    5.30    0.45
  -5   7   6    4.42    0.46
   5   7   6    3.22    0.43
   5  -7   6    3.60    0.35
  -5   7   7    1.20    0.44
   5   7   7    1.63    0.42
  -5   7   7    1.11    0.28
  -5  -7   7    1.21    0.29
   5  -7   7    1.68    0.33
  -5  -7   8   10.00    0.52
   5  -7   8   11.17    0.56
  -5   7   8   11.44    0.66
   5   7   8   10.27    0.62
  -5   7   9    3.58    0.55
   5   7   9    2.87    0.51
  -5   7   9    2.86    0.36
   5  -7   9    3.79    0.41
  -5  -7  10    5.39    0.44
   5  -7  10    5.61    0.46
  -5   7  10    5.56    0.44
  -5   7  10    5.96    0.61
   5   7  10    5.81    0.55
   5   7  11   -0.30    0.46
   5   7  11    0.39    0.29
  -5   7  11   -0.36    0.50
  -5   7  11   -0.07    0.30
  -5  -7  11    0.48    0.32
   5   7  12    0.86    0.49
  -5   7  12    1.26    0.56
  -5   7  12    0.20    0.31
  -5  -7  12    0.49    0.33
  -5   7  13    0.59    0.59
  -5   7  13    0.14    0.30
  -5  -7  13    0.30    0.30
   5   7  13    1.02    0.51
  -5   7  14    1.18    0.61
   5   7  14    1.51    0.53
  -5   7  14    0.04    0.31
  -5  -7  14   -0.17    0.33
  -5   7  15    0.86    0.65
  -5   7  15   -0.11    0.34
  -5  -7  15    0.32    0.37
   5   7  15    1.55    0.57
  -5   7  16   -0.35    0.37
   5   7  16    0.72    0.56
  -5  -7  16    0.41    0.38
  -5   7  16    0.93    0.71
  -5   7  17    1.23    0.82
   5   7  17    0.81    0.61
  -5   7  17    0.02    0.39
  -5  -7  17   -0.07    0.39
   5   7  18    0.78    0.63
  -5   7  18    0.25    0.41
  -5  -7  18    0.21    0.44
  -5  -9 -17    0.25    0.49
  -5  -9 -16    0.03    0.46
  -5  -9 -15    1.04    0.44
   5   9 -14    0.04    0.37
  -5  -9 -14   -0.40    0.39
   5   9 -13   -0.04    0.35
  -5  -9 -13    0.15    0.36
  -5   9 -12    0.59    0.30
   5   9 -12    0.15    0.34
  -5  -9 -12    0.08    0.35
  -5  -9 -11    0.40    0.30
  -5   9 -11    0.24    0.29
   5   9 -11    0.21    0.32
  -5  -9 -11    0.23    0.33
  -5  -9 -10    0.05    0.29
  -5   9 -10    0.19    0.29
   5   9 -10    0.73    0.32
  -5  -9 -10    0.18    0.32
   5   9  -9    0.67    0.33
  -5  -9  -9    0.68    0.33
  -5  -9  -9    0.35    0.29
  -5   9  -9    0.53    0.28
   5   9  -8    0.66    0.33
  -5  -9  -8    0.50    0.32
  -5  -9  -8    0.39    0.28
  -5   9  -8    0.46    0.27
  -5   9  -7    3.56    0.52
  -5  -9  -7    2.96    0.37
  -5  -9  -7    3.06    0.34
  -5   9  -7    2.87    0.32
  -5   9  -6    1.26    0.46
  -5  -9  -6    1.40    0.29
  -5  -9  -6    2.03    0.35
  -5   9  -6    1.24    0.27
  -5  -9  -5    1.74    0.33
  -5  -9  -5    1.69    0.29
  -5   9  -5    1.16    0.25
  -5   9  -5    1.90    0.46
   5  -9  -5    1.34    0.14
  -5  -9  -4    0.23    0.23
   5  -9  -4   -0.05    0.11
  -5   9  -4   -0.36    0.41
  -5  -9  -4    0.09    0.29
  -5   9  -4   -0.03    0.20
  -5  -9  -3    0.33    0.38
  -5   9  -3   -0.12    0.40
  -5  -9  -3    0.04    0.28
   5  -9  -3    0.24    0.44
   5  -9  -3    0.68    0.38
  -5   9  -2    4.45    0.45
   5  -9  -2    4.34    0.53
  -5  -9  -2    3.56    0.36
   5  -9  -2    4.57    0.45
  -5  -9  -2    3.95    0.43
   5  -9  -1    0.85    0.37
  -5  -9  -1    0.24    0.36
  -5  -9  -1    1.38    0.35
   5  -9  -1    0.73    0.46
  -5  -9   0    7.34    0.45
   5  -9   0    6.48    0.50
  -5  -9   0    7.41    0.50
   5  -9   1    0.11    0.41
  -5  -9   1    0.54    0.32
  -5  -9   1    0.56    0.38
  -5  -9   2    4.46    0.40
   5  -9   3    0.33    0.26
  -5  -9   3    0.31    0.33
   5  -9   4    0.39    0.28
   5  -9   5    2.50    0.35
  -5   9   5    1.35    0.27
   5  -9   6    1.52    0.35
  -5   9   6    1.55    0.47
  -5   9   6    1.63    0.29
  -5  -9   6    1.20    0.25
   5   9   6    1.15    0.45
   5  -9   7    3.29    0.41
  -5   9   7    3.42    0.51
  -5   9   7    2.16    0.30
  -5  -9   7    2.27    0.30
   5   9   7    3.07    0.50
   5   9   8   -0.18    0.43
  -5  -9   8    0.64    0.26
  -5   9   8    0.82    0.27
  -5   9   8    0.06    0.44
   5  -9   8    0.47    0.33
  -5   9   9    0.77    0.47
   5   9   9    0.59    0.44
  -5   9   9    0.47    0.27
  -5  -9   9    0.34    0.26
   5  -9   9    0.69    0.34
   5   9  10    0.78    0.46
  -5   9  10    0.29    0.47
  -5   9  10    0.40    0.28
  -5  -9  10    0.03    0.26
  -5   9  11    0.19    0.49
   5   9  11    0.31    0.46
  -5   9  11    0.08    0.27
  -5  -9  11    0.08    0.27
   5   9  12    0.60    0.48
  -5   9  12   -0.07    0.28
  -5  -9  12    0.12    0.28
  -5   9  12    0.21    0.52
  -5   9  13   -0.03    0.53
   5   9  13    0.39    0.49
  -5   9  13   -0.06    0.30
  -5  -9  13    0.11    0.30
  -5   9  14   -0.16    0.33
   5   9  14    0.05    0.50
  -5   9  14    0.58    0.60
  -5  -9  14    0.14    0.32
  -5   9  15    1.22    0.67
   5   9  15    0.63    0.54
  -5   9  15    0.04    0.34
  -5  -9  15   -0.16    0.33
  -5   9  16   -0.64    0.72
   5   9  16    0.60    0.60
  -5   9  16    0.20    0.38
  -5  -9  16   -0.02    0.35
  -5   9  17    0.48    0.39
  -5  -9  17   -0.09    0.37
  -5 -11 -16    0.34    0.46
  -5 -11 -15   -0.02    0.44
  -5 -11 -14    0.47    0.42
  -5 -11 -13    0.13    0.38
   5  11 -12   -0.35    0.35
  -5 -11 -12    0.33    0.35
  -5  11 -12    0.03    0.28
   5  11 -11    0.64    0.35
  -5 -11 -11   -0.19    0.31
  -5 -11 -11    0.31    0.34
  -5  11 -11    0.14    0.27
   5  11 -10    0.34    0.33
  -5 -11 -10   -0.10    0.27
  -5  11 -10    0.01    0.25
  -5 -11 -10    0.17    0.31
  -5 -11  -9    0.25    0.28
  -5  11  -9   -0.06    0.23
  -5 -11  -9    0.21    0.31
  -5 -11  -8    0.21    0.26
  -5  11  -8    0.08    0.22
   5 -11  -8    0.40    0.36
  -5 -11  -8    0.36    0.31
   5 -11  -7    0.83    0.41
  -5 -11  -7    0.13    0.31
   5 -11  -7    0.34    0.11
  -5 -11  -7    0.63    0.27
  -5  11  -7    0.32    0.23
   5 -11  -6    1.22    0.44
  -5 -11  -6    0.61    0.32
   5 -11  -6    0.85    0.16
  -5 -11  -6    0.51    0.24
  -5  11  -6    0.73    0.22
   5 -11  -5    0.94    0.45
   5 -11  -5    0.90    0.16
  -5 -11  -5    0.89    0.32
  -5 -11  -5    0.76    0.24
  -5  11  -5    0.45    0.20
   5 -11  -4    0.19    0.14
   5 -11  -4    0.72    0.49
  -5 -11  -4    0.42    0.31
  -5 -11  -4   -0.06    0.21
  -5  11  -4    0.24    0.18
   5 -11  -3    1.12    0.45
  -5 -11  -3    0.59    0.43
  -5 -11  -3    0.37    0.21
  -5  11  -3    0.18    0.17
  -5 -11  -3   -0.13    0.31
   5 -11  -3    0.80    0.49
   5 -11  -2    0.64    0.43
  -5 -11  -2    0.68    0.45
  -5 -11  -2    0.55    0.39
  -5 -11  -2    0.16    0.31
  -5 -11  -1    0.25    0.41
   5 -11  -1    0.63    0.42
  -5 -11  -1   -0.03    0.37
   5 -11   0    0.12    0.44
  -5 -11   0    0.44    0.35
  -5 -11   0   -0.18    0.42
   5 -11   1    0.10    0.50
  -5 -11   1    0.50    0.42
  -5 -11   1    0.45    0.36
   5 -11   2    0.09    0.51
  -5 -11   2    0.67    0.42
  -5 -11   2    0.38    0.37
  -5  11   3    0.16    0.18
  -5 -11   3    0.31    0.38
  -5 -11   4   -0.10    0.14
  -5  11   4    0.28    0.19
   5 -11   5    0.81    0.32
  -5 -11   5    0.35    0.17
  -5  11   5    0.68    0.21
  -5 -11   6    0.28    0.18
   5 -11   6    0.64    0.33
  -5  11   6    0.22    0.22
  -5  11   7    0.62    0.23
  -5 -11   7    0.69    0.20
   5 -11   7    0.71    0.34
  -5  11   8    0.29    0.45
  -5  11   8    0.08    0.23
  -5 -11   8    0.14    0.20
   5  11   9    0.50    0.44
  -5  11   9    0.35    0.24
  -5 -11   9    0.15    0.20
  -5  11  10   -0.31    0.46
   5  11  10    0.40    0.44
  -5  11  10   -0.15    0.25
  -5 -11  10    0.09    0.21
  -5 -11  11   -0.01    0.23
   5  11  11    0.28    0.46
  -5  11  11    0.18    0.27
  -5  11  11    0.25    0.49
  -5  11  12    0.81    0.53
   5  11  12    0.32    0.48
  -5  11  12    0.10    0.28
  -5 -11  12   -0.04    0.24
  -5  11  13    0.14    0.56
   5  11  13    0.78    0.54
  -5  11  13    0.03    0.30
  -5 -11  13    0.11    0.25
  -5  11  14    0.80    0.62
  -5  11  14    0.44    0.34
  -5 -11  14    0.15    0.27
   5  11  14    0.38    0.54
  -5  11  15    0.44    0.69
  -5  11  15   -0.13    0.34
  -5 -11  15    0.03    0.28
   5  11  15    1.04    0.62
  -5  11  16   -0.12    0.36
  -5 -11  16    0.24    0.29
  -5  11  17    0.41    0.39
  -5 -11  17   -0.05    0.29
  -5 -13 -14   -0.05    0.43
  -5 -13 -13   -0.29    0.40
  -5 -13 -12    0.40    0.39
  -5 -13 -11   -0.14    0.35
   5 -13 -10    0.44    0.33
  -5 -13 -10    0.20    0.35
  -5  13  -9    0.06    0.22
   5 -13  -9    0.21    0.34
  -5 -13  -9    0.23    0.32
   5 -13  -8    0.36    0.37
  -5 -13  -8    0.24    0.32
  -5  13  -8   -0.14    0.20
   5 -13  -7    0.19    0.38
  -5 -13  -7   -0.42    0.33
  -5  13  -7    0.08    0.20
   5 -13  -6    0.67    0.44
  -5 -13  -6    0.43    0.33
  -5  13  -6   -0.01    0.18
   5 -13  -6    0.34    0.17
  -5  13  -5    0.09    0.16
   5 -13  -5    0.21    0.17
  -5 -13  -5    0.48    0.34
  -5  13  -4    0.31    0.15
   5 -13  -4    0.27    0.17
  -5 -13  -4    0.17    0.21
  -5 -13  -4    0.82    0.45
   5 -13  -4    1.15    0.52
  -5 -13  -4    0.29    0.33
  -5 -13  -3    0.26    0.43
  -5 -13  -3    0.02    0.33
  -5 -13  -3    0.03    0.19
  -5  13  -3    0.02    0.13
  -5 -13  -2   -0.31    0.33
  -5 -13  -2    0.12    0.40
  -5 -13  -2    0.12    0.17
  -5  13  -2    0.22    0.12
  -5 -13  -1    0.24    0.38
  -5 -13  -1    0.18    0.18
  -5  13  -1    0.13    0.11
  -5  13   0    0.21    0.11
  -5 -13   0    0.06    0.38
  -5  13   0    0.00    0.11
  -5 -13   0    0.37    0.19
  -5 -13   1    0.13    0.08
  -5 -13   1    0.35    0.37
  -5  13   1    0.19    0.12
  -5  13   2    0.16    0.13
  -5 -13   2    0.11    0.38
  -5 -13   2    0.16    0.10
  -5  13   3    0.25    0.14
  -5 -13   3    0.17    0.11
  -5  13   4    0.25    0.15
  -5 -13   4    0.27    0.12
  -5  13   5    0.12    0.17
  -5 -13   5   -0.02    0.12
  -5  13   6    0.13    0.18
  -5 -13   6    0.17    0.14
  -5 -13   7    0.05    0.16
  -5  13   7    0.04    0.20
  -5  13   8    0.07    0.21
  -5 -13   8   -0.03    0.16
  -5  13   9   -0.17    0.22
  -5 -13   9    0.25    0.17
  -5  13  10    0.20    0.24
  -5  13  11   -0.10    0.25
  -5  13  12   -0.76    0.57
   5  13  12   -0.36    0.54
  -5  13  12   -0.14    0.27
  -5  13  13    0.23    0.30
   5  13  13   -0.25    0.55
  -5  13  14    0.02    0.31
  -5 -15 -11   -0.04    0.39
  -5 -15 -10    0.15    0.38
  -5 -15  -9    0.22    0.36
   5 -15  -9    0.20    0.34
   5 -15  -8   -0.18    0.38
  -5 -15  -8    0.40    0.38
   5 -15  -7    0.59    0.42
  -5 -15  -7   -0.06    0.35
  -5 -15  -6   -0.05    0.54
   5 -15  -6    0.45    0.44
  -5 -15  -6    0.12    0.36
  -5 -15  -5    0.14    0.37
  -5 -15  -5    0.57    0.50
  -5 -15  -4    0.19    0.48
  -5 -15  -4   -0.04    0.36
  -5 -15  -3    0.28    0.43
  -5 -15  -3   -0.08    0.36
  -5 -15  -2    0.26    0.34
  -5 -15  -2    0.42    0.42
  -5 -15  -1    0.65    0.41
  -5 -15   0   -0.16    0.35
  -5 -15   1   -0.08    0.38
  -5 -15   2   -0.10    0.37
  -5 -17  -6    0.11    0.63
  -5 -17  -5   -0.40    0.55
  -5 -17  -5   -0.21    0.42
  -5 -17  -4    0.47    0.50
  -5 -17  -4    0.53    0.43
  -5 -17  -3    0.41    0.42
  -5 -17  -3    0.75    0.46
  -5 -17  -2    0.25    0.41
  -5 -17  -2   -0.04    0.42
  -5 -17  -1    0.69    0.40
  -5 -17  -1    0.02    0.39
  -5 -17   0    0.13    0.38
  -5 -17   1   -0.08    0.37
  -6   0 -14    0.04    0.36
  -6   0 -13    0.35    0.34
  -6   0 -12    5.92    0.48
  -6   0 -12    5.17    0.45
  -6   0 -11   -0.07    0.29
  -6   0 -11   -0.14    0.32
  -6   0 -10    8.30    0.49
  -6   0 -10    6.45    0.44
  -6   0  -9   -0.06    0.24
  -6   0  -8    0.50    0.24
  -6   0  -4   43.05    1.20
   6   0  -4   46.28    1.08
   6   0  -3    0.04    0.14
  -6   0  -3   -0.09    0.18
  -6   0  -2    0.93    0.19
  -6   0  -1    0.19    0.18
  -6   0   0  127.73    2.90
  -6   0   0  126.78    2.95
   6   0   1    0.09    0.15
  -6   0   1    0.12    0.14
  -6   0   2    0.99    0.15
   6   0   2    0.65    0.17
  -6   0   3    0.08    0.12
   6   0   3    0.18    0.17
   6   0   4   47.58    1.22
   6   0   5   -0.07    0.19
   6   0   6    2.56    0.24
   6   0   7   -0.01    0.20
   6   0   8    0.69    0.22
   6   0   9    0.05    0.24
  -6   0  10    6.93    0.48
   6   0  10    7.82    0.44
  -6   0  11    0.06    0.32
   6   0  11    0.06    0.29
  -6   0  12    5.27    0.48
  -6   0  12    5.04    0.33
  -6   0  13    0.04    0.34
  -6   0  13    0.07    0.23
  -6   0  14    0.01    0.22
  -6   0  14    0.02    0.34
  -6   0  15   -0.22    0.35
  -6   0  15    0.30    0.24
  -6   0  16    0.05    0.35
  -6   0  16    0.15    0.24
  -6   0  17   -0.28    0.36
  -6   0  17    0.27    0.26
  -6   0  18   -0.52    0.40
  -6  -2 -16    0.62    0.39
  -6  -2 -15   -0.21    0.36
  -6  -2 -14    0.27    0.36
  -6  -2 -13    0.71    0.36
  -6  -2 -12    2.08    0.38
  -6   2 -12    1.72    0.37
  -6  -2 -12    2.00    0.39
  -6  -2 -11    1.26    0.34
  -6   2 -11    1.84    0.34
  -6  -2 -11    1.82    0.35
  -6  -2 -10   12.54    0.60
  -6   2 -10   13.50    0.62
  -6  -2  -9    0.54    0.27
  -6   2  -9    0.75    0.29
  -6  -2  -9    0.94    0.28
  -6  -2  -8    3.98    0.35
  -6   2  -8    3.85    0.34
  -6  -2  -8    3.41    0.33
  -6  -2  -7    1.30    0.27
  -6   2  -7    1.85    0.27
  -6   2  -6    2.35    0.27
  -6   2  -5    7.43    0.38
   6  -2  -4    1.08    0.22
  -6   2  -4    0.80    0.21
  -6   2  -3   12.47    0.46
   6  -2  -3   12.10    0.43
  -6  -2  -2   11.85    0.45
   6  -2  -2   11.03    0.44
  -6   2  -2   10.96    0.48
  -6   2  -2   12.51    0.43
  -6   2  -1   12.70    0.46
   6  -2  -1   11.73    0.36
  -6  -2  -1   12.20    0.44
  -6   2  -1   12.12    0.42
   6  -2   0   29.20    0.75
  -6   2   0   29.05    0.76
  -6  -2   0   27.92    0.79
  -6   2   0   28.62    0.79
  -6  -2   1   12.71    0.43
   6  -2   1   11.85    0.40
  -6   2   1   12.99    0.39
   6  -2   1   11.99    0.35
  -6  -2   1   12.13    0.35
   6  -2   2   11.96    0.42
  -6   2   2   12.25    0.37
  -6   2   2   13.06    0.38
   6  -2   3   12.40    0.42
   6   2   3   11.11    0.42
  -6   2   3   11.35    0.33
  -6   2   3   11.79    0.39
   6   2   3   11.08    0.38
   6   2   4    0.92    0.20
  -6   2   4    0.93    0.11
   6  -2   4    1.35    0.20
  -6   2   4    0.78    0.22
   6   2   4    0.54    0.21
  -6   2   5    6.64    0.21
   6   2   5    6.95    0.34
   6  -2   5    7.33    0.35
   6   2   6    1.73    0.23
   6  -2   6    2.07    0.24
   6   2   7    1.73    0.26
   6  -2   7    2.55    0.27
   6   2   8    4.07    0.31
   6  -2   8    4.86    0.34
  -6  -2   9    0.54    0.29
   6  -2   9    0.81    0.28
  -6   2   9    0.64    0.14
   6  -2  10   14.69    0.60
  -6  -2  10   14.14    0.65
  -6   2  10   13.39    0.43
  -6  -2  11    1.93    0.38
   6  -2  11    1.80    0.34
  -6   2  11    1.86    0.20
  -6  -2  12    2.05    0.41
  -6   2  12    2.02    0.23
  -6  -2  13    0.61    0.36
  -6   2  13    0.60    0.22
  -6  -2  14    0.23    0.28
  -6   2  14    0.05    0.21
  -6  -2  14   -0.37    0.36
  -6  -2  15    0.01    0.28
  -6  -2  15    0.12    0.35
  -6   2  15    0.37    0.22
  -6   2  16   -0.35    0.38
  -6  -2  16   -0.07    0.36
  -6   2  16    0.11    0.22
  -6  -2  16    0.01    0.28
  -6   2  17    0.08    0.36
  -6  -2  17    0.62    0.40
  -6   2  18    0.25    0.41
  -6  -2  18    0.97    0.42
  -6  -4 -18    0.56    0.46
  -6  -4 -17    0.03    0.42
  -6  -4 -16   -0.23    0.39
  -6  -4 -15    0.07    0.36
  -6  -4 -14    0.29    0.36
  -6  -4 -13    0.17    0.34
  -6  -4 -12    2.64    0.40
  -6  -4 -11    1.66    0.38
  -6   4 -11    2.01    0.38
  -6  -4 -11    1.62    0.36
  -6  -4 -10    5.48    0.46
  -6  -4 -10    6.01    0.46
  -6   4 -10    6.37    0.46
  -6  -4  -9    0.66    0.32
  -6   4  -9    0.93    0.32
  -6  -4  -9    0.19    0.31
  -6  -4  -8    4.53    0.37
  -6  -4  -8    3.87    0.37
  -6   4  -8    4.85    0.38
   6   4  -7    0.55    0.19
  -6  -4  -7    0.58    0.25
   6   4  -6   14.59    0.42
  -6  -4  -6   14.58    0.58
  -6  -4  -5    0.92    0.24
  -6   4  -4   16.89    0.66
   6  -4  -4   15.73    0.58
   6  -4  -3   22.44    0.72
  -6   4  -3   22.18    0.76
  -6   4  -2   45.71    1.24
   6  -4  -2   45.74    1.22
   6  -4  -2   44.67    1.05
  -6   4  -1   16.75    0.58
   6  -4  -1   14.93    0.60
   6  -4  -1   16.29    0.43
   6  -4  -1   13.11    0.51
  -6  -4  -1   12.86    0.50
  -6   4   0   51.48    1.35
  -6  -4   0   50.31    1.34
   6  -4   0   52.95    1.26
   6  -4   0   52.70    1.31
  -6  -4   0   52.44    1.30
  -6  -4   1   14.86    0.40
   6  -4   1   15.18    0.47
   6  -4   1   13.75    0.48
  -6  -4   1   13.82    0.48
   6  -4   2   43.29    1.11
   6  -4   3   22.17    0.66
  -6   4   3   21.02    0.67
   6   4   3   22.84    0.68
   6  -4   4   17.89    0.58
   6   4   4   16.93    0.58
  -6   4   4   16.58    0.59
   6   4   5    0.77    0.26
   6   4   5    1.02    0.21
  -6   4   5    0.46    0.27
   6  -4   5    0.82    0.23
   6  -4   6   15.70    0.56
   6   4   6   13.97    0.52
  -6   4   6   15.27    0.60
   6   4   6   13.56    0.55
   6  -4   7    0.93    0.26
  -6   4   7    1.45    0.36
   6   4   7    0.84    0.32
   6  -4   8    5.05    0.38
  -6   4   9    0.59    0.31
  -6  -4   9    0.58    0.33
   6  -4   9    1.18    0.31
  -6   4  10    5.20    0.18
   6   4  10    6.31    0.42
  -6   4  10    6.16    0.46
  -6  -4  10    5.74    0.47
   6  -4  10    6.36    0.45
   6   4  11    0.97    0.32
  -6   4  11    1.24    0.16
   6  -4  11    1.75    0.37
  -6   4  11    1.78    0.39
  -6  -4  11    1.47    0.37
  -6   4  12    1.73    0.38
  -6  -4  12    2.09    0.42
  -6   4  12    2.67    0.20
  -6   4  13    0.35    0.34
  -6   4  13    0.16    0.18
  -6  -4  13    0.04    0.33
  -6   4  14   -0.10    0.19
  -6   4  14    0.26    0.35
  -6  -4  14    0.07    0.35
  -6   4  15    0.21    0.22
  -6   4  15    0.36    0.35
  -6  -4  15    0.34    0.35
  -6  -4  16    0.20    0.37
  -6   4  16    0.05    0.36
  -6   4  17   -0.03    0.39
  -6  -4  17   -0.21    0.39
  -6   4  18    0.08    0.42
  -6  -4  18   -0.23    0.43
  -6  -6 -18    0.26    0.49
  -6  -6 -17   -0.08    0.45
  -6  -6 -16    0.43    0.43
  -6  -6 -15    0.29    0.40
  -6  -6 -14    0.16    0.36
  -6  -6 -13    0.41    0.36
   6   6 -12    0.05    0.31
  -6  -6 -12    0.08    0.33
   6   6 -11    0.50    0.30
  -6  -6 -11    0.40    0.33
  -6   6 -11    0.73    0.34
  -6  -6 -11    0.34    0.34
   6   6 -10    0.29    0.31
  -6  -6 -10   -0.05    0.33
  -6   6 -10    0.10    0.32
  -6  -6 -10   -0.25    0.34
   6   6  -9    4.57    0.36
  -6  -6  -9    4.82    0.44
  -6  -6  -9    4.33    0.43
  -6   6  -9    4.32    0.41
  -6  -6  -8    1.01    0.34
  -6   6  -8    0.50    0.31
   6   6  -8    0.50    0.27
  -6  -6  -8    0.11    0.31
  -6   6  -8    0.07    0.48
  -6   6  -7    1.17    0.31
  -6  -6  -7    0.82    0.34
   6   6  -7    1.64    0.25
  -6  -6  -7    1.78    0.33
  -6   6  -7    1.51    0.45
  -6   6  -6    5.98    0.51
  -6  -6  -6    5.69    0.41
   6  -6  -5    0.39    0.35
  -6  -6  -5    0.65    0.27
  -6   6  -5    0.34    0.38
   6  -6  -4    5.49    0.44
  -6   6  -4    5.76    0.47
  -6  -6  -4    5.20    0.39
  -6   6  -3    4.67    0.44
  -6  -6  -3    4.26    0.36
   6  -6  -3    3.62    0.43
   6  -6  -2   12.37    0.60
  -6  -6  -2   11.87    0.52
   6  -6  -2   11.47    0.34
   6  -6  -2   12.74    0.56
  -6  -6  -2   10.16    0.52
  -6   6  -2   13.86    0.57
   6  -6  -1    1.24    0.33
  -6  -6  -1    0.74    0.32
  -6   6  -1    1.61    0.36
   6  -6  -1    0.10    0.41
   6  -6  -1    0.67    0.16
   6  -6   0   33.76    1.08
   6  -6   0   33.14    0.90
   6  -6   0   36.32    1.00
  -6  -6   0   36.56    1.00
  -6  -6   1    1.09    0.32
  -6  -6   1    1.00    0.24
   6  -6   1    0.55    0.30
   6  -6   1    1.55    0.22
  -6  -6   2   10.99    0.42
   6  -6   2   12.22    0.46
   6  -6   3    4.12    0.31
   6  -6   4    5.07    0.34
  -6   6   4    4.77    0.37
   6   6   4    4.79    0.39
  -6   6   5    0.19    0.31
   6   6   5    0.32    0.31
   6  -6   5   -0.04    0.25
   6  -6   6    5.08    0.38
  -6   6   6    5.03    0.44
   6   6   6    5.60    0.44
  -6   6   7    2.24    0.41
   6   6   7    1.75    0.40
   6  -6   7    1.05    0.32
  -6   6   8    0.54    0.43
   6   6   8    0.79    0.41
  -6   6   8    0.53    0.32
   6   6   8    0.24    0.28
  -6  -6   8    0.81    0.32
   6  -6   8    0.07    0.32
   6   6   9    3.92    0.37
  -6   6   9    4.05    0.42
  -6  -6   9    4.61    0.44
   6  -6   9    4.90    0.44
  -6   6   9    4.74    0.55
   6   6   9    4.66    0.50
  -6   6  10    0.32    0.52
   6   6  10    0.09    0.43
   6   6  10    0.33    0.28
  -6  -6  10    0.48    0.33
   6  -6  10    0.23    0.32
  -6   6  10    0.30    0.32
  -6   6  11   -0.19    0.31
   6   6  11    1.42    0.49
  -6  -6  11    0.21    0.33
  -6   6  11    0.92    0.55
   6   6  12    1.27    0.47
  -6   6  12    0.44    0.34
  -6  -6  12    0.31    0.33
  -6   6  12    0.83    0.56
  -6   6  13    0.02    0.34
  -6  -6  13    0.25    0.35
  -6   6  13    1.25    0.64
   6   6  13    1.49    0.48
   6   6  14    1.40    0.50
  -6   6  14    0.31    0.34
  -6  -6  14    0.69    0.37
  -6   6  14    1.55    0.67
  -6   6  15    0.44    0.36
  -6  -6  15    0.14    0.35
  -6   6  15    0.04    0.70
   6   6  15    0.87    0.53
  -6  -6  16   -0.03    0.38
  -6   6  16   -0.24    0.38
  -6   6  17    0.13    0.42
  -6  -6  17    0.03    0.42
   6   6  18    0.67    0.62
  -6  -8 -17    0.03    0.48
  -6  -8 -16    0.29    0.46
  -6  -8 -15   -0.02    0.41
   6   8 -14   -0.17    0.34
  -6  -8 -14    0.40    0.38
   6   8 -13   -0.25    0.33
  -6  -8 -13    0.67    0.38
   6   8 -12    0.30    0.31
  -6  -8 -12    0.09    0.35
   6   8 -11   -0.03    0.30
  -6  -8 -11    0.61    0.34
  -6  -8 -11   -0.02    0.33
  -6   8 -11    0.03    0.30
   6   8 -10    1.37    0.31
  -6  -8 -10    0.82    0.35
  -6  -8 -10    0.66    0.34
  -6   8 -10    0.73    0.32
   6   8  -9    1.46    0.31
  -6   8  -9    1.02    0.33
  -6  -8  -9    0.78    0.34
   6   8  -8    0.97    0.29
  -6  -8  -8    1.12    0.35
  -6   8  -8    1.31    0.32
  -6   8  -8    1.51    0.50
  -6  -8  -8    1.16    0.35
  -6  -8  -7    3.46    0.40
  -6  -8  -7    3.28    0.40
  -6   8  -7    2.86    0.36
  -6   8  -7    3.97    0.52
  -6   8  -6    1.55    0.31
  -6  -8  -6    1.78    0.34
  -6   8  -6    1.74    0.49
  -6  -8  -6    2.12    0.35
   6  -8  -5    1.24    0.44
  -6   8  -5    0.43    0.42
  -6  -8  -5    0.60    0.30
   6  -8  -4    4.46    0.49
  -6  -8  -4    3.85    0.39
  -6   8  -4    3.26    0.45
  -6   8  -3    1.50    0.39
  -6  -8  -3    1.04    0.31
   6  -8  -3    1.35    0.44
   6  -8  -3    0.58    0.13
  -6  -8  -2    1.00    0.39
  -6   8  -2    1.02    0.39
  -6  -8  -2    0.70    0.29
   6  -8  -2    1.55    0.44
   6  -8  -2    1.01    0.16
   6  -8  -2    1.61    0.40
   6  -8  -1    1.59    0.36
  -6  -8  -1    0.70    0.34
  -6  -8  -1    1.02    0.31
   6  -8  -1    0.82    0.43
   6  -8  -1    0.97    0.20
   6  -8   0   -0.28    0.33
  -6  -8   0    0.15    0.33
  -6  -8   0    0.33    0.26
   6  -8   0    0.27    0.42
   6  -8   0    0.22    0.20
   6  -8   1    1.01    0.36
  -6  -8   1    1.26    0.29
   6  -8   1    0.73    0.44
  -6  -8   1    1.44    0.36
   6  -8   1    0.69    0.23
   6  -8   2    0.82    0.37
  -6  -8   2    0.69    0.28
   6  -8   2    0.98    0.24
   6  -8   3    0.90    0.26
   6  -8   4    3.38    0.34
   6  -8   5    0.08    0.29
  -6   8   6    1.71    0.42
   6   8   6    1.96    0.43
   6  -8   6    2.35    0.36
  -6   8   7    2.54    0.36
  -6   8   7    4.13    0.51
   6   8   7    3.16    0.47
  -6  -8   7    3.36    0.37
   6  -8   7    4.01    0.41
  -6   8   8    1.41    0.46
   6   8   8    0.77    0.42
  -6   8   8    0.86    0.32
  -6  -8   8    1.09    0.31
   6  -8   8    1.08    0.35
  -6   8   9    1.50    0.49
   6   8   9    1.43    0.45
  -6   8   9    1.22    0.32
  -6  -8   9    0.87    0.31
   6  -8   9    1.48    0.36
   6   8  10    0.65    0.42
  -6   8  10    1.20    0.32
  -6  -8  10    0.69    0.30
  -6   8  10    0.30    0.47
  -6  -8  11    0.33    0.31
  -6   8  11    0.23    0.48
  -6   8  11    0.18    0.30
   6   8  11    0.20    0.44
  -6   8  12    0.62    0.52
   6   8  12    0.54    0.46
  -6   8  12    0.02    0.30
  -6  -8  12    0.29    0.30
  -6   8  13    0.82    0.59
   6   8  13    0.67    0.48
  -6   8  13    0.32    0.32
  -6  -8  13    0.34    0.31
   6   8  14    0.52    0.48
  -6   8  14   -0.34    0.35
  -6  -8  14   -0.13    0.32
  -6   8  15    0.21    0.67
  -6   8  15   -0.50    0.37
  -6  -8  15   -0.20    0.35
   6   8  16    0.08    0.55
  -6  -8  16    0.17    0.39
  -6   8  16   -0.34    0.41
   6   8  17   -0.17    0.58
  -6   8  17   -0.08    0.87
  -6   8  17   -0.29    0.41
  -6  -8  17   -0.78    0.44
  -6 -10 -16   -0.32    0.46
  -6 -10 -15    0.28    0.44
  -6 -10 -14   -0.56    0.44
   6  10 -13    0.36    0.35
  -6 -10 -13    0.02    0.38
   6  10 -12   -0.32    0.32
  -6 -10 -12    0.24    0.37
  -6  10 -11   -0.39    0.28
   6  10 -11    0.08    0.30
  -6 -10 -11   -0.02    0.33
  -6 -10 -11   -0.21    0.34
  -6  10 -10    0.43    0.28
   6  10 -10   -0.02    0.29
  -6 -10 -10    0.30    0.33
  -6 -10 -10   -0.22    0.31
  -6 -10  -9    0.55    0.34
  -6 -10  -9   -0.26    0.30
  -6  10  -9   -0.03    0.25
   6 -10  -8    0.51    0.43
  -6 -10  -8    0.43    0.32
  -6 -10  -8    0.15    0.29
  -6  10  -8    0.34    0.26
   6 -10  -7    0.70    0.43
  -6 -10  -7    0.69    0.32
  -6 -10  -7    0.40    0.29
  -6  10  -7    0.09    0.24
   6 -10  -6    0.72    0.47
  -6 -10  -6    0.65    0.29
  -6  10  -6    0.67    0.25
  -6 -10  -6    0.77    0.33
  -6 -10  -5    0.30    0.28
  -6  10  -5    0.24    0.23
   6 -10  -5    0.53    0.45
  -6 -10  -5    0.44    0.31
  -6  10  -4    0.64    0.44
   6 -10  -4    0.26    0.11
   6 -10  -4    0.59    0.48
  -6 -10  -4    0.92    0.33
   6 -10  -4    0.35    0.13
  -6 -10  -3    0.02    0.30
  -6 -10  -3    1.07    0.43
   6 -10  -3    0.93    0.49
  -6  10  -3   -0.02    0.40
   6 -10  -3    0.58    0.17
   6 -10  -3    1.15    0.42
   6 -10  -2    0.77    0.42
  -6 -10  -2    0.37    0.42
  -6 -10  -2    0.07    0.30
   6 -10  -2    0.46    0.47
   6 -10  -2    0.33    0.18
   6 -10  -1    0.64    0.41
  -6 -10  -1    0.16    0.40
  -6 -10  -1    0.02    0.30
  -6 -10  -1    0.37    0.29
   6 -10  -1    0.22    0.47
   6 -10  -1    0.43    0.20
   6 -10   0    0.19    0.22
   6 -10   0    0.60    0.42
  -6 -10   0    0.54    0.40
  -6 -10   0    0.32    0.29
   6 -10   0    0.18    0.47
   6 -10   1    0.75    0.24
   6 -10   1   -0.17    0.42
  -6 -10   1    0.03    0.37
  -6 -10   1    0.64    0.32
   6 -10   1    0.16    0.47
  -6 -10   2    0.30    0.39
   6 -10   2    0.15    0.45
  -6 -10   2    0.02    0.34
   6 -10   2    0.35    0.25
   6 -10   3    0.56    0.28
   6 -10   4    0.15    0.27
   6 -10   5    0.49    0.30
  -6 -10   6    0.45    0.21
  -6  10   6    0.42    0.25
   6 -10   6    0.61    0.32
  -6 -10   7   -0.08    0.21
  -6  10   7    0.57    0.27
   6 -10   7    0.39    0.32
  -6  10   8    0.08    0.41
   6  10   8    0.70    0.41
  -6  10   8    0.30    0.26
  -6 -10   8    0.40    0.22
  -6 -10   9    0.28    0.23
  -6  10   9    0.21    0.45
   6  10   9    0.04    0.40
  -6  10   9    0.14    0.27
  -6  10  10    0.27    0.44
   6  10  10    0.56    0.43
  -6  10  10   -0.15    0.28
  -6 -10  10    0.01    0.23
  -6  10  11   -0.15    0.49
   6  10  11   -0.33    0.43
  -6  10  11    0.20    0.28
  -6 -10  11    0.09    0.24
  -6  10  12    0.05    0.52
   6  10  12    0.07    0.45
  -6  10  12    0.37    0.30
  -6 -10  12    0.06    0.25
  -6  10  13    0.23    0.57
   6  10  13   -0.12    0.50
  -6  10  13   -0.13    0.32
  -6 -10  13   -0.21    0.28
  -6  10  14    0.06    0.35
  -6  10  14   -0.25    0.64
   6  10  14    0.13    0.51
  -6 -10  14    0.30    0.31
   6  10  15    0.27    0.55
  -6  10  15    0.10    0.70
  -6  10  15   -0.13    0.37
  -6 -10  15   -0.04    0.32
  -6  10  16    0.11    0.38
  -6 -10  16   -0.45    0.33
  -6  10  17   -0.14    0.40
  -6 -10  17    0.18    0.35
  -6 -12 -14   -0.41    0.44
  -6 -12 -13    0.12    0.41
  -6 -12 -12    0.09    0.36
   6 -12 -11   -0.03    0.35
  -6 -12 -11    0.49    0.37
   6 -12 -10   -0.14    0.38
  -6  12 -10    0.09    0.25
  -6 -12 -10    0.08    0.35
   6 -12  -9    0.73    0.40
  -6  12  -9   -0.12    0.24
  -6 -12  -9    0.20    0.33
  -6  12  -8    0.18    0.23
   6 -12  -8    0.08    0.41
  -6 -12  -8    0.81    0.34
   6 -12  -7    0.33    0.45
  -6 -12  -7    0.19    0.33
  -6 -12  -7    0.17    0.29
  -6  12  -7    0.05    0.21
   6 -12  -6    1.00    0.48
  -6 -12  -6    0.63    0.34
  -6 -12  -6    0.26    0.29
  -6  12  -6   -0.21    0.20
   6 -12  -5    0.64    0.49
  -6 -12  -5    0.11    0.32
   6 -12  -5    0.17    0.13
  -6 -12  -5    0.33    0.27
  -6  12  -5    0.20    0.19
   6 -12  -5    0.23    0.14
   6 -12  -4    0.14    0.13
  -6 -12  -4    0.27    0.33
   6 -12  -4   -0.02    0.16
   6 -12  -4    0.82    0.53
  -6 -12  -4   -0.01    0.26
  -6  12  -4    0.23    0.18
   6 -12  -3    0.16    0.18
  -6 -12  -3    0.54    0.35
  -6 -12  -3    0.22    0.27
  -6  12  -3    0.13    0.18
  -6 -12  -3    0.19    0.33
   6 -12  -3    0.53    0.52
   6 -12  -3    0.87    0.45
  -6 -12  -3    0.78    0.45
   6 -12  -2    0.10    0.44
   6 -12  -2    0.19    0.20
  -6 -12  -2    0.36    0.33
  -6 -12  -2    0.62    0.33
   6 -12  -2    0.10    0.51
  -6 -12  -2    0.46    0.45
   6 -12  -1    0.50    0.46
  -6 -12  -1    0.04    0.32
  -6 -12  -1    0.26    0.44
  -6 -12  -1    0.49    0.31
   6 -12  -1    0.22    0.51
   6 -12  -1    0.25    0.22
  -6 -12   0    0.45    0.43
   6 -12   0    0.49    0.24
   6 -12   0    0.13    0.46
  -6 -12   0   -0.21    0.29
   6 -12   0    0.12    0.54
   6 -12   1    0.01    0.25
   6 -12   1   -0.34    0.50
  -6 -12   1   -0.29    0.43
  -6 -12   1    0.35    0.32
   6 -12   1    0.41    0.52
   6 -12   2   -0.14    0.26
   6 -12   2    0.96    0.54
  -6 -12   2    0.17    0.42
  -6 -12   2    0.59    0.36
   6 -12   3   -0.07    0.28
   6 -12   3    0.46    0.56
  -6 -12   3    0.31    0.42
  -6  12   3    0.08    0.19
   6 -12   4    0.07    0.29
  -6  12   4    0.36    0.20
  -6 -12   4    0.06    0.13
   6 -12   5    0.24    0.31
  -6  12   5    0.15    0.20
  -6 -12   5    0.14    0.14
  -6 -12   6    0.25    0.15
  -6  12   6    0.35    0.22
  -6  12   7    0.35    0.24
  -6 -12   7    0.12    0.16
  -6  12   8    0.12    0.24
  -6 -12   8    0.30    0.17
  -6  12   9    0.01    0.24
  -6 -12   9    0.19    0.17
  -6  12  10    0.35    0.26
  -6 -12  10   -0.04    0.18
  -6 -12  11    0.17    0.20
  -6  12  11    0.49    0.53
   6  12  11   -0.31    0.48
  -6  12  11    0.33    0.30
  -6  12  12   -0.03    0.56
   6  12  12   -0.05    0.48
  -6 -12  12    0.11    0.21
  -6  12  12    0.03    0.30
  -6  12  13   -0.99    0.62
   6  12  13    0.21    0.52
  -6  12  13   -0.28    0.32
  -6 -12  13   -0.24    0.22
  -6  12  14   -0.07    0.34
  -6  12  15   -0.40    0.35
  -6  12  16    0.22    0.38
  -6 -14 -11    0.22    0.41
   6 -14 -10    0.09    0.39
  -6 -14 -10   -0.02    0.38
   6 -14  -9    0.02    0.41
  -6 -14  -9    0.17    0.37
   6 -14  -8   -0.31    0.43
  -6 -14  -8   -0.10    0.36
   6 -14  -7    0.15    0.47
  -6 -14  -7    0.02    0.36
   6 -14  -6    0.38    0.47
  -6 -14  -6   -0.04    0.35
  -6 -14  -5    0.52    0.43
  -6 -14  -5    0.51    0.36
   6 -14  -5    0.92    0.53
  -6 -14  -4   -0.19    0.38
  -6 -14  -4    0.40    0.37
   6 -14  -4    0.21    0.54
  -6 -14  -3    0.54    0.36
  -6 -14  -3   -0.25    0.36
   6 -14  -3    0.22    0.55
  -6  14  -3    0.23    0.15
  -6 -14  -2    0.29    0.35
  -6 -14  -2    0.33    0.32
   6 -14  -2    0.11    0.57
  -6  14  -2    0.01    0.13
  -6 -14  -1    0.27    0.36
  -6 -14  -1    0.08    0.30
  -6  14  -1    0.08    0.12
   6 -14  -1    0.29    0.59
  -6  14   0    0.14    0.12
  -6 -14   0   -0.06    0.30
  -6  14   0    0.19    0.13
   6 -14   1    0.01    0.27
  -6 -14   1    0.12    0.31
  -6  14   1    0.15    0.13
   6 -14   2    0.16    0.28
  -6  14   2    0.27    0.14
  -6 -14   2    0.03    0.33
   6 -14   3    0.05    0.30
  -6  14   3    0.18    0.15
  -6  14   4    0.21    0.16
  -6  14   5   -0.02    0.17
  -6  14   6    0.11    0.19
  -6  14   7    0.32    0.22
  -6  14   8   -0.10    0.22
  -6  14   9   -0.18    0.24
  -6 -16  -8    0.29    1.27
  -6 -16  -7    0.40    0.74
  -6 -16  -6    0.39    0.55
  -6 -16  -6   -0.12    0.41
  -6 -16  -5    0.43    0.45
  -6 -16  -5    0.09    0.41
  -6 -16  -4    0.34    0.38
  -6 -16  -4    0.16    0.41
   6 -16  -4    0.87    0.58
  -6 -16  -3    0.07    0.40
  -6 -16  -3   -0.07    0.35
   6 -16  -3    0.18    0.61
  -6 -16  -2   -0.34    0.40
  -6 -16  -2   -0.32    0.32
  -6 -16  -1    0.33    0.38
  -6 -16  -1    0.27    0.30
  -6 -16   0   -0.20    0.39
  -6 -16   0   -0.01    0.29
  -6 -16   1   -0.33    0.31
  -6 -18  -3    0.38    0.33
  -6 -18  -2    0.15    0.30
  -7  -1 -15    0.12    0.39
  -7  -1 -14    0.23    0.37
  -7   1 -13    0.53    0.39
  -7  -1 -13    0.29    0.35
  -7  -1 -12    1.48    0.38
  -7  -1 -11    0.90    0.35
  -7  -1 -11    0.65    0.35
  -7  -1 -10    1.21    0.33
  -7  -1 -10    1.47    0.35
  -7  -1  -9    0.22    0.27
  -7   1  -8    7.57    0.46
  -7   1  -7    0.29    0.24
  -7   1  -6    1.05    0.26
   7  -1  -5    0.39    0.18
   7   1  -5    0.34    0.09
  -7  -1  -5    0.27    0.22
  -7   1  -5    0.52    0.22
   7  -1  -4    6.91    0.30
  -7  -1  -4    6.63    0.37
  -7   1  -4    7.26    0.37
  -7  -1  -3    1.81    0.24
   7  -1  -3    1.31    0.19
  -7   1  -3    1.26    0.22
  -7   1  -2   25.21    0.75
  -7  -1  -2   26.99    0.77
  -7   1  -2   25.99    0.76
  -7   1  -1    3.63    0.27
  -7  -1  -1    3.63    0.26
  -7   1  -1    3.29    0.24
  -7   1   0   17.17    0.50
  -7  -1   0   15.21    0.44
   7  -1   0   15.55    0.48
  -7   1   0   15.96    0.50
  -7  -1   0   15.60    0.52
   7  -1   1    3.13    0.22
  -7  -1   1    3.27    0.23
  -7   1   1    3.21    0.21
   7   1   2   24.74    0.72
  -7  -1   2   26.11    0.72
   7  -1   2   26.32    0.72
  -7   1   2   24.96    0.68
  -7   1   3    1.45    0.17
   7   1   3    1.15    0.16
  -7  -1   3    1.37    0.18
   7   1   3    1.68    0.21
   7  -1   3    1.07    0.20
  -7   1   3    1.45    0.15
   7   1   4    6.60    0.34
  -7   1   4    6.38    0.25
   7  -1   4    6.67    0.33
  -7   1   5    0.33    0.12
   7   1   5    0.49    0.20
   7  -1   5    0.38    0.21
   7   1   6    0.61    0.21
   7  -1   6    0.82    0.22
   7   1   7    0.22    0.22
   7  -1   7    0.30    0.23
   7   1   8    7.48    0.40
   7  -1   8    6.81    0.40
   7   1   9    0.23    0.26
   7  -1   9    0.20    0.27
   7   1  10    0.78    0.30
  -7  -1  10    0.96    0.35
   7  -1  10    1.09    0.32
  -7  -1  11    0.69    0.36
   7   1  11    0.52    0.31
   7  -1  11    0.87    0.32
  -7   1  11    0.62    0.20
  -7  -1  12    2.33    0.41
  -7   1  12    1.42    0.22
  -7  -1  13   -0.23    0.35
  -7   1  13    0.10    0.20
  -7  -1  14    0.61    0.37
  -7  -1  14    0.39    0.25
  -7   1  14    0.66    0.21
  -7   1  15    0.04    0.21
  -7  -1  15    0.43    0.39
  -7  -1  15    0.07    0.24
  -7  -1  16    0.03    0.39
  -7   1  16   -0.33    0.24
  -7  -1  16    0.01    0.25
  -7  -1  17   -0.08    0.39
  -7  -3 -17    0.16    0.44
  -7  -3 -16    0.15    0.40
  -7  -3 -15   -0.34    0.38
  -7  -3 -14    0.18    0.34
  -7  -3 -13    0.84    0.35
  -7  -3 -12    0.74    0.35
  -7  -3 -11    1.18    0.37
  -7   3 -11    1.46    0.37
  -7  -3 -11    0.77    0.35
  -7  -3 -10    1.09    0.35
  -7   3 -10    1.44    0.36
  -7  -3 -10    1.74    0.36
  -7   3  -9    0.60    0.31
  -7  -3  -9    0.72    0.31
  -7  -3  -9    0.76    0.32
  -7   3  -8    8.46    0.49
  -7  -3  -8    6.69    0.45
   7   3  -7    0.12    0.14
  -7   3  -7    0.17    0.26
  -7   3  -6    1.96    0.28
  -7   3  -5    0.52    0.23
   7  -3  -5    0.47    0.24
   7  -3  -4    1.24    0.26
  -7   3  -4    1.39    0.24
  -7   3  -4    0.69    0.34
   7  -3  -3    0.55    0.27
  -7  -3  -3    1.30    0.24
  -7   3  -3    0.34    0.31
  -7   3  -3    0.83    0.22
   7  -3  -2   32.37    0.91
  -7  -3  -2   31.09    0.93
  -7   3  -2   31.49    0.90
  -7   3  -2   33.93    0.94
   7  -3  -1    8.25    0.29
  -7  -3  -1    7.79    0.39
  -7   3  -1    7.48    0.34
  -7   3   0   14.19    0.51
  -7  -3   0   13.46    0.50
   7  -3   0   13.54    0.43
  -7   3   0   13.26    0.45
  -7  -3   1    8.07    0.37
   7  -3   1    8.40    0.33
  -7   3   1    7.08    0.30
   7  -3   1    8.20    0.31
  -7  -3   1    8.02    0.30
  -7  -3   2   31.35    0.86
   7  -3   2   32.14    0.84
  -7   3   2   29.44    0.78
  -7   3   3    1.03    0.21
   7  -3   3    0.93    0.21
  -7   3   3    0.68    0.12
  -7   3   4    1.88    0.24
   7   3   4    1.53    0.24
   7   3   4    2.03    0.23
  -7   3   4    1.09    0.11
   7  -3   4    1.33    0.23
  -7   3   5    0.81    0.26
   7   3   5    0.77    0.22
   7  -3   5    0.66    0.22
   7   3   5    0.58    0.24
  -7   3   6    1.94    0.31
   7   3   6    1.54    0.29
   7   3   6    2.13    0.26
   7  -3   6    1.39    0.26
   7   3   7    0.01    0.23
   7  -3   7   -0.01    0.24
   7   3   8    6.33    0.40
   7  -3   8    6.81    0.42
   7   3   9    1.37    0.29
  -7   3   9    0.71    0.10
   7  -3   9    1.24    0.31
  -7  -3  10    1.71    0.38
  -7   3  10    1.08    0.14
   7  -3  10    1.84    0.34
  -7   3  10    1.94    0.38
  -7   3  11    1.34    0.17
  -7   3  11    1.28    0.38
  -7  -3  11    1.27    0.38
  -7   3  12    0.69    0.18
  -7   3  12    0.85    0.37
  -7  -3  12    0.86    0.37
  -7   3  13   -0.07    0.36
  -7  -3  13   -0.05    0.35
  -7   3  13    0.12    0.17
  -7   3  14    0.27    0.34
  -7  -3  14    0.51    0.37
  -7   3  14    0.56    0.20
  -7   3  15    0.14    0.20
  -7   3  15   -0.03    0.40
  -7  -3  15   -0.21    0.39
  -7   3  16    1.03    0.42
  -7  -3  16    0.08    0.39
  -7   3  17    0.03    0.38
  -7  -3  17   -0.25    0.40
  -7  -5 -17   -0.39    0.46
  -7  -5 -16    0.26    0.40
  -7  -5 -15    0.34    0.39
  -7  -5 -14    0.42    0.37
  -7  -5 -13    0.39    0.35
  -7  -5 -12    0.82    0.36
   7   5 -11    0.23    0.27
  -7  -5 -11    0.20    0.33
   7   5 -10    3.07    0.30
  -7  -5 -10    3.27    0.44
  -7   5 -10    3.67    0.42
  -7  -5 -10    2.24    0.39
  -7  -5  -9    1.58    0.37
  -7   5  -9    2.09    0.38
   7   5  -9    1.66    0.25
  -7  -5  -9    1.61    0.36
  -7  -5  -8    5.34    0.42
   7   5  -8    6.06    0.28
  -7   5  -8    4.35    0.41
  -7  -5  -8    5.01    0.45
  -7  -5  -7    0.45    0.30
  -7   5  -7    0.30    0.45
   7  -5  -6    3.59    0.39
  -7   5  -6    4.57    0.48
  -7  -5  -6    4.91    0.39
   7  -5  -5    0.85    0.32
  -7  -5  -5    1.21    0.29
  -7   5  -5    1.26    0.38
   7  -5  -4    4.92    0.40
  -7   5  -4    5.29    0.44
  -7   5  -3    1.08    0.37
   7  -5  -3    0.81    0.35
  -7   5  -2   20.64    0.73
   7  -5  -2   19.31    0.73
   7  -5  -2   20.69    0.52
  -7   5  -1    9.63    0.49
   7  -5  -1    9.18    0.53
   7  -5  -1    9.42    0.32
   7  -5  -1    9.07    0.45
  -7  -5  -1    8.02    0.41
   7  -5   0    1.91    0.30
   7  -5   0    2.35    0.21
  -7  -5   0    2.47    0.30
  -7  -5   0    2.37    0.29
  -7  -5   1    8.71    0.31
  -7  -5   1    9.23    0.44
   7  -5   1    9.56    0.37
   7  -5   1    8.99    0.42
  -7  -5   1    9.04    0.41
   7  -5   2   20.92    0.64
   7  -5   3    0.76    0.23
   7  -5   4    4.94    0.33
  -7   5   4    4.73    0.34
   7   5   4    5.56    0.37
  -7   5   5    1.17    0.30
   7   5   5    0.85    0.28
   7  -5   5    1.59    0.27
   7  -5   6    3.76    0.34
  -7   5   6    4.58    0.40
   7   5   6    3.48    0.37
  -7   5   7    0.33    0.34
   7   5   7    0.31    0.33
   7   5   7    0.35    0.25
   7  -5   7   -0.08    0.28
   7  -5   8    6.71    0.45
  -7   5   8    7.19    0.54
   7   5   8    6.29    0.47
  -7   5   9    1.88    0.48
   7   5   9    2.10    0.43
  -7   5   9    1.29    0.36
   7  -5   9    1.99    0.38
  -7   5  10    3.60    0.57
   7   5  10    3.37    0.49
  -7   5  10    2.84    0.41
  -7  -5  10    2.77    0.42
   7  -5  10    3.58    0.41
  -7   5  11    0.41    0.34
  -7  -5  11    0.32    0.34
  -7   5  11    0.60    0.56
   7   5  11    0.87    0.41
  -7   5  12    0.99    0.35
  -7  -5  12    0.62    0.36
   7   5  12    1.44    0.47
  -7   5  13    0.21    0.34
  -7  -5  13    0.16    0.35
  -7   5  14   -0.34    0.37
  -7  -5  14    0.22    0.37
  -7   5  15    0.41    0.39
  -7  -5  15   -0.18    0.38
  -7   5  16    0.67    0.40
  -7  -5  16   -0.08    0.39
  -7  -5  17   -0.03    0.43
  -7   5  17    0.08    0.41
  -7  -7 -16    0.38    0.44
  -7  -7 -15    0.18    0.40
   7   7 -14   -0.14    0.31
  -7  -7 -14    0.14    0.38
   7   7 -13    0.60    0.30
  -7  -7 -13    0.36    0.36
   7   7 -12    0.36    0.29
  -7  -7 -12    0.28    0.34
   7   7 -11    0.21    0.26
  -7  -7 -11    0.80    0.36
   7   7 -10    0.92    0.26
  -7  -7 -10    0.60    0.37
  -7   7 -10    0.69    0.33
  -7  -7 -10    0.10    0.33
   7   7  -9    0.09    0.23
  -7  -7  -9    0.72    0.36
  -7   7  -9    0.10    0.33
  -7  -7  -9    0.07    0.32
  -7  -7  -8    1.77    0.40
  -7   7  -8    1.60    0.36
  -7  -7  -8    1.36    0.37
  -7   7  -7    0.27    0.31
  -7  -7  -7   -0.03    0.34
   7  -7  -7    1.43    0.43
  -7   7  -7    1.02    0.49
  -7  -7  -7    0.30    0.32
   7  -7  -6    1.95    0.43
  -7   7  -6    0.99    0.43
  -7  -7  -6    1.69    0.34
   7  -7  -5    1.08    0.40
  -7   7  -5    1.08    0.44
  -7  -7  -5    0.95    0.33
   7  -7  -4    0.83    0.39
  -7   7  -4    0.99    0.39
  -7  -7  -4    0.70    0.31
  -7   7  -3    0.34    0.37
  -7  -7  -3    0.42    0.30
   7  -7  -3    0.45    0.40
  -7   7  -2    6.72    0.48
   7  -7  -2    6.23    0.51
   7  -7  -2    7.33    0.25
   7  -7  -1    0.28    0.34
  -7  -7  -1    0.68    0.33
  -7   7  -1    0.40    0.35
   7  -7  -1    0.83    0.41
   7  -7  -1    0.89    0.17
  -7  -7   0    4.12    0.27
   7  -7   0    4.21    0.26
   7  -7   0    4.23    0.48
   7  -7   0    4.26    0.39
  -7  -7   0    4.15    0.39
   7  -7   1    0.15    0.30
  -7  -7   1    0.35    0.31
  -7  -7   1    0.57    0.23
   7  -7   1    0.33    0.21
  -7  -7   2    6.22    0.33
   7  -7   2    7.66    0.38
   7  -7   2    6.48    0.44
  -7  -7   2    6.63    0.43
   7  -7   3    0.41    0.25
   7  -7   4    0.29    0.26
   7  -7   5    0.87    0.29
  -7   7   6    0.86    0.38
   7   7   6    0.98    0.38
   7  -7   6    0.75    0.32
  -7   7   7    0.47    0.40
   7   7   7    0.13    0.36
   7  -7   7    0.24    0.32
  -7   7   8    1.70    0.46
   7   7   8    1.66    0.40
   7  -7   8    1.81    0.36
  -7   7   9    0.30    0.45
   7   7   9   -0.15    0.39
  -7   7   9    0.07    0.31
  -7  -7   9    0.06    0.30
   7  -7   9    0.53    0.33
  -7   7  10    0.53    0.47
  -7   7  10    0.76    0.33
  -7  -7  10    0.40    0.34
   7   7  10    0.24    0.39
  -7   7  11    1.17    0.51
   7   7  11    0.42    0.42
  -7   7  11    0.42    0.32
  -7  -7  11   -0.08    0.32
  -7   7  12    0.54    0.54
   7   7  12    0.51    0.43
  -7   7  12    0.04    0.32
  -7  -7  12    0.28    0.32
  -7   7  13    0.32    0.61
   7   7  13    0.70    0.45
  -7   7  13    0.16    0.33
  -7  -7  13   -0.02    0.33
  -7   7  14    0.40    0.67
   7   7  14    0.80    0.48
  -7   7  14    0.07    0.36
  -7  -7  14    0.24    0.36
  -7   7  15    1.21    0.77
   7   7  15    1.48    0.54
  -7   7  15    0.27    0.36
  -7  -7  15   -0.10    0.37
  -7   7  16    0.59    0.87
   7   7  16    0.66    0.55
  -7   7  16   -0.30    0.41
  -7  -7  16   -0.40    0.41
  -7   7  17    1.33    0.98
   7   7  17    0.19    0.57
  -7   7  17    0.08    0.43
  -7  -7  17   -0.38    0.45
  -7  -9 -15    0.03    0.43
  -7  -9 -14    0.32    0.39
  -7  -9 -13   -0.31    0.41
   7   9 -12   -0.01    0.28
  -7  -9 -12   -0.16    0.36
   7   9 -11    0.17    0.27
  -7  -9 -11    0.13    0.33
  -7  -9 -10    0.56    0.35
  -7  -9 -10   -0.04    0.35
  -7   9 -10   -0.10    0.30
   7  -9  -9    0.31    0.42
  -7  -9  -9    0.26    0.35
  -7   9  -9    0.06    0.29
  -7  -9  -9    0.64    0.35
   7  -9  -8    0.48    0.43
  -7  -9  -8   -0.07    0.33
  -7   9  -8    0.66    0.29
  -7  -9  -8    0.29    0.33
   7  -9  -7    0.60    0.44
  -7  -9  -7    0.34    0.34
  -7   9  -7    0.24    0.28
  -7  -9  -7    0.94    0.35
  -7   9  -6    0.03    0.26
   7  -9  -6    0.51    0.45
  -7  -9  -6    0.34    0.33
  -7  -9  -6    0.34    0.35
  -7   9  -5    0.55    0.43
   7  -9  -5    1.41    0.45
  -7  -9  -5    0.41    0.33
  -7   9  -4    0.59    0.42
   7  -9  -4    0.48    0.45
  -7  -9  -4    0.12    0.30
  -7   9  -3    0.15    0.41
  -7  -9  -3    0.09    0.31
   7  -9  -3    0.20    0.42
   7  -9  -3    0.32    0.11
  -7  -9  -2    0.48    0.38
  -7   9  -2    0.17    0.39
  -7  -9  -2    0.53    0.33
   7  -9  -2   -0.04    0.45
   7  -9  -2    0.40    0.16
   7  -9  -2    0.52    0.38
   7  -9  -1    0.69    0.37
  -7  -9  -1    0.27    0.36
  -7  -9  -1    0.02    0.23
  -7  -9  -1   -0.10    0.30
   7  -9  -1   -0.02    0.45
   7  -9  -1    0.31    0.18
   7  -9   0    0.67    0.36
  -7  -9   0   -0.28    0.36
  -7  -9   0    0.09    0.23
   7  -9   0   -0.11    0.46
   7  -9   0    0.51    0.20
   7  -9   1    0.41    0.37
  -7  -9   1    0.27    0.35
  -7  -9   1    0.26    0.27
   7  -9   1    0.17    0.22
   7  -9   2    0.58    0.38
  -7  -9   2    0.18    0.34
  -7  -9   2    0.34    0.30
   7  -9   2    0.62    0.25
   7  -9   3    0.23    0.41
   7  -9   3    0.33    0.26
   7  -9   4    0.24    0.27
   7  -9   5    0.82    0.30
   7  -9   6    0.09    0.30
  -7   9   7    0.94    0.41
  -7   9   7    0.56    0.30
   7  -9   7    1.13    0.34
  -7  -9   8    0.36    0.26
  -7   9   8    0.24    0.39
   7   9   8   -0.03    0.39
  -7   9   8   -0.23    0.28
   7  -9   8    0.03    0.32
  -7  -9   9    0.05    0.26
  -7   9   9    0.40    0.43
   7   9   9    0.62    0.42
  -7   9   9    0.21    0.29
  -7   9  10    0.39    0.46
   7   9  10    0.38    0.40
  -7   9  10   -0.05    0.29
  -7  -9  10   -0.02    0.27
  -7   9  11    0.44    0.31
  -7   9  11    0.28    0.48
   7   9  11   -0.14    0.41
  -7  -9  11    0.21    0.29
  -7   9  12    0.63    0.54
   7   9  12    0.62    0.45
  -7   9  12    0.06    0.33
  -7  -9  12    0.50    0.31
   7   9  13   -0.58    0.46
  -7   9  13   -0.13    0.34
  -7  -9  13    0.35    0.31
   7   9  14    0.12    0.49
  -7   9  14    0.59    0.67
  -7   9  14    0.15    0.38
  -7  -9  14    0.16    0.32
  -7   9  15    0.29    0.75
   7   9  15    0.15    0.53
  -7   9  15   -0.50    0.40
  -7  -9  15   -0.12    0.35
  -7   9  16    0.20    0.80
   7   9  16    0.51    0.58
  -7  -9  16    0.53    0.39
  -7   9  16   -0.17    0.43
  -7 -11 -14   -0.51    0.45
  -7 -11 -13    0.44    0.43
  -7 -11 -12    0.05    0.39
   7 -11 -11    0.10    0.42
  -7 -11 -11   -0.25    0.39
   7 -11 -10    0.12    0.43
  -7 -11 -10    0.46    0.37
  -7  11 -10   -0.32    0.29
   7 -11  -9    0.35    0.45
  -7 -11  -9    0.34    0.35
  -7 -11  -9    0.04    0.35
  -7  11  -9    0.18    0.26
   7 -11  -8    0.02    0.44
  -7 -11  -8    0.18    0.34
  -7 -11  -8    0.55    0.35
  -7  11  -8    0.22    0.25
   7 -11  -7    0.11    0.46
  -7 -11  -7    0.03    0.34
  -7  11  -7    0.01    0.24
  -7 -11  -7    0.30    0.34
   7 -11  -6    0.75    0.48
  -7 -11  -6    0.47    0.33
  -7  11  -6    0.07    0.22
  -7 -11  -6    0.39    0.34
  -7 -11  -5    0.60    0.33
  -7  11  -5    0.38    0.22
   7 -11  -5    1.39    0.51
  -7 -11  -5    0.54    0.34
  -7 -11  -4    1.04    0.37
   7 -11  -4    0.25    0.49
  -7 -11  -3    0.14    0.34
   7 -11  -3    0.22    0.50
   7 -11  -3    0.31    0.15
   7 -11  -2   -0.05    0.40
  -7 -11  -2    0.08    0.43
  -7 -11  -2    0.22    0.25
  -7 -11  -2    0.31    0.34
   7 -11  -2    0.43    0.50
   7 -11  -2    0.19    0.18
   7 -11  -1    0.77    0.43
  -7 -11  -1    0.44    0.41
  -7 -11  -1    0.02    0.24
  -7 -11  -1    0.19    0.32
   7 -11  -1    0.09    0.49
   7 -11  -1    0.12    0.20
   7 -11   0    0.40    0.41
  -7 -11   0    0.07    0.39
  -7 -11   0    0.15    0.25
   7 -11   0    0.02    0.48
   7 -11   0    0.09    0.22
   7 -11   1    0.70    0.43
  -7 -11   1    0.32    0.42
  -7 -11   1    0.01    0.27
   7 -11   1    0.14    0.24
   7 -11   2   -0.24    0.45
  -7 -11   2    0.07    0.38
  -7 -11   2    0.36    0.32
   7 -11   2    0.36    0.26
   7 -11   3    0.69    0.50
  -7 -11   3    0.49    0.40
   7 -11   3    0.17    0.26
   7 -11   4    1.13    0.53
   7 -11   4    0.45    0.30
   7 -11   5    0.20    0.30
  -7 -11   6    0.21    0.19
  -7  11   6   -0.17    0.25
   7 -11   6    0.46    0.32
  -7 -11   7    0.32    0.19
  -7  11   7    0.32    0.27
  -7  11   8    0.22    0.27
  -7 -11   8    0.05    0.19
  -7  11   9    0.02    0.27
  -7 -11   9    0.09    0.21
  -7  11  10   -0.05    0.46
   7  11  10   -0.17    0.42
  -7  11  10    0.19    0.28
  -7 -11  10    0.01    0.20
  -7  11  11   -0.40    0.52
   7  11  11    0.44    0.46
  -7  11  11    0.25    0.30
  -7 -11  11   -0.13    0.22
  -7  11  12   -0.05    0.54
   7  11  12   -0.90    0.47
  -7  11  12    0.04    0.32
  -7 -11  12    0.32    0.24
  -7  11  13    0.68    0.60
   7  11  13   -0.05    0.49
  -7  11  13   -0.15    0.33
  -7 -11  13   -0.14    0.25
  -7  11  14    0.04    0.37
  -7  11  14   -0.52    0.67
   7  11  14    0.18    0.54
  -7 -11  14   -0.30    0.28
  -7 -11  15   -0.02    0.28
  -7  11  15    0.20    0.38
  -7  11  16   -0.16    0.39
   7 -13 -11    0.31    0.46
  -7 -13 -11    0.02    0.41
   7 -13 -10   -0.13    0.47
  -7 -13 -10    0.05    0.39
   7 -13  -9    0.56    0.49
  -7 -13  -9    0.42    0.38
   7 -13  -8    0.12    0.49
  -7 -13  -8    0.46    0.36
   7 -13  -7   -0.36    0.50
  -7 -13  -7    0.47    0.37
  -7 -13  -6    0.50    0.37
  -7  13  -6   -0.02    0.22
  -7 -13  -5    0.32    0.38
   7 -13  -5    0.26    0.55
  -7  13  -5    0.12    0.20
  -7 -13  -4    0.37    0.30
  -7 -13  -4    0.41    0.38
  -7  13  -4    0.34    0.19
   7 -13  -4    0.21    0.53
  -7 -13  -3    0.14    0.26
  -7  13  -3    0.03    0.19
  -7 -13  -3    0.90    0.39
   7 -13  -3   -0.16    0.53
  -7  13  -2    0.16    0.18
  -7 -13  -2    0.20    0.24
  -7 -13  -2    0.02    0.35
   7 -13  -2    0.16    0.56
  -7 -13  -1   -0.19    0.35
  -7 -13  -1    0.32    0.24
   7 -13  -1   -0.08    0.55
  -7 -13   0    0.19    0.35
  -7 -13   0    0.10    0.24
   7 -13   0   -0.13    0.53
  -7 -13   1    0.04    0.27
   7 -13   1   -0.12    0.25
  -7 -13   2    0.07    0.31
   7 -13   2    0.01    0.26
  -7  13   3   -0.11    0.21
   7 -13   3   -0.20    0.28
  -7  13   4    0.03    0.21
  -7 -13   4    0.25    0.11
   7 -13   4    0.27    0.30
  -7  13   5    0.21    0.22
  -7 -13   5    0.10    0.12
  -7  13   6    0.39    0.23
  -7 -13   6    0.02    0.12
  -7  13   7   -0.12    0.24
  -7 -13   7    0.24    0.14
  -7  13   8    0.10    0.25
  -7  13   9    0.09    0.27
  -7  13  10    0.09    0.28
  -7  13  11   -0.34    0.32
  -7  13  12    0.03    0.32
  -7  13  13   -0.33    0.32
   7 -15  -7   -0.49    0.56
  -7 -15  -7    0.33    0.42
  -7 -15  -6    0.63    0.44
   7 -15  -6    0.71    0.58
  -7 -15  -6    0.54    0.42
  -7 -15  -5    0.36    0.35
  -7 -15  -5   -0.16    0.42
   7 -15  -5    0.39    0.59
  -7 -15  -4    0.06    0.29
  -7 -15  -4    0.10    0.42
   7 -15  -4    0.20    0.60
  -7 -15  -3    0.42    0.27
  -7 -15  -3   -0.05    0.40
   7 -15  -3    0.24    0.61
  -7 -15  -2   -0.09    0.39
  -7 -15  -2    0.08    0.24
   7 -15  -2    0.52    0.63
  -7 -15  -1   -0.18    0.38
  -7 -15  -1    0.04    0.23
   7 -15  -1    0.49    0.63
  -7 -15   0    0.34    0.38
  -7 -15   0    0.06    0.24
  -7 -15   1    0.07    0.26
  -7 -17  -6    0.15    0.39
  -7 -17  -5   -0.28    0.31
  -7 -17  -4   -0.15    0.27
  -8   0 -15   -0.23    0.40
  -8   0 -14    0.36    0.39
  -8   0 -13    0.28    0.38
  -8   0 -10    1.93    0.37
  -8   0  -8    2.22    0.33
  -8   0  -7   -0.08    0.27
   8   0  -6    4.78    0.24
  -8   0  -6    5.55    0.38
   8   0  -5    0.12    0.14
  -8   0  -5   -0.15    0.25
  -8   0  -4    0.53    0.25
  -8   0  -3   -0.05    0.23
  -8   0  -2   29.49    0.87
  -8   0  -1    0.19    0.21
  -8   0  -1   -0.15    0.21
  -8   0   0   21.53    0.60
  -8   0   0   20.82    0.66
  -8   0   1    0.02    0.18
   8   0   2   29.69    0.82
  -8   0   2   28.51    0.80
  -8   0   3    0.08    0.12
   8   0   3    0.00    0.10
   8   0   3    0.18    0.20
  -8   0   3    0.12    0.16
  -8   0   4    0.57    0.17
   8   0   4    0.71    0.22
  -8   0   5    0.15    0.15
   8   0   5   -0.13    0.21
   8   0   6    5.03    0.34
   8   0   7    0.01    0.24
   8   0   8    2.22    0.30
   8   0   9    0.15    0.26
   8   0  10    3.67    0.38
  -8   0  11    0.02    0.36
  -8   0  12    1.81    0.41
  -8   0  13    0.34    0.22
  -8   0  13    0.34    0.37
  -8   0  14    0.23    0.36
  -8   0  14   -0.08    0.21
  -8   0  15   -0.16    0.39
  -8   0  15    0.22    0.24
  -8   0  16    0.06    0.39
  -8   0  17   -0.20    0.41
  -8  -2 -17   -0.14    0.43
  -8  -2 -16    0.19    0.40
  -8  -2 -15    0.53    0.40
  -8  -2 -14   -0.05    0.35
  -8  -2 -13    0.38    0.36
  -8  -2 -12    0.62    0.36
  -8   2 -11    0.44    0.37
  -8  -2 -11    0.52    0.35
  -8   2 -10    4.11    0.46
  -8   2  -9    0.67    0.33
  -8   2  -8    1.63    0.33
   8  -2  -7    0.58    0.24
  -8   2  -7    0.70    0.29
   8  -2  -6    4.30    0.31
  -8  -2  -6    4.73    0.37
  -8   2  -6    4.89    0.38
   8  -2  -5    0.14    0.22
  -8  -2  -5    0.29    0.24
  -8   2  -5   -0.09    0.23
   8  -2  -4    1.49    0.25
  -8  -2  -4    2.28    0.29
  -8   2  -4    1.72    0.26
  -8   2  -3    3.55    0.30
  -8   2  -3    2.80    0.34
  -8   2  -2   23.57    0.73
  -8  -2  -2   23.52    0.75
  -8   2  -2   23.99    0.73
  -8   2  -1    1.55    0.28
  -8  -2  -1    1.65    0.26
  -8   2  -1    1.71    0.23
  -8  -2   0   24.27    0.63
  -8  -2   0   23.89    0.75
  -8   2   0   25.65    0.73
   8  -2   0   25.65    0.70
  -8   2   0   26.69    0.75
   8  -2   1    1.57    0.21
  -8  -2   1    1.57    0.24
  -8   2   1    1.50    0.21
  -8  -2   2   22.31    0.66
   8  -2   2   22.40    0.65
  -8   2   2   21.39    0.61
  -8  -2   2   21.95    0.53
   8   2   3    3.52    0.27
  -8  -2   3    2.64    0.24
   8  -2   3    3.41    0.27
  -8   2   3    2.88    0.20
  -8   2   4    1.87    0.21
   8   2   4    1.69    0.21
  -8  -2   4    1.21    0.20
   8   2   4    1.63    0.23
   8  -2   4    1.53    0.24
  -8   2   4    1.53    0.16
  -8   2   5    0.33    0.22
   8   2   5    0.36    0.21
   8   2   5    0.33    0.21
   8  -2   5    0.30    0.22
  -8   2   5    0.15    0.12
   8   2   6    3.71    0.32
  -8   2   6    3.67    0.19
   8  -2   6    4.67    0.33
   8   2   6    4.48    0.32
  -8   2   7    0.30    0.13
   8  -2   7    0.25    0.26
  -8   2   8    1.30    0.16
   8   2   8    1.57    0.29
   8  -2   8    1.76    0.31
  -8   2   9    0.33    0.14
   8   2   9    0.86    0.28
   8  -2   9    0.51    0.30
  -8   2  10    2.30    0.19
   8  -2  10    3.63    0.37
  -8  -2  11    0.59    0.37
  -8   2  11    0.34    0.16
  -8  -2  12    0.54    0.37
  -8   2  12    0.50    0.18
  -8   2  13    0.09    0.18
  -8  -2  13    0.07    0.37
  -8   2  14   -0.25    0.38
  -8  -2  14    0.26    0.38
  -8   2  14    0.04    0.19
  -8  -2  15   -0.12    0.27
  -8   2  15    0.29    0.38
  -8  -2  15    0.32    0.39
  -8   2  16    0.20    0.42
  -8  -2  16    0.23    0.40
  -8   2  17    0.06    0.40
  -8  -2  17    0.73    0.42
  -8  -4 -16   -0.13    0.42
  -8  -4 -15    0.40    0.39
  -8  -4 -14   -0.22    0.38
  -8  -4 -13    0.58    0.35
  -8  -4 -12    0.68    0.36
  -8  -4 -11    0.43    0.33
   8   4 -10    1.36    0.23
  -8  -4 -10    1.94    0.38
  -8   4  -9    0.17    0.31
  -8  -4  -9    0.44    0.33
   8   4  -9    0.64    0.18
  -8  -4  -9    0.91    0.35
  -8  -4  -8    0.58    0.32
   8  -4  -7    1.07    0.31
   8  -4  -6    2.87    0.34
  -8   4  -6    3.55    0.47
  -8   4  -5   -0.17    0.26
   8  -4  -5    0.03    0.28
  -8   4  -5   -0.06    0.36
   8  -4  -4    3.40    0.35
  -8   4  -4    3.28    0.32
  -8   4  -4    3.37    0.39
  -8   4  -3    0.74    0.25
  -8   4  -3    0.90    0.34
  -8  -4  -3    0.56    0.27
   8  -4  -3    1.10    0.32
  -8   4  -2    5.42    0.40
   8  -4  -2    5.10    0.40
  -8  -4  -2    4.43    0.36
  -8   4  -2    4.33    0.32
  -8   4  -1    2.23    0.25
   8  -4  -1    2.48    0.20
  -8   4  -1    3.06    0.36
  -8  -4  -1    2.42    0.31
  -8   4   0   15.31    0.58
  -8  -4   0   15.10    0.58
   8  -4   0   15.26    0.48
  -8   4   0   14.48    0.50
  -8  -4   1    2.56    0.29
   8  -4   1    2.28    0.23
  -8  -4   1    2.56    0.25
  -8   4   1    2.31    0.22
   8  -4   1    3.01    0.26
  -8  -4   2    4.13    0.32
   8  -4   2    5.02    0.29
   8  -4   2    4.05    0.27
  -8  -4   2    4.36    0.28
   8  -4   3    0.91    0.23
   8  -4   4    3.45    0.30
  -8   4   4    3.07    0.29
  -8   4   5    0.19    0.26
   8   4   5   -0.06    0.26
   8  -4   5    0.03    0.23
  -8   4   6    3.02    0.34
   8  -4   6    3.84    0.34
   8   4   6    2.82    0.30
   8   4   6    3.20    0.35
  -8   4   7    0.84    0.33
   8   4   7    1.07    0.32
   8   4   7    0.78    0.26
   8  -4   7    0.66    0.29
  -8   4   8    1.70    0.42
   8   4   8    1.11    0.35
   8   4   8    0.92    0.29
   8  -4   8    0.75    0.30
  -8   4   9    0.97    0.46
   8   4   9    1.49    0.39
   8  -4   9    0.66    0.33
  -8   4  10    1.79    0.40
  -8   4  10    2.34    0.55
   8   4  10    2.20    0.43
  -8   4  11    0.18    0.35
  -8  -4  11    0.07    0.35
  -8   4  12    0.19    0.35
  -8  -4  12   -0.02    0.35
  -8   4  13    0.24    0.35
  -8  -4  13   -0.02    0.36
  -8   4  14    0.23    0.37
  -8  -4  14    0.05    0.38
  -8   4  15   -0.34    0.38
  -8  -4  15   -0.19    0.40
  -8   4  16   -0.20    0.40
  -8  -4  16    0.52    0.42
  -8  -6 -16    0.03    0.42
  -8  -6 -15    0.94    0.43
  -8  -6 -14    0.12    0.37
   8   6 -13   -0.49    0.27
  -8  -6 -13    0.28    0.38
   8   6 -12    0.02    0.25
  -8  -6 -12    0.18    0.34
   8   6 -11    0.09    0.22
  -8  -6 -11   -0.23    0.34
   8   6 -10    0.64    0.20
  -8  -6 -10    0.58    0.36
  -8  -6  -9   -0.23    0.35
  -8   6  -9    0.24    0.32
  -8  -6  -9    0.55    0.33
  -8   6  -8    0.05    0.30
  -8  -6  -8    0.33    0.35
   8  -6  -8    0.61    0.37
  -8  -6  -8    0.40    0.32
  -8   6  -8    1.30    0.54
   8  -6  -7    1.11    0.37
  -8   6  -7    1.10    0.49
  -8  -6  -7    0.73    0.33
   8  -6  -6    2.23    0.39
  -8   6  -6    2.84    0.49
  -8  -6  -6    1.76    0.35
   8  -6  -5    0.67    0.36
  -8   6  -5    0.05    0.39
  -8   6  -4    3.46    0.45
   8  -6  -4    2.01    0.39
  -8   6  -3    1.87    0.38
   8  -6  -3    0.73    0.37
  -8   6  -2    0.74    0.35
   8  -6  -2    0.21    0.12
   8  -6  -2    0.25    0.39
  -8   6  -1    1.09    0.34
  -8  -6  -1    1.17    0.30
   8  -6  -1    1.08    0.17
   8  -6   0    1.44    0.32
  -8  -6   0    1.31    0.29
  -8  -6   0    1.18    0.17
  -8  -6   0    1.27    0.30
   8  -6   0    1.47    0.20
   8  -6   1    1.30    0.29
  -8  -6   1    1.06    0.29
  -8  -6   1    0.67    0.28
  -8  -6   1    0.84    0.17
   8  -6   1    0.85    0.21
   8  -6   2    0.07    0.26
  -8  -6   2   -0.12    0.26
   8  -6   2    0.22    0.21
   8  -6   3    0.69    0.24
   8  -6   4    2.44    0.31
   8  -6   5    0.71    0.29
  -8   6   6    1.64    0.35
   8   6   6    2.25    0.37
  -8   6   7    0.67    0.35
   8   6   7    0.62    0.35
   8  -6   7    0.58    0.31
   8   6   8    0.59    0.35
  -8   6   8    0.31    0.38
   8  -6   8    0.50    0.33
  -8   6   9    0.33    0.41
   8   6   9    0.96    0.37
   8  -6   9    0.31    0.32
  -8   6  10    0.44    0.46
   8   6  10    0.46    0.37
  -8  -6  10    0.44    0.37
  -8   6  10    0.21    0.33
  -8   6  11    0.11    0.50
   8   6  11    0.96    0.41
  -8   6  11    0.13    0.34
  -8  -6  11    0.27    0.34
  -8   6  12    0.70    0.58
   8   6  12    0.68    0.42
  -8   6  12   -0.07    0.34
  -8  -6  12    0.10    0.35
  -8   6  13    1.43    0.67
   8   6  13    1.01    0.47
  -8   6  13    0.26    0.36
  -8  -6  13    0.37    0.38
  -8   6  14    0.22    0.73
   8   6  14    1.32    0.50
  -8   6  14   -0.03    0.37
  -8  -6  14   -0.03    0.39
  -8   6  15    1.44    0.94
   8   6  15    0.88    0.52
  -8   6  15    0.13    0.39
  -8  -6  15    0.25    0.40
   8   6  16    0.08    0.54
  -8   6  16    0.08    0.39
  -8  -6  16    0.31    0.41
  -8   6  16    0.92    1.03
  -8   6  17    0.82    1.16
   8   6  17    0.70    0.59
  -8  -8 -15    0.11    0.43
  -8  -8 -14    0.23    0.40
  -8  -8 -13    0.02    0.39
   8   8 -12   -0.11    0.24
  -8  -8 -12   -0.26    0.39
  -8  -8 -11   -0.11    0.36
   8  -8 -10    0.16    0.41
  -8  -8 -10    0.19    0.34
   8  -8  -9    0.55    0.42
  -8  -8  -9    0.47    0.40
  -8   8  -9    0.03    0.31
  -8  -8  -9   -0.35    0.34
  -8  -8  -8   -0.52    0.38
  -8   8  -8    0.13    0.29
   8  -8  -8    0.38    0.43
  -8  -8  -8    0.20    0.35
   8  -8  -7    0.66    0.43
  -8  -8  -7   -0.06    0.33
   8  -8  -6    1.44    0.42
  -8   8  -6    0.70    0.46
  -8  -8  -6    0.71    0.34
  -8   8  -5    0.31    0.43
   8  -8  -5    0.63    0.42
  -8  -8  -5    0.11    0.32
  -8   8  -4    0.89    0.42
  -8  -8  -4    1.06    0.33
   8  -8  -4    1.36    0.43
  -8   8  -3    0.33    0.39
   8  -8  -3    0.17    0.42
  -8   8  -2    0.07    0.36
   8  -8  -2    0.10    0.13
   8  -8  -2    0.05    0.42
  -8  -8  -1    0.40    0.36
   8  -8  -1    0.40    0.17
   8  -8  -1    0.42    0.35
   8  -8  -1    0.23    0.43
   8  -8   0    0.05    0.32
  -8  -8   0    0.22    0.33
  -8  -8   0    0.17    0.19
   8  -8   0    0.03    0.18
   8  -8   1    0.57    0.33
  -8  -8   1   -0.06    0.32
  -8  -8   1   -0.11    0.29
  -8  -8   1    0.21    0.23
   8  -8   1    0.12    0.21
   8  -8   2    0.15    0.33
  -8  -8   2    0.35    0.33
   8  -8   2    0.40    0.24
   8  -8   3    0.31    0.33
  -8  -8   3    0.58    0.31
   8  -8   3    0.08    0.26
   8  -8   4    0.61    0.29
   8  -8   5   -0.36    0.30
   8  -8   6    0.98    0.33
  -8   8   7   -0.05    0.36
   8  -8   7    0.34    0.33
  -8   8   8    0.49    0.38
   8   8   8    0.03    0.36
   8  -8   8    0.03    0.33
  -8   8   9    0.37    0.40
   8   8   9    0.52    0.38
  -8  -8   9    0.38    0.32
  -8   8   9   -0.08    0.30
  -8   8  10    0.02    0.43
   8   8  10    0.14    0.38
  -8   8  10   -0.04    0.31
  -8  -8  10   -0.06    0.30
  -8   8  11    0.75    0.51
   8   8  11   -0.19    0.39
  -8   8  11    0.30    0.33
  -8  -8  11   -0.19    0.31
  -8   8  12   -0.24    0.54
   8   8  12    1.04    0.45
  -8   8  12    0.22    0.34
  -8  -8  12   -0.06    0.32
  -8   8  13    0.32    0.37
  -8  -8  13    0.23    0.35
  -8   8  13    0.03    0.61
   8   8  13    0.59    0.47
  -8   8  14   -0.13    0.68
   8   8  14   -0.09    0.49
  -8   8  14    0.71    0.41
  -8  -8  14    0.22    0.38
  -8   8  15    0.84    0.81
   8   8  15    0.92    0.52
  -8   8  15   -0.02    0.39
  -8  -8  15    0.22    0.39
  -8   8  16    1.13    0.92
   8   8  16   -0.23    0.53
  -8   8  16   -0.25    0.43
  -8  -8  16    0.45    0.42
  -8 -10 -13    0.03    0.42
   8 -10 -12   -0.13    0.48
  -8 -10 -12   -0.17    0.41
   8 -10 -11    0.08    0.48
  -8 -10 -11   -0.09    0.37
   8 -10 -10   -0.11    0.46
  -8 -10 -10   -0.05    0.37
   8 -10  -9    0.02    0.45
  -8  10  -9   -0.12    0.28
  -8 -10  -9    0.31    0.37
   8 -10  -8   -0.06    0.46
  -8 -10  -8    0.06    0.38
  -8  10  -8    0.28    0.29
  -8 -10  -8    0.21    0.35
  -8 -10  -7    0.20    0.38
  -8  10  -7   -0.01    0.27
   8 -10  -7    0.64    0.47
  -8 -10  -7    0.25    0.34
  -8  10  -6    0.46    0.27
  -8 -10  -6    0.06    0.36
   8 -10  -6    0.97    0.47
  -8 -10  -6    0.10    0.34
   8 -10  -5    0.61    0.50
  -8 -10  -5    0.32    0.35
  -8 -10  -4    0.16    0.35
   8 -10  -4    0.31    0.45
  -8 -10  -3    0.50    0.36
   8 -10  -3    0.14    0.46
  -8 -10  -2    0.29    0.18
  -8 -10  -2    0.49    0.34
   8 -10  -2    0.23    0.14
   8 -10  -2    0.23    0.48
   8 -10  -1    0.46    0.40
  -8 -10  -1    0.05    0.40
  -8 -10  -1    0.07    0.19
  -8 -10  -1    0.06    0.33
   8 -10  -1    0.37    0.18
   8 -10  -1   -0.19    0.46
   8 -10   0    0.10    0.36
  -8 -10   0    0.15    0.21
   8 -10   0   -0.10    0.21
  -8 -10   0    0.08    0.38
   8 -10   1    0.31    0.38
  -8 -10   1    0.34    0.37
  -8 -10   1    0.28    0.26
   8 -10   1    0.21    0.23
   8 -10   2    0.37    0.40
  -8 -10   2    0.50    0.37
   8 -10   2    0.64    0.25
   8 -10   3    0.27    0.41
  -8 -10   3    0.53    0.37
   8 -10   3    0.83    0.28
   8 -10   4    0.73    0.44
  -8 -10   4    0.53    0.37
   8 -10   4    0.44    0.29
   8 -10   5    0.22    0.30
   8 -10   6    0.22    0.31
  -8  10   7    0.43    0.30
  -8 -10   8    0.28    0.24
  -8  10   8   -0.15    0.29
  -8  10   9    0.02    0.30
  -8 -10   9    0.15    0.24
  -8  10  10   -0.20    0.45
   8  10  10   -0.08    0.40
  -8  10  10   -0.19    0.31
  -8 -10  10    0.14    0.25
  -8  10  11    0.14    0.48
   8  10  11    0.02    0.43
  -8  10  11    0.12    0.32
  -8 -10  11   -0.06    0.25
  -8  10  12    0.82    0.57
   8  10  12    0.80    0.46
  -8  10  12   -0.08    0.35
  -8 -10  12   -0.08    0.27
   8  10  13    0.70    0.48
  -8  10  13   -0.02    0.36
  -8 -10  13   -0.14    0.30
  -8  10  14    0.36    0.70
   8  10  14    0.07    0.50
  -8  10  14    0.02    0.37
  -8 -10  14    0.29    0.31
  -8  10  15   -0.44    0.78
   8  10  15    0.33    0.53
  -8  10  15   -0.21    0.41
  -8 -10  15   -0.34    0.35
   8 -12 -12    0.44    0.51
   8 -12 -11    0.19    0.50
  -8 -12 -11   -0.07    0.42
   8 -12 -10    0.45    0.51
  -8 -12 -10    0.31    0.40
   8 -12  -9    0.02    0.52
  -8 -12  -9    0.02    0.40
   8 -12  -8    0.39    0.53
  -8 -12  -8    0.74    0.39
  -8  12  -8   -0.24    0.26
   8 -12  -7    0.41    0.53
  -8  12  -7    0.16    0.24
  -8 -12  -7    0.23    0.39
  -8  12  -6    0.18    0.24
   8 -12  -6    0.82    0.54
  -8 -12  -6    0.04    0.36
  -8  12  -5    0.01    0.22
  -8 -12  -5    0.83    0.40
   8 -12  -5    0.27    0.52
  -8  12  -4    0.06    0.22
  -8 -12  -4    0.51    0.38
  -8 -12  -3    0.34    0.20
  -8 -12  -3    0.18    0.38
   8 -12  -3    0.10    0.52
  -8 -12  -2    0.16    0.18
  -8 -12  -2   -0.07    0.36
   8 -12  -2    0.17    0.52
   8 -12  -1    0.56    0.46
  -8 -12  -1   -0.17    0.36
  -8 -12  -1    0.16    0.19
  -8 -12  -1    0.73    0.47
   8 -12  -1    0.49    0.51
   8 -12   0    0.35    0.44
  -8 -12   0    0.62    0.44
  -8 -12   0    0.21    0.36
  -8 -12   0    0.08    0.21
   8 -12   1    0.32    0.44
  -8 -12   1    0.38    0.43
  -8 -12   1    0.19    0.26
   8 -12   1   -0.12    0.23
   8 -12   2    0.06    0.47
   8 -12   2    0.12    0.25
   8 -12   3    0.44    0.28
   8 -12   4    0.52    0.30
  -8  12   5    0.22    0.26
   8 -12   5    0.14    0.31
  -8 -12   6    0.04    0.16
  -8  12   6    0.34    0.27
  -8 -12   7    0.09    0.16
  -8  12   7    0.16    0.27
  -8  12   8    0.09    0.29
  -8 -12   8    0.15    0.17
  -8  12   9   -0.18    0.30
  -8 -12   9    0.02    0.18
  -8  12  10   -0.02    0.32
  -8 -12  10    0.11    0.19
  -8  12  11    0.18    0.33
  -8 -12  11   -0.17    0.20
  -8  12  12    0.17    0.34
  -8  12  13    0.12    0.61
   8  12  13   -0.95    0.51
  -8  12  13   -0.56    0.37
  -8  12  14   -0.04    0.39
  -8  12  15   -0.43    0.40
   8 -14  -8    0.42    0.58
   8 -14  -7    1.25    0.62
  -8 -14  -7   -0.02    0.42
  -8 -14  -6    0.02    0.41
   8 -14  -6    1.00    0.59
  -8 -14  -5    0.26    0.25
  -8 -14  -5   -0.10    0.41
   8 -14  -5    0.23    0.59
  -8 -14  -4    0.16    0.20
  -8 -14  -4    0.44    0.43
   8 -14  -4    0.46    0.63
  -8 -14  -3    0.23    0.19
  -8 -14  -3    0.24    0.42
   8 -14  -3   -0.06    0.61
  -8 -14  -2    0.69    0.41
  -8 -14  -2    0.05    0.18
   8 -14  -2    0.52    0.59
  -8 -14  -1   -0.14    0.40
  -8 -14  -1   -0.05    0.19
   8 -14  -1   -0.29    0.60
  -8 -14   0    0.11    0.37
  -8 -14   0   -0.07    0.21
  -8 -14   1    0.60    0.42
  -8 -14   1   -0.01    0.24
  -8  14   3   -0.14    0.22
  -8  14   4    0.12    0.23
  -8  14   5    0.10    0.24
  -8  14   6    0.36    0.25
  -9  -1 -16    0.17    0.43
  -9  -1 -15    0.05    0.40
  -9  -1 -14    0.23    0.39
  -9   1 -12    0.58    0.41
  -9   1 -11    0.46    0.38
  -9   1 -10    1.33    0.39
  -9  -1  -9   -0.21    0.34
  -9   1  -9    0.15    0.33
   9   1  -8    1.39    0.15
   9  -1  -8    1.59    0.25
  -9  -1  -8    1.39    0.35
  -9   1  -8    2.01    0.38
   9  -1  -7    0.05    0.21
  -9  -1  -7    0.26    0.28
  -9   1  -7    0.09    0.29
   9  -1  -6    1.33    0.22
  -9  -1  -6    1.95    0.34
  -9   1  -6    1.87    0.32
  -9  -1  -5   -0.38    0.29
  -9   1  -5    0.19    0.26
  -9   1  -4    3.75    0.35
  -9  -1  -4    2.90    0.33
  -9  -1  -3    0.17    0.26
  -9   1  -3   -0.20    0.29
  -9   1  -3    0.01    0.25
  -9   1  -2    7.28    0.38
  -9  -1  -2    6.92    0.41
  -9   1  -2    7.05    0.42
  -9   1  -1    0.80    0.26
  -9  -1  -1    0.40    0.21
  -9  -1  -1    0.78    0.27
  -9   1  -1    0.03    0.25
  -9   1   0    7.16    0.36
  -9  -1   0    8.06    0.30
  -9  -1   0    6.92    0.39
  -9   1   0    6.57    0.38
   9  -1   1    1.22    0.23
  -9  -1   1    0.96    0.25
  -9   1   1    0.96    0.23
   9  -1   2    7.78    0.37
  -9  -1   2    7.84    0.37
  -9   1   2    6.80    0.35
   9   1   3    1.19    0.24
   9  -1   3    0.64    0.23
  -9  -1   3    0.55    0.21
   9   1   4    3.53    0.30
  -9  -1   4    2.67    0.25
   9  -1   4    3.53    0.31
  -9   1   4    2.69    0.24
  -9   1   4    2.66    0.20
   9   1   4    3.00    0.20
  -9   1   5    0.55    0.21
  -9  -1   5   -0.13    0.19
   9   1   5    0.38    0.24
   9  -1   5   -0.26    0.23
  -9   1   5    0.11    0.18
   9   1   5    0.50    0.20
  -9  -1   6    1.01    0.19
   9   1   6    2.06    0.30
  -9   1   6    1.62    0.20
   9  -1   6    1.66    0.28
  -9   1   7    0.27    0.17
   9   1   7    0.32    0.26
   9  -1   7   -0.06    0.26
  -9   1   8    1.58    0.20
   9   1   8    1.76    0.30
   9  -1   8    1.71    0.30
  -9   1   9    0.37    0.16
   9  -1   9    0.55    0.30
  -9  -1  12    0.50    0.38
  -9   1  12    0.21    0.18
  -9  -1  13    0.21    0.38
  -9   1  13   -0.01    0.18
  -9  -1  14    0.92    0.41
  -9  -1  14    0.11    0.24
  -9  -1  15    0.06    0.40
  -9  -1  16    0.73    0.45
  -9  -3 -16   -0.06    0.43
  -9  -3 -15    0.31    0.41
  -9  -3 -14    0.32    0.38
  -9  -3 -13    0.58    0.38
  -9  -3 -12    0.90    0.38
   9   3 -10    0.48    0.15
  -9   3  -9   -0.36    0.35
   9  -3  -9    0.61    0.29
  -9   3  -8    1.99    0.38
   9  -3  -8    1.92    0.31
  -9   3  -7    0.21    0.31
   9  -3  -7    0.17    0.27
  -9  -3  -7    0.04    0.32
  -9   3  -6    1.61    0.33
   9  -3  -6    1.33    0.29
  -9  -3  -6    1.34    0.33
   9  -3  -5   -0.06    0.27
  -9  -3  -5    0.17    0.28
  -9   3  -5   -0.01    0.36
  -9   3  -5    0.09    0.28
  -9   3  -4    1.33    0.36
  -9  -3  -4    1.64    0.31
   9  -3  -4    1.43    0.31
  -9   3  -4    1.43    0.30
  -9   3  -3   -0.11    0.31
  -9  -3  -3    0.14    0.27
  -9   3  -3   -0.09    0.25
  -9   3  -2    5.82    0.39
  -9  -3  -2    6.19    0.40
  -9   3  -2    5.42    0.36
  -9  -3  -1    3.61    0.34
  -9   3  -1    3.16    0.35
  -9   3  -1    3.55    0.30
  -9  -3   0    2.87    0.15
  -9   3   0    3.17    0.34
  -9  -3   0    3.52    0.34
  -9   3   0    3.42    0.28
   9  -3   1    3.26    0.27
  -9  -3   1    3.28    0.32
  -9   3   1    2.96    0.26
  -9  -3   2    4.53    0.34
   9  -3   2    5.14    0.32
  -9   3   2    4.94    0.27
   9  -3   2    4.09    0.21
  -9  -3   2    4.27    0.21
   9  -3   3   -0.03    0.17
  -9  -3   3   -0.37    0.23
   9  -3   3   -0.09    0.23
  -9   3   3    0.28    0.16
  -9  -3   4    0.68    0.22
   9  -3   4    0.99    0.26
  -9   3   4    1.10    0.16
  -9   3   5    0.21    0.22
   9   3   5    0.02    0.23
   9   3   5    0.05    0.24
   9  -3   5   -0.19    0.26
  -9   3   5    0.22    0.12
  -9   3   6    1.01    0.28
   9   3   6    1.43    0.28
   9   3   6    1.80    0.28
   9  -3   6    1.49    0.29
  -9   3   6    0.63    0.10
  -9   3   7    0.32    0.30
   9   3   7    0.24    0.28
   9   3   7    0.64    0.26
   9  -3   7    0.36    0.28
  -9   3   8    2.19    0.41
   9   3   8    2.46    0.34
   9  -3   8    1.98    0.34
   9   3   9    0.42    0.33
  -9   3   9    0.67    0.42
  -9   3  11    0.40    0.37
  -9  -3  11    0.34    0.37
  -9   3  12    0.59    0.38
  -9  -3  12    0.63    0.38
  -9   3  13   -0.26    0.38
  -9  -3  13   -0.42    0.38
  -9   3  14    0.37    0.39
  -9  -3  14    0.52    0.40
  -9   3  15    0.17    0.39
  -9  -3  15    0.51    0.42
  -9   3  16    0.40    0.42
  -9  -3  16    1.03    0.45
  -9  -5 -15    0.21    0.41
  -9  -5 -14   -0.08    0.39
  -9  -5 -13    0.26    0.36
   9   5 -12    0.06    0.19
  -9  -5 -12    0.23    0.36
   9   5 -11    0.10    0.14
  -9  -5 -11    0.09    0.36
  -9  -5 -10    0.42    0.35
   9  -5  -9    0.74    0.34
  -9  -5  -9    0.22    0.34
   9  -5  -8    0.84    0.34
  -9   5  -8    1.06    0.56
   9  -5  -7    0.51    0.33
  -9   5  -7   -0.20    0.47
   9  -5  -6    0.18    0.34
  -9   5  -6    1.08    0.46
   9  -5  -5    0.59    0.35
  -9   5  -5    0.33    0.39
  -9   5  -4    1.18    0.39
  -9  -5  -4    1.10    0.31
   9  -5  -4    1.18    0.37
  -9   5  -3    0.46    0.34
  -9  -5  -3    0.53    0.29
   9  -5  -3    0.35    0.36
  -9  -5  -2    3.30    0.36
  -9   5  -2    3.00    0.40
  -9   5  -1    1.07    0.34
   9  -5  -1    0.82    0.17
  -9  -5  -1    0.23    0.27
  -9  -5   0    2.80    0.16
   9  -5   0    3.19    0.25
  -9  -5   0    2.83    0.33
   9  -5   1    0.68    0.27
  -9  -5   1    0.57    0.25
  -9  -5   1    0.54    0.27
   9  -5   1    0.46    0.21
   9  -5   2    2.74    0.28
  -9  -5   2    2.74    0.31
   9  -5   2    2.29    0.28
  -9  -5   2    3.10    0.29
   9  -5   3    0.46    0.24
  -9  -5   3    0.14    0.24
  -9  -5   3   -0.27    0.26
   9  -5   3    0.29    0.23
   9  -5   4    1.00    0.27
   9  -5   5    0.45    0.27
  -9   5   6    0.07    0.28
   9   5   6   -0.02    0.30
   9  -5   6   -0.03    0.28
  -9   5   7    0.24    0.32
   9   5   7    0.26    0.31
   9  -5   7    0.01    0.30
  -9   5   8    1.13    0.36
   9   5   8    0.77    0.34
   9  -5   8    1.60    0.34
  -9   5   9    0.44    0.39
   9   5   9    0.38    0.34
  -9   5  10    0.22    0.43
   9   5  10    0.86    0.35
  -9   5  11    1.44    0.52
   9   5  11    0.86    0.38
  -9   5  11    0.02    0.34
  -9  -5  11    0.37    0.37
   9   5  12    0.68    0.40
  -9   5  12    0.10    0.35
  -9  -5  12   -0.20    0.36
  -9   5  13    0.49    0.72
   9   5  13    1.23    0.45
  -9   5  13   -0.05    0.38
  -9  -5  13    0.21    0.39
  -9   5  14   -0.12    0.84
   9   5  14    0.87    0.46
  -9   5  14   -0.08    0.39
  -9  -5  14    0.03    0.40
  -9   5  15    1.23    1.00
   9   5  15    0.38    0.48
  -9   5  15   -0.03    0.40
  -9  -5  15    0.37    0.42
  -9   5  16    0.64    1.13
   9   5  16    0.38    0.52
   9   5  17    0.55    0.55
  -9   5  17    3.27    1.38
  -9  -7 -14    0.23    0.42
  -9  -7 -13    0.33    0.39
  -9  -7 -12   -0.17    0.38
   9  -7 -11    0.63    0.41
  -9  -7 -11    0.07    0.37
   9  -7 -10    0.35    0.40
  -9  -7 -10   -0.29    0.35
   9  -7  -9   -0.28    0.37
  -9  -7  -9    0.13    0.35
   9  -7  -8    0.29    0.37
  -9  -7  -8    0.04    0.35
   9  -7  -7    0.15    0.39
  -9  -7  -7    0.14    0.35
   9  -7  -6    1.13    0.40
  -9   7  -6    0.24    0.43
  -9   7  -5   -0.03    0.40
   9  -7  -5   -0.12    0.39
  -9   7  -4    1.04    0.40
   9  -7  -4    0.34    0.39
  -9   7  -3    0.67    0.39
   9  -7  -3   -0.32    0.42
  -9   7  -2    0.07    0.35
  -9  -7  -2    0.17    0.29
   9  -7  -2    0.16    0.42
  -9  -7  -1    0.07    0.29
   9  -7  -1    0.04    0.16
   9  -7   0    0.27    0.31
  -9  -7   0    0.63    0.32
  -9  -7   0    0.50    0.17
  -9  -7   0    0.16    0.28
   9  -7   0    0.12    0.18
   9  -7   1    0.06    0.29
  -9  -7   1    0.32    0.30
  -9  -7   1    0.03    0.28
   9  -7   1    0.43    0.21
   9  -7   2    0.75    0.29
  -9  -7   2    0.43    0.30
  -9  -7   2    0.11    0.27
   9  -7   2    0.71    0.23
   9  -7   3    0.14    0.29
  -9  -7   3    0.51    0.29
   9  -7   3    0.25    0.25
   9  -7   4    0.30    0.27
   9  -7   5   -0.04    0.29
   9  -7   6    0.35    0.31
  -9   7   7    0.45    0.34
   9  -7   7    0.34    0.31
  -9   7   8    0.45    0.36
   9   7   8    0.29    0.35
  -9   7   9    0.52    0.38
   9   7   9   -0.20    0.35
  -9   7  10   -0.15    0.41
   9   7  10    0.36    0.36
  -9   7  10    0.22    0.33
  -9  -7  10   -0.09    0.34
  -9   7  11   -0.24    0.46
   9   7  11    0.39    0.38
  -9   7  11   -0.14    0.34
  -9  -7  11    0.05    0.35
  -9  -7  12    0.25    0.37
  -9   7  12    0.41    0.54
   9   7  12    0.66    0.41
  -9   7  12    0.31    0.36
  -9   7  13    0.21    0.61
   9   7  13    0.36    0.43
  -9   7  13    0.17    0.37
  -9  -7  13    0.64    0.40
  -9   7  14   -0.03    0.73
   9   7  14   -0.11    0.45
  -9   7  14   -0.41    0.41
  -9  -7  14   -0.03    0.40
  -9   7  15   -0.98    0.88
   9   7  15   -0.57    0.49
  -9   7  15    0.08    0.43
  -9  -7  15    0.39    0.45
  -9   7  16    0.48    1.03
   9   7  16    0.46    0.51
   9   7  17   -0.61    0.55
   9  -9 -13   -0.17    0.50
  -9  -9 -13   -0.37    0.46
   9  -9 -12   -0.21    0.49
  -9  -9 -12   -0.08    0.41
   9  -9 -11   -0.08    0.47
  -9  -9 -11    0.46    0.40
   9  -9 -10    0.86    0.47
  -9  -9 -10    0.05    0.38
   9  -9  -9    0.71    0.45
  -9  -9  -9    0.26    0.38
   9  -9  -8    0.13    0.43
  -9  -9  -8    0.46    0.36
  -9  -9  -7    0.64    0.40
   9  -9  -7   -0.13    0.42
  -9  -9  -7    0.20    0.36
   9  -9  -6    0.50    0.45
  -9  -9  -6    0.13    0.33
   9  -9  -5    0.90    0.44
  -9  -9  -5    0.10    0.37
  -9  -9  -4   -0.12    0.34
   9  -9  -4    0.26    0.45
   9  -9  -3    0.14    0.46
   9  -9  -2    0.28    0.12
   9  -9  -2   -0.14    0.45
  -9  -9  -1    0.32    0.15
   9  -9  -1    0.09    0.15
   9  -9   0    0.29    0.35
  -9  -9   0    0.12    0.36
  -9  -9   0    0.10    0.19
   9  -9   0    0.33    0.19
   9  -9   1    0.26    0.33
  -9  -9   1   -0.11    0.34
  -9  -9   1    0.11    0.31
  -9  -9   1    0.10    0.23
   9  -9   1    0.04    0.21
   9  -9   2   -0.15    0.33
  -9  -9   2    0.04    0.34
  -9  -9   2   -0.06    0.32
   9  -9   2    0.01    0.24
   9  -9   3    0.10    0.34
  -9  -9   3    0.44    0.33
   9  -9   3    0.46    0.27
   9  -9   4    0.02    0.36
  -9  -9   4    0.06    0.32
   9  -9   4    0.19    0.29
   9  -9   5    0.15    0.30
   9  -9   6    0.38    0.32
  -9   9   9   -0.24    0.39
  -9  -9   9    0.47    0.32
  -9   9   9    0.18    0.32
  -9   9  10   -0.18    0.42
   9   9  10    0.44    0.38
  -9   9  10    0.06    0.33
  -9  -9  10   -0.35    0.31
  -9   9  11   -0.72    0.49
   9   9  11    0.54    0.41
  -9   9  11   -0.22    0.36
  -9  -9  11   -0.12    0.32
  -9   9  12    0.28    0.53
   9   9  12    0.40    0.43
  -9   9  12    0.18    0.37
  -9  -9  12    0.08    0.34
  -9   9  13   -0.17    0.39
  -9   9  13   -0.20    0.61
  -9  -9  13    0.18    0.35
   9   9  13   -0.17    0.46
  -9   9  14    0.36    0.71
   9   9  14    0.04    0.48
  -9   9  14   -0.20    0.42
  -9  -9  14   -0.09    0.37
  -9   9  15   -0.04    0.82
   9   9  15    0.12    0.50
  -9   9  15    0.03    0.41
   9 -11 -13   -0.43    0.56
   9 -11 -12   -0.90    0.56
   9 -11 -11   -0.81    0.54
  -9 -11 -11    0.42    0.43
   9 -11 -10    0.24    0.53
  -9 -11 -10    0.23    0.41
   9 -11  -9    0.40    0.53
  -9 -11  -9    0.42    0.41
   9 -11  -8    0.53    0.52
  -9 -11  -8    0.55    0.40
  -9  11  -7    0.11    0.28
   9 -11  -7    0.42    0.50
  -9 -11  -7    0.38    0.38
  -9  11  -6   -0.09    0.25
  -9 -11  -6    0.34    0.41
   9 -11  -6   -0.02    0.49
  -9 -11  -6    0.33    0.39
  -9 -11  -5    0.39    0.39
   9 -11  -5    1.13    0.51
  -9 -11  -4    0.18    0.38
   9 -11  -4    0.41    0.50
  -9 -11  -3    0.14    0.15
  -9 -11  -3   -0.02    0.37
   9 -11  -3   -0.42    0.50
  -9 -11  -2    0.04    0.14
  -9 -11  -2   -0.07    0.36
   9 -11  -2    0.07    0.48
  -9 -11  -1    0.08    0.16
   9 -11  -1    0.61    0.42
  -9 -11  -1   -0.05    0.42
   9 -11   0   -0.05    0.40
  -9 -11   0    0.29    0.40
  -9 -11   0    0.12    0.20
   9 -11   1    0.33    0.39
  -9 -11   1    0.49    0.41
  -9 -11   1    0.14    0.25
   9 -11   1    0.08    0.22
   9 -11   2   -0.14    0.41
  -9 -11   2    0.30    0.39
   9 -11   2   -0.02    0.25
   9 -11   3   -0.07    0.42
  -9 -11   3   -0.30    0.38
   9 -11   3    0.06    0.27
   9 -11   4    0.14    0.44
  -9 -11   4    0.32    0.39
   9 -11   4   -0.01    0.29
   9 -11   5    0.30    0.45
  -9 -11   5    0.44    0.41
   9 -11   5   -0.50    0.33
  -9  11   7   -0.04    0.30
  -9 -11   8    0.41    0.24
  -9  11   8    0.27    0.31
  -9 -11   9   -0.16    0.24
  -9  11   9   -0.26    0.32
  -9  11  10   -0.06    0.34
  -9 -11  10   -0.21    0.24
  -9  11  11   -0.06    0.35
  -9 -11  11    0.26    0.26
  -9  11  12    0.78    0.57
  -9  11  12    0.02    0.37
  -9 -11  12    0.03    0.26
  -9  11  13   -0.75    0.62
   9  11  13   -0.22    0.48
  -9  11  13   -0.29    0.38
  -9 -11  13    0.03    0.28
   9  11  14    0.23    0.50
  -9  11  14    0.27    0.40
  -9 -11  14   -0.13    0.28
   9 -13 -10   -0.13    0.60
   9 -13  -9   -0.03    0.59
   9 -13  -8   -0.05    0.60
   9 -13  -7    0.78    0.60
  -9 -13  -7    0.76    0.44
  -9 -13  -6   -0.85    0.45
   9 -13  -6   -0.05    0.58
  -9 -13  -5    0.03    0.43
   9 -13  -5   -0.45    0.58
  -9 -13  -4    0.11    0.16
  -9 -13  -4    0.15    0.44
   9 -13  -4    0.93    0.61
  -9 -13  -3    0.05    0.14
  -9 -13  -3    0.42    0.42
   9 -13  -3    0.13    0.58
  -9 -13  -2   -0.07    0.14
   9 -13  -2   -0.75    0.57
  -9 -13  -1    0.17    0.42
  -9 -13  -1    0.01    0.16
  -9 -13   0    0.10    0.41
  -9  13   5    0.01    0.29
  -9  13   6   -0.01    0.29
  -9  13   7   -0.26    0.30
  -9  13   8   -0.08    0.31
  -9  13   9    0.02    0.33
  -9  13  10   -0.07    0.35
 -10   0 -12    0.07    0.37
 -10   0 -11    0.18    0.37
  10   0 -10    0.96    0.22
 -10   0 -10    0.95    0.40
  10   0  -9    0.34    0.19
 -10   0  -9    0.29    0.36
 -10   0  -8    0.79    0.36
 -10   0  -7    0.76    0.34
 -10   0  -6   -0.07    0.30
 -10   0  -5    0.36    0.30
 -10   0  -4    2.47    0.36
 -10   0  -3   -0.08    0.26
 -10   0  -3    0.30    0.31
 -10   0  -2    1.60    0.26
 -10   0  -2    1.39    0.33
 -10   0  -1    0.64    0.26
 -10   0  -1   -0.04    0.30
 -10   0   0   27.40    0.75
 -10   0   0   25.18    0.84
 -10   0   1   -0.16    0.28
 -10   0   2    1.09    0.29
  10   0   3    0.38    0.25
 -10   0   3   -0.16    0.25
  10   0   4    3.81    0.33
 -10   0   4    3.37    0.29
 -10   0   5    0.25    0.17
  10   0   5    0.35    0.17
  10   0   5    0.52    0.25
 -10   0   5    0.62    0.23
  10   0   6    0.14    0.26
 -10   0   6    0.27    0.21
 -10   0   7    0.07    0.21
  10   0   7   -0.01    0.28
 -10   0   8    0.85    0.21
 -10   0   9    0.42    0.18
 -10   0  12    0.11    0.38
 -10   0  13    0.19    0.38
 -10   0  14   -0.08    0.38
 -10   0  15    0.26    0.42
 -10  -2 -15    0.55    0.45
 -10   2 -12    0.02    0.38
 -10   2 -11    0.02    0.38
  10  -2 -11    0.49    0.27
  10   2 -11    0.21    0.11
 -10   2 -10    0.49    0.40
  10  -2 -10    0.94    0.28
 -10  -2 -10    0.71    0.38
 -10   2  -9    0.06    0.36
  10  -2  -9    0.42    0.26
 -10  -2  -9    0.19    0.36
  10  -2  -8    0.69    0.26
 -10  -2  -8    0.04    0.34
 -10   2  -8    0.04    0.33
  10  -2  -7    0.23    0.25
 -10  -2  -7    0.19    0.33
 -10   2  -7    0.33    0.32
  10  -2  -6   -0.01    0.24
 -10  -2  -6   -0.07    0.31
 -10   2  -6    0.20    0.30
 -10  -2  -5    0.22    0.31
 -10   2  -5    0.21    0.34
 -10   2  -5    0.13    0.29
 -10   2  -4    1.23    0.34
 -10  -2  -4    1.80    0.34
 -10   2  -4    2.20    0.33
 -10   2  -3    1.03    0.31
 -10  -2  -3    0.84    0.32
 -10   2  -3    1.33    0.30
 -10   2  -2    0.78    0.30
 -10  -2  -2    0.87    0.32
 -10   2  -2    1.05    0.28
 -10   2  -1    0.56    0.31
 -10  -2  -1    0.57    0.20
 -10  -2  -1    0.95    0.31
 -10   2  -1    1.27    0.29
 -10  -2   0   13.96    0.59
 -10   2   0   13.92    0.55
  10  -2   1    1.40    0.26
 -10  -2   1    0.96    0.30
 -10   2   1    0.71    0.27
  10  -2   2    1.02    0.27
 -10  -2   2    1.13    0.28
 -10   2   2    0.38    0.23
  10  -2   3    1.26    0.27
 -10  -2   3    0.67    0.26
 -10   2   3    1.20    0.23
  10  -2   4    1.14    0.12
 -10  -2   4    1.31    0.25
  10  -2   4    1.58    0.29
 -10   2   4    1.41    0.23
 -10   2   5   -0.08    0.19
  10   2   5    0.55    0.25
 -10  -2   5   -0.26    0.20
  10  -2   5    0.14    0.26
 -10   2   5    0.08    0.18
 -10   2   6    0.28    0.22
  10   2   6    0.40    0.23
 -10  -2   6   -0.01    0.18
  10   2   6    0.09    0.25
  10  -2   6    0.13    0.26
 -10   2   6    0.05    0.17
 -10   2   7    0.54    0.26
  10   2   7    0.29    0.26
 -10  -2   7    0.23    0.17
  10  -2   7    0.38    0.29
 -10   2   7    0.34    0.18
 -10   2   8    0.58    0.34
  10   2   8    1.30    0.30
 -10   2   8    0.72    0.18
 -10   2   9    0.83    0.19
 -10   2   9    0.83    0.41
  10   2   9    1.23    0.33
 -10   2  10    1.13    0.21
 -10   2  10    0.34    0.14
 -10   2  11    0.32    0.22
 -10   2  11    0.22    0.14
 -10   2  12    0.22    0.23
 -10   2  12    0.58    0.41
 -10   2  12    0.21    0.15
 -10  -2  12    0.21    0.39
 -10   2  13    0.31    0.24
 -10   2  13    0.90    0.41
 -10  -2  13    0.22    0.39
 -10   2  14    0.20    0.39
 -10  -2  14    0.20    0.40
 -10   2  15    0.46    0.42
 -10  -2  15    0.09    0.42
 -10  -4 -14    0.16    0.41
 -10  -4 -13    0.80    0.40
 -10  -4 -12    0.39    0.37
  10  -4 -11    0.48    0.32
  10  -4 -10    0.56    0.30
  10  -4  -9    0.64    0.31
  10  -4  -8    0.57    0.32
 -10   4  -8    0.36    0.53
  10  -4  -7    0.48    0.32
 -10   4  -7    0.09    0.46
 -10  -4  -7   -0.31    0.35
 -10   4  -6    0.14    0.30
  10  -4  -6    0.58    0.32
 -10   4  -6    0.40    0.41
 -10  -4  -6    0.22    0.33
 -10   4  -5    0.02    0.30
 -10   4  -5    0.01    0.36
 -10  -4  -5    0.73    0.33
  10  -4  -5    0.08    0.32
 -10   4  -4    0.22    0.30
 -10   4  -4    0.43    0.34
 -10  -4  -4    0.43    0.32
 -10   4  -3    0.48    0.30
 -10   4  -3    1.22    0.34
 -10  -4  -3    0.97    0.32
 -10   4  -2   -0.06    0.27
 -10   4  -2   -0.20    0.31
 -10  -4  -2    0.49    0.29
 -10   4  -1   -0.19    0.27
 -10   4  -1    0.73    0.34
 -10  -4  -1    0.69    0.29
 -10   4   0    0.71    0.26
  10  -4   0    1.11    0.22
 -10  -4   0    0.97    0.30
 -10   4   1    0.11    0.22
  10  -4   1    0.42    0.23
 -10  -4   1    0.26    0.28
 -10   4   2   -0.33    0.20
 -10  -4   2   -0.14    0.26
  10  -4   2   -0.11    0.24
 -10   4   3    0.40    0.17
  10  -4   3    0.51    0.21
 -10  -4   3    0.47    0.21
 -10  -4   3    0.66    0.26
  10  -4   3    0.43    0.26
  10  -4   4    0.20    0.20
 -10  -4   4    0.02    0.23
  10  -4   4   -0.07    0.26
 -10  -4   5    0.37    0.22
  10  -4   5    0.02    0.26
 -10   4   6    0.31    0.27
  10  -4   6    0.72    0.29
 -10   4   7    0.06    0.27
  10   4   7    0.15    0.28
  10  -4   7    0.45    0.29
 -10   4   8    0.62    0.31
  10   4   8    0.21    0.31
 -10   4   9    0.95    0.37
  10   4   9    0.42    0.31
 -10   4  10    1.18    0.43
  10   4  10    1.22    0.35
 -10   4  11    0.68    0.48
  10   4  11    1.58    0.38
  10   4  12    0.44    0.39
 -10   4  12   -0.15    0.36
 -10  -4  12    0.44    0.40
 -10   4  13    1.65    0.74
  10   4  13    0.60    0.43
 -10   4  13    0.21    0.39
 -10  -4  13    0.33    0.39
  10   4  14    0.39    0.43
 -10   4  14    0.19    0.40
 -10  -4  14   -0.15    0.42
 -10   4  15    0.51    0.43
  10   4  15   -0.02    0.45
 -10   4  16    1.08    1.21
  10   4  16    0.98    0.51
  10   4  17   -0.14    0.50
  10  -6 -13    0.27    0.39
 -10  -6 -13    0.18    0.42
  10  -6 -12    0.36    0.38
 -10  -6 -12   -0.18    0.40
  10  -6 -11    0.36    0.37
 -10  -6 -11   -0.24    0.39
  10  -6 -10    0.74    0.36
 -10  -6 -10   -0.33    0.38
  10  -6  -9    0.25    0.33
  10  -6  -8    0.63    0.36
  10  -6  -7    0.21    0.36
 -10   6  -6    0.79    0.43
  10  -6  -6    0.27    0.36
 -10   6  -5    0.05    0.39
 -10  -6  -5   -0.04    0.33
  10  -6  -5   -0.08    0.36
 -10   6  -4    0.58    0.37
 -10  -6  -4    0.04    0.32
  10  -6  -4    0.14    0.38
 -10   6  -3    0.23    0.34
 -10  -6  -3    0.39    0.31
 -10   6  -2    0.23    0.35
 -10  -6  -2    0.15    0.30
  10  -6  -1    0.17    0.16
 -10  -6  -1    0.20    0.28
  10  -6   0    0.14    0.19
 -10  -6   0    0.38    0.30
 -10  -6   1   -0.14    0.28
  10  -6   1    0.31    0.21
 -10  -6   1    0.49    0.25
  10  -6   2    0.12    0.25
 -10  -6   2    0.36    0.26
 -10  -6   2   -0.14    0.27
  10  -6   2   -0.10    0.22
  10  -6   3    0.15    0.25
 -10  -6   3    0.37    0.26
 -10  -6   3    0.27    0.26
  10  -6   3    0.50    0.25
  10  -6   4    0.16    0.25
 -10  -6   4    0.41    0.26
 -10  -6   4    0.47    0.25
  10  -6   4   -0.08    0.25
  10  -6   5    0.73    0.29
  10  -6   6    0.79    0.32
  10  -6   7    0.43    0.31
 -10   6   8   -0.25    0.31
  10   6   8   -0.22    0.33
 -10   6   9    0.28    0.35
  10   6   9    0.03    0.33
 -10   6  10    0.47    0.40
  10   6  10   -0.13    0.34
 -10   6  11    0.55    0.45
  10   6  11   -0.42    0.37
 -10   6  11    0.20    0.37
 -10  -6  11    0.13    0.41
 -10   6  12   -0.23    0.52
  10   6  12   -0.24    0.39
 -10   6  12   -0.45    0.39
 -10  -6  12    0.33    0.40
 -10   6  13    0.18    0.39
 -10   6  13   -0.63    0.61
  10   6  13    0.22    0.40
 -10  -6  13    0.42    0.43
 -10   6  14   -0.40    0.74
  10   6  14    0.04    0.44
 -10   6  14    0.03    0.40
 -10  -6  14   -0.20    0.42
 -10   6  15    0.16    0.87
  10   6  15    0.08    0.47
  10   6  16    0.02    0.48
  10   6  17    0.76    0.52
  10  -8 -16    0.47    0.52
  10  -8 -15   -0.17    0.50
  10  -8 -14   -0.38    0.48
  10  -8 -13   -0.04    0.47
  10  -8 -12   -0.21    0.46
 -10  -8 -12   -0.05    0.43
  10  -8 -11   -0.02    0.43
 -10  -8 -11   -0.54    0.43
  10  -8 -10    0.27    0.42
 -10  -8 -10   -0.15    0.40
  10  -8  -9    0.50    0.41
 -10  -8  -9    0.12    0.39
  10  -8  -8   -0.03    0.40
 -10  -8  -8    0.05    0.36
  10  -8  -7    0.81    0.43
 -10  -8  -7    0.37    0.38
  10  -8  -6    0.32    0.39
  10  -8  -5    0.12    0.41
  10  -8  -4   -0.32    0.43
 -10   8  -3    0.30    0.37
 -10  -8  -3    0.54    0.36
  10  -8  -3    0.44    0.43
 -10  -8  -2    0.41    0.34
 -10  -8  -1    0.29    0.13
  10  -8  -1    0.36    0.16
 -10  -8  -1   -0.10    0.33
 -10  -8   0    0.24    0.32
  10  -8   0    0.32    0.18
 -10  -8   0    0.05    0.17
  10  -8   1    0.50    0.32
 -10  -8   1    0.09    0.31
 -10  -8   1    0.07    0.30
  10  -8   1    0.03    0.20
  10  -8   2    0.02    0.29
 -10  -8   2    0.17    0.33
 -10  -8   2   -0.05    0.29
  10  -8   2    0.37    0.23
  10  -8   3    0.35    0.31
 -10  -8   3    0.57    0.33
 -10  -8   3    0.12    0.29
  10  -8   3    0.34    0.26
  10  -8   4    0.59    0.31
 -10  -8   4    0.26    0.31
  10  -8   4    0.05    0.27
  10  -8   5    0.54    0.34
  10  -8   5    0.63    0.31
  10  -8   6   -0.08    0.31
 -10   8   9   -0.32    0.35
 -10  -8  10    0.07    0.39
 -10   8  10    0.32    0.39
  10   8  10   -0.22    0.37
 -10   8  10   -0.12    0.35
 -10   8  11    0.22    0.43
  10   8  11    0.21    0.39
 -10   8  11   -0.14    0.38
 -10  -8  11    0.12    0.39
 -10   8  12   -0.10    0.38
 -10  -8  12   -0.03    0.40
 -10   8  12   -0.14    0.51
  10   8  12   -0.07    0.41
 -10   8  13   -0.19    0.58
  10   8  13    0.16    0.44
 -10   8  13    0.03    0.40
 -10  -8  13    0.42    0.42
 -10   8  14   -0.34    0.67
  10   8  14    0.17    0.46
 -10   8  14    0.50    0.43
 -10  -8  14    0.08    0.42
  10   8  15    0.16    0.48
  10   8  16    0.02    0.50
  10 -10 -14    0.23    0.56
  10 -10 -13    0.07    0.54
  10 -10 -12    0.34    0.52
  10 -10 -11    0.62    0.53
  10 -10 -10    0.06    0.51
 -10 -10 -10    0.16    0.43
  10 -10  -9    0.47    0.51
 -10 -10  -9   -0.13    0.42
  10 -10  -8    0.49    0.50
 -10 -10  -8    0.41    0.42
  10 -10  -7    0.27    0.49
 -10 -10  -7    1.39    0.44
  10 -10  -6    0.08    0.47
 -10 -10  -6    0.34    0.39
 -10 -10  -5    0.02    0.38
  10 -10  -5    0.42    0.46
  10 -10  -4    0.25    0.47
  10 -10  -3    0.19    0.46
 -10 -10  -2    0.20    0.12
 -10 -10  -1    0.11    0.14
 -10 -10   0    0.17    0.36
 -10 -10   0    0.29    0.20
  10 -10   0    0.36    0.38
 -10 -10   0   -0.08    0.38
  10 -10   1   -0.18    0.37
 -10 -10   1    0.61    0.40
 -10 -10   1   -0.19    0.37
  10 -10   2    0.34    0.37
 -10 -10   2   -0.09    0.37
 -10 -10   2    0.35    0.34
  10 -10   3    0.42    0.37
 -10 -10   3    0.46    0.38
 -10 -10   3    0.44    0.36
  10 -10   3   -0.05    0.27
  10 -10   4    0.02    0.38
 -10 -10   4   -0.20    0.36
  10 -10   4    0.01    0.29
  10 -10   5   -0.08    0.40
 -10 -10   5    0.29    0.37
  10 -10   5   -0.24    0.31
  10 -10   6   -0.48    0.41
 -10 -10   9   -0.17    0.33
 -10  10   9    0.91    0.37
 -10  10  10    0.22    0.36
 -10 -10  10    0.23    0.32
 -10  10  11    0.50    0.39
 -10 -10  11   -0.28    0.34
 -10  10  12   -0.16    0.51
 -10  10  12   -0.07    0.40
 -10 -10  12   -0.02    0.34
 -10  10  13   -0.24    0.41
 -10 -10  13    0.08    0.35
 -10  10  13    0.11    0.58
  10  10  13    0.42    0.45
  10  10  14    0.11    0.47
  10 -12 -11   -0.05    0.60
  10 -12 -10    0.18    0.59
  10 -12  -9    0.80    0.59
  10 -12  -8    0.60    0.57
  10 -12  -7   -0.07    0.56
 -10 -12  -7    1.22    0.47
 -10 -12  -6    0.16    0.44
  10 -12  -6    0.10    0.54
 -10 -12  -5    0.70    0.46
  10 -12  -5   -0.23    0.56
 -10 -12  -4    0.08    0.12
 -10 -12  -4    0.18    0.44
  10 -12  -4   -0.57    0.55
 -10 -12  -3   -0.03    0.42
  10 -12  -3    0.78    0.56
 -10 -12   2    0.84    0.42
 -10 -12   3   -0.43    0.41
 -10 -12   7    0.21    0.23
 -10  12   7   -0.18    0.34
 -10  12   8   -0.17    0.34
 -10 -12   8   -0.10    0.23
 -10  12   9    0.10    0.35
 -10  12  10   -0.10    0.36
 -10  12  11   -0.12    0.37
 -10  12  12   -0.26    0.39
  10 -14  -5    0.17    0.64
  10 -14  -4    0.03    0.64
  10 -14  -3   -0.14    0.63
 -11   1 -14    0.36    0.44
 -11   1 -13    0.32    0.42
 -11  -1 -13   -0.03    0.43
 -11   1 -12    0.38    0.41
  11  -1 -12    0.40    0.24
 -11  -1 -12    0.27    0.39
 -11   1 -11   -0.02    0.39
  11  -1 -11    0.46    0.23
 -11  -1 -11   -0.43    0.38
  11  -1 -10    0.11    0.21
 -11  -1 -10    0.39    0.38
 -11   1 -10    0.73    0.40
  11  -1  -9    0.17    0.20
 -11  -1  -9    0.02    0.37
 -11   1  -9   -0.02    0.36
 -11  -1  -8    0.95    0.38
 -11   1  -8    0.71    0.37
 -11  -1  -7   -0.16    0.33
 -11   1  -7    0.41    0.33
 -11  -1  -6    0.21    0.32
 -11   1  -6    0.22    0.32
 -11   1  -5   -0.01    0.27
 -11  -1  -5   -0.20    0.32
 -11   1  -5    0.15    0.29
 -11   1  -4    0.29    0.26
 -11  -1  -4    0.24    0.32
 -11   1  -4    0.53    0.31
 -11   1  -3    0.39    0.25
 -11  -1  -3   -0.06    0.20
 -11  -1  -3   -0.11    0.31
 -11   1  -3    0.56    0.30
 -11   1  -2    1.68    0.27
 -11  -1  -2    0.89    0.22
 -11  -1  -2    1.46    0.35
 -11   1  -2    1.23    0.33
 -11   1  -1    0.45    0.28
 -11  -1  -1    0.61    0.22
 -11  -1  -1    0.66    0.32
 -11   1  -1   -0.21    0.31
 -11  -1   0    0.25    0.30
 -11   1   0    0.22    0.31
 -11  -1   1    0.37    0.30
 -11   1   1    0.43    0.29
 -11  -1   2    0.90    0.31
 -11   1   2    0.90    0.28
  11  -1   3    0.13    0.25
 -11  -1   3    0.20    0.26
 -11   1   3    0.03    0.25
  11  -1   4    0.35    0.26
 -11  -1   4    0.26    0.25
 -11   1   4    0.47    0.25
  11   1   5    0.09    0.26
  11  -1   5   -0.19    0.26
 -11  -1   5   -0.05    0.24
 -11   1   5    0.48    0.24
 -11   1   6    0.10    0.17
  11   1   6    0.00    0.17
  11  -1   6   -0.01    0.27
 -11  -1   6    0.33    0.23
 -11   1   6    0.29    0.23
  11  -1   6    0.37    0.17
 -11   1   7    0.29    0.21
  11   1   7    0.31    0.22
 -11  -1   7    0.08    0.22
 -11   1   7    0.34    0.24
 -11   1   8    1.00    0.29
  11   1   8    1.10    0.28
 -11  -1   8    0.62    0.21
 -11   1   8    0.85    0.27
 -11  -1   9    0.52    0.19
 -11   1   9    0.20    0.26
 -11   1   9    0.72    0.34
  11   1   9    0.33    0.28
 -11  -1  10    0.19    0.15
 -11   1  10    0.63    0.27
 -11  -1  11    0.26    0.14
 -11   1  11    0.19    0.26
 -11   1  12    0.85    0.28
 -11  -1  12    0.11    0.40
 -11  -1  13   -0.23    0.41
 -11  -1  14    0.03    0.42
  11  -3 -13    0.02    0.30
  11  -3 -12   -0.10    0.29
  11  -3 -11    0.25    0.28
 -11  -3 -11   -0.15    0.38
 -11   3 -10    0.28    0.38
  11  -3 -10    0.18    0.28
 -11  -3 -10    0.26    0.36
 -11   3  -9    0.37    0.36
  11  -3  -9    0.18    0.28
 -11  -3  -9    0.36    0.37
 -11   3  -8    0.58    0.36
  11  -3  -8    0.20    0.29
 -11   3  -8    0.62    0.49
 -11  -3  -8    0.72    0.39
 -11   3  -7    0.37    0.34
  11  -3  -7   -0.05    0.27
 -11   3  -7    0.58    0.42
 -11  -3  -7   -0.19    0.36
 -11   3  -6    0.13    0.32
 -11   3  -6    0.18    0.36
 -11  -3  -6    0.19    0.33
 -11   3  -5    0.56    0.32
 -11  -3  -5    0.56    0.33
 -11   3  -5    0.60    0.33
 -11   3  -4    0.13    0.29
 -11  -3  -4    0.20    0.33
 -11   3  -4    0.24    0.30
 -11   3  -3    0.85    0.28
 -11  -3  -3    0.24    0.32
 -11   3  -3    0.13    0.28
 -11   3  -2    0.53    0.28
 -11  -3  -2    0.69    0.33
 -11   3  -2    0.23    0.27
 -11   3  -1    0.37    0.30
 -11  -3  -1    0.62    0.16
 -11  -3  -1    0.26    0.30
 -11   3  -1    0.33    0.27
 -11  -3   0    0.50    0.29
 -11   3   0    0.67    0.27
  11  -3   1    0.53    0.24
 -11  -3   1    0.49    0.28
 -11   3   1    0.17    0.24
  11  -3   2    0.83    0.26
 -11  -3   2    0.42    0.28
 -11   3   2    0.44    0.24
  11  -3   3    0.26    0.26
 -11  -3   3   -0.06    0.25
 -11   3   3    0.39    0.22
  11  -3   4    0.53    0.27
 -11  -3   4    0.60    0.25
 -11   3   4    0.14    0.19
  11  -3   5    0.26    0.15
 -11  -3   5    0.26    0.22
  11  -3   5    0.27    0.26
 -11   3   5    0.51    0.17
 -11  -3   6   -0.13    0.20
  11  -3   6    0.15    0.28
 -11   3   6    0.11    0.14
 -11   3   7    0.14    0.23
  11   3   7   -0.29    0.25
 -11  -3   7    0.34    0.18
 -11   3   8    0.39    0.26
  11   3   8    0.10    0.27
 -11  -3   8    0.22    0.17
 -11   3   9    0.42    0.29
  11   3   9    0.54    0.30
 -11   3  10    0.64    0.35
  11   3  10    0.44    0.32
 -11   3  11    0.38    0.42
  11   3  11    0.27    0.33
 -11  -3  12   -0.20    0.40
 -11   3  12    0.02    0.52
  11   3  12    1.02    0.38
 -11   3  12    0.41    0.40
 -11   3  13    0.11    0.63
  11   3  13    0.25    0.41
 -11   3  13    0.11    0.38
 -11  -3  13   -0.09    0.43
  11   3  14    0.27    0.42
  11   3  15    0.65    0.44
  11   3  16   -0.72    0.46
  11  -5 -14   -0.14    0.37
  11  -5 -13    0.11    0.35
  11  -5 -12    0.50    0.35
  11  -5 -11    0.49    0.34
  11  -5 -10    0.40    0.33
  11  -5  -9    0.41    0.33
  11  -5  -8    0.05    0.32
 -11  -5  -8   -0.02    0.36
  11  -5  -7    0.17    0.33
 -11  -5  -7    0.41    0.37
 -11   5  -6   -0.02    0.38
  11  -5  -6   -0.12    0.33
 -11  -5  -6    0.44    0.36
 -11   5  -5   -0.01    0.34
 -11  -5  -5    0.14    0.35
 -11   5  -4   -0.12    0.33
 -11  -5  -4    0.80    0.35
 -11   5  -3   -0.02    0.31
 -11  -5  -3   -0.27    0.32
 -11   5  -2    0.11    0.32
 -11  -5  -2    0.52    0.32
 -11  -5  -1    0.44    0.30
 -11  -5   0    0.09    0.29
  11  -5   1    0.18    0.21
 -11  -5   1   -0.46    0.28
  11  -5   2    0.37    0.24
 -11  -5   2    0.18    0.27
  11  -5   3    0.17    0.21
 -11  -5   3    0.31    0.19
 -11  -5   3    0.46    0.25
  11  -5   3   -0.09    0.25
  11  -5   4    0.34    0.21
 -11  -5   4    0.08    0.22
 -11  -5   4    0.10    0.23
  11  -5   4   -0.07    0.26
  11  -5   5    0.19    0.22
 -11  -5   5    0.01    0.22
  11  -5   5   -0.01    0.27
 -11  -5   6    0.24    0.20
  11  -5   6    0.07    0.29
 -11   5   8   -0.09    0.27
  11   5   8   -0.29    0.30
 -11   5   9   -0.06    0.29
  11   5   9   -0.05    0.32
 -11   5  10    0.27    0.33
  11   5  10   -0.10    0.33
 -11   5  11    0.20    0.39
  11   5  11   -0.22    0.35
 -11   5  12    0.52    0.46
  11   5  12    0.13    0.38
 -11  -5  12   -0.06    0.43
 -11   5  12    0.27    0.41
  11   5  13    0.40    0.41
 -11   5  13    0.19    0.42
 -11  -5  13   -0.30    0.44
  11   5  14   -0.02    0.41
  11   5  15    0.67    0.44
  11   5  16    0.38    0.48
  11  -7 -14   -0.14    0.43
  11  -7 -13   -0.10    0.42
  11  -7 -12    0.08    0.41
  11  -7 -11    0.08    0.40
 -11  -7 -11   -0.64    0.45
  11  -7 -10    0.72    0.39
 -11  -7 -10   -0.39    0.43
  11  -7  -9   -0.39    0.39
  11  -7  -8    0.06    0.36
  11  -7  -7    0.31    0.37
 -11  -7  -6    0.25    0.37
  11  -7  -6    0.24    0.39
 -11  -7  -5    0.26    0.37
  11  -7  -5    0.43    0.40
 -11  -7  -4    0.25    0.34
 -11   7  -3    0.16    0.34
 -11  -7  -3    0.10    0.33
 -11  -7  -2   -0.04    0.32
 -11  -7  -1    0.12    0.12
 -11  -7  -1    0.50    0.33
  11  -7   0    0.26    0.19
 -11  -7   0    0.43    0.32
  11  -7   1    0.45    0.22
 -11  -7   1    0.34    0.31
 -11  -7   2    0.48    0.27
 -11  -7   2    0.10    0.29
  11  -7   2    0.33    0.23
  11  -7   2    0.47    0.27
  11  -7   3    0.02    0.27
 -11  -7   3    0.12    0.28
 -11  -7   3   -0.05    0.27
  11  -7   3   -0.26    0.25
  11  -7   4    0.48    0.27
 -11  -7   4   -0.11    0.29
 -11  -7   4    0.31    0.26
  11  -7   4   -0.09    0.27
  11  -7   5   -0.12    0.27
 -11  -7   5    0.15    0.28
 -11  -7   5    0.48    0.27
  11  -7   5    0.68    0.30
  11  -7   6    0.02    0.30
 -11   7  10   -0.37    0.35
  11   7  10   -0.18    0.36
 -11   7  11   -0.12    0.39
  11   7  11   -0.10    0.38
 -11   7  11    0.10    0.38
 -11  -7  11    0.35    0.46
  11   7  12   -0.14    0.39
 -11   7  12   -0.13    0.41
 -11  -7  12    0.58    0.46
 -11   7  13   -0.22    0.41
  11   7  13   -0.31    0.42
 -11  -7  13   -0.30    0.48
  11   7  14    0.29    0.43
  11   7  15    0.10    0.47
  11  -9 -13    0.55    0.51
  11  -9 -12    0.30    0.49
  11  -9 -11    0.47    0.48
  11  -9 -10   -0.21    0.47
  11  -9  -9   -0.12    0.46
 -11  -9  -9    0.11    0.45
  11  -9  -8    0.06    0.44
 -11  -9  -8   -0.05    0.43
  11  -9  -7    0.71    0.45
  11  -9  -6   -0.12    0.44
  11  -9  -5    0.13    0.43
  11  -9  -4    0.08    0.44
 -11  -9  -3    0.09    0.38
 -11  -9  -2    0.04    0.10
 -11  -9  -2    0.71    0.39
 -11  -9  -1   -0.11    0.35
 -11  -9   0   -0.40    0.37
 -11  -9   1    0.08    0.34
  11  -9   2    0.74    0.34
 -11  -9   2   -0.10    0.33
  11  -9   3    0.39    0.33
 -11  -9   3    0.06    0.31
  11  -9   4   -0.05    0.32
 -11  -9   4    0.41    0.33
  11  -9   5   -0.12    0.34
 -11  -9   5    0.28    0.34
  11  -9   5    0.59    0.32
  11  -9   6    0.03    0.35
 -11  -9  10    0.16    0.43
 -11   9  10    0.02    0.40
 -11   9  11    0.39    0.41
 -11  -9  11    0.13    0.43
 -11  -9  12   -0.03    0.42
 -11   9  12    0.10    0.41
  11   9  13    0.35    0.44
  11 -11 -12   -0.83    0.57
  11 -11 -11    0.60    0.57
  11 -11 -10   -0.19    0.55
  11 -11  -9   -0.16    0.54
  11 -11  -8    0.56    0.54
  11 -11  -7   -0.29    0.53
 -11 -11  -6    0.60    0.47
  11 -11  -6    0.48    0.53
  11 -11  -5   -0.13    0.52
  11 -11  -4    0.65    0.52
 -11 -11  -1   -0.10    0.41
 -11 -11   0    0.27    0.41
 -11 -11   1    0.02    0.39
  11 -11   1    0.37    0.38
  11 -11   2    0.14    0.39
 -11 -11   2   -0.23    0.40
 -11 -11   3    0.32    0.40
 -11 -11   4    0.05    0.40
 -11 -11   5    0.19    0.42
 -11  11   8   -0.02    0.37
 -11  11   9    0.22    0.39
 -11 -11   9   -0.09    0.33
 -11  11  10    0.20    0.40
 -11 -11  10   -0.07    0.32
 -11  11  11    0.32    0.41
 -11 -11  11    0.02    0.32
  11 -13  -7   -0.05    0.61
  11 -13  -6    0.26    0.60
  11 -13  -5    0.57    0.59
 -11  13   6    0.02    0.35
 -12   0 -13   -0.25    0.42
 -12   0 -12    0.03    0.41
 -12   0 -11   -0.03    0.40
 -12   0 -10    0.48    0.40
 -12   0  -9    0.02    0.36
 -12   0  -8    0.40    0.37
 -12   0  -7    0.25    0.34
 -12   0  -6    0.37    0.34
 -12   0  -5   -0.10    0.21
 -12   0  -5    0.13    0.31
 -12   0  -4   -0.24    0.20
 -12   0  -4   -0.04    0.31
 -12   0  -3    0.30    0.20
 -12   0  -3    0.03    0.32
 -12   0  -2    1.50    0.24
 -12   0  -2    0.99    0.34
 -12   0  -1    0.24    0.22
 -12   0  -1   -0.38    0.31
 -12   0   0    0.22    0.30
 -12   0   1   -0.30    0.29
 -12   0   2    1.11    0.31
 -12   0   3    0.28    0.28
 -12   0   4    0.18    0.28
 -12   0   5   -0.34    0.27
 -12   0   6    0.66    0.29
 -12   0   7    0.15    0.15
  12   0   7    0.17    0.13
 -12   0   7    0.18    0.29
 -12   0   8    0.35    0.20
  12   0   8    0.07    0.22
 -12   0   8   -0.32    0.31
 -12   0   9   -0.12    0.29
  12   0   9    0.78    0.28
 -12   0  10   -0.39    0.29
 -12   0  11    0.22    0.27
 -12   2 -12    0.03    0.43
 -12  -2 -12   -0.59    0.43
 -12   2 -11    0.18    0.39
 -12  -2 -11    0.10    0.39
 -12   2 -10    0.58    0.40
 -12  -2 -10    0.27    0.40
 -12   2  -9    0.23    0.37
 -12  -2  -9   -0.09    0.36
 -12  -2  -8   -0.38    0.37
 -12   2  -8    0.31    0.36
 -12   2  -7    0.60    0.33
 -12  -2  -7    0.52    0.37
 -12   2  -7    0.35    0.35
 -12   2  -6    0.41    0.28
 -12  -2  -6    0.52    0.37
 -12   2  -6    0.50    0.32
 -12   2  -5   -0.04    0.25
 -12  -2  -5    0.06    0.33
 -12   2  -5   -0.04    0.32
 -12   2  -4    0.18    0.24
 -12  -2  -4   -0.06    0.32
 -12   2  -4    0.24    0.30
 -12   2  -3    0.28    0.25
 -12  -2  -3   -0.11    0.16
 -12  -2  -3    0.20    0.33
 -12   2  -3    0.30    0.29
 -12   2  -2    0.53    0.26
 -12  -2  -2    0.71    0.19
 -12  -2  -2    0.41    0.32
 -12   2  -2    0.53    0.30
 -12  -2  -1    0.48    0.32
 -12   2  -1    0.17    0.28
 -12  -2   0    0.06    0.30
 -12   2   0   -0.05    0.26
 -12  -2   1    0.10    0.29
 -12   2   1   -0.11    0.25
 -12  -2   2    1.05    0.30
 -12   2   2    0.77    0.26
  12  -2   3    0.57    0.27
 -12  -2   3   -0.07    0.27
 -12   2   3    0.31    0.25
  12  -2   4   -0.04    0.26
 -12  -2   4   -0.08    0.26
 -12   2   4   -0.11    0.24
  12  -2   5   -0.09    0.28
 -12  -2   5    0.22    0.25
 -12   2   5   -0.24    0.24
 -12  -2   6    0.20    0.23
 -12   2   6   -0.15    0.22
 -12  -2   7    0.01    0.21
 -12   2   7   -0.18    0.22
  12   2   8   -0.09    0.22
 -12  -2   8    0.13    0.20
 -12   2   8   -0.23    0.20
  12   2   9    0.37    0.26
 -12  -2   9    0.33    0.18
 -12   2   9   -0.19    0.17
  12   2  10    0.44    0.29
 -12  -2  10    0.29    0.16
  12   2  11    0.40    0.32
 -12  -2  11    0.07    0.14
  12   2  12   -0.04    0.34
 -12  -2  12    0.09    0.13
  12   2  13    0.85    0.40
  12  -4 -11    0.32    0.31
 -12  -4 -11    0.31    0.42
  12  -4 -10   -0.09    0.30
 -12  -4 -10   -0.03    0.41
  12  -4  -9    0.07    0.31
 -12  -4  -9   -0.22    0.40
  12  -4  -8    0.08    0.30
 -12  -4  -8   -0.07    0.39
 -12  -4  -7    0.34    0.39
 -12   4  -6    0.10    0.32
 -12   4  -6    0.05    0.31
 -12  -4  -6    0.41    0.37
 -12   4  -5   -0.04    0.32
 -12   4  -5   -0.02    0.29
 -12  -4  -5    0.27    0.34
 -12   4  -4   -0.10    0.30
 -12   4  -4    0.16    0.28
 -12  -4  -4   -0.04    0.34
 -12   4  -3   -0.05    0.30
 -12   4  -3    0.13    0.27
 -12  -4  -3    0.23    0.32
 -12   4  -2    0.01    0.29
 -12   4  -2    0.39    0.28
 -12  -4  -2    0.02    0.14
 -12  -4  -2    0.67    0.34
 -12   4  -1    0.27    0.28
 -12  -4  -1    0.26    0.31
 -12   4   0    0.15    0.26
 -12  -4   0    0.03    0.29
 -12   4   1    0.05    0.24
 -12  -4   1    0.02    0.28
 -12   4   2    0.16    0.21
  12  -4   2    0.30    0.24
 -12  -4   2    0.13    0.26
  12  -4   3    0.35    0.26
 -12  -4   3   -0.13    0.25
  12  -4   4    0.22    0.27
 -12  -4   4   -0.16    0.24
  12  -4   5    0.20    0.11
 -12  -4   5    0.28    0.23
  12  -4   5    0.29    0.28
  12  -4   6    0.20    0.17
 -12  -4   6    0.22    0.21
 -12  -4   7    0.24    0.19
 -12  -4   8    0.04    0.16
  12   4   9   -0.21    0.29
 -12  -4   9    0.22    0.16
  12   4  10   -0.01    0.30
 -12  -4  10    0.11    0.14
  12   4  11    0.22    0.33
  12   4  12   -0.01    0.36
 -12   4  12    0.31    0.41
 -12  -4  12    0.80    0.47
  12  -6 -11   -0.27    0.38
  12  -6 -10    0.01    0.35
  12  -6  -9   -0.01    0.36
 -12  -6  -9   -0.13    0.43
  12  -6  -8   -0.19    0.36
 -12  -6  -8    0.05    0.39
 -12  -6  -7   -0.22    0.39
  12  -6  -7    0.11    0.35
 -12  -6  -6   -0.19    0.37
 -12  -6  -5    0.54    0.37
 -12   6  -4    0.13    0.31
 -12  -6  -4    0.75    0.37
 -12   6  -3    0.16    0.31
 -12  -6  -3    0.39    0.35
 -12  -6  -2    0.96    0.35
 -12  -6  -1    0.05    0.30
 -12  -6   0   -0.36    0.32
  12  -6   1    0.17    0.22
 -12  -6   1    0.16    0.29
  12  -6   2    0.25    0.23
 -12  -6   2    0.16    0.28
 -12  -6   3   -0.01    0.26
  12  -6   3    0.27    0.26
  12  -6   4    0.35    0.22
 -12  -6   4    0.31    0.25
  12  -6   4    0.50    0.28
  12  -6   5    0.12    0.22
 -12  -6   5    0.04    0.23
  12  -6   5    0.38    0.29
  12  -6   6   -0.08    0.23
 -12  -6   6    0.16    0.21
 -12  -6   7    0.34    0.21
 -12  -6   8    0.17    0.19
  12   6  11   -0.01    0.35
  12  -8 -11    0.02    0.44
  12  -8 -10   -0.29    0.42
  12  -8  -9    0.57    0.42
  12  -8  -8    0.54    0.43
 -12  -8  -7   -0.05    0.44
  12  -8  -7   -0.17    0.43
 -12  -8  -6    0.56    0.42
  12  -8  -6   -0.03    0.41
 -12  -8  -5    1.01    0.42
 -12  -8  -4    0.42    0.38
 -12  -8  -3    0.02    0.37
 -12  -8  -2   -0.19    0.37
 -12  -8  -1    0.64    0.37
 -12  -8   0    0.25    0.32
 -12  -8   1    0.11    0.32
 -12  -8   2    0.04    0.31
 -12  -8   3    0.33    0.30
  12  -8   3    0.28    0.28
  12  -8   4   -0.23    0.27
 -12  -8   4    0.18    0.29
 -12  -8   5    0.57    0.29
 -12  -8   6    0.37    0.28
 -12  -8   7    0.27    0.28
 -12  -8  11   -0.03    0.49
 -12   8  11    0.24    0.43
  12 -10 -11   -0.43    0.50
  12 -10 -10    0.61    0.50
  12 -10  -9    0.06    0.49
  12 -10  -8   -0.39    0.51
  12 -10  -7    0.10    0.49
  12 -10  -6    0.28    0.48
 -12 -10  -4    0.57    0.46
 -12 -10  -3    0.15    0.43
 -12 -10  -2    0.56    0.43
 -12 -10  -1    0.52    0.41
 -12 -10   0    0.09    0.39
 -12 -10   1    0.29    0.40
 -12 -10   2    0.52    0.40
 -12 -10   3    0.55    0.39
 -12 -10   4    0.10    0.38
 -12 -10   5    0.32    0.36
 -12 -10   6    0.54    0.39
 -12 -10   7    0.45    0.41
 -12  10   9    0.05    0.42
 -12  10  10   -0.37    0.41
 -12 -10  10    0.16    0.43
  12 -12  -8    0.02    0.56
  12 -12  -7   -0.05    0.56
  12 -12  -6    0.61    0.55
 -12  12   8    0.11    0.39
 -12  12   9    0.06    0.40
 -13   1 -11   -0.03    0.42
 -13  -1 -11   -0.16    0.44
 -13   1 -10    0.10    0.42
 -13  -1 -10    0.16    0.41
 -13  -1  -9   -0.20    0.39
 -13   1  -9   -0.24    0.38
 -13  -1  -8    0.07    0.37
 -13   1  -8    0.30    0.37
 -13  -1  -7    0.20    0.35
 -13   1  -7    0.11    0.35
 -13   1  -6   -0.19    0.21
 -13  -1  -6    0.61    0.36
 -13   1  -6    0.32    0.35
 -13   1  -5    0.26    0.20
 -13  -1  -5    0.40    0.34
 -13   1  -5    0.30    0.34
 -13   1  -4    0.19    0.20
 -13  -1  -4   -0.22    0.35
 -13   1  -4    0.30    0.32
 -13   1  -3    0.15    0.22
 -13  -1  -3    0.19    0.34
 -13   1  -3    0.02    0.31
 -13   1  -2    0.46    0.24
 -13  -1  -2    0.02    0.32
 -13   1  -2    0.26    0.31
 -13  -1  -1    0.05    0.32
 -13   1  -1    0.02    0.31
 -13  -1   0    0.51    0.32
 -13   1   0    0.38    0.31
 -13  -1   1    0.40    0.32
 -13   1   1   -0.08    0.30
 -13  -1   2    0.40    0.31
 -13   1   2    0.31    0.31
 -13  -1   3   -0.25    0.30
 -13   1   3    0.32    0.30
 -13  -1   4    0.57    0.32
 -13   1   4   -0.30    0.29
 -13  -1   5    0.21    0.29
 -13   1   5    0.43    0.29
 -13  -1   6    0.47    0.30
 -13   1   6   -0.01    0.30
 -13  -1   7    0.12    0.30
 -13   1   7   -0.14    0.30
 -13  -1   8    0.21    0.29
 -13   1   8   -0.16    0.32
 -13  -1   9   -0.12    0.29
 -13  -1  10    0.01    0.27
 -13  -3 -10    0.26    0.41
 -13   3  -9    0.12    0.38
 -13  -3  -9    0.41    0.40
 -13   3  -8    0.09    0.37
 -13  -3  -8   -0.29    0.39
 -13   3  -7    0.26    0.38
 -13  -3  -7    0.02    0.39
 -13   3  -6    0.04    0.34
 -13   3  -6    0.34    0.26
 -13  -3  -6   -0.34    0.38
 -13   3  -5   -0.02    0.34
 -13   3  -5    0.29    0.24
 -13  -3  -5   -0.02    0.36
 -13   3  -4    0.11    0.23
 -13  -3  -4    0.08    0.34
 -13   3  -4    0.09    0.32
 -13   3  -3   -0.11    0.24
 -13  -3  -3   -0.12    0.34
 -13   3  -3    0.26    0.32
 -13   3  -2    0.61    0.27
 -13  -3  -2    0.36    0.33
 -13   3  -2    0.03    0.31
 -13  -3  -1    0.25    0.32
 -13   3  -1   -0.15    0.28
 -13  -3   0    0.62    0.33
 -13   3   0   -0.33    0.28
 -13  -3   1    0.28    0.31
 -13   3   1    0.13    0.27
 -13  -3   2   -0.02    0.28
 -13   3   2    0.30    0.26
  13  -3   3    0.05    0.27
 -13  -3   3   -0.01    0.28
 -13   3   3   -0.07    0.24
  13  -3   4    0.29    0.27
 -13  -3   4   -0.27    0.27
 -13   3   4    0.21    0.21
 -13  -3   5    0.23    0.26
 -13   3   5   -0.11    0.19
 -13  -3   6   -0.07    0.23
 -13   3   6    0.03    0.15
 -13  -3   7    0.26    0.22
 -13  -3   8   -0.12    0.20
 -13  -3   9    0.09    0.18
 -13  -3  10    0.04    0.17
 -13  -3  11    0.05    0.15
 -13  -5  -9    0.56    0.46
 -13  -5  -8   -0.29    0.44
 -13  -5  -7   -0.02    0.41
 -13  -5  -6    0.07    0.37
 -13  -5  -5   -0.11    0.38
 -13   5  -4    0.47    0.28
 -13  -5  -4    0.37    0.37
 -13   5  -3    0.07    0.28
 -13  -5  -3    0.42    0.35
 -13  -5  -2    0.64    0.35
 -13  -5  -1    0.17    0.32
 -13  -5   0    0.47    0.32
 -13  -5   1    0.20    0.29
 -13  -5   2    0.46    0.29
 -13  -5   3    0.39    0.27
  13  -5   4    0.06    0.28
 -13  -5   4   -0.13    0.25
 -13  -5   5    0.69    0.25
 -13  -5   6    0.03    0.21
 -13  -5   7    0.42    0.21
 -13  -5   8    0.24    0.19
 -13  -5   9   -0.20    0.17
 -13  -5  10    0.01    0.15
 -13  -5  11   -0.05    0.14
 -13  -5  12   -0.02    0.14
 -13  -7  -7    1.06    0.46
 -13  -7  -6    0.43    0.42
 -13  -7  -5    0.12    0.41
 -13  -7  -4    0.74    0.41
 -13  -7  -3    0.31    0.37
 -13  -7  -2    0.57    0.37
 -13  -7  -1    0.10    0.35
 -13  -7   0   -0.23    0.33
 -13  -7   1   -0.11    0.32
 -13  -7   2    0.36    0.31
 -13  -7   3    0.47    0.29
 -13  -7   4    0.13    0.27
 -13  -7   5    0.18    0.25
 -13  -7   6   -0.03    0.24
 -13  -7   7    0.15    0.23
 -13  -7   8   -0.01    0.22
 -13  -7   9    0.15    0.20
 -13  -7  10   -0.10    0.20
  13  -9  -8   -0.27    0.46
 -13  -9  -4    0.13    0.43
 -13  -9  -3    0.78    0.43
 -13  -9  -2    0.49    0.44
 -13  -9  -1    0.52    0.41
 -13  -9   0    0.63    0.39
 -13  -9   1    0.12    0.37
 -13  -9   2   -0.12    0.35
 -13  -9   3   -0.02    0.34
 -13  -9   4    0.07    0.34
 -13  -9   5    0.40    0.33
 -13  -9   6    0.65    0.32
 -13  -9   7    0.53    0.32
 -13  -9   8   -0.36    0.31
 -13  -9   9    0.37    0.32
  13 -11  -8   -0.17    0.50
 -14   0 -10    0.51    0.45
 -14   0  -9   -0.05    0.40
 -14   0  -8    0.12    0.41
 -14   0  -7    0.50    0.40
 -14   0  -6   -0.20    0.37
 -14   0  -5    0.61    0.38
 -14   0  -4    0.29    0.37
 -14   0  -3    0.65    0.35
 -14   0  -2    0.38    0.36
 -14   0  -1    0.12    0.36
 -14   0   0    0.11    0.35
 -14   0   1    0.19    0.36
 -14   0   2   -0.18    0.36
 -14   0   3    0.25    0.36
 -14   0   4    0.09    0.36
 -14   0   5    0.04    0.37
 -14   0   6   -0.42    0.39
 -14   0   7   -0.18    0.43
 -14   2 -10    0.08    0.44
 -14   2  -9    0.26    0.43
 -14  -2  -9    0.47    0.44
 -14   2  -8    0.07    0.41
 -14  -2  -8   -0.10    0.40
 -14   2  -7   -0.09    0.40
 -14  -2  -7    0.15    0.41
 -14  -2  -6    1.09    0.41
 -14   2  -6    0.11    0.37
 -14  -2  -5    0.11    0.39
 -14   2  -5    0.13    0.37
 -14  -2  -4    0.46    0.39
 -14   2  -4    0.04    0.36
 -14  -2  -3   -0.30    0.38
 -14   2  -3    0.02    0.34
 -14  -2  -2    0.77    0.38
 -14   2  -2    0.47    0.35
 -14  -2  -1   -0.02    0.36
 -14   2  -1    0.65    0.35
 -14  -2   0    0.02    0.35
 -14   2   0    0.05    0.34
 -14  -2   1    0.30    0.35
 -14   2   1    0.29    0.33
 -14  -2   2    0.23    0.34
 -14   2   2    0.18    0.32
 -14  -2   3    0.49    0.35
 -14   2   3    0.27    0.31
 -14  -2   4   -0.08    0.32
 -14   2   4    0.14    0.30
 -14  -2   5    0.60    0.33
 -14   2   5    0.31    0.29
 -14  -2   6    0.55    0.33
 -14  -2   7    0.28    0.30
 -14  -2   8   -0.06    0.28
 -14  -2   9    0.14    0.27
 -14  -4  -8   -0.13    0.46
 -14  -4  -7   -0.41    0.44
 -14  -4  -6   -0.60    0.43
 -14  -4  -5   -0.23    0.41
 -14   4  -4   -0.04    0.36
 -14  -4  -4    0.53    0.39
 -14   4  -3   -0.06    0.36
 -14  -4  -3   -0.19    0.37
 -14   4  -2    0.28    0.35
 -14  -4  -2    0.31    0.36
 -14   4  -1    0.03    0.32
 -14  -4  -1    0.39    0.36
 -14   4   0    0.58    0.32
 -14  -4   0    0.55    0.35
 -14  -4   1    0.11    0.33
 -14  -4   2    0.31    0.31
 -14  -4   3    0.26    0.30
 -14  -4   4    0.03    0.27
 -14  -4   5    0.12    0.25
 -14  -4   6    0.13    0.24
 -14  -4   7    0.07    0.21
 -14  -4   8    0.17    0.21
 -14  -4   9   -0.07    0.19
 -14  -4  10   -0.08    0.17
 -14  -6  -6   -0.18    0.43
 -14  -6  -5   -0.49    0.43
 -14  -6  -4    0.45    0.41
 -14  -6  -3    0.34    0.41
 -14  -6  -2    0.86    0.40
 -14  -6  -1    0.02    0.35
 -14  -6   0    0.22    0.33
 -14  -6   1   -0.02    0.32
 -14  -6   2    0.26    0.31
 -14  -6   3    0.26    0.29
 -14  -6   4    0.44    0.27
 -14  -6   5    0.10    0.25
 -14  -6   6    0.13    0.23
 -14  -6   7   -0.01    0.22
 -14  -6   8   -0.12    0.20
 -14  -6   9    0.07    0.18
 -14  -6  10    0.08    0.17
 -14  -8  -3    0.60    0.44
 -14  -8  -2    0.25    0.41
 -14  -8  -1    0.81    0.41
 -14  -8   0    0.16    0.37
 -14  -8   1    0.04    0.35
 -14  -8   2    0.32    0.34
 -14  -8   3    0.26    0.31
 -14  -8   4   -0.02    0.30
 -14  -8   5    0.13    0.28
 -14  -8   6    0.01    0.27
 -14  -8   7   -0.01    0.25
 -14  -8   8   -0.04    0.24
 -14  -8   9    0.07    0.24
 -15  -1  -8    0.05    0.44
 -15   1  -8   -0.16    0.45
 -15  -1  -7   -0.15    0.42
 -15   1  -7   -0.05    0.43
 -15  -1  -6    0.17    0.42
 -15   1  -6   -0.02    0.42
 -15  -1  -5   -0.12    0.41
 -15   1  -5    0.16    0.42
 -15  -1  -4    0.63    0.42
 -15   1  -4    0.39    0.42
 -15  -1  -3   -0.02    0.40
 -15   1  -3    0.42    0.42
 -15  -1  -2    0.78    0.44
 -15   1  -2    0.13    0.41
 -15  -1  -1    0.09    0.42
 -15   1  -1    0.04    0.39
 -15  -1   0    0.35    0.42
 -15   1   0    0.30    0.40
 -15  -1   1    0.19    0.42
 -15   1   1    0.26    0.41
 -15  -1   2    0.50    0.44
 -15   1   2    0.41    0.40
 -15  -1   3    0.06    0.44
 -15   1   3    0.09    0.41
 -15  -1   4   -0.25    0.44
 -15   1   4    0.35    0.42
 -15  -1   5    0.35    0.45
 -15  -1   6   -0.04    0.46
 -15   3  -8    0.03    0.46
 -15   3  -7   -0.17    0.45
 -15  -3  -7    0.29    0.44
 -15   3  -6   -0.60    0.45
 -15  -3  -6   -0.10    0.45
 -15   3  -5    0.51    0.46
 -15  -3  -5    0.10    0.44
 -15   3  -4    0.11    0.41
 -15  -3  -4    0.07    0.44
 -15   3  -3   -0.13    0.41
 -15  -3  -3   -0.37    0.43
 -15   3  -2    0.26    0.41
 -15  -3  -2    0.59    0.42
 -15  -3  -1    0.19    0.40
 -15   3  -1   -0.06    0.40
 -15  -3   0    0.16    0.40
 -15   3   0   -0.27    0.38
 -15  -3   1    0.22    0.39
 -15   3   1   -0.15    0.37
 -15  -3   2    0.30    0.36
 -15   3   2   -0.01    0.35
 -15  -3   3   -0.02    0.36
 -15  -3   4    0.05    0.34
 -15  -3   5    0.36    0.33
 -15  -3   6    0.38    0.31
 -15  -3   7    0.30    0.29
 -15  -5  -5   -0.07    0.45
 -15  -5  -4    0.07    0.44
 -15  -5  -3    0.18    0.41
 -15  -5  -2    0.22    0.39
 -15  -5  -1   -0.12    0.38
 -15  -5   0    0.14    0.36
 -15  -5   1    0.53    0.35
 -15  -5   2    0.12    0.32
 -15  -5   3    0.51    0.31
 -15  -5   4    0.35    0.29
 -15  -5   5    0.19    0.28
 -15  -5   6   -0.16    0.25
 -15  -5   7    0.06    0.22
 -15  -5   8   -0.01    0.21
 -15  -7  -1   -0.10    0.38
 -15  -7   0    0.14    0.36
 -15  -7   1    0.23    0.34
 -15  -7   2    0.45    0.33
 -15  -7   3    0.12    0.30
 -15  -7   4   -0.10    0.28
 -15  -7   5   -0.08    0.26
 -15  -7   6    0.12    0.23
 -15  -7   7    0.07    0.22
 -15  -7   8    0.04    0.21
 -16   0  -6    0.11    0.47
 -16   0  -5    0.34    0.47
 -16   0  -4    0.28    0.47
 -16   0  -3    0.17    0.46
 -16   0  -2    0.17    0.47
 -16   0  -1   -0.15    0.47
 -16   0   0    0.15    0.47
 -16   0   1    0.58    0.49
 -16   0   2    0.17    0.51
 -16   2  -7    0.84    0.53
 -16   2  -6   -0.18    0.48
 -16   2  -5   -0.16    0.49
 -16  -2  -5    0.10    0.46
 -16  -2  -4   -0.30    0.46
 -16   2  -4   -0.32    0.46
 -16  -2  -3   -0.32    0.47
 -16   2  -3    0.19    0.48
 -16  -2  -2   -0.73    0.50
 -16   2  -2   -0.28    0.47
 -16  -2  -1   -0.26    0.48
 -16   2  -1    0.07    0.46
 -16  -2   0    0.28    0.47
 -16   2   0    0.22    0.46
 -16  -2   1   -0.09    0.45
 -16  -2   2    0.04    0.46
 -16  -2   3   -0.09    0.46
 -16  -2   4    0.04    0.46
 -16  -4  -3   -0.50    0.47
 -16  -4  -2    0.09    0.44
 -16  -4  -1    0.02    0.41
 -16  -4   0   -0.02    0.40
 -16  -4   1    0.02    0.39
 -16  -4   2    0.92    0.40
 -16  -4   3   -0.11    0.36
 -16  -4   4    0.29    0.34
 -16  -4   5    0.30    0.31
 -16  -6   1    0.28    0.36
 -16  -6   2   -0.07    0.32
 -16  -6   3    0.40    0.30
 -16  -6   4    0.21    0.28
 -16  -6   5    0.24    0.26
 -16  -6   6   -0.13    0.25
 -17   1  -5   -0.17    0.52
 -17   1  -4    0.50    0.55
 -17  -1  -3    0.49    0.51
 -17   1  -3    0.17    0.54
 -17  -1  -2   -0.05    0.51
 -17  -1  -1    0.30    0.53
 -17  -1   0    0.95    0.56
 -17  -3  -1   -0.52    0.51
 -17  -3   0   -0.26    0.47
 -17  -3   1   -0.55    0.48
   0   0   0    0.00    0.00
;
_shelx_hkl_checksum   87511
