# Supplementary material
Source: MDPI journal article supplement (https://www.mdpi.com/2073-4352/9/4/184)
Supplement: s1 [file s1 › Supporting Information .docx]

Supporting Information

Transition Induces Distinct Dielectric and Nonlinear Optical Switching Response Behavior in Crown-Ether-Based Supramolecular Clathrate

Jing Jing 1, Fan Jiang 1, Yan-Li Wei 1, Chao Shi 2, Heng-Yun Ye 2 and Yi Zhang 1,2*

1 Ordered Matter Science Research Center, Jiangsu Key Laboratory for Science and Applications of Molecular Ferroelectrics, Southeast University, Nanjing 211189, China; 220162415@seu.edu.cn (J.J.); 220172879@seu.edu.cn (F.J.); 220162392@seu.edu.cn (Y-L.W.)

2 Chaotic Matter Science Research Center, Jiangxi University of Science and Technology, Ganzhou 341000, China; shic@jxust.edu.cn (C.S.); yehy@jxust.edu.cn (H-Y.Y.)

***** Correspondence: yizhang1980@seu.edu.cn (Y.Z.)


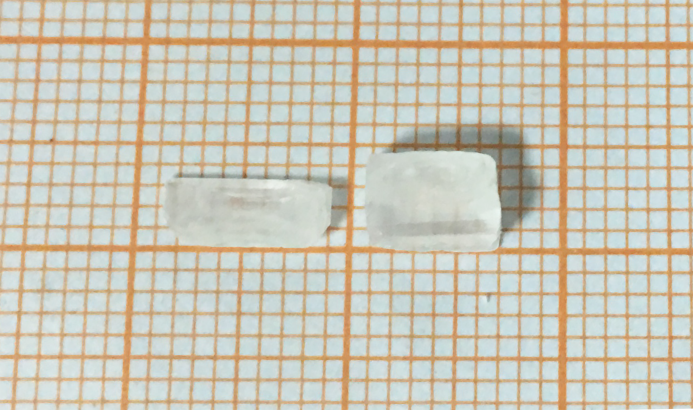


**Figure S1.** Crystal morphology of **1**.


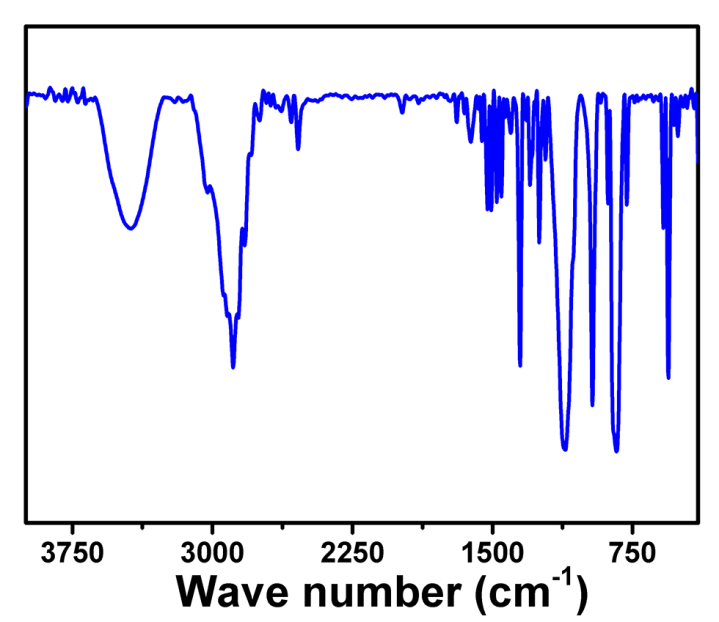


**Figure S2.** IR spectra of **1**.


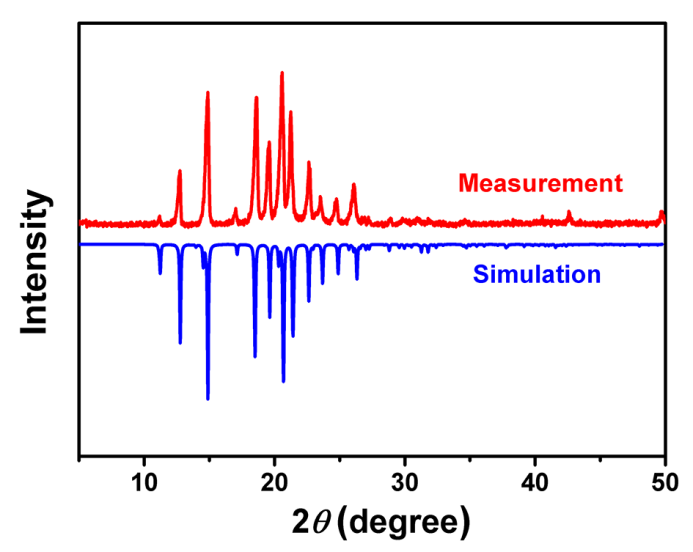


**Figure S3.** PXRD patterns of **1** measured at room temperature.


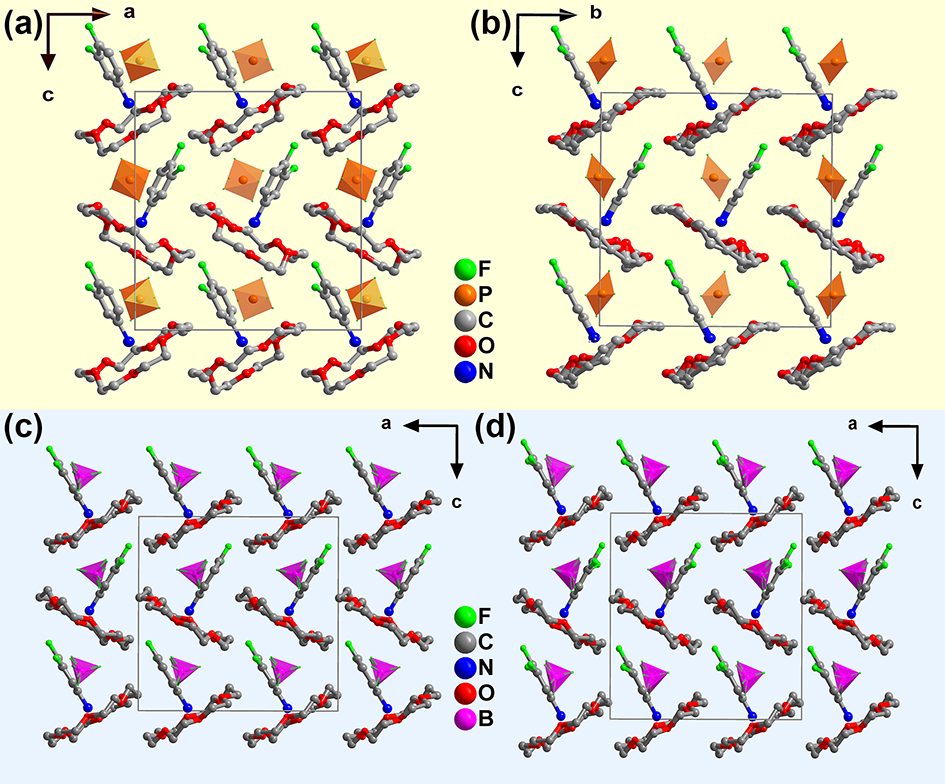


**Figure S4.** The packing diagrams of **1** at (a) 293 K and (b) 323 K. Hydrogen atoms in were omitted for clarity.


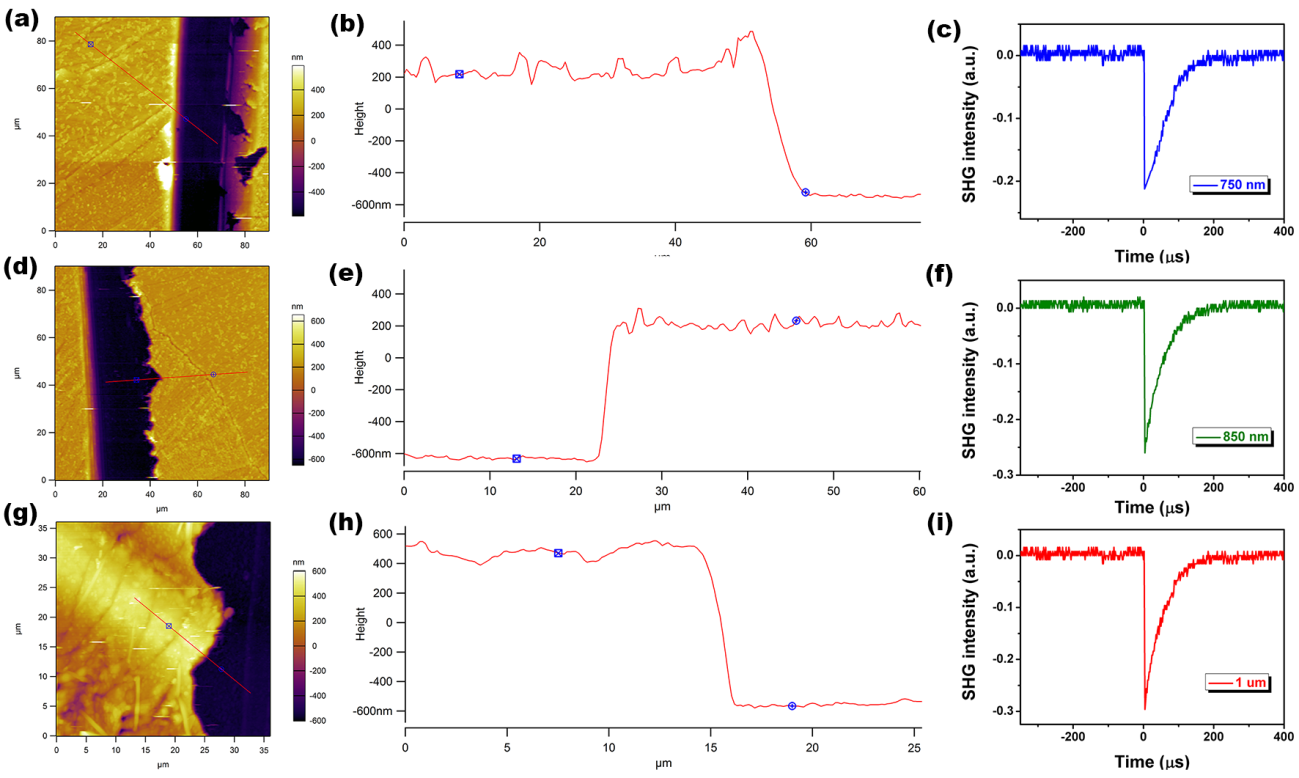


**Figure S5.** (a, d, g)：Topography for the thin films with 1 um, 850 nm and 750 nm thickness. (b, e, h)：The cross-sectional plot along the red line in (a, d, g). (c, f, i): Oscilloscope trace of the SHG of thin films with 1 um, 850 nm and 750 nm thickness.

**Table S1.** Crystallographic Data for compound **1**.

| Compound | **1** (293 K) | **1** (323 K) |
| --- | --- | --- |
| Molecular formula | C18H30PF8NO6 | C18H30PF8NO6 |
| Formula weight | 539.40 | 539.40 |
| Crystal system | orthorhombic | orthorhombic |
| Space group | *Pna*21 | *Cmc*21 |
| *a* / Å | 13.425(3) | 11.9791(10) |
| *b* / Å | 11.817(2) | 13.6041(12) |
| *c* / Å | 15.660(3) | 15.4202(8) |
| *V* / Å3 | 2484.4(9) | 2513.0(3) |
| *Z* | 4 | 4 |
| *D*calc / g·cm−3 | 1.442 | 1.423 |
| *μ* / mm−1 | 0.203 | 0.201 |
| *F*(000) | 1120 | 1116 |
| *θ* range / ° | 3.035–27.467 | 2.622–31.569 |
| Reflns collected | 15251 | 8228 |
| Independent reflns (*R*int) | 5528 (0.065) | 3219 (0.021) |
| No. of parameters | 309 | 244 |
| *R*1[a], *wR*2[b]  [*I* > 2*σ*(*I*)] | 0.1370/0.2590 | 0.1896/0.4522 |
| *R*1, *wR*2 [all data] | 0.2212/0.2955 | 0.2634/0.4942 |
| GOF | 1.298 | 1.536 |
| Δ*ρ*[c] / e·Å−3 | 0.38, −0.23 | 0.78, −0.46 |

[a] *R*1 = Σ| |*F*o| − |*F*c| | / |*F*o|. [b] w*R*2 = [Σ*w*(*F*o2−*F*c2)2] / Σ*w*(*F*o2)2]1/2. [c] Maximum and minimum residual electron density.

**Table S2.** Hydrogen bonds (Å, °) for **1**.

| D−H···A | H···A | D···A | D−H···A |
| --- | --- | --- | --- |
| **1 (293** K**)** |  |  |  |
| N1−H1C···O2 | 1.96 | 2.850(12) | 178 |
| N1−H1B···O6 | 1.96 | 2.841(11) | 172 |
| N1−H1B···O1 | 2.50 | 2.949(11) | 112 |
| N1−H1A···O4 | 2.02 | 2.912(11) | 179 |
| **1 (323** K**)** |  |  |  |
| N1−H1C···O3 | 1.97 | 2.76(4) | 146 |
| N1−H1C···O2 | 2.22 | 3.04(4) | 154 |
| N1−H1C···O2 | 2.36 | 3.04(4) | 133 |
| N1−H1C···O1 | 2.39 | 3.04(4) | 130 |
| N1−H1B···O6 | 2.05 | 2.87(4) | 152 |
| N1−H1B···O5 | 2.21 | 2.80(3) | 124 |
| N1−H1B···O5 | 2.07 | 2.80(3) | 139 |
| N1−H1B···O4 | 2.28 | 2.99(4) | 137 |
| N1−H1A···O6 | 2.19 | 2.87(4) | 132 |
| N1−H1A···O4 | 2.20 | 2.99(4) | 148 |
| N1−H1A···O3 | 2.11 | 2.76(4) | 129 |
| N1−H1A···O1 | 2.25 | 3.04(4) | 149 |

**Table S3.** Calculation of the polarization of **1 (293** K**)** with a point charge model.

| Atoms | Atom coordinate | | Coordinate of charge center |
| --- | --- | --- | --- |
| N | N1 (0.47241, 0.98712, 0.05020) | N2 (0.52759, 0.01288, 0.55020) | (0.5, 0.5, 0.3002) |
| N3 (0.02759, 0.48712, 0.55020) | N4 (0.97241, 0.51288, 0.05020) |
| P | P1 (0.02191, 0.96698, 0.87180) | P2 (0.47809, 0.46698, 0.37180) | (0.5, 0.5, 0.6218) |
| P3 (0.97809, 0.03302, 0.37180) | P4 (0.52191, 0.53302, 0.87180) |

*P*s = (*q*P*r*P + *q*N*r*N) / V

*P*s = [(-e × 0.6218) + (e × 0.3002)] × 4× *c* / V

*P*s = −0.129 C/m2

*|P*s*|* = 0.129 C/m2 = 12.9 *μ*C/cm2

**Table S4.** Calculation of the polarization of **1 (323** K**)** with a point charge model.

| Atoms | Atom coordinate | | Coordinate of charge center |
| --- | --- | --- | --- |
| N | N1 (0.00000, 0.47710, 0.05100) | N2 (1.00000, 0.47710, 0.05100) | (0.5, 0.5, 0.3010) |
| N3 (0.50000, 0.97710, 0.05100) | N4 (0.00000, 0.52290, 0.55100) |
| N5 (1.00000, 0.52290, 0.55100) | N6 (0.50000, 0.02290, 0.55100) |
| P | P1 (0.00000, 0.01100, 0.86230) | P2 (1.00000, 0.01100, 0.86230) | (0.5, 0.5, 0.6123) |
| P3 (0.50000, 0.51100, 0.86230) | P4 (0.00000, 0.98900, 0.36230) |
| P5 (1.00000, 0.98900, 0.36230) | P6 (0.50000, 0.48900, 0.36230) |

*P*s = (qPrP + qNrN) / V

*P*s = [(-e × 0.6123) + (e × 0.3010)] × 4× c / V

*P*s = −0.122 C/m2

|*P*s| = 0.122 C/m2 = 12.2 *μ*C/cm2
